# Supplementary material
Source: publisher site journal article supplement (https://www.dovepress.com/get_supplementary_file.php?f=183062-Table-S2.xlsx)
Supplement: Supplementary file 1 [file get_supplementary_file.php]

## Sheet: High expression of DCTN4
NAME	GS<br> follow link to MSigDB	GS DETAILS	SIZE	ES	NES	NOM p-val	FDR q-val	FWER p-val	RANK AT MAX	LEADING EDGE
GO_PHOSPHATASE_COMPLEX	GO_PHOSPHATASE_COMPLEX	Details ...	43	0.57328	2.03245	0.002	0.490706	0.247	1392	tags=42%, list=8%, signal=45%
GO_ENDOPLASMIC_RETICULUM_ORGANIZATION	GO_ENDOPLASMIC_RETICULUM_ORGANIZATION	Details ...	36	0.573275	1.90268	0.00398406	1	0.665	1844	tags=39%, list=10%, signal=43%
GO_UBIQUITIN_LIKE_PROTEIN_LIGASE_ACTIVITY	GO_UBIQUITIN_LIKE_PROTEIN_LIGASE_ACTIVITY	Details ...	187	0.415303	1.84948	0	1	0.813	3198	tags=39%, list=18%, signal=47%
GO_UBIQUITIN_LIGASE_COMPLEX	GO_UBIQUITIN_LIGASE_COMPLEX	Details ...	246	0.412476	1.84926	0	1	0.813	3050	tags=36%, list=17%, signal=43%
GO_REGULATION_OF_COFACTOR_METABOLIC_PROCESS	GO_REGULATION_OF_COFACTOR_METABOLIC_PROCESS	Details ...	46	0.470734	1.82456	0.00193798	1	0.873	3662	tags=33%, list=21%, signal=41%
GO_UBIQUITIN_LIKE_PROTEIN_TRANSFERASE_ACTIVITY	GO_UBIQUITIN_LIKE_PROTEIN_TRANSFERASE_ACTIVITY	Details ...	393	0.385006	1.81888	0	1	0.882	3198	tags=35%, list=18%, signal=42%
GO_MAGNESIUM_ION_TRANSMEMBRANE_TRANSPORT	GO_MAGNESIUM_ION_TRANSMEMBRANE_TRANSPORT	Details ...	16	0.677369	1.81703	0.00205761	1	0.883	3421	tags=63%, list=19%, signal=77%
GO_NLS_BEARING_PROTEIN_IMPORT_INTO_NUCLEUS	GO_NLS_BEARING_PROTEIN_IMPORT_INTO_NUCLEUS	Details ...	22	0.611835	1.81118	0.0039604	1	0.893	1819	tags=45%, list=10%, signal=51%
GO_CYTOPLASMIC_DYNEIN_COMPLEX	GO_CYTOPLASMIC_DYNEIN_COMPLEX	Details ...	15	0.642398	1.78283	0.00197239	1	0.928	1755	tags=33%, list=10%, signal=37%
GO_CULLIN_RING_UBIQUITIN_LIGASE_COMPLEX	GO_CULLIN_RING_UBIQUITIN_LIGASE_COMPLEX	Details ...	139	0.413164	1.77178	0	1	0.94	2149	tags=30%, list=12%, signal=34%
GO_MICROVILLUS_ORGANIZATION	GO_MICROVILLUS_ORGANIZATION	Details ...	19	0.595362	1.76732	0.00421941	1	0.942	1332	tags=32%, list=8%, signal=34%
GO_ER_NUCLEUS_SIGNALING_PATHWAY	GO_ER_NUCLEUS_SIGNALING_PATHWAY	Details ...	31	0.539516	1.7467	0.00788955	1	0.965	3814	tags=52%, list=22%, signal=66%
GO_PROTEIN_PHOSPHATASE_TYPE_2A_COMPLEX	GO_PROTEIN_PHOSPHATASE_TYPE_2A_COMPLEX	Details ...	19	0.554667	1.74469	0.011811	1	0.967	2939	tags=53%, list=17%, signal=63%
GO_PROTEIN_TRANSPORTER_ACTIVITY	GO_PROTEIN_TRANSPORTER_ACTIVITY	Details ...	96	0.444109	1.73998	0.00200803	1	0.967	1819	tags=32%, list=10%, signal=36%
GO_RESPONSE_TO_X_RAY	GO_RESPONSE_TO_X_RAY	Details ...	30	0.538901	1.71748	0.0208729	1	0.981	3310	tags=37%, list=19%, signal=45%
GO_PROTEIN_K48_LINKED_UBIQUITINATION	GO_PROTEIN_K48_LINKED_UBIQUITINATION	Details ...	45	0.484336	1.71064	0.012605	1	0.985	3134	tags=42%, list=18%, signal=51%
GO_GOLGI_VESICLE_TRANSPORT	GO_GOLGI_VESICLE_TRANSPORT	Details ...	307	0.367359	1.71045	0.00389105	1	0.985	3199	tags=33%, list=18%, signal=40%
GO_GLUCOSYLTRANSFERASE_ACTIVITY	GO_GLUCOSYLTRANSFERASE_ACTIVITY	Details ...	16	0.63466	1.70917	0.0140562	1	0.987	3518	tags=69%, list=20%, signal=86%
GO_RIBOSOME_BINDING	GO_RIBOSOME_BINDING	Details ...	43	0.478347	1.70827	0.0139442	1	0.987	2169	tags=37%, list=12%, signal=42%
GO_PROTEIN_HETEROTETRAMERIZATION	GO_PROTEIN_HETEROTETRAMERIZATION	Details ...	36	0.689106	1.68684	0.0833333	1	0.992	2902	tags=67%, list=16%, signal=80%
GO_PROTEIN_UBIQUITINATION_INVOLVED_IN_UBIQUITIN_DEPENDENT_PROTEIN_CATABOLIC_PROCESS	GO_PROTEIN_UBIQUITINATION_INVOLVED_IN_UBIQUITIN_DEPENDENT_PROTEIN_CATABOLIC_PROCESS	Details ...	127	0.405676	1.68656	0.00205339	1	0.992	3052	tags=35%, list=17%, signal=42%
GO_CYTOPLASMIC_STRESS_GRANULE	GO_CYTOPLASMIC_STRESS_GRANULE	Details ...	31	0.541115	1.68639	0.0329897	1	0.992	2427	tags=42%, list=14%, signal=49%
GO_NUCLEAR_TRANSCRIBED_MRNA_POLY_A_TAIL_SHORTENING	GO_NUCLEAR_TRANSCRIBED_MRNA_POLY_A_TAIL_SHORTENING	Details ...	23	0.551024	1.68438	0.0205339	1	0.992	1141	tags=39%, list=6%, signal=42%
GO_PROTEIN_K63_LINKED_DEUBIQUITINATION	GO_PROTEIN_K63_LINKED_DEUBIQUITINATION	Details ...	22	0.527184	1.67605	0.0159681	1	0.994	1961	tags=41%, list=11%, signal=46%
GO_TRANSLATION_REPRESSOR_ACTIVITY	GO_TRANSLATION_REPRESSOR_ACTIVITY	Details ...	20	0.568731	1.67575	0.016129	1	0.994	1916	tags=35%, list=11%, signal=39%
GO_PROTEIN_AUTOUBIQUITINATION	GO_PROTEIN_AUTOUBIQUITINATION	Details ...	47	0.473244	1.67333	0.0127389	1	0.994	3198	tags=40%, list=18%, signal=49%
GO_PHOSPHATIDYLINOSITOL_4_PHOSPHATE_BINDING	GO_PHOSPHATIDYLINOSITOL_4_PHOSPHATE_BINDING	Details ...	19	0.536989	1.67072	0.0289256	1	0.994	1605	tags=37%, list=9%, signal=40%
GO_GOLGI_ORGANIZATION	GO_GOLGI_ORGANIZATION	Details ...	83	0.425661	1.66994	0.0243902	1	0.994	3610	tags=46%, list=20%, signal=57%
GO_UBIQUITIN_LIKE_PROTEIN_CONJUGATING_ENZYME_ACTIVITY	GO_UBIQUITIN_LIKE_PROTEIN_CONJUGATING_ENZYME_ACTIVITY	Details ...	29	0.556025	1.6652	0.0345528	1	0.994	3134	tags=48%, list=18%, signal=59%
GO_NEGATIVE_REGULATION_OF_RESPONSE_TO_ENDOPLASMIC_RETICULUM_STRESS	GO_NEGATIVE_REGULATION_OF_RESPONSE_TO_ENDOPLASMIC_RETICULUM_STRESS	Details ...	34	0.480369	1.65944	0.0289575	1	0.994	2489	tags=41%, list=14%, signal=48%
GO_GDP_BINDING	GO_GDP_BINDING	Details ...	47	0.511799	1.65595	0.0394477	1	0.994	1886	tags=38%, list=11%, signal=43%
GO_HISTONE_H2A_UBIQUITINATION	GO_HISTONE_H2A_UBIQUITINATION	Details ...	16	0.577746	1.65259	0.0128205	1	0.994	3403	tags=56%, list=19%, signal=70%
GO_ATPASE_ACTIVATOR_ACTIVITY	GO_ATPASE_ACTIVATOR_ACTIVITY	Details ...	17	0.568876	1.64643	0.015534	1	0.994	1872	tags=35%, list=11%, signal=39%
GO_POST_GOLGI_VESICLE_MEDIATED_TRANSPORT	GO_POST_GOLGI_VESICLE_MEDIATED_TRANSPORT	Details ...	81	0.416967	1.64432	0.0200401	1	0.994	2296	tags=32%, list=13%, signal=37%
GO_MANGANESE_ION_BINDING	GO_MANGANESE_ION_BINDING	Details ...	44	0.440068	1.63221	0.0159681	1	0.996	2270	tags=34%, list=13%, signal=39%
GO_POSITIVE_REGULATION_OF_PROTEIN_AUTOPHOSPHORYLATION	GO_POSITIVE_REGULATION_OF_PROTEIN_AUTOPHOSPHORYLATION	Details ...	21	0.511276	1.63007	0.0258964	1	0.996	1328	tags=29%, list=8%, signal=31%
GO_TRANSLATION_FACTOR_ACTIVITY_RNA_BINDING	GO_TRANSLATION_FACTOR_ACTIVITY_RNA_BINDING	Details ...	82	0.48274	1.62396	0.0567515	1	0.997	3129	tags=41%, list=18%, signal=50%
GO_CUL4_RING_E3_UBIQUITIN_LIGASE_COMPLEX	GO_CUL4_RING_E3_UBIQUITIN_LIGASE_COMPLEX	Details ...	25	0.543708	1.62386	0.0271399	1	0.997	3723	tags=52%, list=21%, signal=66%
GO_REGULATION_OF_PROTEIN_PHOSPHATASE_TYPE_2A_ACTIVITY	GO_REGULATION_OF_PROTEIN_PHOSPHATASE_TYPE_2A_ACTIVITY	Details ...	23	0.49739	1.61697	0.0221328	1	0.997	3426	tags=52%, list=19%, signal=65%
GO_REGULATION_OF_PROTEASOMAL_UBIQUITIN_DEPENDENT_PROTEIN_CATABOLIC_PROCESS	GO_REGULATION_OF_PROTEASOMAL_UBIQUITIN_DEPENDENT_PROTEIN_CATABOLIC_PROCESS	Details ...	141	0.377143	1.61239	0.0184805	1	0.997	3095	tags=38%, list=18%, signal=46%
GO_INTRA_GOLGI_VESICLE_MEDIATED_TRANSPORT	GO_INTRA_GOLGI_VESICLE_MEDIATED_TRANSPORT	Details ...	44	0.471345	1.61228	0.033195	1	0.997	4686	tags=52%, list=27%, signal=71%
GO_PROTEIN_MONOUBIQUITINATION	GO_PROTEIN_MONOUBIQUITINATION	Details ...	49	0.442373	1.61197	0.0214844	1	0.997	3905	tags=49%, list=22%, signal=63%
GO_NUCLEAR_ENVELOPE	GO_NUCLEAR_ENVELOPE	Details ...	379	0.332623	1.60747	0.01	1	0.997	3407	tags=33%, list=19%, signal=40%
GO_HISTONE_UBIQUITINATION	GO_HISTONE_UBIQUITINATION	Details ...	33	0.478631	1.60177	0.0196464	1	0.997	3512	tags=48%, list=20%, signal=60%
GO_UBIQUITIN_LIKE_PROTEIN_BINDING	GO_UBIQUITIN_LIKE_PROTEIN_BINDING	Details ...	113	0.36222	1.60148	0.0117647	1	0.997	3521	tags=41%, list=20%, signal=51%
GO_REGULATION_OF_SULFUR_METABOLIC_PROCESS	GO_REGULATION_OF_SULFUR_METABOLIC_PROCESS	Details ...	19	0.540263	1.60126	0.0289855	1	0.997	3662	tags=47%, list=21%, signal=60%
GO_CELLULAR_CARBOHYDRATE_CATABOLIC_PROCESS	GO_CELLULAR_CARBOHYDRATE_CATABOLIC_PROCESS	Details ...	31	0.477165	1.59738	0.023166	1	0.997	1250	tags=26%, list=7%, signal=28%
GO_MEMBRANE_BUDDING	GO_MEMBRANE_BUDDING	Details ...	111	0.392628	1.59562	0.0314961	1	0.997	2550	tags=33%, list=14%, signal=39%
GO_TRANSLATION_REGULATOR_ACTIVITY	GO_TRANSLATION_REGULATOR_ACTIVITY	Details ...	34	0.461243	1.59549	0.0200803	1	0.997	2170	tags=26%, list=12%, signal=30%
GO_PROTEIN_SERINE_THREONINE_PHOSPHATASE_ACTIVITY	GO_PROTEIN_SERINE_THREONINE_PHOSPHATASE_ACTIVITY	Details ...	63	0.39834	1.59439	0.0159363	1	0.997	2015	tags=29%, list=11%, signal=32%
GO_PROTEIN_POLYUBIQUITINATION	GO_PROTEIN_POLYUBIQUITINATION	Details ...	233	0.368999	1.59324	0.0318091	1	0.997	3189	tags=34%, list=18%, signal=41%
GO_ORGANELLE_TRANSPORT_ALONG_MICROTUBULE	GO_ORGANELLE_TRANSPORT_ALONG_MICROTUBULE	Details ...	54	0.397962	1.59128	0.0186335	1	0.997	1329	tags=26%, list=8%, signal=28%
GO_ER_TO_GOLGI_VESICLE_MEDIATED_TRANSPORT	GO_ER_TO_GOLGI_VESICLE_MEDIATED_TRANSPORT	Details ...	160	0.366081	1.58582	0.032197	1	0.999	3199	tags=33%, list=18%, signal=40%
GO_ANDROGEN_RECEPTOR_SIGNALING_PATHWAY	GO_ANDROGEN_RECEPTOR_SIGNALING_PATHWAY	Details ...	40	0.439126	1.57534	0.0258449	1	0.999	3646	tags=38%, list=21%, signal=47%
GO_NEGATIVE_REGULATION_OF_CELLULAR_AMIDE_METABOLIC_PROCESS	GO_NEGATIVE_REGULATION_OF_CELLULAR_AMIDE_METABOLIC_PROCESS	Details ...	119	0.365453	1.57201	0.0139721	1	0.999	1475	tags=21%, list=8%, signal=23%
GO_REGULATION_OF_HEMATOPOIETIC_PROGENITOR_CELL_DIFFERENTIATION	GO_REGULATION_OF_HEMATOPOIETIC_PROGENITOR_CELL_DIFFERENTIATION	Details ...	40	0.501105	1.57058	0.0909091	1	0.999	2899	tags=45%, list=16%, signal=54%
GO_RIBONUCLEOPROTEIN_COMPLEX_BINDING	GO_RIBONUCLEOPROTEIN_COMPLEX_BINDING	Details ...	89	0.428113	1.56804	0.0517928	1	0.999	3120	tags=40%, list=18%, signal=49%
GO_NUCLEAR_TRANSCRIBED_MRNA_CATABOLIC_PROCESS_DEADENYLATION_DEPENDENT_DECAY	GO_NUCLEAR_TRANSCRIBED_MRNA_CATABOLIC_PROCESS_DEADENYLATION_DEPENDENT_DECAY	Details ...	53	0.454902	1.56505	0.055666	1	0.999	2713	tags=38%, list=15%, signal=44%
GO_TRANSCRIPTION_ELONGATION_FACTOR_COMPLEX	GO_TRANSCRIPTION_ELONGATION_FACTOR_COMPLEX	Details ...	36	0.477441	1.56036	0.0491159	1	1	4014	tags=61%, list=23%, signal=79%
GO_SINGLE_ORGANISM_MEMBRANE_BUDDING	GO_SINGLE_ORGANISM_MEMBRANE_BUDDING	Details ...	71	0.410261	1.56018	0.0255403	1	1	2389	tags=32%, list=14%, signal=37%
GO_RETROMER_COMPLEX	GO_RETROMER_COMPLEX	Details ...	20	0.475725	1.55547	0.0379242	1	1	1230	tags=30%, list=7%, signal=32%
GO_REGULATION_OF_INTRACELLULAR_ESTROGEN_RECEPTOR_SIGNALING_PATHWAY	GO_REGULATION_OF_INTRACELLULAR_ESTROGEN_RECEPTOR_SIGNALING_PATHWAY	Details ...	24	0.465506	1.55379	0.0196078	1	1	1515	tags=29%, list=9%, signal=32%
GO_PROTEASOMAL_PROTEIN_CATABOLIC_PROCESS	GO_PROTEASOMAL_PROTEIN_CATABOLIC_PROCESS	Details ...	262	0.370384	1.55049	0.046	1	1	3698	tags=39%, list=21%, signal=49%
GO_PROTEIN_K11_LINKED_UBIQUITINATION	GO_PROTEIN_K11_LINKED_UBIQUITINATION	Details ...	26	0.538973	1.54107	0.0510204	1	1	3134	tags=46%, list=18%, signal=56%
GO_PROTEIN_PHOSPHATASE_1_BINDING	GO_PROTEIN_PHOSPHATASE_1_BINDING	Details ...	19	0.46981	1.5404	0.040404	1	1	784	tags=26%, list=4%, signal=28%
GO_PRE_MRNA_BINDING	GO_PRE_MRNA_BINDING	Details ...	24	0.536973	1.54031	0.0847784	1	1	2697	tags=38%, list=15%, signal=44%
GO_NUCLEOTIDE_KINASE_ACTIVITY	GO_NUCLEOTIDE_KINASE_ACTIVITY	Details ...	24	0.448978	1.53756	0.0326531	1	1	2453	tags=25%, list=14%, signal=29%
GO_ANTEROGRADE_AXONAL_TRANSPORT	GO_ANTEROGRADE_AXONAL_TRANSPORT	Details ...	22	0.471462	1.53356	0.0362173	1	1	1329	tags=27%, list=8%, signal=29%
GO_REGULATION_OF_CHROMOSOME_SEGREGATION	GO_REGULATION_OF_CHROMOSOME_SEGREGATION	Details ...	77	0.482112	1.53256	0.0994036	1	1	4422	tags=58%, list=25%, signal=78%
GO_ATPASE_REGULATOR_ACTIVITY	GO_ATPASE_REGULATOR_ACTIVITY	Details ...	30	0.481457	1.53165	0.0399202	1	1	1872	tags=27%, list=11%, signal=30%
GO_NUCLEAR_MEMBRANE	GO_NUCLEAR_MEMBRANE	Details ...	251	0.32116	1.52903	0.018	1	1	3197	tags=32%, list=18%, signal=38%
GO_REGULATION_OF_SISTER_CHROMATID_SEGREGATION	GO_REGULATION_OF_SISTER_CHROMATID_SEGREGATION	Details ...	61	0.480009	1.52901	0.0878243	1	1	4546	tags=62%, list=26%, signal=84%
GO_RNA_PHOSPHODIESTER_BOND_HYDROLYSIS_EXONUCLEOLYTIC	GO_RNA_PHOSPHODIESTER_BOND_HYDROLYSIS_EXONUCLEOLYTIC	Details ...	33	0.4991	1.52489	0.061753	1	1	2077	tags=36%, list=12%, signal=41%
GO_NUCLEUS_ORGANIZATION	GO_NUCLEUS_ORGANIZATION	Details ...	121	0.379291	1.52392	0.0557769	1	1	3586	tags=42%, list=20%, signal=53%
GO_REGULATION_OF_PHOSPHOPROTEIN_PHOSPHATASE_ACTIVITY	GO_REGULATION_OF_PHOSPHOPROTEIN_PHOSPHATASE_ACTIVITY	Details ...	57	0.382678	1.52283	0.0304878	1	1	3443	tags=39%, list=19%, signal=48%
GO_POLYOL_CATABOLIC_PROCESS	GO_POLYOL_CATABOLIC_PROCESS	Details ...	17	0.535248	1.52089	0.0753564	1	1	3094	tags=47%, list=18%, signal=57%
GO_PROTEIN_KINASE_COMPLEX	GO_PROTEIN_KINASE_COMPLEX	Details ...	88	0.362806	1.51753	0.0301205	1	1	4637	tags=45%, list=26%, signal=61%
GO_GOLGI_TO_PLASMA_MEMBRANE_PROTEIN_TRANSPORT	GO_GOLGI_TO_PLASMA_MEMBRANE_PROTEIN_TRANSPORT	Details ...	26	0.450734	1.51532	0.0448065	1	1	3802	tags=42%, list=22%, signal=54%
GO_VESICLE_COATING	GO_VESICLE_COATING	Details ...	73	0.387179	1.51246	0.0518234	1	1	1652	tags=26%, list=9%, signal=29%
GO_MITOTIC_CYTOKINESIS	GO_MITOTIC_CYTOKINESIS	Details ...	31	0.495202	1.51094	0.0681818	1	1	3606	tags=55%, list=20%, signal=69%
GO_SIGNAL_SEQUENCE_BINDING	GO_SIGNAL_SEQUENCE_BINDING	Details ...	36	0.452423	1.5102	0.0495049	1	1	2400	tags=33%, list=14%, signal=38%
GO_NUCLEAR_INNER_MEMBRANE	GO_NUCLEAR_INNER_MEMBRANE	Details ...	45	0.38737	1.50737	0.0221328	1	1	2133	tags=31%, list=12%, signal=35%
GO_COPI_COATED_VESICLE_MEMBRANE	GO_COPI_COATED_VESICLE_MEMBRANE	Details ...	16	0.563601	1.50508	0.0786517	1	1	3199	tags=56%, list=18%, signal=69%
GO_DNA_DOUBLE_STRAND_BREAK_PROCESSING	GO_DNA_DOUBLE_STRAND_BREAK_PROCESSING	Details ...	19	0.569505	1.50483	0.106426	1	1	3920	tags=63%, list=22%, signal=81%
GO_NEGATIVE_REGULATION_OF_NUCLEAR_DIVISION	GO_NEGATIVE_REGULATION_OF_NUCLEAR_DIVISION	Details ...	42	0.464005	1.50398	0.0940695	1	1	4546	tags=57%, list=26%, signal=77%
GO_CARBOXY_TERMINAL_DOMAIN_PROTEIN_KINASE_COMPLEX	GO_CARBOXY_TERMINAL_DOMAIN_PROTEIN_KINASE_COMPLEX	Details ...	22	0.529979	1.50304	0.0639535	1	1	3181	tags=55%, list=18%, signal=66%
GO_DNA_PACKAGING_COMPLEX	GO_DNA_PACKAGING_COMPLEX	Details ...	84	0.630659	1.50209	0.176817	1	1	4693	tags=77%, list=27%, signal=105%
GO_NUCLEAR_UBIQUITIN_LIGASE_COMPLEX	GO_NUCLEAR_UBIQUITIN_LIGASE_COMPLEX	Details ...	39	0.45487	1.50002	0.0588235	1	1	1705	tags=31%, list=10%, signal=34%
GO_PROTEIN_LOCALIZATION_TO_LYSOSOME	GO_PROTEIN_LOCALIZATION_TO_LYSOSOME	Details ...	17	0.50525	1.49723	0.0563674	1	1	3444	tags=59%, list=20%, signal=73%
GO_REGULATION_OF_UBIQUITIN_PROTEIN_LIGASE_ACTIVITY	GO_REGULATION_OF_UBIQUITIN_PROTEIN_LIGASE_ACTIVITY	Details ...	17	0.513855	1.49673	0.0842912	1	1	2570	tags=53%, list=15%, signal=62%
GO_POST_TRANSLATIONAL_PROTEIN_MODIFICATION	GO_POST_TRANSLATIONAL_PROTEIN_MODIFICATION	Details ...	32	0.458326	1.49628	0.0655106	1	1	3459	tags=38%, list=20%, signal=47%
GO_CHROMOSOME_LOCALIZATION	GO_CHROMOSOME_LOCALIZATION	Details ...	55	0.456308	1.49523	0.0949495	1	1	3030	tags=42%, list=17%, signal=50%
GO_DNA_BINDING_BENDING	GO_DNA_BINDING_BENDING	Details ...	19	0.513289	1.49492	0.0831722	1	1	3732	tags=37%, list=21%, signal=47%
GO_LIGASE_ACTIVITY	GO_LIGASE_ACTIVITY	Details ...	372	0.321216	1.49438	0.027833	1	1	3785	tags=35%, list=21%, signal=43%
GO_CYTOSKELETON_DEPENDENT_CYTOKINESIS	GO_CYTOSKELETON_DEPENDENT_CYTOKINESIS	Details ...	38	0.450543	1.48906	0.0718686	1	1	3606	tags=50%, list=20%, signal=63%
GO_PORE_COMPLEX_ASSEMBLY	GO_PORE_COMPLEX_ASSEMBLY	Details ...	15	0.594968	1.48896	0.0907258	1	1	4135	tags=60%, list=23%, signal=78%
GO_CELL_DIVISION	GO_CELL_DIVISION	Details ...	422	0.365156	1.48671	0.0668016	1	1	3606	tags=38%, list=20%, signal=46%
GO_GUANYL_NUCLEOTIDE_BINDING	GO_GUANYL_NUCLEOTIDE_BINDING	Details ...	351	0.309887	1.48664	0.0262626	1	1	1923	tags=20%, list=11%, signal=22%
GO_KINETOCHORE	GO_KINETOCHORE	Details ...	103	0.488759	1.48364	0.118644	1	1	3204	tags=46%, list=18%, signal=55%
GO_HISTONE_EXCHANGE	GO_HISTONE_EXCHANGE	Details ...	45	0.565112	1.48285	0.130612	1	1	3177	tags=56%, list=18%, signal=68%
GO_MYOSIN_V_BINDING	GO_MYOSIN_V_BINDING	Details ...	17	0.520618	1.48283	0.0773585	1	1	1886	tags=29%, list=11%, signal=33%
GO_PML_BODY	GO_PML_BODY	Details ...	92	0.366197	1.48237	0.0426829	1	1	3947	tags=42%, list=22%, signal=54%
GO_GLOBAL_GENOME_NUCLEOTIDE_EXCISION_REPAIR	GO_GLOBAL_GENOME_NUCLEOTIDE_EXCISION_REPAIR	Details ...	32	0.488595	1.48106	0.0816733	1	1	3372	tags=47%, list=19%, signal=58%
GO_ESTROGEN_METABOLIC_PROCESS	GO_ESTROGEN_METABOLIC_PROCESS	Details ...	23	0.469875	1.48008	0.0552147	1	1	1367	tags=22%, list=8%, signal=24%
GO_CHROMOSOME_CENTROMERIC_REGION	GO_CHROMOSOME_CENTROMERIC_REGION	Details ...	153	0.469271	1.47966	0.100858	1	1	3365	tags=45%, list=19%, signal=55%
GO_ZINC_II_ION_TRANSPORT	GO_ZINC_II_ION_TRANSPORT	Details ...	25	0.453101	1.47597	0.0740741	1	1	1102	tags=28%, list=6%, signal=30%
GO_REGULATION_OF_CELLULAR_AMIDE_METABOLIC_PROCESS	GO_REGULATION_OF_CELLULAR_AMIDE_METABOLIC_PROCESS	Details ...	318	0.313393	1.47491	0.0357853	1	1	2775	tags=25%, list=16%, signal=29%
GO_INTRAMOLECULAR_OXIDOREDUCTASE_ACTIVITY_TRANSPOSING_S_S_BONDS	GO_INTRAMOLECULAR_OXIDOREDUCTASE_ACTIVITY_TRANSPOSING_S_S_BONDS	Details ...	19	0.544711	1.47445	0.0909091	1	1	2329	tags=32%, list=13%, signal=36%
GO_INTRACILIARY_TRANSPORT_PARTICLE_B	GO_INTRACILIARY_TRANSPORT_PARTICLE_B	Details ...	18	0.582917	1.47427	0.0927419	1	1	3525	tags=50%, list=20%, signal=62%
GO_UBIQUITIN_LIKE_PROTEIN_CONJUGATING_ENZYME_BINDING	GO_UBIQUITIN_LIKE_PROTEIN_CONJUGATING_ENZYME_BINDING	Details ...	32	0.414058	1.47362	0.0535714	1	1	4112	tags=38%, list=23%, signal=49%
GO_SPINDLE_MICROTUBULE	GO_SPINDLE_MICROTUBULE	Details ...	56	0.440245	1.47223	0.0873181	1	1	3617	tags=48%, list=20%, signal=60%
GO_GTP_DEPENDENT_PROTEIN_BINDING	GO_GTP_DEPENDENT_PROTEIN_BINDING	Details ...	17	0.482507	1.47075	0.0724346	1	1	3153	tags=41%, list=18%, signal=50%
GO_S_ADENOSYLMETHIONINE_METABOLIC_PROCESS	GO_S_ADENOSYLMETHIONINE_METABOLIC_PROCESS	Details ...	18	0.489948	1.46934	0.0790514	1	1	842	tags=22%, list=5%, signal=23%
GO_MICROBODY_MEMBRANE	GO_MICROBODY_MEMBRANE	Details ...	57	0.416987	1.46892	0.0725806	1	1	3679	tags=44%, list=21%, signal=55%
GO_CENTROMERE_COMPLEX_ASSEMBLY	GO_CENTROMERE_COMPLEX_ASSEMBLY	Details ...	42	0.574592	1.46767	0.123984	1	1	2932	tags=55%, list=17%, signal=66%
GO_CELL_REDOX_HOMEOSTASIS	GO_CELL_REDOX_HOMEOSTASIS	Details ...	60	0.409084	1.46767	0.0661323	1	1	3172	tags=37%, list=18%, signal=45%
GO_GOLGI_TO_PLASMA_MEMBRANE_TRANSPORT	GO_GOLGI_TO_PLASMA_MEMBRANE_TRANSPORT	Details ...	41	0.394956	1.46512	0.0526316	1	1	2553	tags=32%, list=14%, signal=37%
GO_MICROTUBULE_ANCHORING	GO_MICROTUBULE_ANCHORING	Details ...	17	0.520697	1.46492	0.0868726	1	1	2731	tags=47%, list=15%, signal=56%
GO_EXOCYST	GO_EXOCYST	Details ...	15	0.496968	1.46447	0.0847108	1	1	4246	tags=67%, list=24%, signal=88%
GO_PROTEIN_DNA_COMPLEX	GO_PROTEIN_DNA_COMPLEX	Details ...	148	0.472936	1.46226	0.167641	1	1	4693	tags=61%, list=27%, signal=82%
GO_TELOMERE_CAPPING	GO_TELOMERE_CAPPING	Details ...	27	0.581428	1.46155	0.13843	1	1	3845	tags=67%, list=22%, signal=85%
GO_REGULATION_OF_DNA_DAMAGE_RESPONSE_SIGNAL_TRANSDUCTION_BY_P53_CLASS_MEDIATOR	GO_REGULATION_OF_DNA_DAMAGE_RESPONSE_SIGNAL_TRANSDUCTION_BY_P53_CLASS_MEDIATOR	Details ...	27	0.45371	1.46034	0.0805501	1	1	3914	tags=48%, list=22%, signal=62%
GO_NUCLEOBASE_CONTAINING_SMALL_MOLECULE_INTERCONVERSION	GO_NUCLEOBASE_CONTAINING_SMALL_MOLECULE_INTERCONVERSION	Details ...	21	0.540454	1.45934	0.0787402	1	1	4240	tags=52%, list=24%, signal=69%
GO_NEGATIVE_REGULATION_OF_GENE_EXPRESSION_EPIGENETIC	GO_NEGATIVE_REGULATION_OF_GENE_EXPRESSION_EPIGENETIC	Details ...	92	0.472582	1.4583	0.172481	1	1	2933	tags=51%, list=17%, signal=61%
GO_REGULATION_OF_PROTEASOMAL_PROTEIN_CATABOLIC_PROCESS	GO_REGULATION_OF_PROTEASOMAL_PROTEIN_CATABOLIC_PROCESS	Details ...	173	0.328628	1.45732	0.0472279	1	1	3095	tags=34%, list=18%, signal=41%
GO_CONDENSED_CHROMOSOME_CENTROMERIC_REGION	GO_CONDENSED_CHROMOSOME_CENTROMERIC_REGION	Details ...	83	0.51325	1.45729	0.157025	1	1	3128	tags=47%, list=18%, signal=57%
GO_POLY_PURINE_TRACT_BINDING	GO_POLY_PURINE_TRACT_BINDING	Details ...	18	0.51289	1.45657	0.0736196	1	1	3709	tags=44%, list=21%, signal=56%
GO_PROTEIN_LOCALIZATION_TO_GOLGI_APPARATUS	GO_PROTEIN_LOCALIZATION_TO_GOLGI_APPARATUS	Details ...	29	0.445901	1.4564	0.0745342	1	1	2496	tags=34%, list=14%, signal=40%
GO_UBIQUITIN_LIKE_PROTEIN_SPECIFIC_PROTEASE_ACTIVITY	GO_UBIQUITIN_LIKE_PROTEIN_SPECIFIC_PROTEASE_ACTIVITY	Details ...	91	0.386642	1.45618	0.0674847	1	1	3521	tags=41%, list=20%, signal=51%
GO_RNA_POLYMERASE_II_CARBOXY_TERMINAL_DOMAIN_KINASE_ACTIVITY	GO_RNA_POLYMERASE_II_CARBOXY_TERMINAL_DOMAIN_KINASE_ACTIVITY	Details ...	16	0.556609	1.45511	0.0831643	1	1	3000	tags=56%, list=17%, signal=68%
GO_CUL3_RING_UBIQUITIN_LIGASE_COMPLEX	GO_CUL3_RING_UBIQUITIN_LIGASE_COMPLEX	Details ...	58	0.380415	1.45446	0.0405405	1	1	2149	tags=28%, list=12%, signal=31%
GO_ENDOMEMBRANE_SYSTEM_ORGANIZATION	GO_ENDOMEMBRANE_SYSTEM_ORGANIZATION	Details ...	446	0.29349	1.45368	0.0221774	1	1	2563	tags=24%, list=15%, signal=28%
GO_ARP2_3_COMPLEX_MEDIATED_ACTIN_NUCLEATION	GO_ARP2_3_COMPLEX_MEDIATED_ACTIN_NUCLEATION	Details ...	15	0.54112	1.45324	0.0922131	1	1	1684	tags=40%, list=10%, signal=44%
GO_PROTEIN_MODIFICATION_BY_SMALL_PROTEIN_REMOVAL	GO_PROTEIN_MODIFICATION_BY_SMALL_PROTEIN_REMOVAL	Details ...	107	0.363908	1.45284	0.0661323	1	1	3521	tags=39%, list=20%, signal=49%
GO_DNA_REPLICATION_DEPENDENT_NUCLEOSOME_ORGANIZATION	GO_DNA_REPLICATION_DEPENDENT_NUCLEOSOME_ORGANIZATION	Details ...	31	0.647277	1.44544	0.172414	1	1	2902	tags=71%, list=16%, signal=85%
GO_BITTER_TASTE_RECEPTOR_ACTIVITY	GO_BITTER_TASTE_RECEPTOR_ACTIVITY	Details ...	15	0.730696	1.43931	0.111554	1	1	3704	tags=73%, list=21%, signal=93%
GO_RIBONUCLEOPROTEIN_GRANULE	GO_RIBONUCLEOPROTEIN_GRANULE	Details ...	137	0.342144	1.43842	0.0776892	1	1	3627	tags=35%, list=21%, signal=44%
GO_CHROMOSOMAL_REGION	GO_CHROMOSOMAL_REGION	Details ...	295	0.419191	1.43795	0.123457	1	1	3244	tags=42%, list=18%, signal=50%
GO_CYSTEINE_TYPE_PEPTIDASE_ACTIVITY	GO_CYSTEINE_TYPE_PEPTIDASE_ACTIVITY	Details ...	151	0.323517	1.43758	0.0493097	1	1	3832	tags=36%, list=22%, signal=46%
GO_VESICLE_TARGETING	GO_VESICLE_TARGETING	Details ...	75	0.366915	1.43721	0.0623782	1	1	1652	tags=25%, list=9%, signal=28%
GO_NUCLEAR_CHROMOSOME_SEGREGATION	GO_NUCLEAR_CHROMOSOME_SEGREGATION	Details ...	201	0.426056	1.43569	0.149105	1	1	3128	tags=41%, list=18%, signal=49%
GO_CYTOKINESIS	GO_CYTOKINESIS	Details ...	80	0.364553	1.43513	0.0684105	1	1	3606	tags=41%, list=20%, signal=52%
GO_REGULATION_OF_NUCLEAR_DIVISION	GO_REGULATION_OF_NUCLEAR_DIVISION	Details ...	152	0.355067	1.43493	0.0876494	1	1	2570	tags=30%, list=15%, signal=35%
GO_PRENYLTRANSFERASE_ACTIVITY	GO_PRENYLTRANSFERASE_ACTIVITY	Details ...	15	0.542252	1.43434	0.11753	1	1	1994	tags=40%, list=11%, signal=45%
GO_FC_EPSILON_RECEPTOR_SIGNALING_PATHWAY	GO_FC_EPSILON_RECEPTOR_SIGNALING_PATHWAY	Details ...	123	0.366247	1.43425	0.095723	1	1	2463	tags=27%, list=14%, signal=31%
GO_POSITIVE_REGULATION_OF_CYTOKINESIS	GO_POSITIVE_REGULATION_OF_CYTOKINESIS	Details ...	26	0.457736	1.43377	0.098	1	1	3059	tags=38%, list=17%, signal=46%
GO_POSITIVE_REGULATION_OF_CELL_CYCLE_PHASE_TRANSITION	GO_POSITIVE_REGULATION_OF_CELL_CYCLE_PHASE_TRANSITION	Details ...	66	0.367372	1.43314	0.088	1	1	2412	tags=29%, list=14%, signal=33%
GO_RNA_POLYMERASE_BINDING	GO_RNA_POLYMERASE_BINDING	Details ...	32	0.439157	1.43266	0.0674847	1	1	3512	tags=50%, list=20%, signal=62%
GO_ORGANELLE_ASSEMBLY	GO_ORGANELLE_ASSEMBLY	Details ...	447	0.300787	1.4324	0.0300601	1	1	3617	tags=31%, list=20%, signal=38%
GO_APICAL_JUNCTION_ASSEMBLY	GO_APICAL_JUNCTION_ASSEMBLY	Details ...	38	0.404841	1.43209	0.0817996	1	1	1992	tags=34%, list=11%, signal=38%
GO_PROTEIN_COMPLEX_LOCALIZATION	GO_PROTEIN_COMPLEX_LOCALIZATION	Details ...	50	0.376978	1.43199	0.0819672	1	1	3644	tags=40%, list=21%, signal=50%
GO_CILIUM_ORGANIZATION	GO_CILIUM_ORGANIZATION	Details ...	166	0.35925	1.43104	0.0803922	1	1	4772	tags=46%, list=27%, signal=62%
GO_NUCLEAR_LOCALIZATION_SEQUENCE_BINDING	GO_NUCLEAR_LOCALIZATION_SEQUENCE_BINDING	Details ...	20	0.517358	1.43055	0.118474	1	1	2213	tags=40%, list=13%, signal=46%
GO_PROTEIN_DEPHOSPHORYLATION	GO_PROTEIN_DEPHOSPHORYLATION	Details ...	178	0.305085	1.43009	0.0419287	1	1	2142	tags=21%, list=12%, signal=23%
GO_REGULATION_OF_PROTEIN_EXIT_FROM_ENDOPLASMIC_RETICULUM	GO_REGULATION_OF_PROTEIN_EXIT_FROM_ENDOPLASMIC_RETICULUM	Details ...	18	0.481976	1.42966	0.104247	0.996056	1	1222	tags=33%, list=7%, signal=36%
GO_VESICLE_ORGANIZATION	GO_VESICLE_ORGANIZATION	Details ...	264	0.305918	1.42847	0.0476191	0.995984	1	2550	tags=23%, list=14%, signal=27%
GO_ESTABLISHMENT_OF_LOCALIZATION_BY_MOVEMENT_ALONG_MICROTUBULE	GO_ESTABLISHMENT_OF_LOCALIZATION_BY_MOVEMENT_ALONG_MICROTUBULE	Details ...	90	0.334509	1.42807	0.0558882	0.991725	1	3593	tags=34%, list=20%, signal=43%
GO_SINGLE_FERTILIZATION	GO_SINGLE_FERTILIZATION	Details ...	90	0.351586	1.42709	0.0486381	0.990762	1	4731	tags=34%, list=27%, signal=47%
GO_2_IRON_2_SULFUR_CLUSTER_BINDING	GO_2_IRON_2_SULFUR_CLUSTER_BINDING	Details ...	20	0.584165	1.42617	0.135081	0.989389	1	4442	tags=70%, list=25%, signal=93%
GO_HISTONE_MONOUBIQUITINATION	GO_HISTONE_MONOUBIQUITINATION	Details ...	23	0.453732	1.42613	0.0862745	0.983382	1	3880	tags=52%, list=22%, signal=67%
GO_REGULATION_OF_RESPONSE_TO_DNA_DAMAGE_STIMULUS	GO_REGULATION_OF_RESPONSE_TO_DNA_DAMAGE_STIMULUS	Details ...	134	0.337359	1.42533	0.052	0.981378	1	3561	tags=36%, list=20%, signal=45%
GO_PROTEIN_TETRAMERIZATION	GO_PROTEIN_TETRAMERIZATION	Details ...	130	0.359069	1.42136	0.113281	0.995728	1	2902	tags=32%, list=16%, signal=37%
GO_REGULATION_OF_TRANSLATIONAL_INITIATION	GO_REGULATION_OF_TRANSLATIONAL_INITIATION	Details ...	80	0.387199	1.42093	0.0954274	0.991852	1	2451	tags=30%, list=14%, signal=35%
GO_NUCLEUS_LOCALIZATION	GO_NUCLEUS_LOCALIZATION	Details ...	20	0.485825	1.42091	0.0934394	0.985852	1	2003	tags=30%, list=11%, signal=34%
GO_NEGATIVE_REGULATION_OF_CELL_DIVISION	GO_NEGATIVE_REGULATION_OF_CELL_DIVISION	Details ...	56	0.414044	1.42014	0.125257	0.983979	1	4608	tags=55%, list=26%, signal=75%
GO_REGULATION_OF_TRANSCRIPTION_FROM_RNA_POLYMERASE_II_PROMOTER_IN_RESPONSE_TO_HYPOXIA	GO_REGULATION_OF_TRANSCRIPTION_FROM_RNA_POLYMERASE_II_PROMOTER_IN_RESPONSE_TO_HYPOXIA	Details ...	30	0.405229	1.41992	0.0665323	0.979222	1	1346	tags=23%, list=8%, signal=25%
GO_NEGATIVE_REGULATION_OF_HEMATOPOIETIC_PROGENITOR_CELL_DIFFERENTIATION	GO_NEGATIVE_REGULATION_OF_HEMATOPOIETIC_PROGENITOR_CELL_DIFFERENTIATION	Details ...	23	0.55752	1.41845	0.17451	0.980918	1	2899	tags=57%, list=16%, signal=68%
GO_CELLULAR_RESPONSE_TO_DRUG	GO_CELLULAR_RESPONSE_TO_DRUG	Details ...	66	0.340359	1.41835	0.0482897	0.975638	1	2050	tags=20%, list=12%, signal=22%
GO_VESICLE_CYTOSKELETAL_TRAFFICKING	GO_VESICLE_CYTOSKELETAL_TRAFFICKING	Details ...	36	0.384573	1.41791	0.0838574	0.971997	1	1896	tags=28%, list=11%, signal=31%
GO_PEROXISOME_ORGANIZATION	GO_PEROXISOME_ORGANIZATION	Details ...	33	0.446069	1.41783	0.116505	0.966759	1	3679	tags=55%, list=21%, signal=69%
GO_CHROMATIN_SILENCING	GO_CHROMATIN_SILENCING	Details ...	75	0.490033	1.41639	0.212062	0.968276	1	2933	tags=55%, list=17%, signal=65%
GO_NUCLEAR_NUCLEOSOME	GO_NUCLEAR_NUCLEOSOME	Details ...	33	0.679513	1.41496	0.181637	0.969943	1	4811	tags=88%, list=27%, signal=121%
GO_TBP_CLASS_PROTEIN_BINDING	GO_TBP_CLASS_PROTEIN_BINDING	Details ...	20	0.471807	1.41319	0.0914286	0.973316	1	1454	tags=35%, list=8%, signal=38%
GO_NUCLEAR_CYCLIN_DEPENDENT_PROTEIN_KINASE_HOLOENZYME_COMPLEX	GO_NUCLEAR_CYCLIN_DEPENDENT_PROTEIN_KINASE_HOLOENZYME_COMPLEX	Details ...	15	0.504571	1.41307	0.0952381	0.968398	1	1094	tags=33%, list=6%, signal=36%
GO_CHROMOSOME_SEGREGATION	GO_CHROMOSOME_SEGREGATION	Details ...	244	0.412711	1.41271	0.149495	0.964605	1	3248	tags=40%, list=18%, signal=48%
GO_SITE_OF_DOUBLE_STRAND_BREAK	GO_SITE_OF_DOUBLE_STRAND_BREAK	Details ...	28	0.477103	1.41228	0.118474	0.961284	1	3780	tags=54%, list=21%, signal=68%
GO_MITOTIC_G2_M_TRANSITION_CHECKPOINT	GO_MITOTIC_G2_M_TRANSITION_CHECKPOINT	Details ...	17	0.518424	1.40998	0.117043	0.967677	1	3920	tags=53%, list=22%, signal=68%
GO_TRANSLATION_INITIATION_FACTOR_ACTIVITY	GO_TRANSLATION_INITIATION_FACTOR_ACTIVITY	Details ...	48	0.47965	1.40963	0.151874	0.964035	1	1832	tags=33%, list=10%, signal=37%
GO_NUCLEAR_PORE	GO_NUCLEAR_PORE	Details ...	73	0.433681	1.40934	0.130612	0.960172	1	3788	tags=49%, list=21%, signal=63%
GO_PROTEIN_DNA_COMPLEX_SUBUNIT_ORGANIZATION	GO_PROTEIN_DNA_COMPLEX_SUBUNIT_ORGANIZATION	Details ...	202	0.41815	1.40855	0.154309	0.958881	1	3897	tags=46%, list=22%, signal=58%
GO_CHROMATIN_SILENCING_AT_RDNA	GO_CHROMATIN_SILENCING_AT_RDNA	Details ...	35	0.607111	1.40771	0.207243	0.957494	1	4693	tags=80%, list=27%, signal=109%
GO_PCG_PROTEIN_COMPLEX	GO_PCG_PROTEIN_COMPLEX	Details ...	43	0.402078	1.40555	0.0866935	0.962757	1	2141	tags=30%, list=12%, signal=34%
GO_CILIUM_MORPHOGENESIS	GO_CILIUM_MORPHOGENESIS	Details ...	182	0.345796	1.40416	0.0848485	0.96445	1	4772	tags=43%, list=27%, signal=59%
GO_REGULATION_OF_FATTY_ACID_BIOSYNTHETIC_PROCESS	GO_REGULATION_OF_FATTY_ACID_BIOSYNTHETIC_PROCESS	Details ...	33	0.390454	1.40398	0.06	0.960177	1	2568	tags=27%, list=15%, signal=32%
GO_DNA_INTEGRITY_CHECKPOINT	GO_DNA_INTEGRITY_CHECKPOINT	Details ...	135	0.368586	1.40339	0.0991903	0.957784	1	3939	tags=44%, list=22%, signal=56%
GO_REGULATION_OF_TELOMERE_CAPPING	GO_REGULATION_OF_TELOMERE_CAPPING	Details ...	21	0.439043	1.4029	0.0962343	0.9551	1	2374	tags=33%, list=13%, signal=38%
GO_GENE_SILENCING_BY_RNA	GO_GENE_SILENCING_BY_RNA	Details ...	124	0.408825	1.4001	0.135827	0.963951	1	4280	tags=50%, list=24%, signal=66%
GO_NUCLEAR_ENVELOPE_REASSEMBLY	GO_NUCLEAR_ENVELOPE_REASSEMBLY	Details ...	17	0.486352	1.39903	0.122772	0.963937	1	1261	tags=35%, list=7%, signal=38%
GO_AXO_DENDRITIC_TRANSPORT	GO_AXO_DENDRITIC_TRANSPORT	Details ...	33	0.380236	1.39799	0.0584795	0.96392	1	1329	tags=21%, list=8%, signal=23%
GO_LIPASE_INHIBITOR_ACTIVITY	GO_LIPASE_INHIBITOR_ACTIVITY	Details ...	16	0.497425	1.39792	0.114	0.959224	1	2609	tags=25%, list=15%, signal=29%
GO_NUCLEAR_ENVELOPE_ORGANIZATION	GO_NUCLEAR_ENVELOPE_ORGANIZATION	Details ...	75	0.374881	1.39746	0.118236	0.956467	1	3788	tags=43%, list=21%, signal=54%
GO_CENTROSOME	GO_CENTROSOME	Details ...	456	0.311345	1.39703	0.0792683	0.953577	1	3983	tags=37%, list=23%, signal=47%
GO_ESC_E_Z_COMPLEX	GO_ESC_E_Z_COMPLEX	Details ...	16	0.512894	1.3948	0.127953	0.959724	1	3198	tags=50%, list=18%, signal=61%
GO_VESICLE_COAT	GO_VESICLE_COAT	Details ...	44	0.391033	1.39341	0.1	0.961605	1	3315	tags=39%, list=19%, signal=47%
GO_CELLULAR_COMPONENT_ASSEMBLY_INVOLVED_IN_MORPHOGENESIS	GO_CELLULAR_COMPONENT_ASSEMBLY_INVOLVED_IN_MORPHOGENESIS	Details ...	216	0.332987	1.39338	0.0712871	0.956811	1	4772	tags=41%, list=27%, signal=55%
GO_SUMO_TRANSFERASE_ACTIVITY	GO_SUMO_TRANSFERASE_ACTIVITY	Details ...	15	0.479677	1.39328	0.1	0.95242	1	2306	tags=47%, list=13%, signal=54%
GO_LIGASE_ACTIVITY_FORMING_CARBON_SULFUR_BONDS	GO_LIGASE_ACTIVITY_FORMING_CARBON_SULFUR_BONDS	Details ...	38	0.398098	1.39316	0.0901804	0.948238	1	1504	tags=26%, list=9%, signal=29%
GO_REGULATION_OF_TRANSLATIONAL_ELONGATION	GO_REGULATION_OF_TRANSLATIONAL_ELONGATION	Details ...	22	0.496277	1.39118	0.117296	0.952997	1	2999	tags=41%, list=17%, signal=49%
GO_MYELIN_ASSEMBLY	GO_MYELIN_ASSEMBLY	Details ...	15	0.491574	1.39061	0.117761	0.950999	1	3127	tags=47%, list=18%, signal=57%
GO_GLUTAMINE_METABOLIC_PROCESS	GO_GLUTAMINE_METABOLIC_PROCESS	Details ...	22	0.47299	1.39007	0.111765	0.94884	1	1681	tags=27%, list=10%, signal=30%
GO_HIPPO_SIGNALING	GO_HIPPO_SIGNALING		27	0.442313	1.38862	0.12831	0.951011	1	2806	tags=37%, list=16%, signal=44%
GO_DOUBLE_STRANDED_RNA_BINDING	GO_DOUBLE_STRANDED_RNA_BINDING		59	0.383882	1.3883	0.0945674	0.947801	1	3406	tags=39%, list=19%, signal=48%
GO_POSITIVE_REGULATION_OF_GENE_EXPRESSION_EPIGENETIC	GO_POSITIVE_REGULATION_OF_GENE_EXPRESSION_EPIGENETIC		75	0.439159	1.38639	0.170825	0.951675	1	4310	tags=57%, list=24%, signal=76%
GO_GTPASE_ACTIVITY	GO_GTPASE_ACTIVITY		231	0.305865	1.38547	0.0604839	0.951497	1	1894	tags=20%, list=11%, signal=22%
GO_NEGATIVE_REGULATION_OF_MEGAKARYOCYTE_DIFFERENTIATION	GO_NEGATIVE_REGULATION_OF_MEGAKARYOCYTE_DIFFERENTIATION		17	0.638877	1.38405	0.211045	0.953791	1	4263	tags=76%, list=24%, signal=101%
GO_CIS_GOLGI_NETWORK	GO_CIS_GOLGI_NETWORK		38	0.375436	1.38402	0.0961538	0.949327	1	2559	tags=34%, list=14%, signal=40%
GO_CELL_CYCLE_CHECKPOINT	GO_CELL_CYCLE_CHECKPOINT		178	0.362233	1.38264	0.120654	0.951087	1	3939	tags=42%, list=22%, signal=54%
GO_NEGATIVE_REGULATION_OF_CALCIUM_ION_IMPORT	GO_NEGATIVE_REGULATION_OF_CALCIUM_ION_IMPORT		23	0.44132	1.38173	0.095723	0.950922	1	1669	tags=17%, list=9%, signal=19%
GO_ESTABLISHMENT_OF_PROTEIN_LOCALIZATION_TO_VACUOLE	GO_ESTABLISHMENT_OF_PROTEIN_LOCALIZATION_TO_VACUOLE		30	0.438572	1.3807	0.121649	0.951227	1	3154	tags=47%, list=18%, signal=57%
GO_EPIDERMAL_GROWTH_FACTOR_RECEPTOR_BINDING	GO_EPIDERMAL_GROWTH_FACTOR_RECEPTOR_BINDING		30	0.394473	1.38042	0.0828402	0.948164	1	2314	tags=27%, list=13%, signal=31%
GO_ANDROGEN_RECEPTOR_BINDING	GO_ANDROGEN_RECEPTOR_BINDING		39	0.378452	1.3792	0.0896414	0.949081	1	3646	tags=36%, list=21%, signal=45%
GO_CHROMOSOME_TELOMERIC_REGION	GO_CHROMOSOME_TELOMERIC_REGION		148	0.410277	1.37914	0.148893	0.94493	1	4301	tags=53%, list=24%, signal=69%
GO_GOLGI_ASSOCIATED_VESICLE_MEMBRANE	GO_GOLGI_ASSOCIATED_VESICLE_MEMBRANE		46	0.356638	1.37851	0.0877193	0.943689	1	3852	tags=39%, list=22%, signal=50%
GO_NUCLEAR_CHROMOSOME_TELOMERIC_REGION	GO_NUCLEAR_CHROMOSOME_TELOMERIC_REGION		121	0.418972	1.37778	0.156	0.942679	1	3133	tags=45%, list=18%, signal=54%
GO_GOLGI_ASSOCIATED_VESICLE	GO_GOLGI_ASSOCIATED_VESICLE		77	0.326661	1.3776	0.08	0.939194	1	3199	tags=30%, list=18%, signal=36%
GO_REGULATION_OF_NITRIC_OXIDE_SYNTHASE_BIOSYNTHETIC_PROCESS	GO_REGULATION_OF_NITRIC_OXIDE_SYNTHASE_BIOSYNTHETIC_PROCESS		18	0.458721	1.37548	0.112474	0.944493	1	3857	tags=33%, list=22%, signal=43%
GO_POSITIVE_REGULATION_OF_TELOMERE_MAINTENANCE	GO_POSITIVE_REGULATION_OF_TELOMERE_MAINTENANCE		44	0.40299	1.37395	0.131737	0.947402	1	3646	tags=41%, list=21%, signal=51%
GO_COPI_COATED_VESICLE	GO_COPI_COATED_VESICLE		22	0.4624	1.37119	0.101533	0.955518	1	3199	tags=45%, list=18%, signal=55%
GO_NEGATIVE_REGULATION_OF_STRESS_ACTIVATED_PROTEIN_KINASE_SIGNALING_CASCADE	GO_NEGATIVE_REGULATION_OF_STRESS_ACTIVATED_PROTEIN_KINASE_SIGNALING_CASCADE		40	0.363833	1.36846	0.0783939	0.963736	1	3712	tags=40%, list=21%, signal=51%
GO_REGULATION_OF_DNA_TEMPLATED_TRANSCRIPTION_IN_RESPONSE_TO_STRESS	GO_REGULATION_OF_DNA_TEMPLATED_TRANSCRIPTION_IN_RESPONSE_TO_STRESS		63	0.333211	1.36828	0.0892495	0.960202	1	1539	tags=19%, list=9%, signal=21%
GO_OXIDOREDUCTASE_ACTIVITY_ACTING_ON_THE_ALDEHYDE_OR_OXO_GROUP_OF_DONORS	GO_OXIDOREDUCTASE_ACTIVITY_ACTING_ON_THE_ALDEHYDE_OR_OXO_GROUP_OF_DONORS		41	0.413808	1.3652	0.103175	0.970323	1	4242	tags=34%, list=24%, signal=45%
GO_TRANSLATION_REGULATOR_ACTIVITY_NUCLEIC_ACID_BINDING	GO_TRANSLATION_REGULATOR_ACTIVITY_NUCLEIC_ACID_BINDING		18	0.482675	1.36496	0.112245	0.966946	1	2170	tags=33%, list=12%, signal=38%
GO_REGULATION_OF_ERAD_PATHWAY	GO_REGULATION_OF_ERAD_PATHWAY		26	0.397215	1.36453	0.0981595	0.964495	1	2489	tags=38%, list=14%, signal=45%
GO_PROTEIN_FOLDING	GO_PROTEIN_FOLDING		193	0.349326	1.36406	0.120408	0.962246	1	3842	tags=33%, list=22%, signal=42%
GO_NEGATIVE_REGULATION_OF_DNA_RECOMBINATION	GO_NEGATIVE_REGULATION_OF_DNA_RECOMBINATION		15	0.513965	1.36256	0.130522	0.96498	1	4623	tags=67%, list=26%, signal=90%
GO_MIDBODY	GO_MIDBODY		121	0.320287	1.36124	0.110672	0.96687	1	3593	tags=36%, list=20%, signal=45%
GO_ALCOHOL_BIOSYNTHETIC_PROCESS	GO_ALCOHOL_BIOSYNTHETIC_PROCESS		105	0.340844	1.36039	0.112	0.966651	1	2671	tags=27%, list=15%, signal=31%
GO_MITOTIC_NUCLEAR_DIVISION	GO_MITOTIC_NUCLEAR_DIVISION		337	0.367541	1.35981	0.14959	0.965149	1	3644	tags=40%, list=21%, signal=50%
GO_CELL_PROJECTION_ASSEMBLY	GO_CELL_PROJECTION_ASSEMBLY		241	0.302845	1.35979	0.0696721	0.961041	1	3226	tags=27%, list=18%, signal=32%
GO_NUCLEOTIDE_EXCISION_REPAIR_PREINCISION_COMPLEX_ASSEMBLY	GO_NUCLEOTIDE_EXCISION_REPAIR_PREINCISION_COMPLEX_ASSEMBLY		29	0.467067	1.35868	0.153696	0.961795	1	3892	tags=48%, list=22%, signal=62%
GO_ORGANELLE_LOCALIZATION	GO_ORGANELLE_LOCALIZATION		391	0.27601	1.35828	0.0451866	0.95953	1	2869	tags=23%, list=16%, signal=27%
GO_MODULATION_BY_SYMBIONT_OF_HOST_CELLULAR_PROCESS	GO_MODULATION_BY_SYMBIONT_OF_HOST_CELLULAR_PROCESS		27	0.41378	1.35757	0.125506	0.958738	1	2447	tags=26%, list=14%, signal=30%
GO_POSITIVE_REGULATION_OF_MITOTIC_CELL_CYCLE	GO_POSITIVE_REGULATION_OF_MITOTIC_CELL_CYCLE		118	0.324254	1.35669	0.0940695	0.958596	1	3209	tags=31%, list=18%, signal=37%
GO_HISTONE_MRNA_METABOLIC_PROCESS	GO_HISTONE_MRNA_METABOLIC_PROCESS		28	0.472716	1.35665	0.173828	0.954675	1	3539	tags=50%, list=20%, signal=62%
GO_BICELLULAR_TIGHT_JUNCTION_ASSEMBLY	GO_BICELLULAR_TIGHT_JUNCTION_ASSEMBLY		30	0.400775	1.3562	0.118367	0.952712	1	1939	tags=33%, list=11%, signal=37%
GO_ORGANELLE_FISSION	GO_ORGANELLE_FISSION		440	0.349896	1.35581	0.134855	0.950484	1	3797	tags=38%, list=22%, signal=47%
GO_CELLULAR_RESPONSE_TO_LEPTIN_STIMULUS	GO_CELLULAR_RESPONSE_TO_LEPTIN_STIMULUS		16	0.465782	1.3501	0.113924	0.971703	1	2731	tags=38%, list=15%, signal=44%
GO_ANDROGEN_METABOLIC_PROCESS	GO_ANDROGEN_METABOLIC_PROCESS		30	0.396588	1.34939	0.118236	0.970833	1	5252	tags=47%, list=30%, signal=66%
GO_ISOTYPE_SWITCHING	GO_ISOTYPE_SWITCHING		16	0.488667	1.34809	0.132231	0.972643	1	3872	tags=44%, list=22%, signal=56%
GO_RNA_POLYMERASE_CORE_ENZYME_BINDING	GO_RNA_POLYMERASE_CORE_ENZYME_BINDING		19	0.466741	1.34787	0.13834	0.969587	1	4368	tags=63%, list=25%, signal=84%
GO_NON_RECOMBINATIONAL_REPAIR	GO_NON_RECOMBINATIONAL_REPAIR		65	0.442891	1.34701	0.177645	0.969679	1	3845	tags=51%, list=22%, signal=65%
GO_TRANSFERASE_COMPLEX_TRANSFERRING_PHOSPHORUS_CONTAINING_GROUPS	GO_TRANSFERASE_COMPLEX_TRANSFERRING_PHOSPHORUS_CONTAINING_GROUPS		229	0.310384	1.346	0.0893971	0.970109	1	4637	tags=43%, list=26%, signal=58%
GO_CILIARY_BASAL_BODY	GO_CILIARY_BASAL_BODY		74	0.35101	1.34512	0.108652	0.970282	1	2860	tags=30%, list=16%, signal=35%
GO_SISTER_CHROMATID_SEGREGATION	GO_SISTER_CHROMATID_SEGREGATION		161	0.428816	1.34437	0.215726	0.969689	1	3128	tags=43%, list=18%, signal=52%
GO_AXON_CYTOPLASM	GO_AXON_CYTOPLASM		29	0.376191	1.34411	0.0901961	0.966922	1	1329	tags=24%, list=8%, signal=26%
GO_ASPARTATE_FAMILY_AMINO_ACID_BIOSYNTHETIC_PROCESS	GO_ASPARTATE_FAMILY_AMINO_ACID_BIOSYNTHETIC_PROCESS		22	0.478074	1.34391	0.145418	0.963864	1	3496	tags=50%, list=20%, signal=62%
GO_METAPHASE_PLATE_CONGRESSION	GO_METAPHASE_PLATE_CONGRESSION		41	0.440973	1.34346	0.174699	0.962012	1	2564	tags=41%, list=15%, signal=48%
GO_REGULATION_OF_CELL_CYCLE_G2_M_PHASE_TRANSITION	GO_REGULATION_OF_CELL_CYCLE_G2_M_PHASE_TRANSITION		57	0.348371	1.3433	0.107356	0.958917	1	3539	tags=33%, list=20%, signal=42%
GO_DNA_DIRECTED_RNA_POLYMERASE_II_HOLOENZYME	GO_DNA_DIRECTED_RNA_POLYMERASE_II_HOLOENZYME		92	0.364166	1.34317	0.135081	0.955602	1	3880	tags=45%, list=22%, signal=57%
GO_NEGATIVE_REGULATION_OF_MITOTIC_NUCLEAR_DIVISION	GO_NEGATIVE_REGULATION_OF_MITOTIC_NUCLEAR_DIVISION		32	0.44638	1.34304	0.179226	0.95241	1	4546	tags=63%, list=26%, signal=84%
GO_FC_RECEPTOR_SIGNALING_PATHWAY	GO_FC_RECEPTOR_SIGNALING_PATHWAY		182	0.318966	1.34247	0.120482	0.951076	1	2463	tags=24%, list=14%, signal=27%
GO_REGULATION_OF_CYTOKINESIS	GO_REGULATION_OF_CYTOKINESIS		54	0.371625	1.34065	0.134146	0.955224	1	3059	tags=35%, list=17%, signal=42%
GO_ESTABLISHMENT_OF_MITOCHONDRION_LOCALIZATION	GO_ESTABLISHMENT_OF_MITOCHONDRION_LOCALIZATION		15	0.45219	1.3394	0.11811	0.956847	1	1308	tags=27%, list=7%, signal=29%
GO_NUCLEAR_BODY	GO_NUCLEAR_BODY		333	0.303653	1.33821	0.12	0.958589	1	3602	tags=32%, list=20%, signal=40%
GO_ERROR_PRONE_TRANSLESION_SYNTHESIS	GO_ERROR_PRONE_TRANSLESION_SYNTHESIS		19	0.52243	1.3381	0.199203	0.955352	1	3892	tags=58%, list=22%, signal=74%
GO_REGULATION_OF_GENE_EXPRESSION_EPIGENETIC	GO_REGULATION_OF_GENE_EXPRESSION_EPIGENETIC		201	0.355983	1.33792	0.150685	0.952412	1	3661	tags=40%, list=21%, signal=50%
GO_HISTONE_ACETYLTRANSFERASE_BINDING	GO_HISTONE_ACETYLTRANSFERASE_BINDING		28	0.415875	1.33764	0.152918	0.949877	1	3310	tags=36%, list=19%, signal=44%
GO_REGULATION_OF_CELLULAR_PROTEIN_CATABOLIC_PROCESS	GO_REGULATION_OF_CELLULAR_PROTEIN_CATABOLIC_PROCESS		262	0.305395	1.33691	0.139489	0.949431	1	2185	tags=25%, list=12%, signal=28%
GO_NUCLEAR_TRANSPORT	GO_NUCLEAR_TRANSPORT		339	0.292803	1.33688	0.098	0.945929	1	3517	tags=29%, list=20%, signal=36%
GO_THIOL_DEPENDENT_UBIQUITIN_SPECIFIC_PROTEASE_ACTIVITY	GO_THIOL_DEPENDENT_UBIQUITIN_SPECIFIC_PROTEASE_ACTIVITY		68	0.360159	1.33602	0.115385	0.946236	1	3699	tags=40%, list=21%, signal=50%
GO_GENE_SILENCING	GO_GENE_SILENCING		178	0.375315	1.33461	0.177062	0.948771	1	3603	tags=43%, list=20%, signal=53%
GO_PROTEIN_TARGETING	GO_PROTEIN_TARGETING		386	0.322515	1.33349	0.161479	0.950043	1	4015	tags=35%, list=23%, signal=45%
GO_LAMIN_BINDING	GO_LAMIN_BINDING		17	0.426301	1.33343	0.126556	0.94663	1	2070	tags=35%, list=12%, signal=40%
GO_SCF_DEPENDENT_PROTEASOMAL_UBIQUITIN_DEPENDENT_PROTEIN_CATABOLIC_PROCESS	GO_SCF_DEPENDENT_PROTEASOMAL_UBIQUITIN_DEPENDENT_PROTEIN_CATABOLIC_PROCESS		23	0.408219	1.33216	0.125	0.948773	1	2856	tags=30%, list=16%, signal=36%
GO_CENTRIOLAR_SATELLITE	GO_CENTRIOLAR_SATELLITE		24	0.436774	1.33201	0.141732	0.945879	1	5263	tags=54%, list=30%, signal=77%
GO_POSITIVE_REGULATION_OF_TELOMERE_MAINTENANCE_VIA_TELOMERE_LENGTHENING	GO_POSITIVE_REGULATION_OF_TELOMERE_MAINTENANCE_VIA_TELOMERE_LENGTHENING		32	0.430579	1.33173	0.176938	0.943552	1	2693	tags=38%, list=15%, signal=44%
GO_POSITIVE_REGULATION_OF_CATABOLIC_PROCESS	GO_POSITIVE_REGULATION_OF_CATABOLIC_PROCESS		381	0.269146	1.33033	0.0781893	0.9461	1	2159	tags=20%, list=12%, signal=23%
GO_DEPHOSPHORYLATION	GO_DEPHOSPHORYLATION		258	0.271112	1.32911	0.0536779	0.94796	1	2142	tags=19%, list=12%, signal=21%
GO_NUCLEAR_EUCHROMATIN	GO_NUCLEAR_EUCHROMATIN		23	0.423763	1.32873	0.142857	0.946002	1	3646	tags=43%, list=21%, signal=55%
GO_POSTTRANSCRIPTIONAL_REGULATION_OF_GENE_EXPRESSION	GO_POSTTRANSCRIPTIONAL_REGULATION_OF_GENE_EXPRESSION		413	0.296428	1.32861	0.126984	0.943102	1	2775	tags=23%, list=16%, signal=27%
GO_REGULATION_OF_CELL_DIVISION	GO_REGULATION_OF_CELL_DIVISION		246	0.294995	1.32833	0.103586	0.940798	1	3368	tags=28%, list=19%, signal=35%
GO_POSITIVE_REGULATION_OF_PROTEASOMAL_PROTEIN_CATABOLIC_PROCESS	GO_POSITIVE_REGULATION_OF_PROTEASOMAL_PROTEIN_CATABOLIC_PROCESS		95	0.310051	1.32608	0.0975104	0.946803	1	2159	tags=27%, list=12%, signal=31%
GO_NEGATIVE_REGULATION_OF_TELOMERE_MAINTENANCE	GO_NEGATIVE_REGULATION_OF_TELOMERE_MAINTENANCE		26	0.407874	1.32477	0.136095	0.949163	1	3539	tags=46%, list=20%, signal=58%
GO_NUCLEOTIDE_SUGAR_METABOLIC_PROCESS	GO_NUCLEOTIDE_SUGAR_METABOLIC_PROCESS		33	0.39194	1.32388	0.151923	0.949466	1	2393	tags=33%, list=14%, signal=38%
GO_SNARE_COMPLEX	GO_SNARE_COMPLEX		52	0.349199	1.32278	0.121514	0.950788	1	3166	tags=35%, list=18%, signal=42%
GO_POSITIVE_REGULATION_OF_CHROMOSOME_SEGREGATION	GO_POSITIVE_REGULATION_OF_CHROMOSOME_SEGREGATION		23	0.464914	1.32265	0.18591	0.94787	1	2079	tags=43%, list=12%, signal=49%
GO_POSTREPLICATION_REPAIR	GO_POSTREPLICATION_REPAIR		48	0.416507	1.32241	0.187008	0.945645	1	4130	tags=48%, list=23%, signal=62%
GO_PROTEIN_LOCALIZATION_TO_CHROMOSOME	GO_PROTEIN_LOCALIZATION_TO_CHROMOSOME		37	0.412535	1.32147	0.167677	0.94618	1	3363	tags=43%, list=19%, signal=53%
GO_ATP_DEPENDENT_MICROTUBULE_MOTOR_ACTIVITY	GO_ATP_DEPENDENT_MICROTUBULE_MOTOR_ACTIVITY		18	0.460441	1.32074	0.132411	0.94586	1	2472	tags=33%, list=14%, signal=39%
GO_SISTER_CHROMATID_COHESION	GO_SISTER_CHROMATID_COHESION		98	0.454761	1.3205	0.217391	0.943502	1	3221	tags=46%, list=18%, signal=56%
GO_CYCLIN_DEPENDENT_PROTEIN_KINASE_HOLOENZYME_COMPLEX	GO_CYCLIN_DEPENDENT_PROTEIN_KINASE_HOLOENZYME_COMPLEX		30	0.396038	1.31997	0.132554	0.942492	1	4583	tags=47%, list=26%, signal=63%
GO_CELL_CYCLE_G2_M_PHASE_TRANSITION	GO_CELL_CYCLE_G2_M_PHASE_TRANSITION		134	0.341304	1.31992	0.145749	0.939379	1	4636	tags=47%, list=26%, signal=63%
GO_CYTOPLASMIC_MICROTUBULE_ORGANIZATION	GO_CYTOPLASMIC_MICROTUBULE_ORGANIZATION		39	0.359645	1.31983	0.109731	0.936449	1	2029	tags=28%, list=11%, signal=32%
GO_PROTEIN_LOCALIZATION_TO_VACUOLE	GO_PROTEIN_LOCALIZATION_TO_VACUOLE		42	0.38993	1.31943	0.145263	0.934811	1	3589	tags=45%, list=20%, signal=57%
GO_EUCHROMATIN	GO_EUCHROMATIN		30	0.388819	1.31853	0.125245	0.93541	1	3646	tags=37%, list=21%, signal=46%
GO_CELL_CYCLE_PHASE_TRANSITION	GO_CELL_CYCLE_PHASE_TRANSITION		247	0.347981	1.31827	0.168033	0.93323	1	3983	tags=40%, list=23%, signal=51%
GO_REGULATION_OF_PROTEIN_CATABOLIC_PROCESS	GO_REGULATION_OF_PROTEIN_CATABOLIC_PROCESS		376	0.277245	1.31808	0.128906	0.930818	1	3135	tags=27%, list=18%, signal=33%
GO_CELL_CYCLE_G1_S_PHASE_TRANSITION	GO_CELL_CYCLE_G1_S_PHASE_TRANSITION		107	0.399516	1.3172	0.1893	0.93118	1	4273	tags=46%, list=24%, signal=60%
GO_ATP_DEPENDENT_CHROMATIN_REMODELING	GO_ATP_DEPENDENT_CHROMATIN_REMODELING		66	0.425484	1.31606	0.204409	0.932718	1	3177	tags=45%, list=18%, signal=55%
GO_TRICARBOXYLIC_ACID_METABOLIC_PROCESS	GO_TRICARBOXYLIC_ACID_METABOLIC_PROCESS		36	0.454114	1.31587	0.203846	0.930371	1	2848	tags=39%, list=16%, signal=46%
GO_PHOSPHOTRANSFERASE_ACTIVITY_PHOSPHATE_GROUP_AS_ACCEPTOR	GO_PHOSPHOTRANSFERASE_ACTIVITY_PHOSPHATE_GROUP_AS_ACCEPTOR		37	0.35818	1.31563	0.116601	0.928215	1	2870	tags=24%, list=16%, signal=29%
GO_REGULATION_OF_AUTOPHAGOSOME_ASSEMBLY	GO_REGULATION_OF_AUTOPHAGOSOME_ASSEMBLY		34	0.365412	1.31517	0.125249	0.927031	1	1612	tags=24%, list=9%, signal=26%
GO_EARLY_ENDOSOME_MEMBRANE	GO_EARLY_ENDOSOME_MEMBRANE		101	0.316496	1.31472	0.100418	0.9257	1	1789	tags=21%, list=10%, signal=23%
GO_DNA_REPLICATION_FACTOR_A_COMPLEX	GO_DNA_REPLICATION_FACTOR_A_COMPLEX		15	0.491409	1.31394	0.183071	0.925818	1	3881	tags=60%, list=22%, signal=77%
GO_POSITIVE_REGULATION_OF_RESPONSE_TO_DNA_DAMAGE_STIMULUS	GO_POSITIVE_REGULATION_OF_RESPONSE_TO_DNA_DAMAGE_STIMULUS		58	0.33746	1.31383	0.118199	0.923177	1	2898	tags=28%, list=16%, signal=33%
GO_STRAND_DISPLACEMENT	GO_STRAND_DISPLACEMENT		25	0.533277	1.31373	0.219561	0.920415	1	3920	tags=60%, list=22%, signal=77%
GO_CONDENSED_CHROMOSOME	GO_CONDENSED_CHROMOSOME		166	0.400923	1.31322	0.216867	0.91942	1	3244	tags=39%, list=18%, signal=47%
GO_PROTEIN_STABILIZATION	GO_PROTEIN_STABILIZATION		124	0.285545	1.31236	0.10757	0.919916	1	2686	tags=26%, list=15%, signal=30%
GO_REGULATION_OF_PROTEIN_STABILITY	GO_REGULATION_OF_PROTEIN_STABILITY		208	0.278874	1.31118	0.0865191	0.921415	1	2686	tags=25%, list=15%, signal=29%
GO_NEGATIVE_REGULATION_OF_TRANSLATIONAL_INITIATION	GO_NEGATIVE_REGULATION_OF_TRANSLATIONAL_INITIATION		20	0.439304	1.31103	0.170923	0.918977	1	1721	tags=25%, list=10%, signal=28%
GO_RESPONSE_TO_LEPTIN	GO_RESPONSE_TO_LEPTIN		20	0.40923	1.31027	0.122917	0.919059	1	2731	tags=30%, list=15%, signal=35%
GO_NUCLEOTIDE_EXCISION_REPAIR_PREINCISION_COMPLEX_STABILIZATION	GO_NUCLEOTIDE_EXCISION_REPAIR_PREINCISION_COMPLEX_STABILIZATION		21	0.457163	1.30922	0.183752	0.920219	1	3881	tags=48%, list=22%, signal=61%
GO_OXIDOREDUCTASE_ACTIVITY_ACTING_ON_THE_ALDEHYDE_OR_OXO_GROUP_OF_DONORS_NAD_OR_NADP_AS_ACCEPTOR	GO_OXIDOREDUCTASE_ACTIVITY_ACTING_ON_THE_ALDEHYDE_OR_OXO_GROUP_OF_DONORS_NAD_OR_NADP_AS_ACCEPTOR		33	0.415302	1.30591	0.142578	0.930983	1	4242	tags=36%, list=24%, signal=48%
GO_REGULATION_OF_ESTABLISHMENT_OF_PROTEIN_LOCALIZATION_TO_PLASMA_MEMBRANE	GO_REGULATION_OF_ESTABLISHMENT_OF_PROTEIN_LOCALIZATION_TO_PLASMA_MEMBRANE		46	0.338042	1.30585	0.11332	0.928186	1	1504	tags=24%, list=9%, signal=26%
GO_ER_TO_GOLGI_TRANSPORT_VESICLE_MEMBRANE	GO_ER_TO_GOLGI_TRANSPORT_VESICLE_MEMBRANE		51	0.410801	1.3043	0.195876	0.931583	1	2586	tags=27%, list=15%, signal=32%
GO_ENDOPLASMIC_RETICULUM_SUBCOMPARTMENT	GO_ENDOPLASMIC_RETICULUM_SUBCOMPARTMENT		15	0.43938	1.30367	0.155945	0.931114	1	213	tags=20%, list=1%, signal=20%
GO_POLYSACCHARIDE_CATABOLIC_PROCESS	GO_POLYSACCHARIDE_CATABOLIC_PROCESS		23	0.408246	1.30196	0.163968	0.935175	1	1250	tags=22%, list=7%, signal=23%
GO_REGULATION_OF_DNA_RECOMBINATION	GO_REGULATION_OF_DNA_RECOMBINATION		51	0.357228	1.30165	0.176817	0.93345	1	3920	tags=35%, list=22%, signal=45%
GO_TASTE_RECEPTOR_ACTIVITY	GO_TASTE_RECEPTOR_ACTIVITY		19	0.579956	1.30005	0.217822	0.936971	1	3704	tags=58%, list=21%, signal=73%
GO_PERICENTRIOLAR_MATERIAL	GO_PERICENTRIOLAR_MATERIAL		18	0.494676	1.29938	0.197211	0.936884	1	3757	tags=56%, list=21%, signal=70%
GO_INTRACILIARY_TRANSPORT_PARTICLE	GO_INTRACILIARY_TRANSPORT_PARTICLE		29	0.45441	1.29919	0.1841	0.934629	1	2924	tags=38%, list=17%, signal=45%
GO_MITOTIC_CELL_CYCLE_CHECKPOINT	GO_MITOTIC_CELL_CYCLE_CHECKPOINT		129	0.344186	1.2986	0.181435	0.933941	1	3939	tags=40%, list=22%, signal=52%
GO_CYTOSKELETON_DEPENDENT_INTRACELLULAR_TRANSPORT	GO_CYTOSKELETON_DEPENDENT_INTRACELLULAR_TRANSPORT		109	0.302462	1.29798	0.108384	0.933506	1	3644	tags=31%, list=21%, signal=39%
GO_ATPASE_BINDING	GO_ATPASE_BINDING		72	0.317278	1.29795	0.11306	0.930628	1	2118	tags=24%, list=12%, signal=27%
GO_TRANSCRIPTIONAL_REPRESSOR_COMPLEX	GO_TRANSCRIPTIONAL_REPRESSOR_COMPLEX		73	0.321194	1.29762	0.116466	0.929046	1	2675	tags=27%, list=15%, signal=32%
GO_REGULATION_OF_DNA_REPAIR	GO_REGULATION_OF_DNA_REPAIR		68	0.350453	1.29675	0.140562	0.929685	1	3780	tags=35%, list=21%, signal=45%
GO_GOLGI_STACK	GO_GOLGI_STACK		118	0.303819	1.29669	0.130097	0.926931	1	2559	tags=25%, list=14%, signal=29%
GO_POSITIVE_REGULATION_OF_RESPONSE_TO_EXTRACELLULAR_STIMULUS	GO_POSITIVE_REGULATION_OF_RESPONSE_TO_EXTRACELLULAR_STIMULUS		47	0.353353	1.29549	0.135189	0.928626	1	2070	tags=23%, list=12%, signal=26%
GO_CIRCADIAN_REGULATION_OF_GENE_EXPRESSION	GO_CIRCADIAN_REGULATION_OF_GENE_EXPRESSION		51	0.331741	1.29539	0.135189	0.926123	1	3599	tags=39%, list=20%, signal=49%
GO_VESICLE_DOCKING	GO_VESICLE_DOCKING		54	0.331817	1.29509	0.139394	0.924453	1	3166	tags=30%, list=18%, signal=36%
GO_PROTEIN_N_TERMINUS_BINDING	GO_PROTEIN_N_TERMINUS_BINDING		101	0.289643	1.29413	0.100791	0.925401	1	3561	tags=33%, list=20%, signal=41%
GO_NEGATIVE_REGULATION_OF_CHROMOSOME_SEGREGATION	GO_NEGATIVE_REGULATION_OF_CHROMOSOME_SEGREGATION		25	0.46473	1.29412	0.215886	0.922566	1	4546	tags=68%, list=26%, signal=91%
GO_RETROGRADE_VESICLE_MEDIATED_TRANSPORT_GOLGI_TO_ER	GO_RETROGRADE_VESICLE_MEDIATED_TRANSPORT_GOLGI_TO_ER		75	0.347213	1.29341	0.15121	0.922591	1	2720	tags=33%, list=15%, signal=39%
GO_NEGATIVE_REGULATION_OF_POTASSIUM_ION_TRANSMEMBRANE_TRANSPORTER_ACTIVITY	GO_NEGATIVE_REGULATION_OF_POTASSIUM_ION_TRANSMEMBRANE_TRANSPORTER_ACTIVITY		15	0.479113	1.29158	0.167002	0.926746	1	5576	tags=60%, list=32%, signal=88%
GO_CYCLIN_DEPENDENT_PROTEIN_SERINE_THREONINE_KINASE_REGULATOR_ACTIVITY	GO_CYCLIN_DEPENDENT_PROTEIN_SERINE_THREONINE_KINASE_REGULATOR_ACTIVITY		27	0.395962	1.29072	0.175542	0.927263	1	3204	tags=33%, list=18%, signal=41%
GO_ORGANELLE_SUBCOMPARTMENT	GO_ORGANELLE_SUBCOMPARTMENT		291	0.273949	1.29067	0.10041	0.924675	1	2606	tags=22%, list=15%, signal=25%
GO_PROTEIN_SUMOYLATION	GO_PROTEIN_SUMOYLATION		112	0.365015	1.29009	0.17732	0.924293	1	3947	tags=46%, list=22%, signal=58%
GO_PURINE_NUCLEOBASE_METABOLIC_PROCESS	GO_PURINE_NUCLEOBASE_METABOLIC_PROCESS		19	0.474491	1.2892	0.196464	0.924986	1	5570	tags=63%, list=32%, signal=92%
GO_REGULATION_OF_CENTROSOME_CYCLE	GO_REGULATION_OF_CENTROSOME_CYCLE		38	0.42686	1.2888	0.205645	0.923809	1	3235	tags=45%, list=18%, signal=55%
GO_N_TERMINAL_PROTEIN_AMINO_ACID_MODIFICATION	GO_N_TERMINAL_PROTEIN_AMINO_ACID_MODIFICATION		24	0.391984	1.2888	0.168651	0.921028	1	2600	tags=38%, list=15%, signal=44%
GO_UBIQUITIN_DEPENDENT_PROTEIN_CATABOLIC_PROCESS_VIA_THE_MULTIVESICULAR_BODY_SORTING_PATHWAY	GO_UBIQUITIN_DEPENDENT_PROTEIN_CATABOLIC_PROCESS_VIA_THE_MULTIVESICULAR_BODY_SORTING_PATHWAY		16	0.439325	1.28865	0.187123	0.918767	1	1337	tags=38%, list=8%, signal=41%
GO_EXONUCLEASE_ACTIVITY	GO_EXONUCLEASE_ACTIVITY		70	0.372135	1.28753	0.21165	0.920531	1	4221	tags=44%, list=24%, signal=58%
GO_AMINO_ACID_ACTIVATION	GO_AMINO_ACID_ACTIVATION		51	0.44937	1.28627	0.223092	0.922954	1	3943	tags=47%, list=22%, signal=60%
GO_NEGATIVE_REGULATION_OF_MITOTIC_CELL_CYCLE	GO_NEGATIVE_REGULATION_OF_MITOTIC_CELL_CYCLE		183	0.299825	1.28538	0.147773	0.923678	1	3939	tags=36%, list=22%, signal=46%
GO_PEPTIDYL_CYSTEINE_MODIFICATION	GO_PEPTIDYL_CYSTEINE_MODIFICATION		20	0.407588	1.28399	0.144487	0.92634	1	3202	tags=30%, list=18%, signal=37%
GO_NUCLEOCYTOPLASMIC_TRANSPORTER_ACTIVITY	GO_NUCLEOCYTOPLASMIC_TRANSPORTER_ACTIVITY		23	0.499092	1.28379	0.242857	0.924396	1	3581	tags=57%, list=20%, signal=71%
GO_REGULATION_OF_PROTEIN_MODIFICATION_BY_SMALL_PROTEIN_CONJUGATION_OR_REMOVAL	GO_REGULATION_OF_PROTEIN_MODIFICATION_BY_SMALL_PROTEIN_CONJUGATION_OR_REMOVAL		265	0.293182	1.28378	0.166667	0.921669	1	2193	tags=22%, list=12%, signal=24%
GO_PROTEIN_LOCALIZATION_TO_CYTOSKELETON	GO_PROTEIN_LOCALIZATION_TO_CYTOSKELETON		28	0.388069	1.28364	0.183099	0.919507	1	3099	tags=36%, list=18%, signal=43%
GO_NUCLEOID	GO_NUCLEOID		39	0.455781	1.28277	0.239437	0.920083	1	1891	tags=36%, list=11%, signal=40%
GO_KINASE_REGULATOR_ACTIVITY	GO_KINASE_REGULATOR_ACTIVITY		178	0.264464	1.28209	0.0857143	0.920006	1	3771	tags=30%, list=21%, signal=38%
GO_MEMBRANE_DOCKING	GO_MEMBRANE_DOCKING		65	0.321919	1.28158	0.154762	0.919314	1	3166	tags=28%, list=18%, signal=34%
GO_DNA_REPLICATION_INDEPENDENT_NUCLEOSOME_ORGANIZATION	GO_DNA_REPLICATION_INDEPENDENT_NUCLEOSOME_ORGANIZATION		47	0.473304	1.28094	0.263581	0.919095	1	2932	tags=49%, list=17%, signal=59%
GO_ESTABLISHMENT_OF_PROTEIN_LOCALIZATION_TO_ORGANELLE	GO_ESTABLISHMENT_OF_PROTEIN_LOCALIZATION_TO_ORGANELLE		344	0.326862	1.2809	0.219844	0.916608	1	4015	tags=35%, list=23%, signal=44%
GO_SPINDLE_POLE	GO_SPINDLE_POLE		112	0.342279	1.28033	0.204724	0.916077	1	2677	tags=33%, list=15%, signal=39%
GO_SPINDLE	GO_SPINDLE		265	0.308791	1.28032	0.172	0.913489	1	3663	tags=35%, list=21%, signal=44%
GO_SUBSTANTIA_NIGRA_DEVELOPMENT	GO_SUBSTANTIA_NIGRA_DEVELOPMENT		44	0.363642	1.27877	0.189453	0.916733	1	3022	tags=30%, list=17%, signal=36%
GO_REGULATION_OF_CENTROSOME_DUPLICATION	GO_REGULATION_OF_CENTROSOME_DUPLICATION		31	0.416985	1.27873	0.186235	0.914228	1	3975	tags=52%, list=23%, signal=66%
GO_ASPARTATE_FAMILY_AMINO_ACID_METABOLIC_PROCESS	GO_ASPARTATE_FAMILY_AMINO_ACID_METABOLIC_PROCESS		51	0.369538	1.27842	0.188825	0.912768	1	3579	tags=33%, list=20%, signal=42%
GO_POSITIVE_REGULATION_OF_DNA_REPAIR	GO_POSITIVE_REGULATION_OF_DNA_REPAIR		33	0.38458	1.27751	0.178236	0.913567	1	3780	tags=33%, list=21%, signal=42%
GO_POSITIVE_REGULATION_OF_LIGASE_ACTIVITY	GO_POSITIVE_REGULATION_OF_LIGASE_ACTIVITY		105	0.406661	1.27716	0.256461	0.912313	1	1988	tags=30%, list=11%, signal=34%
GO_POSITIVE_REGULATION_OF_CELLULAR_PROTEIN_CATABOLIC_PROCESS	GO_POSITIVE_REGULATION_OF_CELLULAR_PROTEIN_CATABOLIC_PROCESS		185	0.314444	1.27705	0.190196	0.910105	1	2159	tags=25%, list=12%, signal=28%
GO_DNA_REPAIR_COMPLEX	GO_DNA_REPAIR_COMPLEX		37	0.409692	1.27673	0.213849	0.908832	1	3872	tags=41%, list=22%, signal=52%
GO_1_PHOSPHATIDYLINOSITOL_BINDING	GO_1_PHOSPHATIDYLINOSITOL_BINDING		19	0.475096	1.27579	0.222222	0.909735	1	4754	tags=68%, list=27%, signal=94%
GO_REGULATION_OF_GLUCOSE_TRANSPORT	GO_REGULATION_OF_GLUCOSE_TRANSPORT		91	0.296755	1.27481	0.128631	0.910915	1	3197	tags=30%, list=18%, signal=36%
GO_MITOTIC_DNA_INTEGRITY_CHECKPOINT	GO_MITOTIC_DNA_INTEGRITY_CHECKPOINT		93	0.338104	1.27447	0.184049	0.909516	1	3939	tags=40%, list=22%, signal=51%
GO_PHOSPHOLIPID_BIOSYNTHETIC_PROCESS	GO_PHOSPHOLIPID_BIOSYNTHETIC_PROCESS		223	0.266893	1.27344	0.0950495	0.910971	1	3094	tags=26%, list=18%, signal=32%
GO_REGULATION_OF_PROTEIN_EXPORT_FROM_NUCLEUS	GO_REGULATION_OF_PROTEIN_EXPORT_FROM_NUCLEUS		33	0.357293	1.27308	0.150794	0.909738	1	1602	tags=24%, list=9%, signal=27%
GO_DNA_TEMPLATED_TRANSCRIPTION_INITIATION	GO_DNA_TEMPLATED_TRANSCRIPTION_INITIATION		197	0.285664	1.27304	0.124248	0.907377	1	3571	tags=34%, list=20%, signal=42%
GO_POLYUBIQUITIN_BINDING	GO_POLYUBIQUITIN_BINDING		38	0.343378	1.27245	0.156057	0.907093	1	1716	tags=29%, list=10%, signal=32%
GO_ER_ASSOCIATED_UBIQUITIN_DEPENDENT_PROTEIN_CATABOLIC_PROCESS	GO_ER_ASSOCIATED_UBIQUITIN_DEPENDENT_PROTEIN_CATABOLIC_PROCESS		59	0.340035	1.27181	0.196296	0.907148	1	3649	tags=41%, list=21%, signal=51%
GO_MULTI_ORGANISM_LOCALIZATION	GO_MULTI_ORGANISM_LOCALIZATION		65	0.37833	1.27175	0.207317	0.904941	1	4301	tags=43%, list=24%, signal=57%
GO_MYD88_INDEPENDENT_TOLL_LIKE_RECEPTOR_SIGNALING_PATHWAY	GO_MYD88_INDEPENDENT_TOLL_LIKE_RECEPTOR_SIGNALING_PATHWAY		30	0.393425	1.27137	0.185259	0.903813	1	1805	tags=30%, list=10%, signal=33%
GO_FERTILIZATION	GO_FERTILIZATION		117	0.29827	1.27127	0.101727	0.901668	1	4737	tags=31%, list=27%, signal=42%
GO_TRANS_GOLGI_NETWORK_MEMBRANE	GO_TRANS_GOLGI_NETWORK_MEMBRANE		75	0.305613	1.27031	0.137652	0.902719	1	3826	tags=32%, list=22%, signal=41%
GO_REGULATION_OF_CARBOHYDRATE_CATABOLIC_PROCESS	GO_REGULATION_OF_CARBOHYDRATE_CATABOLIC_PROCESS		38	0.328172	1.27015	0.119522	0.900853	1	3351	tags=24%, list=19%, signal=29%
GO_POSITIVE_REGULATION_OF_PROTEIN_MODIFICATION_BY_SMALL_PROTEIN_CONJUGATION_OR_REMOVAL	GO_POSITIVE_REGULATION_OF_PROTEIN_MODIFICATION_BY_SMALL_PROTEIN_CONJUGATION_OR_REMOVAL		184	0.316601	1.27014	0.1917	0.898419	1	2086	tags=23%, list=12%, signal=26%
GO_NEGATIVE_REGULATION_OF_SIGNAL_TRANSDUCTION_BY_P53_CLASS_MEDIATOR	GO_NEGATIVE_REGULATION_OF_SIGNAL_TRANSDUCTION_BY_P53_CLASS_MEDIATOR		26	0.394107	1.26988	0.154876	0.897086	1	3914	tags=46%, list=22%, signal=59%
GO_RETROGRADE_TRANSPORT_VESICLE_RECYCLING_WITHIN_GOLGI	GO_RETROGRADE_TRANSPORT_VESICLE_RECYCLING_WITHIN_GOLGI		21	0.437138	1.26928	0.229474	0.896899	1	4686	tags=48%, list=27%, signal=65%
GO_NUCLEAR_TRANSCRIBED_MRNA_CATABOLIC_PROCESS_EXONUCLEOLYTIC	GO_NUCLEAR_TRANSCRIBED_MRNA_CATABOLIC_PROCESS_EXONUCLEOLYTIC		30	0.458832	1.26902	0.230616	0.895367	1	2713	tags=37%, list=15%, signal=43%
GO_REGULATION_OF_MEGAKARYOCYTE_DIFFERENTIATION	GO_REGULATION_OF_MEGAKARYOCYTE_DIFFERENTIATION		27	0.466182	1.26895	0.254941	0.893151	1	4593	tags=56%, list=26%, signal=75%
GO_ANAPHASE_PROMOTING_COMPLEX	GO_ANAPHASE_PROMOTING_COMPLEX		20	0.470114	1.26875	0.221569	0.891488	1	1495	tags=35%, list=8%, signal=38%
GO_RECIPROCAL_DNA_RECOMBINATION	GO_RECIPROCAL_DNA_RECOMBINATION		33	0.435166	1.26862	0.210953	0.889554	1	3872	tags=42%, list=22%, signal=54%
GO_POSITIVE_REGULATION_OF_PROTEIN_EXPORT_FROM_NUCLEUS	GO_POSITIVE_REGULATION_OF_PROTEIN_EXPORT_FROM_NUCLEUS		19	0.392972	1.26721	0.179752	0.89225	1	1602	tags=26%, list=9%, signal=29%
GO_CELLULAR_PROTEIN_COMPLEX_ASSEMBLY	GO_CELLULAR_PROTEIN_COMPLEX_ASSEMBLY		313	0.282678	1.26716	0.149105	0.890066	1	4754	tags=38%, list=27%, signal=51%
GO_MICROBODY_PART	GO_MICROBODY_PART		90	0.34724	1.2671	0.20404	0.887921	1	3679	tags=36%, list=21%, signal=45%
GO_RNA_POLYMERASE_II_REPRESSING_TRANSCRIPTION_FACTOR_BINDING	GO_RNA_POLYMERASE_II_REPRESSING_TRANSCRIPTION_FACTOR_BINDING		27	0.377379	1.26618	0.176938	0.888985	1	4732	tags=56%, list=27%, signal=76%
GO_ATPASE_ACTIVITY_COUPLED	GO_ATPASE_ACTIVITY_COUPLED		305	0.278502	1.26579	0.144231	0.887951	1	3497	tags=29%, list=20%, signal=36%
GO_DETECTION_OF_CHEMICAL_STIMULUS_INVOLVED_IN_SENSORY_PERCEPTION_OF_TASTE	GO_DETECTION_OF_CHEMICAL_STIMULUS_INVOLVED_IN_SENSORY_PERCEPTION_OF_TASTE		28	0.459056	1.26533	0.245136	0.887367	1	3704	tags=39%, list=21%, signal=50%
GO_MODIFICATION_BY_SYMBIONT_OF_HOST_MORPHOLOGY_OR_PHYSIOLOGY	GO_MODIFICATION_BY_SYMBIONT_OF_HOST_MORPHOLOGY_OR_PHYSIOLOGY		43	0.348265	1.26532	0.144309	0.885051	1	2447	tags=21%, list=14%, signal=24%
GO_REGULATION_OF_PROTEIN_COMPLEX_DISASSEMBLY	GO_REGULATION_OF_PROTEIN_COMPLEX_DISASSEMBLY		196	0.293867	1.26463	0.162272	0.885146	1	3648	tags=32%, list=21%, signal=40%
GO_PROTEIN_LOCALIZATION_TO_CENTROSOME	GO_PROTEIN_LOCALIZATION_TO_CENTROSOME		15	0.47498	1.26458	0.197959	0.883003	1	5263	tags=67%, list=30%, signal=95%
GO_PROTEIN_LOCALIZATION_TO_NUCLEUS	GO_PROTEIN_LOCALIZATION_TO_NUCLEUS		151	0.284194	1.26415	0.144309	0.882272	1	3919	tags=30%, list=22%, signal=38%
GO_ESTABLISHMENT_OF_PROTEIN_LOCALIZATION_TO_GOLGI	GO_ESTABLISHMENT_OF_PROTEIN_LOCALIZATION_TO_GOLGI		17	0.453256	1.2638	0.204593	0.881349	1	2496	tags=29%, list=14%, signal=34%
GO_POSITIVE_REGULATION_OF_TELOMERASE_ACTIVITY	GO_POSITIVE_REGULATION_OF_TELOMERASE_ACTIVITY		27	0.378386	1.26349	0.180934	0.880197	1	4113	tags=44%, list=23%, signal=58%
GO_PROTEIN_HETEROOLIGOMERIZATION	GO_PROTEIN_HETEROOLIGOMERIZATION		106	0.332957	1.26326	0.213147	0.878735	1	2902	tags=34%, list=16%, signal=40%
GO_RNA_POLYMERASE_COMPLEX	GO_RNA_POLYMERASE_COMPLEX		117	0.350366	1.26323	0.193878	0.876566	1	4233	tags=45%, list=24%, signal=59%
GO_NEGATIVE_REGULATION_OF_HISTONE_ACETYLATION	GO_NEGATIVE_REGULATION_OF_HISTONE_ACETYLATION		15	0.405661	1.26252	0.17495	0.876872	1	1038	tags=27%, list=6%, signal=28%
GO_MIDBRAIN_DEVELOPMENT	GO_MIDBRAIN_DEVELOPMENT		84	0.302664	1.26174	0.147638	0.877406	1	3022	tags=24%, list=17%, signal=29%
GO_MICROBODY	GO_MICROBODY		123	0.325659	1.26156	0.190945	0.875782	1	2429	tags=26%, list=14%, signal=30%
GO_RESPONSE_TO_AMINE	GO_RESPONSE_TO_AMINE		47	0.341957	1.26141	0.142857	0.874069	1	2647	tags=21%, list=15%, signal=25%
GO_NEGATIVE_REGULATION_OF_RECEPTOR_ACTIVITY	GO_NEGATIVE_REGULATION_OF_RECEPTOR_ACTIVITY		29	0.372917	1.26137	0.164583	0.871972	1	2686	tags=28%, list=15%, signal=32%
GO_MYOBLAST_DIFFERENTIATION	GO_MYOBLAST_DIFFERENTIATION		34	0.358881	1.26127	0.170886	0.870148	1	1536	tags=21%, list=9%, signal=23%
GO_CELL_PROJECTION_CYTOPLASM	GO_CELL_PROJECTION_CYTOPLASM		48	0.330353	1.26122	0.118712	0.868135	1	1329	tags=19%, list=8%, signal=20%
GO_CHROMATIN_ASSEMBLY_OR_DISASSEMBLY	GO_CHROMATIN_ASSEMBLY_OR_DISASSEMBLY		149	0.393467	1.26109	0.265873	0.866466	1	3426	tags=44%, list=19%, signal=54%
GO_MRNA_BINDING	GO_MRNA_BINDING		143	0.313486	1.26091	0.179283	0.864896	1	3279	tags=29%, list=19%, signal=35%
GO_RNA_POLYMERASE_II_CORE_BINDING	GO_RNA_POLYMERASE_II_CORE_BINDING		15	0.477923	1.25909	0.21748	0.869333	1	4368	tags=67%, list=25%, signal=89%
GO_REGULATION_OF_RESPONSE_TO_EXTRACELLULAR_STIMULUS	GO_REGULATION_OF_RESPONSE_TO_EXTRACELLULAR_STIMULUS		165	0.267369	1.25864	0.122661	0.868804	1	3528	tags=28%, list=20%, signal=35%
GO_RIBONUCLEASE_ACTIVITY	GO_RIBONUCLEASE_ACTIVITY		86	0.34607	1.25858	0.207619	0.86682	1	2846	tags=26%, list=16%, signal=30%
GO_SINGLE_STRANDED_DNA_BINDING	GO_SINGLE_STRANDED_DNA_BINDING		77	0.396026	1.25775	0.229167	0.867478	1	3920	tags=44%, list=22%, signal=57%
GO_REGULATION_OF_PROTEIN_COMPLEX_ASSEMBLY	GO_REGULATION_OF_PROTEIN_COMPLEX_ASSEMBLY		347	0.252163	1.25754	0.0910973	0.866007	1	3646	tags=27%, list=21%, signal=34%
GO_POSITIVE_REGULATION_OF_INTERFERON_BETA_PRODUCTION	GO_POSITIVE_REGULATION_OF_INTERFERON_BETA_PRODUCTION		30	0.376151	1.25675	0.173278	0.866717	1	5013	tags=50%, list=28%, signal=70%
GO_ESTABLISHMENT_OF_ENDOTHELIAL_BARRIER	GO_ESTABLISHMENT_OF_ENDOTHELIAL_BARRIER		29	0.413613	1.25523	0.208748	0.869996	1	2456	tags=34%, list=14%, signal=40%
GO_PHOSPHOTRANSFERASE_ACTIVITY_FOR_OTHER_SUBSTITUTED_PHOSPHATE_GROUPS	GO_PHOSPHOTRANSFERASE_ACTIVITY_FOR_OTHER_SUBSTITUTED_PHOSPHATE_GROUPS		18	0.425742	1.25445	0.196078	0.870397	1	2497	tags=50%, list=14%, signal=58%
GO_MEIOTIC_CHROMOSOME_SEGREGATION	GO_MEIOTIC_CHROMOSOME_SEGREGATION		46	0.364805	1.25319	0.196078	0.872736	1	3797	tags=35%, list=22%, signal=44%
GO_RESPONSE_TO_ANTIBIOTIC	GO_RESPONSE_TO_ANTIBIOTIC		45	0.342462	1.25295	0.180791	0.871419	1	2794	tags=24%, list=16%, signal=29%
GO_PROTEIN_SERINE_THREONINE_KINASE_INHIBITOR_ACTIVITY	GO_PROTEIN_SERINE_THREONINE_KINASE_INHIBITOR_ACTIVITY		30	0.368851	1.25265	0.188	0.870318	1	3204	tags=33%, list=18%, signal=41%
GO_HISTONE_BINDING	GO_HISTONE_BINDING		163	0.348972	1.25247	0.210634	0.868795	1	2902	tags=33%, list=16%, signal=39%
GO_GOLGI_TO_VACUOLE_TRANSPORT	GO_GOLGI_TO_VACUOLE_TRANSPORT		25	0.403977	1.25226	0.225049	0.86732	1	2225	tags=32%, list=13%, signal=37%
GO_MITOTIC_SISTER_CHROMATID_SEGREGATION	GO_MITOTIC_SISTER_CHROMATID_SEGREGATION		88	0.400953	1.25121	0.28373	0.868905	1	3221	tags=42%, list=18%, signal=51%
GO_NUCLEAR_IMPORT	GO_NUCLEAR_IMPORT		126	0.301882	1.2494	0.155738	0.873356	1	4493	tags=37%, list=25%, signal=50%
GO_INTRINSIC_COMPONENT_OF_MITOCHONDRIAL_INNER_MEMBRANE	GO_INTRINSIC_COMPONENT_OF_MITOCHONDRIAL_INNER_MEMBRANE		16	0.534981	1.24873	0.256513	0.873655	1	3619	tags=63%, list=20%, signal=79%
GO_PEPTIDASE_ACTIVATOR_ACTIVITY_INVOLVED_IN_APOPTOTIC_PROCESS	GO_PEPTIDASE_ACTIVATOR_ACTIVITY_INVOLVED_IN_APOPTOTIC_PROCESS		19	0.404812	1.24853	0.175542	0.872201	1	4022	tags=47%, list=23%, signal=61%
GO_H4_HISTONE_ACETYLTRANSFERASE_COMPLEX	GO_H4_HISTONE_ACETYLTRANSFERASE_COMPLEX		17	0.42392	1.24842	0.215886	0.870445	1	1796	tags=41%, list=10%, signal=46%
GO_RAN_GTPASE_BINDING	GO_RAN_GTPASE_BINDING		31	0.422276	1.24829	0.241584	0.868846	1	2702	tags=39%, list=15%, signal=46%
GO_POSITIVE_REGULATION_OF_PEPTIDYL_SERINE_PHOSPHORYLATION	GO_POSITIVE_REGULATION_OF_PEPTIDYL_SERINE_PHOSPHORYLATION		71	0.307725	1.24721	0.155556	0.870536	1	2526	tags=24%, list=14%, signal=28%
GO_POSITIVE_REGULATION_OF_NUCLEAR_DIVISION	GO_POSITIVE_REGULATION_OF_NUCLEAR_DIVISION		56	0.323988	1.24635	0.161034	0.871531	1	2079	tags=21%, list=12%, signal=24%
GO_DNA_PACKAGING	GO_DNA_PACKAGING		160	0.396255	1.24622	0.282306	0.869884	1	3426	tags=46%, list=19%, signal=56%
GO_POSITIVE_REGULATION_OF_TELOMERE_CAPPING	GO_POSITIVE_REGULATION_OF_TELOMERE_CAPPING		15	0.420459	1.24615	0.185185	0.868023	1	2374	tags=33%, list=13%, signal=38%
GO_REGULATION_OF_PEPTIDYL_THREONINE_PHOSPHORYLATION	GO_REGULATION_OF_PEPTIDYL_THREONINE_PHOSPHORYLATION		35	0.345992	1.24536	0.186094	0.868766	1	2390	tags=23%, list=14%, signal=26%
GO_TRANSCRIPTION_ELONGATION_FROM_RNA_POLYMERASE_II_PROMOTER	GO_TRANSCRIPTION_ELONGATION_FROM_RNA_POLYMERASE_II_PROMOTER		71	0.363288	1.24526	0.218504	0.867004	1	3288	tags=42%, list=19%, signal=52%
GO_G2_DNA_DAMAGE_CHECKPOINT	GO_G2_DNA_DAMAGE_CHECKPOINT		31	0.382511	1.24461	0.213439	0.867204	1	3920	tags=48%, list=22%, signal=62%
GO_NONMOTILE_PRIMARY_CILIUM_ASSEMBLY	GO_NONMOTILE_PRIMARY_CILIUM_ASSEMBLY		22	0.404589	1.24366	0.19802	0.868559	1	3100	tags=41%, list=18%, signal=50%
GO_DNA_SYNTHESIS_INVOLVED_IN_DNA_REPAIR	GO_DNA_SYNTHESIS_INVOLVED_IN_DNA_REPAIR		67	0.401017	1.24333	0.249497	0.867569	1	3920	tags=48%, list=22%, signal=61%
GO_ENERGY_RESERVE_METABOLIC_PROCESS	GO_ENERGY_RESERVE_METABOLIC_PROCESS		66	0.30622	1.24257	0.153543	0.868194	1	2611	tags=24%, list=15%, signal=28%
GO_CYTOKINE_PRODUCTION_INVOLVED_IN_IMMUNE_RESPONSE	GO_CYTOKINE_PRODUCTION_INVOLVED_IN_IMMUNE_RESPONSE		16	0.452401	1.24229	0.214575	0.867129	1	3181	tags=31%, list=18%, signal=38%
GO_REGULATION_OF_ARP2_3_COMPLEX_MEDIATED_ACTIN_NUCLEATION	GO_REGULATION_OF_ARP2_3_COMPLEX_MEDIATED_ACTIN_NUCLEATION		15	0.414625	1.2402	0.208589	0.872408	1	1013	tags=27%, list=6%, signal=28%
GO_REGULATION_OF_NUCLEOTIDE_CATABOLIC_PROCESS	GO_REGULATION_OF_NUCLEOTIDE_CATABOLIC_PROCESS		32	0.359356	1.23976	0.178	0.871852	1	3351	tags=25%, list=19%, signal=31%
GO_REGULATION_OF_CELL_CYCLE_CHECKPOINT	GO_REGULATION_OF_CELL_CYCLE_CHECKPOINT		27	0.404021	1.23948	0.214286	0.870838	1	2570	tags=37%, list=15%, signal=43%
GO_NUCLEIC_ACID_PHOSPHODIESTER_BOND_HYDROLYSIS	GO_NUCLEIC_ACID_PHOSPHODIESTER_BOND_HYDROLYSIS		229	0.321518	1.23906	0.22334	0.870338	1	4221	tags=38%, list=24%, signal=49%
GO_BASAL_TRANSCRIPTION_MACHINERY_BINDING	GO_BASAL_TRANSCRIPTION_MACHINERY_BINDING		23	0.420372	1.2389	0.2251	0.868897	1	4368	tags=61%, list=25%, signal=81%
GO_POSITIVE_REGULATION_OF_AUTOPHAGY	GO_POSITIVE_REGULATION_OF_AUTOPHAGY		74	0.318684	1.23812	0.169072	0.869542	1	2070	tags=22%, list=12%, signal=24%
GO_SOMATIC_RECOMBINATION_OF_IMMUNOGLOBULIN_GENE_SEGMENTS	GO_SOMATIC_RECOMBINATION_OF_IMMUNOGLOBULIN_GENE_SEGMENTS		21	0.428138	1.23728	0.231557	0.87039	1	4774	tags=48%, list=27%, signal=65%
GO_SIN3_TYPE_COMPLEX	GO_SIN3_TYPE_COMPLEX		16	0.427366	1.23661	0.229376	0.870607	1	1898	tags=38%, list=11%, signal=42%
GO_REGULATION_OF_PEPTIDYL_SERINE_PHOSPHORYLATION	GO_REGULATION_OF_PEPTIDYL_SERINE_PHOSPHORYLATION		98	0.292718	1.23625	0.149897	0.869848	1	2526	tags=22%, list=14%, signal=26%
GO_REGULATION_OF_INTRACELLULAR_STEROID_HORMONE_RECEPTOR_SIGNALING_PATHWAY	GO_REGULATION_OF_INTRACELLULAR_STEROID_HORMONE_RECEPTOR_SIGNALING_PATHWAY		55	0.302565	1.23508	0.14751	0.871933	1	3599	tags=33%, list=20%, signal=41%
GO_CELLULAR_PROTEIN_COMPLEX_LOCALIZATION	GO_CELLULAR_PROTEIN_COMPLEX_LOCALIZATION		21	0.3817	1.23451	0.181633	0.871828	1	3644	tags=43%, list=21%, signal=54%
GO_GLUTAMATE_METABOLIC_PROCESS	GO_GLUTAMATE_METABOLIC_PROCESS		27	0.37523	1.23429	0.190196	0.870664	1	4311	tags=30%, list=24%, signal=39%
GO_REGULATION_OF_CELLULAR_SENESCENCE	GO_REGULATION_OF_CELLULAR_SENESCENCE		26	0.368191	1.23385	0.190114	0.87029	1	3531	tags=38%, list=20%, signal=48%
GO_REGULATION_OF_MITOTIC_CELL_CYCLE	GO_REGULATION_OF_MITOTIC_CELL_CYCLE		443	0.273006	1.23258	0.183468	0.872625	1	3945	tags=33%, list=22%, signal=41%
GO_GLUCAN_METABOLIC_PROCESS	GO_GLUCAN_METABOLIC_PROCESS		55	0.31892	1.23159	0.175153	0.87407	1	2611	tags=25%, list=15%, signal=30%
GO_POSITIVE_REGULATION_OF_CELL_CYCLE_PROCESS	GO_POSITIVE_REGULATION_OF_CELL_CYCLE_PROCESS		224	0.274443	1.23091	0.156504	0.874365	1	3368	tags=27%, list=19%, signal=33%
GO_REGULATION_OF_TRANSLATION_IN_RESPONSE_TO_STRESS	GO_REGULATION_OF_TRANSLATION_IN_RESPONSE_TO_STRESS		19	0.391635	1.23086	0.19186	0.872584	1	2157	tags=32%, list=12%, signal=36%
GO_MITOTIC_SPINDLE_ORGANIZATION	GO_MITOTIC_SPINDLE_ORGANIZATION		64	0.382305	1.2298	0.269874	0.874279	1	3617	tags=39%, list=20%, signal=49%
GO_PTERIDINE_CONTAINING_COMPOUND_BIOSYNTHETIC_PROCESS	GO_PTERIDINE_CONTAINING_COMPOUND_BIOSYNTHETIC_PROCESS		16	0.527424	1.22959	0.284024	0.873003	1	2488	tags=38%, list=14%, signal=44%
GO_TELOMERE_ORGANIZATION	GO_TELOMERE_ORGANIZATION		101	0.383594	1.22885	0.266802	0.873756	1	4280	tags=51%, list=24%, signal=68%
GO_NCRNA_TRANSCRIPTION	GO_NCRNA_TRANSCRIPTION		80	0.332814	1.22821	0.227533	0.873887	1	3636	tags=43%, list=21%, signal=53%
GO_ZINC_ION_HOMEOSTASIS	GO_ZINC_ION_HOMEOSTASIS		19	0.408112	1.22818	0.198819	0.87203	1	608	tags=21%, list=3%, signal=22%
GO_PROTEIN_N_LINKED_GLYCOSYLATION	GO_PROTEIN_N_LINKED_GLYCOSYLATION		73	0.310815	1.22699	0.205479	0.874112	1	2591	tags=25%, list=15%, signal=29%
GO_NEGATIVE_REGULATION_OF_CYCLIN_DEPENDENT_PROTEIN_KINASE_ACTIVITY	GO_NEGATIVE_REGULATION_OF_CYCLIN_DEPENDENT_PROTEIN_KINASE_ACTIVITY		32	0.327766	1.22689	0.175153	0.872595	1	1672	tags=22%, list=9%, signal=24%
GO_ACETYLTRANSFERASE_COMPLEX	GO_ACETYLTRANSFERASE_COMPLEX		84	0.326564	1.2266	0.222664	0.871756	1	3282	tags=37%, list=19%, signal=45%
GO_POSITIVE_REGULATION_OF_PHOSPHOPROTEIN_PHOSPHATASE_ACTIVITY	GO_POSITIVE_REGULATION_OF_PHOSPHOPROTEIN_PHOSPHATASE_ACTIVITY		15	0.447327	1.22611	0.240326	0.871423	1	1302	tags=27%, list=7%, signal=29%
GO_RIBONUCLEOPROTEIN_COMPLEX_SUBUNIT_ORGANIZATION	GO_RIBONUCLEOPROTEIN_COMPLEX_SUBUNIT_ORGANIZATION		184	0.358046	1.224	0.258383	0.876654	1	4306	tags=42%, list=24%, signal=55%
GO_MICROTUBULE_BASED_PROCESS	GO_MICROTUBULE_BASED_PROCESS		477	0.262297	1.22334	0.171657	0.876876	1	3646	tags=28%, list=21%, signal=34%
GO_REGULATION_OF_CELLULAR_RESPONSE_TO_HEAT	GO_REGULATION_OF_CELLULAR_RESPONSE_TO_HEAT		72	0.334646	1.22334	0.230769	0.874959	1	4217	tags=42%, list=24%, signal=55%
GO_DNA_CONFORMATION_CHANGE	GO_DNA_CONFORMATION_CHANGE		235	0.371554	1.22261	0.281124	0.875565	1	3519	tags=43%, list=20%, signal=52%
GO_LATE_ENDOSOME_MEMBRANE	GO_LATE_ENDOSOME_MEMBRANE		94	0.314787	1.22239	0.206823	0.874416	1	3154	tags=33%, list=18%, signal=40%
GO_NUCLEOTIDE_TRANSMEMBRANE_TRANSPORTER_ACTIVITY	GO_NUCLEOTIDE_TRANSMEMBRANE_TRANSPORTER_ACTIVITY		19	0.414152	1.22221	0.24283	0.873096	1	2620	tags=37%, list=15%, signal=43%
GO_POSITIVE_REGULATION_OF_TRANSLATIONAL_INITIATION	GO_POSITIVE_REGULATION_OF_TRANSLATIONAL_INITIATION		22	0.379922	1.22159	0.210526	0.8734	1	3945	tags=45%, list=22%, signal=58%
GO_RNA_POLYMERASE_II_TRANSCRIPTION_FACTOR_COMPLEX	GO_RNA_POLYMERASE_II_TRANSCRIPTION_FACTOR_COMPLEX		96	0.305647	1.21971	0.226263	0.877822	1	3669	tags=33%, list=21%, signal=42%
GO_CELLULAR_RESPONSE_TO_AMINO_ACID_STARVATION	GO_CELLULAR_RESPONSE_TO_AMINO_ACID_STARVATION		24	0.362527	1.2197	0.193359	0.875926	1	2579	tags=33%, list=15%, signal=39%
GO_POSITIVE_REGULATION_OF_PROTEIN_CATABOLIC_PROCESS	GO_POSITIVE_REGULATION_OF_PROTEIN_CATABOLIC_PROCESS		253	0.272252	1.21957	0.19057	0.874379	1	2159	tags=22%, list=12%, signal=24%
GO_GLYOXYLATE_METABOLIC_PROCESS	GO_GLYOXYLATE_METABOLIC_PROCESS		27	0.41692	1.2182	0.241176	0.877259	1	2848	tags=33%, list=16%, signal=40%
GO_REGULATION_OF_INTRINSIC_APOPTOTIC_SIGNALING_PATHWAY_BY_P53_CLASS_MEDIATOR	GO_REGULATION_OF_INTRINSIC_APOPTOTIC_SIGNALING_PATHWAY_BY_P53_CLASS_MEDIATOR		21	0.403505	1.21726	0.234615	0.878595	1	3914	tags=43%, list=22%, signal=55%
GO_MICROTUBULE_ORGANIZING_CENTER_ORGANIZATION	GO_MICROTUBULE_ORGANIZING_CENTER_ORGANIZATION		79	0.351771	1.21687	0.257485	0.878055	1	4097	tags=44%, list=23%, signal=57%
GO_TRANS_GOLGI_NETWORK	GO_TRANS_GOLGI_NETWORK		179	0.264832	1.21686	0.159919	0.876207	1	2606	tags=21%, list=15%, signal=25%
GO_RESPONSE_TO_UV	GO_RESPONSE_TO_UV		120	0.285489	1.21683	0.184261	0.874474	1	3306	tags=29%, list=19%, signal=36%
GO_PROTEIN_K63_LINKED_UBIQUITINATION	GO_PROTEIN_K63_LINKED_UBIQUITINATION		34	0.341797	1.21626	0.201207	0.874567	1	3403	tags=38%, list=19%, signal=47%
GO_REGULATION_OF_DNA_METABOLIC_PROCESS	GO_REGULATION_OF_DNA_METABOLIC_PROCESS		316	0.267486	1.21544	0.182365	0.875336	1	3235	tags=26%, list=18%, signal=31%
GO_SOMATIC_CELL_DNA_RECOMBINATION	GO_SOMATIC_CELL_DNA_RECOMBINATION		31	0.395096	1.21542	0.263918	0.873518	1	4308	tags=39%, list=24%, signal=51%
GO_NEGATIVE_REGULATION_OF_PROTEIN_CATABOLIC_PROCESS	GO_NEGATIVE_REGULATION_OF_PROTEIN_CATABOLIC_PROCESS		103	0.265903	1.21495	0.137097	0.873268	1	4734	tags=41%, list=27%, signal=55%
GO_ER_TO_GOLGI_TRANSPORT_VESICLE	GO_ER_TO_GOLGI_TRANSPORT_VESICLE		67	0.345896	1.21467	0.252941	0.872406	1	2586	tags=24%, list=15%, signal=28%
GO_REGULATION_OF_SPINDLE_ORGANIZATION	GO_REGULATION_OF_SPINDLE_ORGANIZATION		19	0.395661	1.21452	0.225152	0.870995	1	2550	tags=42%, list=14%, signal=49%
GO_PROTEIN_IMPORT	GO_PROTEIN_IMPORT		150	0.275865	1.21351	0.170974	0.872437	1	3919	tags=32%, list=22%, signal=41%
GO_INTESTINAL_EPITHELIAL_CELL_DIFFERENTIATION	GO_INTESTINAL_EPITHELIAL_CELL_DIFFERENTIATION		16	0.414738	1.21256	0.218876	0.87382	1	4038	tags=44%, list=23%, signal=57%
GO_RNA_POLYADENYLATION	GO_RNA_POLYADENYLATION		28	0.418239	1.21252	0.272358	0.87212	1	2724	tags=43%, list=15%, signal=51%
GO_ACTIN_NUCLEATION	GO_ACTIN_NUCLEATION		21	0.403465	1.21223	0.242798	0.871268	1	1684	tags=29%, list=10%, signal=32%
GO_NEGATIVE_REGULATION_OF_PROTEIN_LOCALIZATION_TO_CELL_PERIPHERY	GO_NEGATIVE_REGULATION_OF_PROTEIN_LOCALIZATION_TO_CELL_PERIPHERY		20	0.381444	1.21183	0.219512	0.870771	1	1400	tags=25%, list=8%, signal=27%
GO_SULFUR_AMINO_ACID_METABOLIC_PROCESS	GO_SULFUR_AMINO_ACID_METABOLIC_PROCESS		40	0.331957	1.21175	0.195777	0.869262	1	3496	tags=33%, list=20%, signal=40%
GO_DISULFIDE_OXIDOREDUCTASE_ACTIVITY	GO_DISULFIDE_OXIDOREDUCTASE_ACTIVITY		27	0.420629	1.21146	0.276423	0.868419	1	4042	tags=48%, list=23%, signal=62%
GO_ASYMMETRIC_PROTEIN_LOCALIZATION	GO_ASYMMETRIC_PROTEIN_LOCALIZATION		18	0.400353	1.21083	0.198039	0.868614	1	2672	tags=33%, list=15%, signal=39%
GO_NEGATIVE_REGULATION_OF_CHROMOSOME_ORGANIZATION	GO_NEGATIVE_REGULATION_OF_CHROMOSOME_ORGANIZATION		93	0.316864	1.21001	0.216433	0.86961	1	3780	tags=39%, list=21%, signal=49%
GO_3_5_EXONUCLEASE_ACTIVITY	GO_3_5_EXONUCLEASE_ACTIVITY		44	0.363847	1.20958	0.265625	0.869257	1	4206	tags=45%, list=24%, signal=60%
GO_REGULATION_OF_CIRCADIAN_RHYTHM	GO_REGULATION_OF_CIRCADIAN_RHYTHM		93	0.281178	1.20855	0.173653	0.871024	1	3599	tags=25%, list=20%, signal=31%
GO_PREASSEMBLY_OF_GPI_ANCHOR_IN_ER_MEMBRANE	GO_PREASSEMBLY_OF_GPI_ANCHOR_IN_ER_MEMBRANE		15	0.457724	1.20854	0.258555	0.869256	1	3445	tags=53%, list=20%, signal=66%
GO_NUCLEOTIDE_EXCISION_REPAIR_DNA_DAMAGE_RECOGNITION	GO_NUCLEOTIDE_EXCISION_REPAIR_DNA_DAMAGE_RECOGNITION		23	0.436479	1.20765	0.263889	0.870409	1	1716	tags=30%, list=10%, signal=34%
GO_RESPONSE_TO_IRON_ION	GO_RESPONSE_TO_IRON_ION		35	0.343187	1.20723	0.213725	0.869984	1	3507	tags=31%, list=20%, signal=39%
GO_NEGATIVE_REGULATION_OF_CELL_CYCLE_G2_M_PHASE_TRANSITION	GO_NEGATIVE_REGULATION_OF_CELL_CYCLE_G2_M_PHASE_TRANSITION		23	0.377584	1.20703	0.220648	0.868828	1	3920	tags=48%, list=22%, signal=61%
GO_MULTIVESICULAR_BODY_ORGANIZATION	GO_MULTIVESICULAR_BODY_ORGANIZATION		30	0.398197	1.20638	0.255489	0.869167	1	2008	tags=37%, list=11%, signal=41%
GO_DOUBLE_STRAND_BREAK_REPAIR	GO_DOUBLE_STRAND_BREAK_REPAIR		150	0.36397	1.20638	0.272358	0.867412	1	3973	tags=43%, list=22%, signal=55%
GO_MULTICELLULAR_ORGANISM_AGING	GO_MULTICELLULAR_ORGANISM_AGING		29	0.347006	1.20533	0.199612	0.86908	1	4737	tags=38%, list=27%, signal=52%
GO_DNA_DEPENDENT_ATPASE_ACTIVITY	GO_DNA_DEPENDENT_ATPASE_ACTIVITY		76	0.397175	1.20457	0.281376	0.869819	1	3920	tags=47%, list=22%, signal=61%
GO_DNA_TEMPLATED_TRANSCRIPTION_ELONGATION	GO_DNA_TEMPLATED_TRANSCRIPTION_ELONGATION		86	0.353572	1.20384	0.261134	0.870403	1	3669	tags=44%, list=21%, signal=56%
GO_GERM_CELL_DEVELOPMENT	GO_GERM_CELL_DEVELOPMENT		163	0.26139	1.20383	0.149798	0.868692	1	3646	tags=25%, list=21%, signal=31%
GO_REGULATION_OF_CELL_CYCLE_PHASE_TRANSITION	GO_REGULATION_OF_CELL_CYCLE_PHASE_TRANSITION		307	0.281563	1.20352	0.2	0.867917	1	3607	tags=30%, list=20%, signal=37%
GO_POSTTRANSCRIPTIONAL_GENE_SILENCING	GO_POSTTRANSCRIPTIONAL_GENE_SILENCING		37	0.35918	1.2026	0.22288	0.869248	1	1093	tags=16%, list=6%, signal=17%
GO_COBALAMIN_METABOLIC_PROCESS	GO_COBALAMIN_METABOLIC_PROCESS		21	0.413155	1.20181	0.243714	0.87009	1	4815	tags=52%, list=27%, signal=72%
GO_CELL_CYCLE_ARREST	GO_CELL_CYCLE_ARREST		140	0.255197	1.20051	0.160243	0.872572	1	3258	tags=25%, list=18%, signal=30%
GO_PROTEIN_HETERODIMERIZATION_ACTIVITY	GO_PROTEIN_HETERODIMERIZATION_ACTIVITY		426	0.265172	1.20038	0.202454	0.871291	1	3337	tags=26%, list=19%, signal=31%
GO_MYELIN_SHEATH	GO_MYELIN_SHEATH		161	0.310094	1.19944	0.252546	0.872682	1	3078	tags=24%, list=17%, signal=28%
GO_PROTEIN_ADP_RIBOSYLATION	GO_PROTEIN_ADP_RIBOSYLATION		20	0.354201	1.19936	0.205882	0.871179	1	2359	tags=30%, list=13%, signal=35%
GO_GOLGI_TO_ENDOSOME_TRANSPORT	GO_GOLGI_TO_ENDOSOME_TRANSPORT		17	0.427627	1.19855	0.245098	0.872134	1	3050	tags=41%, list=17%, signal=50%
GO_POSITIVE_REGULATION_OF_ATPASE_ACTIVITY	GO_POSITIVE_REGULATION_OF_ATPASE_ACTIVITY		41	0.333377	1.19841	0.193294	0.870873	1	4383	tags=34%, list=25%, signal=45%
GO_MICROTUBULE_CYTOSKELETON_ORGANIZATION	GO_MICROTUBULE_CYTOSKELETON_ORGANIZATION		313	0.276858	1.19837	0.227723	0.869317	1	3646	tags=29%, list=21%, signal=36%
GO_TOXIN_TRANSPORT	GO_TOXIN_TRANSPORT		36	0.335737	1.19818	0.22332	0.868176	1	3498	tags=33%, list=20%, signal=41%
GO_EXONUCLEASE_ACTIVITY_ACTIVE_WITH_EITHER_RIBO_OR_DEOXYRIBONUCLEIC_ACIDS_AND_PRODUCING_5_PHOSPHOMONOESTERS	GO_EXONUCLEASE_ACTIVITY_ACTIVE_WITH_EITHER_RIBO_OR_DEOXYRIBONUCLEIC_ACIDS_AND_PRODUCING_5_PHOSPHOMONOESTERS		40	0.391487	1.19812	0.292	0.866634	1	1029	tags=23%, list=6%, signal=24%
GO_REGULATION_OF_DNA_TEMPLATED_TRANSCRIPTION_INITIATION	GO_REGULATION_OF_DNA_TEMPLATED_TRANSCRIPTION_INITIATION		31	0.349998	1.19725	0.207101	0.867873	1	3646	tags=39%, list=21%, signal=49%
GO_POSITIVE_REGULATION_OF_ORGANELLE_ASSEMBLY	GO_POSITIVE_REGULATION_OF_ORGANELLE_ASSEMBLY		42	0.331802	1.19707	0.227848	0.866736	1	4105	tags=38%, list=23%, signal=50%
GO_ORGANIC_HYDROXY_COMPOUND_BIOSYNTHETIC_PROCESS	GO_ORGANIC_HYDROXY_COMPOUND_BIOSYNTHETIC_PROCESS		167	0.271243	1.1963	0.187625	0.867548	1	2671	tags=20%, list=15%, signal=23%
GO_PHOSPHATIDYLINOSITOL_BIOSYNTHETIC_PROCESS	GO_PHOSPHATIDYLINOSITOL_BIOSYNTHETIC_PROCESS		117	0.26975	1.19588	0.171815	0.867243	1	3094	tags=26%, list=18%, signal=31%
GO_COATED_MEMBRANE	GO_COATED_MEMBRANE		81	0.294904	1.19572	0.223282	0.866021	1	3315	tags=32%, list=19%, signal=39%
GO_MRNA_3_UTR_BINDING	GO_MRNA_3_UTR_BINDING		47	0.337485	1.19528	0.242857	0.865693	1	2605	tags=28%, list=15%, signal=32%
GO_TRNA_BINDING	GO_TRNA_BINDING		43	0.395688	1.19488	0.280702	0.865308	1	3133	tags=40%, list=18%, signal=48%
GO_REGULATION_OF_TELOMERE_MAINTENANCE	GO_REGULATION_OF_TELOMERE_MAINTENANCE		64	0.335577	1.19457	0.253493	0.864611	1	3646	tags=38%, list=21%, signal=47%
GO_POSITIVE_REGULATION_OF_TRANSCRIPTION_FROM_RNA_POLYMERASE_II_PROMOTER_INVOLVED_IN_CELLULAR_RESPONSE_TO_CHEMICAL_STIMULUS	GO_POSITIVE_REGULATION_OF_TRANSCRIPTION_FROM_RNA_POLYMERASE_II_PROMOTER_INVOLVED_IN_CELLULAR_RESPONSE_TO_CHEMICAL_STIMULUS		25	0.363077	1.19369	0.244141	0.865754	1	3310	tags=32%, list=19%, signal=39%
GO_SPERMATID_DIFFERENTIATION	GO_SPERMATID_DIFFERENTIATION		93	0.280721	1.19303	0.160714	0.866244	1	3670	tags=28%, list=21%, signal=35%
GO_NEGATIVE_REGULATION_OF_NF_KAPPAB_IMPORT_INTO_NUCLEUS	GO_NEGATIVE_REGULATION_OF_NF_KAPPAB_IMPORT_INTO_NUCLEUS		17	0.40197	1.19292	0.236434	0.864859	1	1450	tags=24%, list=8%, signal=26%
GO_CATION_SUGAR_SYMPORTER_ACTIVITY	GO_CATION_SUGAR_SYMPORTER_ACTIVITY		15	0.424223	1.1925	0.252918	0.864507	1	2607	tags=33%, list=15%, signal=39%
GO_PIGMENT_GRANULE_LOCALIZATION	GO_PIGMENT_GRANULE_LOCALIZATION		23	0.366046	1.19222	0.23374	0.863731	1	2810	tags=39%, list=16%, signal=46%
GO_REGULATION_OF_PROTEIN_AUTOPHOSPHORYLATION	GO_REGULATION_OF_PROTEIN_AUTOPHOSPHORYLATION		35	0.353373	1.19178	0.248996	0.863548	1	2242	tags=23%, list=13%, signal=26%
GO_UBIQUITIN_LIKE_PROTEIN_LIGASE_BINDING	GO_UBIQUITIN_LIKE_PROTEIN_LIGASE_BINDING		251	0.248912	1.19122	0.174004	0.863717	1	3310	tags=28%, list=19%, signal=34%
GO_REGULATION_OF_LIGASE_ACTIVITY	GO_REGULATION_OF_LIGASE_ACTIVITY		125	0.35657	1.1912	0.304951	0.862116	1	1988	tags=27%, list=11%, signal=30%
GO_POSITIVE_REGULATION_OF_MITOTIC_NUCLEAR_DIVISION	GO_POSITIVE_REGULATION_OF_MITOTIC_NUCLEAR_DIVISION		46	0.325747	1.19115	0.228346	0.86062	1	2079	tags=24%, list=12%, signal=27%
GO_POSITIVE_REGULATION_OF_PHOSPHATASE_ACTIVITY	GO_POSITIVE_REGULATION_OF_PHOSPHATASE_ACTIVITY		27	0.37191	1.19036	0.272358	0.861578	1	1302	tags=19%, list=7%, signal=20%
GO_SOLUTE_PROTON_SYMPORTER_ACTIVITY	GO_SOLUTE_PROTON_SYMPORTER_ACTIVITY		25	0.358332	1.18981	0.236264	0.861698	1	2607	tags=24%, list=15%, signal=28%
GO_PROTEIN_TYROSINE_SERINE_THREONINE_PHOSPHATASE_ACTIVITY	GO_PROTEIN_TYROSINE_SERINE_THREONINE_PHOSPHATASE_ACTIVITY		40	0.311109	1.18975	0.196498	0.860248	1	3258	tags=30%, list=18%, signal=37%
GO_RESPONSE_TO_ENDOPLASMIC_RETICULUM_STRESS	GO_RESPONSE_TO_ENDOPLASMIC_RETICULUM_STRESS		219	0.267208	1.18924	0.219178	0.860355	1	3501	tags=29%, list=20%, signal=36%
GO_NEGATIVE_REGULATION_OF_CELLULAR_PROTEIN_CATABOLIC_PROCESS	GO_NEGATIVE_REGULATION_OF_CELLULAR_PROTEIN_CATABOLIC_PROCESS		60	0.301137	1.1879	0.229084	0.863156	1	4734	tags=48%, list=27%, signal=66%
GO_SMALL_GTPASE_MEDIATED_SIGNAL_TRANSDUCTION	GO_SMALL_GTPASE_MEDIATED_SIGNAL_TRANSDUCTION		339	0.251711	1.1872	0.186613	0.863736	1	1901	tags=17%, list=11%, signal=18%
GO_PEPTIDYL_THREONINE_MODIFICATION	GO_PEPTIDYL_THREONINE_MODIFICATION		44	0.337052	1.18691	0.233663	0.863051	1	3366	tags=36%, list=19%, signal=45%
GO_DNA_REPAIR	GO_DNA_REPAIR		431	0.315165	1.18633	0.281437	0.863234	1	3939	tags=39%, list=22%, signal=49%
GO_COATED_VESICLE_MEMBRANE	GO_COATED_VESICLE_MEMBRANE		133	0.294153	1.18617	0.235178	0.862089	1	2717	tags=23%, list=15%, signal=26%
GO_POSITIVE_REGULATION_OF_DNA_REPLICATION	GO_POSITIVE_REGULATION_OF_DNA_REPLICATION		84	0.281041	1.1856	0.221359	0.862296	1	4386	tags=33%, list=25%, signal=44%
GO_NEGATIVE_REGULATION_OF_LIPID_BIOSYNTHETIC_PROCESS	GO_NEGATIVE_REGULATION_OF_LIPID_BIOSYNTHETIC_PROCESS		41	0.306929	1.18513	0.207843	0.862151	1	1581	tags=17%, list=9%, signal=19%
GO_BINDING_OF_SPERM_TO_ZONA_PELLUCIDA	GO_BINDING_OF_SPERM_TO_ZONA_PELLUCIDA		28	0.382457	1.18422	0.257692	0.863624	1	6130	tags=54%, list=35%, signal=82%
GO_TRANSFERASE_ACTIVITY_TRANSFERRING_ALKYL_OR_ARYL_OTHER_THAN_METHYL_GROUPS	GO_TRANSFERASE_ACTIVITY_TRANSFERRING_ALKYL_OR_ARYL_OTHER_THAN_METHYL_GROUPS		57	0.342996	1.18419	0.248092	0.862089	1	4070	tags=35%, list=23%, signal=45%
GO_CILIARY_TRANSITION_ZONE	GO_CILIARY_TRANSITION_ZONE		23	0.397092	1.184	0.268924	0.861069	1	4605	tags=52%, list=26%, signal=70%
GO_POSITIVE_REGULATION_OF_CELL_DIVISION	GO_POSITIVE_REGULATION_OF_CELL_DIVISION		113	0.268802	1.18321	0.18146	0.86201	1	3368	tags=22%, list=19%, signal=27%
GO_GLUTAMINE_FAMILY_AMINO_ACID_CATABOLIC_PROCESS	GO_GLUTAMINE_FAMILY_AMINO_ACID_CATABOLIC_PROCESS		23	0.371879	1.18263	0.240777	0.862216	1	2195	tags=22%, list=12%, signal=25%
GO_OXIDOREDUCTASE_ACTIVITY_ACTING_ON_A_SULFUR_GROUP_OF_DONORS	GO_OXIDOREDUCTASE_ACTIVITY_ACTING_ON_A_SULFUR_GROUP_OF_DONORS		43	0.356131	1.18254	0.281437	0.860931	1	4042	tags=42%, list=23%, signal=54%
GO_AMINO_SUGAR_METABOLIC_PROCESS	GO_AMINO_SUGAR_METABOLIC_PROCESS		38	0.322755	1.18214	0.244576	0.86059	1	2308	tags=24%, list=13%, signal=27%
GO_PHOSPHATASE_REGULATOR_ACTIVITY	GO_PHOSPHATASE_REGULATOR_ACTIVITY		82	0.278796	1.18143	0.177165	0.861283	1	3426	tags=29%, list=19%, signal=36%
GO_NEGATIVE_REGULATION_OF_EXOCYTOSIS	GO_NEGATIVE_REGULATION_OF_EXOCYTOSIS		26	0.361074	1.18123	0.254132	0.860288	1	2553	tags=27%, list=14%, signal=31%
GO_SERTOLI_CELL_DEVELOPMENT	GO_SERTOLI_CELL_DEVELOPMENT		15	0.420705	1.17965	0.280318	0.863738	1	4110	tags=47%, list=23%, signal=61%
GO_UNFOLDED_PROTEIN_BINDING	GO_UNFOLDED_PROTEIN_BINDING		85	0.352152	1.17959	0.279208	0.862367	1	3498	tags=32%, list=20%, signal=39%
GO_REGULATION_OF_ALTERNATIVE_MRNA_SPLICING_VIA_SPLICEOSOME	GO_REGULATION_OF_ALTERNATIVE_MRNA_SPLICING_VIA_SPLICEOSOME		32	0.365958	1.17958	0.270217	0.860789	1	2722	tags=25%, list=15%, signal=30%
GO_TRNA_TRANSPORT	GO_TRNA_TRANSPORT		32	0.434826	1.17897	0.322515	0.861205	1	3581	tags=53%, list=20%, signal=67%
GO_ERAD_PATHWAY	GO_ERAD_PATHWAY		70	0.307122	1.17872	0.258687	0.860514	1	3871	tags=41%, list=22%, signal=53%
GO_TETRAHYDROFOLATE_METABOLIC_PROCESS	GO_TETRAHYDROFOLATE_METABOLIC_PROCESS		19	0.424081	1.17751	0.287379	0.862683	1	2488	tags=26%, list=14%, signal=31%
GO_NEGATIVE_REGULATION_OF_CELL_CYCLE	GO_NEGATIVE_REGULATION_OF_CELL_CYCLE		401	0.232346	1.17691	0.167653	0.863037	1	3953	tags=30%, list=22%, signal=37%
GO_CYTOPLASMIC_MRNA_PROCESSING_BODY	GO_CYTOPLASMIC_MRNA_PROCESSING_BODY		62	0.297924	1.17684	0.236434	0.861689	1	3600	tags=35%, list=20%, signal=44%
GO_PHOSPHATIDYLINOSITOL_PHOSPHATE_KINASE_ACTIVITY	GO_PHOSPHATIDYLINOSITOL_PHOSPHATE_KINASE_ACTIVITY		15	0.447849	1.17677	0.272349	0.860369	1	2614	tags=40%, list=15%, signal=47%
GO_PTERIDINE_CONTAINING_COMPOUND_METABOLIC_PROCESS	GO_PTERIDINE_CONTAINING_COMPOUND_METABOLIC_PROCESS		34	0.383494	1.17676	0.273423	0.858818	1	2645	tags=26%, list=15%, signal=31%
GO_TRANSLATION_ELONGATION_FACTOR_ACTIVITY	GO_TRANSLATION_ELONGATION_FACTOR_ACTIVITY		19	0.422749	1.1767	0.285156	0.857488	1	2841	tags=37%, list=16%, signal=44%
GO_PROTEIN_TRANSPORT_ALONG_MICROTUBULE	GO_PROTEIN_TRANSPORT_ALONG_MICROTUBULE		26	0.403858	1.17659	0.29	0.856306	1	3593	tags=42%, list=20%, signal=53%
GO_LYSOSOMAL_TRANSPORT	GO_LYSOSOMAL_TRANSPORT		65	0.298702	1.17644	0.234086	0.855197	1	3183	tags=32%, list=18%, signal=39%
GO_POSITIVE_REGULATION_OF_CARDIAC_MUSCLE_CELL_PROLIFERATION	GO_POSITIVE_REGULATION_OF_CARDIAC_MUSCLE_CELL_PROLIFERATION		18	0.396495	1.17497	0.238494	0.858176	1	1762	tags=22%, list=10%, signal=25%
GO_AU_RICH_ELEMENT_BINDING	GO_AU_RICH_ELEMENT_BINDING		22	0.368535	1.17431	0.265469	0.858776	1	1916	tags=27%, list=11%, signal=31%
GO_CAJAL_BODY	GO_CAJAL_BODY		49	0.363877	1.17383	0.284	0.858828	1	2124	tags=27%, list=12%, signal=30%
GO_NUCLEAR_CHROMOSOME	GO_NUCLEAR_CHROMOSOME		481	0.292676	1.1735	0.276986	0.85834	1	3371	tags=33%, list=19%, signal=40%
GO_FIBROBLAST_GROWTH_FACTOR_BINDING	GO_FIBROBLAST_GROWTH_FACTOR_BINDING		23	0.364818	1.17289	0.263889	0.858637	1	827	tags=13%, list=5%, signal=14%
GO_RNA_CATABOLIC_PROCESS	GO_RNA_CATABOLIC_PROCESS		216	0.354646	1.17213	0.33002	0.859406	1	4189	tags=37%, list=24%, signal=47%
GO_SCF_UBIQUITIN_LIGASE_COMPLEX	GO_SCF_UBIQUITIN_LIGASE_COMPLEX		32	0.331417	1.17198	0.252016	0.858331	1	1377	tags=19%, list=8%, signal=20%
GO_NEGATIVE_REGULATION_OF_CELL_CYCLE_PHASE_TRANSITION	GO_NEGATIVE_REGULATION_OF_CELL_CYCLE_PHASE_TRANSITION		136	0.279263	1.17187	0.253061	0.857153	1	3607	tags=31%, list=20%, signal=39%
GO_ATPASE_ACTIVITY	GO_ATPASE_ACTIVITY		410	0.266076	1.1715	0.233663	0.856782	1	3497	tags=28%, list=20%, signal=34%
GO_G1_DNA_DAMAGE_CHECKPOINT	GO_G1_DNA_DAMAGE_CHECKPOINT		68	0.319542	1.17138	0.259101	0.855593	1	3607	tags=34%, list=20%, signal=42%
GO_MEMBRANE_FUSION	GO_MEMBRANE_FUSION		140	0.263216	1.1713	0.218107	0.854334	1	3929	tags=28%, list=22%, signal=36%
GO_CYSTEINE_TYPE_ENDOPEPTIDASE_ACTIVITY	GO_CYSTEINE_TYPE_ENDOPEPTIDASE_ACTIVITY		79	0.27795	1.17064	0.221557	0.854911	1	3753	tags=33%, list=21%, signal=42%
GO_PEPTIDYL_LYSINE_MODIFICATION	GO_PEPTIDYL_LYSINE_MODIFICATION		274	0.280592	1.17044	0.240557	0.854024	1	3780	tags=38%, list=21%, signal=47%
GO_PHOSPHATIDYLINOSITOL_3_PHOSPHATE_BIOSYNTHETIC_PROCESS	GO_PHOSPHATIDYLINOSITOL_3_PHOSPHATE_BIOSYNTHETIC_PROCESS		47	0.369214	1.16909	0.278481	0.85675	1	5586	tags=45%, list=32%, signal=65%
GO_REGULATION_OF_MICROTUBULE_BASED_PROCESS	GO_REGULATION_OF_MICROTUBULE_BASED_PROCESS		225	0.276516	1.16843	0.279528	0.857283	1	3718	tags=32%, list=21%, signal=41%
GO_CATION_TRANSPORTING_ATPASE_ACTIVITY	GO_CATION_TRANSPORTING_ATPASE_ACTIVITY		58	0.325	1.16842	0.25	0.855828	1	3007	tags=26%, list=17%, signal=31%
GO_NUCLEOTIDE_EXCISION_REPAIR	GO_NUCLEOTIDE_EXCISION_REPAIR		111	0.337408	1.16839	0.306163	0.854425	1	3973	tags=42%, list=22%, signal=54%
GO_TRANSCRIPTION_COFACTOR_BINDING	GO_TRANSCRIPTION_COFACTOR_BINDING		23	0.369522	1.1683	0.236735	0.853174	1	1094	tags=22%, list=6%, signal=23%
GO_REGULATION_OF_SIGNAL_TRANSDUCTION_BY_P53_CLASS_MEDIATOR	GO_REGULATION_OF_SIGNAL_TRANSDUCTION_BY_P53_CLASS_MEDIATOR		155	0.284737	1.16686	0.252525	0.856401	1	3939	tags=36%, list=22%, signal=46%
GO_KINASE_INHIBITOR_ACTIVITY	GO_KINASE_INHIBITOR_ACTIVITY		84	0.284274	1.16598	0.224949	0.857667	1	3771	tags=32%, list=21%, signal=41%
GO_POSITIVE_REGULATION_OF_VIRAL_GENOME_REPLICATION	GO_POSITIVE_REGULATION_OF_VIRAL_GENOME_REPLICATION		29	0.331518	1.16581	0.250526	0.856707	1	4181	tags=38%, list=24%, signal=50%
GO_ISOPRENOID_BIOSYNTHETIC_PROCESS	GO_ISOPRENOID_BIOSYNTHETIC_PROCESS		23	0.411723	1.16573	0.304094	0.855467	1	2511	tags=30%, list=14%, signal=35%
GO_MEIOTIC_CELL_CYCLE	GO_MEIOTIC_CELL_CYCLE		152	0.308839	1.16315	0.264646	0.861861	1	4273	tags=36%, list=24%, signal=46%
GO_BLASTOCYST_GROWTH	GO_BLASTOCYST_GROWTH		15	0.43048	1.16302	0.308008	0.860761	1	3512	tags=40%, list=20%, signal=50%
GO_REGULATION_OF_MICROTUBULE_POLYMERIZATION_OR_DEPOLYMERIZATION	GO_REGULATION_OF_MICROTUBULE_POLYMERIZATION_OR_DEPOLYMERIZATION		163	0.284141	1.16268	0.263581	0.860379	1	3617	tags=33%, list=20%, signal=41%
GO_REGULATION_OF_PROTEIN_UBIQUITINATION_INVOLVED_IN_UBIQUITIN_DEPENDENT_PROTEIN_CATABOLIC_PROCESS	GO_REGULATION_OF_PROTEIN_UBIQUITINATION_INVOLVED_IN_UBIQUITIN_DEPENDENT_PROTEIN_CATABOLIC_PROCESS		101	0.352447	1.16206	0.319608	0.860812	1	1988	tags=26%, list=11%, signal=29%
GO_NEGATIVE_REGULATION_OF_JNK_CASCADE	GO_NEGATIVE_REGULATION_OF_JNK_CASCADE		32	0.33687	1.16082	0.252485	0.863158	1	3586	tags=38%, list=20%, signal=47%
GO_REGULATION_OF_GLUCOSE_IMPORT	GO_REGULATION_OF_GLUCOSE_IMPORT		55	0.301864	1.15952	0.263158	0.865671	1	1582	tags=20%, list=9%, signal=22%
GO_NEGATIVE_REGULATION_OF_PROTEIN_COMPLEX_DISASSEMBLY	GO_NEGATIVE_REGULATION_OF_PROTEIN_COMPLEX_DISASSEMBLY		154	0.283633	1.1593	0.264646	0.864904	1	3648	tags=31%, list=21%, signal=38%
GO_NUCLEOBASE_CONTAINING_COMPOUND_KINASE_ACTIVITY	GO_NUCLEOBASE_CONTAINING_COMPOUND_KINASE_ACTIVITY		45	0.313463	1.15923	0.247012	0.86369	1	3294	tags=27%, list=19%, signal=33%
GO_PROTEIN_DEGLYCOSYLATION	GO_PROTEIN_DEGLYCOSYLATION		21	0.379841	1.159	0.283784	0.862932	1	3884	tags=52%, list=22%, signal=67%
GO_MEDIATOR_COMPLEX	GO_MEDIATOR_COMPLEX		34	0.331986	1.15776	0.254902	0.86528	1	1986	tags=26%, list=11%, signal=30%
GO_RECYCLING_ENDOSOME_MEMBRANE	GO_RECYCLING_ENDOSOME_MEMBRANE		38	0.332313	1.15738	0.265594	0.86494	1	1969	tags=26%, list=11%, signal=30%
GO_CHROMATIN_REMODELING	GO_CHROMATIN_REMODELING		139	0.300686	1.15729	0.274949	0.863784	1	3646	tags=35%, list=21%, signal=44%
GO_REGULATION_OF_CYCLIN_DEPENDENT_PROTEIN_KINASE_ACTIVITY	GO_REGULATION_OF_CYCLIN_DEPENDENT_PROTEIN_KINASE_ACTIVITY		93	0.27034	1.15624	0.241584	0.865571	1	1095	tags=15%, list=6%, signal=16%
GO_CENTROSOME_CYCLE	GO_CENTROSOME_CYCLE		44	0.386145	1.15619	0.336016	0.864267	1	4630	tags=50%, list=26%, signal=68%
GO_LUNG_CELL_DIFFERENTIATION	GO_LUNG_CELL_DIFFERENTIATION		25	0.349341	1.15582	0.258517	0.863986	1	4413	tags=40%, list=25%, signal=53%
GO_REGULATION_OF_PHOSPHATASE_ACTIVITY	GO_REGULATION_OF_PHOSPHATASE_ACTIVITY		115	0.262904	1.15569	0.226994	0.862939	1	3691	tags=30%, list=21%, signal=37%
GO_POSITIVE_REGULATION_OF_MRNA_3_END_PROCESSING	GO_POSITIVE_REGULATION_OF_MRNA_3_END_PROCESSING		16	0.395722	1.15558	0.313725	0.861809	1	2451	tags=31%, list=14%, signal=36%
GO_VESICLE_LOCALIZATION	GO_VESICLE_LOCALIZATION		215	0.256702	1.15418	0.220238	0.86441	1	2810	tags=21%, list=16%, signal=25%
GO_REGULATION_OF_CHROMOSOME_ORGANIZATION	GO_REGULATION_OF_CHROMOSOME_ORGANIZATION		260	0.262889	1.15415	0.2751	0.863049	1	3780	tags=32%, list=21%, signal=40%
GO_POSITIVE_REGULATION_OF_CELL_CYCLE	GO_POSITIVE_REGULATION_OF_CELL_CYCLE		304	0.241191	1.15192	0.228963	0.86869	1	3607	tags=26%, list=20%, signal=33%
GO_NUCLEOTIDE_TRANSPORT	GO_NUCLEOTIDE_TRANSPORT		25	0.349136	1.15172	0.274472	0.867831	1	2620	tags=28%, list=15%, signal=33%
GO_REGULATION_OF_MRNA_3_END_PROCESSING	GO_REGULATION_OF_MRNA_3_END_PROCESSING		26	0.372618	1.15163	0.307992	0.866701	1	4226	tags=50%, list=24%, signal=66%
GO_NUCLEASE_ACTIVITY	GO_NUCLEASE_ACTIVITY		185	0.29355	1.15156	0.295858	0.865461	1	3205	tags=28%, list=18%, signal=33%
GO_POSITIVE_REGULATION_OF_CIRCADIAN_RHYTHM	GO_POSITIVE_REGULATION_OF_CIRCADIAN_RHYTHM		18	0.381175	1.1515	0.292969	0.864213	1	6268	tags=50%, list=35%, signal=77%
GO_GLUCOSAMINE_CONTAINING_COMPOUND_METABOLIC_PROCESS	GO_GLUCOSAMINE_CONTAINING_COMPOUND_METABOLIC_PROCESS		24	0.345341	1.15135	0.270161	0.863246	1	2308	tags=29%, list=13%, signal=34%
GO_REGULATION_OF_PLASMA_MEMBRANE_ORGANIZATION	GO_REGULATION_OF_PLASMA_MEMBRANE_ORGANIZATION		71	0.282358	1.14934	0.240246	0.867929	1	1612	tags=20%, list=9%, signal=22%
GO_ORGANELLE_FUSION	GO_ORGANELLE_FUSION		121	0.257573	1.14908	0.243243	0.867259	1	3929	tags=27%, list=22%, signal=35%
GO_NEGATIVE_REGULATION_OF_DNA_METABOLIC_PROCESS	GO_NEGATIVE_REGULATION_OF_DNA_METABOLIC_PROCESS		104	0.281046	1.14888	0.268482	0.866418	1	3221	tags=28%, list=18%, signal=34%
GO_LIGASE_ACTIVITY_FORMING_CARBON_OXYGEN_BONDS	GO_LIGASE_ACTIVITY_FORMING_CARBON_OXYGEN_BONDS		44	0.397183	1.14749	0.318533	0.86919	1	3943	tags=41%, list=22%, signal=53%
GO_POSITIVE_REGULATION_OF_TOLL_LIKE_RECEPTOR_SIGNALING_PATHWAY	GO_POSITIVE_REGULATION_OF_TOLL_LIKE_RECEPTOR_SIGNALING_PATHWAY		19	0.383865	1.14738	0.291837	0.868127	1	4747	tags=42%, list=27%, signal=58%
GO_ADENYLYLTRANSFERASE_ACTIVITY	GO_ADENYLYLTRANSFERASE_ACTIVITY		23	0.352566	1.14643	0.259843	0.869569	1	3357	tags=35%, list=19%, signal=43%
GO_METHYLATION	GO_METHYLATION		228	0.274837	1.14624	0.27668	0.868723	1	3780	tags=34%, list=21%, signal=42%
GO_GAMETE_GENERATION	GO_GAMETE_GENERATION		456	0.22433	1.14598	0.154	0.868084	1	3945	tags=26%, list=22%, signal=32%
GO_ENDOSOMAL_PART	GO_ENDOSOMAL_PART		399	0.247776	1.14446	0.248945	0.871208	1	2041	tags=19%, list=12%, signal=21%
GO_CELLULAR_PIGMENTATION	GO_CELLULAR_PIGMENTATION		43	0.30085	1.14352	0.262425	0.872786	1	3183	tags=30%, list=18%, signal=37%
GO_SPINDLE_ASSEMBLY	GO_SPINDLE_ASSEMBLY		67	0.338117	1.14346	0.311609	0.871537	1	3617	tags=37%, list=20%, signal=47%
GO_NUCLEOBASE_CONTAINING_COMPOUND_TRANSPORT	GO_NUCLEOBASE_CONTAINING_COMPOUND_TRANSPORT		185	0.291496	1.14159	0.302419	0.875887	1	3080	tags=28%, list=17%, signal=34%
GO_N_GLYCAN_PROCESSING	GO_N_GLYCAN_PROCESSING		19	0.372304	1.14113	0.305284	0.875944	1	2591	tags=32%, list=15%, signal=37%
GO_NEGATIVE_REGULATION_OF_B_CELL_PROLIFERATION	GO_NEGATIVE_REGULATION_OF_B_CELL_PROLIFERATION		15	0.422218	1.14113	0.325956	0.874522	1	955	tags=20%, list=5%, signal=21%
GO_AMIDE_BIOSYNTHETIC_PROCESS	GO_AMIDE_BIOSYNTHETIC_PROCESS		479	0.335371	1.14078	0.346979	0.874144	1	4151	tags=36%, list=24%, signal=46%
GO_MICROTUBULE_BASED_MOVEMENT	GO_MICROTUBULE_BASED_MOVEMENT		191	0.25502	1.14047	0.238462	0.873621	1	3593	tags=27%, list=20%, signal=34%
GO_REGULATION_OF_AUTOPHAGY	GO_REGULATION_OF_AUTOPHAGY		242	0.234227	1.14004	0.245763	0.873536	1	1955	tags=17%, list=11%, signal=19%
GO_ENDOSOME_ORGANIZATION	GO_ENDOSOME_ORGANIZATION		59	0.304341	1.14001	0.275654	0.872209	1	3166	tags=36%, list=18%, signal=43%
GO_CELLULAR_RESPONSE_TO_STARVATION	GO_CELLULAR_RESPONSE_TO_STARVATION		109	0.261286	1.13838	0.258333	0.876007	1	2895	tags=24%, list=16%, signal=28%
GO_SMOOTH_ENDOPLASMIC_RETICULUM	GO_SMOOTH_ENDOPLASMIC_RETICULUM		33	0.324672	1.13767	0.269531	0.876696	1	4089	tags=30%, list=23%, signal=39%
GO_REGULATION_OF_VACUOLE_ORGANIZATION	GO_REGULATION_OF_VACUOLE_ORGANIZATION		40	0.304434	1.13704	0.289683	0.877077	1	1612	tags=20%, list=9%, signal=22%
GO_CELL_SEPARATION_AFTER_CYTOKINESIS	GO_CELL_SEPARATION_AFTER_CYTOKINESIS		17	0.411208	1.13644	0.303571	0.877378	1	3030	tags=53%, list=17%, signal=64%
GO_METHIONINE_METABOLIC_PROCESS	GO_METHIONINE_METABOLIC_PROCESS		18	0.385159	1.13525	0.310621	0.87966	1	3496	tags=39%, list=20%, signal=48%
GO_REGULATION_OF_CELL_AGING	GO_REGULATION_OF_CELL_AGING		32	0.31802	1.1351	0.279762	0.878695	1	2425	tags=28%, list=14%, signal=33%
GO_TRANSCRIPTION_INITIATION_FROM_RNA_POLYMERASE_II_PROMOTER	GO_TRANSCRIPTION_INITIATION_FROM_RNA_POLYMERASE_II_PROMOTER		150	0.245043	1.13473	0.23622	0.878433	1	3544	tags=29%, list=20%, signal=36%
GO_POSITIVE_REGULATION_OF_CELL_CYCLE_G1_S_PHASE_TRANSITION	GO_POSITIVE_REGULATION_OF_CELL_CYCLE_G1_S_PHASE_TRANSITION		28	0.328941	1.13392	0.2818	0.879604	1	1497	tags=21%, list=8%, signal=23%
GO_OXIDOREDUCTASE_COMPLEX	GO_OXIDOREDUCTASE_COMPLEX		90	0.392446	1.13364	0.4	0.879075	1	3401	tags=37%, list=19%, signal=45%
GO_NEGATIVE_REGULATION_OF_CELL_CYCLE_G1_S_PHASE_TRANSITION	GO_NEGATIVE_REGULATION_OF_CELL_CYCLE_G1_S_PHASE_TRANSITION		92	0.270889	1.13331	0.267635	0.878713	1	3607	tags=27%, list=20%, signal=34%
GO_EXOSOME_RNASE_COMPLEX_	GO_EXOSOME_RNASE_COMPLEX_		21	0.419948	1.13325	0.378431	0.877492	1	2089	tags=33%, list=12%, signal=38%
GO_NEGATIVE_REGULATION_OF_PROTEIN_ACETYLATION	GO_NEGATIVE_REGULATION_OF_PROTEIN_ACETYLATION		19	0.346889	1.13195	0.276	0.880075	1	1898	tags=26%, list=11%, signal=29%
GO_MICROBODY_LUMEN	GO_MICROBODY_LUMEN		43	0.35825	1.1317	0.325103	0.879457	1	3178	tags=30%, list=18%, signal=37%
GO_GLYCEROLIPID_BIOSYNTHETIC_PROCESS	GO_GLYCEROLIPID_BIOSYNTHETIC_PROCESS		201	0.237269	1.13044	0.226378	0.881808	1	3094	tags=23%, list=18%, signal=28%
GO_RECEPTOR_SIGNALING_PROTEIN_SERINE_THREONINE_KINASE_ACTIVITY	GO_RECEPTOR_SIGNALING_PROTEIN_SERINE_THREONINE_KINASE_ACTIVITY		85	0.287009	1.13017	0.281188	0.881257	1	3475	tags=34%, list=20%, signal=42%
GO_METAL_CLUSTER_BINDING	GO_METAL_CLUSTER_BINDING		60	0.349212	1.12991	0.331325	0.880629	1	2676	tags=35%, list=15%, signal=41%
GO_NEGATIVE_REGULATION_OF_MYELOID_CELL_DIFFERENTIATION	GO_NEGATIVE_REGULATION_OF_MYELOID_CELL_DIFFERENTIATION		80	0.31199	1.12967	0.276553	0.87993	1	3880	tags=38%, list=22%, signal=48%
GO_PROTEIN_KINASE_A_REGULATORY_SUBUNIT_BINDING	GO_PROTEIN_KINASE_A_REGULATORY_SUBUNIT_BINDING		16	0.400013	1.12954	0.296748	0.878951	1	4356	tags=50%, list=25%, signal=66%
GO_RNA_DEPENDENT_DNA_BIOSYNTHETIC_PROCESS	GO_RNA_DEPENDENT_DNA_BIOSYNTHETIC_PROCESS		20	0.371705	1.12948	0.320329	0.877794	1	4181	tags=45%, list=24%, signal=59%
GO_NUCLEAR_SPECK	GO_NUCLEAR_SPECK		188	0.275041	1.12898	0.303644	0.877989	1	3709	tags=31%, list=21%, signal=39%
GO_MITOCHONDRIAL_FUSION	GO_MITOCHONDRIAL_FUSION		15	0.41216	1.12892	0.311412	0.876792	1	883	tags=20%, list=5%, signal=21%
GO_MAGNESIUM_ION_BINDING	GO_MAGNESIUM_ION_BINDING		186	0.235839	1.12809	0.228175	0.877892	1	2721	tags=23%, list=15%, signal=26%
GO_NEGATIVE_REGULATION_OF_POTASSIUM_ION_TRANSMEMBRANE_TRANSPORT	GO_NEGATIVE_REGULATION_OF_POTASSIUM_ION_TRANSMEMBRANE_TRANSPORT		19	0.389901	1.12807	0.295918	0.876605	1	4939	tags=42%, list=28%, signal=58%
GO_TRANSITION_METAL_ION_TRANSMEMBRANE_TRANSPORTER_ACTIVITY	GO_TRANSITION_METAL_ION_TRANSMEMBRANE_TRANSPORTER_ACTIVITY		38	0.322432	1.12786	0.280561	0.87589	1	2573	tags=26%, list=15%, signal=31%
GO_SINGLE_STRANDED_RNA_BINDING	GO_SINGLE_STRANDED_RNA_BINDING		62	0.298387	1.12707	0.292829	0.876945	1	3709	tags=35%, list=21%, signal=45%
GO_CHLORIDE_CHANNEL_REGULATOR_ACTIVITY	GO_CHLORIDE_CHANNEL_REGULATOR_ACTIVITY		15	0.371166	1.12692	0.314402	0.876027	1	5211	tags=47%, list=30%, signal=66%
GO_REGULATION_OF_ORGANELLE_ASSEMBLY	GO_REGULATION_OF_ORGANELLE_ASSEMBLY		139	0.246916	1.12638	0.264151	0.876242	1	2840	tags=23%, list=16%, signal=27%
GO_MITOTIC_SPINDLE_ASSEMBLY	GO_MITOTIC_SPINDLE_ASSEMBLY		39	0.350913	1.12624	0.350701	0.875273	1	4847	tags=46%, list=27%, signal=63%
GO_MEIOSIS_I	GO_MEIOSIS_I		69	0.321513	1.12582	0.315151	0.87515	1	3872	tags=32%, list=22%, signal=41%
GO_CELLULAR_RESPONSE_TO_GLUCOSE_STARVATION	GO_CELLULAR_RESPONSE_TO_GLUCOSE_STARVATION		30	0.325536	1.12558	0.30297	0.874515	1	3136	tags=27%, list=18%, signal=32%
GO_MRNA_PROCESSING	GO_MRNA_PROCESSING		402	0.300624	1.12373	0.314741	0.878566	1	3379	tags=32%, list=19%, signal=39%
GO_POSITIVE_REGULATION_OF_MRNA_METABOLIC_PROCESS	GO_POSITIVE_REGULATION_OF_MRNA_METABOLIC_PROCESS		42	0.31728	1.12372	0.304348	0.877239	1	2451	tags=26%, list=14%, signal=30%
GO_GOLGI_CISTERNA_MEMBRANE	GO_GOLGI_CISTERNA_MEMBRANE		70	0.286673	1.12357	0.293542	0.876347	1	1933	tags=19%, list=11%, signal=21%
GO_NECROPTOTIC_PROCESS	GO_NECROPTOTIC_PROCESS		21	0.389333	1.12315	0.32	0.876182	1	2349	tags=29%, list=13%, signal=33%
GO_CHROMATIN	GO_CHROMATIN		402	0.2705	1.12308	0.324111	0.875083	1	3761	tags=35%, list=21%, signal=43%
GO_SNAP_RECEPTOR_ACTIVITY	GO_SNAP_RECEPTOR_ACTIVITY		38	0.31092	1.12263	0.317907	0.875074	1	3166	tags=34%, list=18%, signal=42%
GO_POLYPEPTIDE_N_ACETYLGALACTOSAMINYLTRANSFERASE_ACTIVITY	GO_POLYPEPTIDE_N_ACETYLGALACTOSAMINYLTRANSFERASE_ACTIVITY		16	0.42613	1.12212	0.336557	0.875303	1	3891	tags=31%, list=22%, signal=40%
GO_VACUOLE_ORGANIZATION	GO_VACUOLE_ORGANIZATION		156	0.258171	1.12153	0.265823	0.875705	1	3183	tags=30%, list=18%, signal=36%
GO_DAMAGED_DNA_BINDING	GO_DAMAGED_DNA_BINDING		62	0.338517	1.12125	0.346154	0.875187	1	3881	tags=35%, list=22%, signal=45%
GO_SNRNA_BINDING	GO_SNRNA_BINDING		33	0.35436	1.12113	0.327651	0.874209	1	1589	tags=21%, list=9%, signal=23%
GO_ORGANOPHOSPHATE_BIOSYNTHETIC_PROCESS	GO_ORGANOPHOSPHATE_BIOSYNTHETIC_PROCESS		420	0.235317	1.12055	0.245545	0.874614	1	2931	tags=23%, list=17%, signal=27%
GO_SEX_CHROMOSOME	GO_SEX_CHROMOSOME		26	0.358352	1.11882	0.325397	0.878589	1	4097	tags=50%, list=23%, signal=65%
GO_REGULATION_OF_RECEPTOR_BIOSYNTHETIC_PROCESS	GO_REGULATION_OF_RECEPTOR_BIOSYNTHETIC_PROCESS		21	0.333149	1.11873	0.29249	0.87753	1	3878	tags=38%, list=22%, signal=49%
GO_LIPID_BIOSYNTHETIC_PROCESS	GO_LIPID_BIOSYNTHETIC_PROCESS		495	0.229698	1.11849	0.239919	0.876948	1	2671	tags=19%, list=15%, signal=22%
GO_ACETYLTRANSFERASE_ACTIVITY	GO_ACETYLTRANSFERASE_ACTIVITY		91	0.275046	1.11818	0.272374	0.876524	1	3599	tags=33%, list=20%, signal=41%
GO_VOLTAGE_GATED_ANION_CHANNEL_ACTIVITY	GO_VOLTAGE_GATED_ANION_CHANNEL_ACTIVITY		16	0.390611	1.11813	0.321569	0.875386	1	903	tags=19%, list=5%, signal=20%
GO_MITOCHONDRIAL_TRANSLATION	GO_MITOCHONDRIAL_TRANSLATION		104	0.444893	1.11773	0.418146	0.875234	1	4403	tags=48%, list=25%, signal=64%
GO_NEGATIVE_REGULATION_OF_ORGANELLE_ORGANIZATION	GO_NEGATIVE_REGULATION_OF_ORGANELLE_ORGANIZATION		358	0.238954	1.11734	0.283673	0.875117	1	3661	tags=28%, list=21%, signal=35%
GO_HYDRO_LYASE_ACTIVITY	GO_HYDRO_LYASE_ACTIVITY		43	0.337902	1.11701	0.314501	0.874816	1	2424	tags=23%, list=14%, signal=27%
GO_VACUOLAR_TRANSPORT	GO_VACUOLAR_TRANSPORT		230	0.245513	1.11688	0.282787	0.873924	1	3183	tags=28%, list=18%, signal=34%
GO_CELLULAR_RESPONSE_TO_HYDROGEN_PEROXIDE	GO_CELLULAR_RESPONSE_TO_HYDROGEN_PEROXIDE		60	0.278775	1.11685	0.284872	0.87268	1	2466	tags=23%, list=14%, signal=27%
GO_NEURAL_NUCLEUS_DEVELOPMENT	GO_NEURAL_NUCLEUS_DEVELOPMENT		64	0.295084	1.1168	0.315789	0.871551	1	1668	tags=17%, list=9%, signal=19%
GO_NADP_BINDING	GO_NADP_BINDING		41	0.311529	1.11596	0.309198	0.872761	1	3355	tags=32%, list=19%, signal=39%
GO_CELLULAR_RESPONSE_TO_ANTIBIOTIC	GO_CELLULAR_RESPONSE_TO_ANTIBIOTIC		16	0.371403	1.11569	0.325301	0.872262	1	2794	tags=25%, list=16%, signal=30%
GO_PEPTIDYL_LYSINE_TRIMETHYLATION	GO_PEPTIDYL_LYSINE_TRIMETHYLATION		18	0.430124	1.11557	0.366197	0.871318	1	3761	tags=50%, list=21%, signal=63%
GO_PHOSPHORIC_ESTER_HYDROLASE_ACTIVITY	GO_PHOSPHORIC_ESTER_HYDROLASE_ACTIVITY		338	0.226213	1.11544	0.241379	0.870389	1	4560	tags=30%, list=26%, signal=40%
GO_REGULATION_OF_GRANULOCYTE_MACROPHAGE_COLONY_STIMULATING_FACTOR_PRODUCTION	GO_REGULATION_OF_GRANULOCYTE_MACROPHAGE_COLONY_STIMULATING_FACTOR_PRODUCTION		15	0.434101	1.11488	0.324544	0.870761	1	5713	tags=40%, list=32%, signal=59%
GO_REPRESSING_TRANSCRIPTION_FACTOR_BINDING	GO_REPRESSING_TRANSCRIPTION_FACTOR_BINDING		55	0.276391	1.11387	0.298354	0.872407	1	2777	tags=31%, list=16%, signal=37%
GO_POSITIVE_REGULATION_OF_CELLULAR_AMIDE_METABOLIC_PROCESS	GO_POSITIVE_REGULATION_OF_CELLULAR_AMIDE_METABOLIC_PROCESS		100	0.249305	1.11296	0.265873	0.87394	1	2545	tags=21%, list=14%, signal=24%
GO_ACETYLGLUCOSAMINYLTRANSFERASE_ACTIVITY	GO_ACETYLGLUCOSAMINYLTRANSFERASE_ACTIVITY		44	0.301177	1.11253	0.319767	0.873939	1	2984	tags=25%, list=17%, signal=30%
GO_NEGATIVE_REGULATION_OF_INTRINSIC_APOPTOTIC_SIGNALING_PATHWAY_BY_P53_CLASS_MEDIATOR	GO_NEGATIVE_REGULATION_OF_INTRINSIC_APOPTOTIC_SIGNALING_PATHWAY_BY_P53_CLASS_MEDIATOR		17	0.394	1.11236	0.341797	0.873119	1	3914	tags=47%, list=22%, signal=60%
GO_MACROMOLECULAR_COMPLEX_DISASSEMBLY	GO_MACROMOLECULAR_COMPLEX_DISASSEMBLY		174	0.331821	1.10999	0.405567	0.878789	1	2552	tags=27%, list=14%, signal=31%
GO_DNA_GEOMETRIC_CHANGE	GO_DNA_GEOMETRIC_CHANGE		77	0.352705	1.10983	0.361111	0.877987	1	3920	tags=43%, list=22%, signal=55%
GO_VESICLE_DOCKING_INVOLVED_IN_EXOCYTOSIS	GO_VESICLE_DOCKING_INVOLVED_IN_EXOCYTOSIS		34	0.314881	1.10973	0.306163	0.877031	1	4568	tags=38%, list=26%, signal=51%
GO_GLYCOSYLATION	GO_GLYCOSYLATION		245	0.246289	1.10954	0.294231	0.876277	1	2674	tags=21%, list=15%, signal=24%
GO_CELL_CELL_JUNCTION_ASSEMBLY	GO_CELL_CELL_JUNCTION_ASSEMBLY		71	0.287867	1.10939	0.306613	0.875443	1	2456	tags=24%, list=14%, signal=28%
GO_RNA_LOCALIZATION	GO_RNA_LOCALIZATION		171	0.302894	1.10862	0.324056	0.876472	1	3080	tags=30%, list=17%, signal=36%
GO_XENOPHAGY	GO_XENOPHAGY		98	0.267025	1.1085	0.307102	0.875556	1	4680	tags=35%, list=27%, signal=47%
GO_SPERM_EGG_RECOGNITION	GO_SPERM_EGG_RECOGNITION		37	0.335184	1.10839	0.324272	0.874573	1	6145	tags=49%, list=35%, signal=74%
GO_APOPTOTIC_DNA_FRAGMENTATION	GO_APOPTOTIC_DNA_FRAGMENTATION		15	0.374122	1.10803	0.314928	0.87432	1	1268	tags=20%, list=7%, signal=22%
GO_RNA_SECONDARY_STRUCTURE_UNWINDING	GO_RNA_SECONDARY_STRUCTURE_UNWINDING		39	0.348382	1.10802	0.33463	0.873092	1	1665	tags=26%, list=9%, signal=28%
GO_LIGAND_DEPENDENT_NUCLEAR_RECEPTOR_BINDING	GO_LIGAND_DEPENDENT_NUCLEAR_RECEPTOR_BINDING		23	0.347673	1.10789	0.334038	0.872219	1	5193	tags=52%, list=29%, signal=74%
GO_CELLULAR_CARBOHYDRATE_METABOLIC_PROCESS	GO_CELLULAR_CARBOHYDRATE_METABOLIC_PROCESS		132	0.255405	1.10774	0.288802	0.871381	1	2718	tags=23%, list=15%, signal=27%
GO_TRANSFERASE_ACTIVITY_TRANSFERRING_HEXOSYL_GROUPS	GO_TRANSFERASE_ACTIVITY_TRANSFERRING_HEXOSYL_GROUPS		182	0.251101	1.10766	0.304348	0.870341	1	3891	tags=28%, list=22%, signal=36%
GO_REGULATION_OF_NITRIC_OXIDE_SYNTHASE_ACTIVITY	GO_REGULATION_OF_NITRIC_OXIDE_SYNTHASE_ACTIVITY		48	0.287166	1.10753	0.30101	0.869466	1	1952	tags=21%, list=11%, signal=23%
GO_SNRNA_METABOLIC_PROCESS	GO_SNRNA_METABOLIC_PROCESS		74	0.314701	1.10721	0.311155	0.869188	1	2524	tags=32%, list=14%, signal=38%
GO_NUCLEAR_TRANSCRIPTION_FACTOR_COMPLEX	GO_NUCLEAR_TRANSCRIPTION_FACTOR_COMPLEX		121	0.266564	1.10718	0.293173	0.868026	1	3669	tags=31%, list=21%, signal=39%
GO_DYNEIN_COMPLEX	GO_DYNEIN_COMPLEX		42	0.328867	1.10656	0.316505	0.868499	1	2060	tags=17%, list=12%, signal=19%
GO_PEPTIDYL_ASPARAGINE_MODIFICATION	GO_PEPTIDYL_ASPARAGINE_MODIFICATION		38	0.314207	1.10635	0.301158	0.867928	1	1391	tags=18%, list=8%, signal=20%
GO_CYCLIN_BINDING	GO_CYCLIN_BINDING		19	0.339654	1.10613	0.321012	0.867335	1	4608	tags=37%, list=26%, signal=50%
GO_ENDOPLASMIC_RETICULUM_GOLGI_INTERMEDIATE_COMPARTMENT	GO_ENDOPLASMIC_RETICULUM_GOLGI_INTERMEDIATE_COMPARTMENT		96	0.275824	1.10535	0.3125	0.868419	1	3447	tags=27%, list=20%, signal=33%
GO_ATPASE_ACTIVITY_COUPLED_TO_TRANSMEMBRANE_MOVEMENT_OF_IONS_PHOSPHORYLATIVE_MECHANISM	GO_ATPASE_ACTIVITY_COUPLED_TO_TRANSMEMBRANE_MOVEMENT_OF_IONS_PHOSPHORYLATIVE_MECHANISM		32	0.341423	1.10486	0.332665	0.868648	1	5597	tags=41%, list=32%, signal=59%
GO__DE_NOVO_PROTEIN_FOLDING	GO__DE_NOVO_PROTEIN_FOLDING		17	0.408365	1.10463	0.34433	0.86811	1	3712	tags=41%, list=21%, signal=52%
GO_TRANSCRIPTION_FACTOR_TFIID_COMPLEX	GO_TRANSCRIPTION_FACTOR_TFIID_COMPLEX		23	0.356048	1.10441	0.342412	0.86751	1	4538	tags=43%, list=26%, signal=58%
GO_SPINDLE_CHECKPOINT	GO_SPINDLE_CHECKPOINT		23	0.413145	1.10425	0.384615	0.866785	1	4546	tags=61%, list=26%, signal=82%
GO_PROTEIN_IMPORT_INTO_NUCLEUS_TRANSLOCATION	GO_PROTEIN_IMPORT_INTO_NUCLEUS_TRANSLOCATION		28	0.339613	1.10367	0.308151	0.867321	1	661	tags=14%, list=4%, signal=15%
GO_POSITIVE_REGULATION_OF_PROTEOLYSIS	GO_POSITIVE_REGULATION_OF_PROTEOLYSIS		351	0.239431	1.10347	0.295276	0.866737	1	3275	tags=24%, list=19%, signal=29%
GO_EPIDERMAL_GROWTH_FACTOR_RECEPTOR_SIGNALING_PATHWAY	GO_EPIDERMAL_GROWTH_FACTOR_RECEPTOR_SIGNALING_PATHWAY		53	0.310026	1.10336	0.339431	0.865794	1	3044	tags=28%, list=17%, signal=34%
GO_REGULATION_OF_MEIOTIC_NUCLEAR_DIVISION	GO_REGULATION_OF_MEIOTIC_NUCLEAR_DIVISION		26	0.319812	1.10303	0.314928	0.865517	1	2426	tags=19%, list=14%, signal=22%
GO_TRANSFERASE_ACTIVITY_TRANSFERRING_PENTOSYL_GROUPS	GO_TRANSFERASE_ACTIVITY_TRANSFERRING_PENTOSYL_GROUPS		50	0.282182	1.10294	0.305609	0.864572	1	2995	tags=26%, list=17%, signal=31%
GO_DENDRITE_CYTOPLASM	GO_DENDRITE_CYTOPLASM		16	0.39414	1.10261	0.319838	0.864335	1	229	tags=13%, list=1%, signal=13%
GO_NUCLEAR_HETEROCHROMATIN	GO_NUCLEAR_HETEROCHROMATIN		31	0.334273	1.10254	0.339844	0.863347	1	3371	tags=39%, list=19%, signal=48%
GO_AXONEME_PART	GO_AXONEME_PART		20	0.422313	1.10249	0.380859	0.862286	1	5802	tags=55%, list=33%, signal=82%
GO_RRNA_METHYLATION	GO_RRNA_METHYLATION		15	0.430491	1.10243	0.342742	0.861245	1	1728	tags=33%, list=10%, signal=37%
GO_PROTEIN_REFOLDING	GO_PROTEIN_REFOLDING		19	0.383989	1.10146	0.341948	0.862833	1	3815	tags=32%, list=22%, signal=40%
GO_POSITIVE_REGULATION_OF_COAGULATION	GO_POSITIVE_REGULATION_OF_COAGULATION		24	0.355304	1.10125	0.313609	0.862257	1	2769	tags=21%, list=16%, signal=25%
GO_MICROTUBULE_ASSOCIATED_COMPLEX	GO_MICROTUBULE_ASSOCIATED_COMPLEX		141	0.254177	1.10093	0.299803	0.861963	1	2996	tags=22%, list=17%, signal=26%
GO_MODULATION_BY_VIRUS_OF_HOST_MORPHOLOGY_OR_PHYSIOLOGY	GO_MODULATION_BY_VIRUS_OF_HOST_MORPHOLOGY_OR_PHYSIOLOGY		36	0.309775	1.10084	0.326653	0.860972	1	2447	tags=19%, list=14%, signal=23%
GO_NUCLEOTIDE_EXCISION_REPAIR_DNA_INCISION	GO_NUCLEOTIDE_EXCISION_REPAIR_DNA_INCISION		39	0.35464	1.10038	0.352031	0.861071	1	4130	tags=46%, list=23%, signal=60%
GO_NEGATIVE_REGULATION_OF_TRANSFERASE_ACTIVITY	GO_NEGATIVE_REGULATION_OF_TRANSFERASE_ACTIVITY		339	0.230489	1.09945	0.297872	0.86251	1	1816	tags=16%, list=10%, signal=18%
GO_CELLULAR_GLUCURONIDATION	GO_CELLULAR_GLUCURONIDATION		20	0.433124	1.09921	0.361538	0.862054	1	6292	tags=50%, list=36%, signal=78%
GO_REGULATION_OF_NUCLEASE_ACTIVITY	GO_REGULATION_OF_NUCLEASE_ACTIVITY		23	0.334199	1.09893	0.329293	0.861668	1	1980	tags=22%, list=11%, signal=24%
GO_HISTONE_H4_ACETYLATION	GO_HISTONE_H4_ACETYLATION		41	0.294482	1.09878	0.307692	0.860879	1	1802	tags=24%, list=10%, signal=27%
GO_NUCLEOTIDE_EXCISION_REPAIR_DNA_DUPLEX_UNWINDING	GO_NUCLEOTIDE_EXCISION_REPAIR_DNA_DUPLEX_UNWINDING		22	0.382479	1.09848	0.348337	0.860476	1	3892	tags=41%, list=22%, signal=52%
GO_REGULATION_OF_DNA_REPLICATION	GO_REGULATION_OF_DNA_REPLICATION		153	0.261226	1.09834	0.317365	0.859647	1	4147	tags=33%, list=23%, signal=42%
GO_FIBROBLAST_GROWTH_FACTOR_RECEPTOR_SIGNALING_PATHWAY	GO_FIBROBLAST_GROWTH_FACTOR_RECEPTOR_SIGNALING_PATHWAY		81	0.26489	1.0979	0.286	0.859817	1	3519	tags=26%, list=20%, signal=32%
GO_NUCLEAR_CHROMATIN	GO_NUCLEAR_CHROMATIN		271	0.260972	1.09743	0.327485	0.859985	1	3371	tags=32%, list=19%, signal=39%
GO_ORGANELLAR_SMALL_RIBOSOMAL_SUBUNIT	GO_ORGANELLAR_SMALL_RIBOSOMAL_SUBUNIT		25	0.492196	1.0971	0.440239	0.859749	1	4108	tags=48%, list=23%, signal=62%
GO_TRANSFERASE_ACTIVITY_TRANSFERRING_GLYCOSYL_GROUPS	GO_TRANSFERASE_ACTIVITY_TRANSFERRING_GLYCOSYL_GROUPS		253	0.231376	1.09673	0.280769	0.8596	1	2995	tags=21%, list=17%, signal=24%
GO_TRANSITION_METAL_ION_TRANSPORT	GO_TRANSITION_METAL_ION_TRANSPORT		101	0.266038	1.09638	0.313008	0.859465	1	2573	tags=20%, list=15%, signal=23%
GO_TRANSLATIONAL_TERMINATION	GO_TRANSLATIONAL_TERMINATION		91	0.45256	1.09517	0.429703	0.861784	1	4190	tags=45%, list=24%, signal=59%
GO_REGULATION_OF_TRANSCRIPTION_INITIATION_FROM_RNA_POLYMERASE_II_PROMOTER	GO_REGULATION_OF_TRANSCRIPTION_INITIATION_FROM_RNA_POLYMERASE_II_PROMOTER		23	0.345101	1.09514	0.321637	0.860678	1	3483	tags=35%, list=20%, signal=43%
GO_POSITIVE_REGULATION_OF_DNA_BIOSYNTHETIC_PROCESS	GO_POSITIVE_REGULATION_OF_DNA_BIOSYNTHETIC_PROCESS		57	0.291518	1.09392	0.339921	0.863121	1	4113	tags=37%, list=23%, signal=48%
GO_REGULATION_OF_MRNA_METABOLIC_PROCESS	GO_REGULATION_OF_MRNA_METABOLIC_PROCESS		111	0.285762	1.09369	0.329457	0.862558	1	2451	tags=27%, list=14%, signal=31%
GO_CHROMATIN_MODIFICATION	GO_CHROMATIN_MODIFICATION		484	0.243423	1.09313	0.338552	0.862926	1	3661	tags=31%, list=21%, signal=38%
GO_EMBRYONIC_AXIS_SPECIFICATION	GO_EMBRYONIC_AXIS_SPECIFICATION		33	0.302266	1.09292	0.334661	0.862382	1	3646	tags=30%, list=21%, signal=38%
GO_PHOSPHATIDYLINOSITOL_PHOSPHATE_BINDING	GO_PHOSPHATIDYLINOSITOL_PHOSPHATE_BINDING		110	0.258797	1.09279	0.313646	0.861583	1	1929	tags=16%, list=11%, signal=18%
GO_REGULATION_OF_GENE_SILENCING	GO_REGULATION_OF_GENE_SILENCING		50	0.330896	1.09211	0.355469	0.862383	1	2933	tags=34%, list=17%, signal=41%
GO_POSITIVE_REGULATION_OF_NUCLEOCYTOPLASMIC_TRANSPORT	GO_POSITIVE_REGULATION_OF_NUCLEOCYTOPLASMIC_TRANSPORT		118	0.244364	1.09189	0.303393	0.861903	1	1805	tags=16%, list=10%, signal=18%
GO_CELLULAR_PROCESS_INVOLVED_IN_REPRODUCTION_IN_MULTICELLULAR_ORGANISM	GO_CELLULAR_PROCESS_INVOLVED_IN_REPRODUCTION_IN_MULTICELLULAR_ORGANISM		198	0.230707	1.09157	0.258197	0.861623	1	3670	tags=23%, list=21%, signal=29%
GO_PHOSPHATIDYLINOSITOL_KINASE_ACTIVITY	GO_PHOSPHATIDYLINOSITOL_KINASE_ACTIVITY		47	0.323759	1.09114	0.342052	0.861702	1	3888	tags=28%, list=22%, signal=35%
GO_RNA_METHYLATION	GO_RNA_METHYLATION		45	0.355615	1.08992	0.378168	0.863964	1	3379	tags=40%, list=19%, signal=49%
GO_RIBOSOME_ASSEMBLY	GO_RIBOSOME_ASSEMBLY		49	0.413188	1.08919	0.409002	0.864843	1	4151	tags=41%, list=24%, signal=53%
GO_PROTEIN_KINASE_A_CATALYTIC_SUBUNIT_BINDING	GO_PROTEIN_KINASE_A_CATALYTIC_SUBUNIT_BINDING		15	0.360089	1.08874	0.329218	0.865005	1	1602	tags=27%, list=9%, signal=29%
GO_SECRETORY_GRANULE_ORGANIZATION	GO_SECRETORY_GRANULE_ORGANIZATION		22	0.342971	1.08848	0.349301	0.864612	1	1329	tags=23%, list=8%, signal=25%
GO_IONOTROPIC_GLUTAMATE_RECEPTOR_BINDING	GO_IONOTROPIC_GLUTAMATE_RECEPTOR_BINDING		22	0.334047	1.08777	0.351607	0.865446	1	1602	tags=18%, list=9%, signal=20%
GO_CARDIAC_CELL_DEVELOPMENT	GO_CARDIAC_CELL_DEVELOPMENT		45	0.316211	1.08765	0.333333	0.864659	1	1762	tags=18%, list=10%, signal=20%
GO_MALE_SEX_DIFFERENTIATION	GO_MALE_SEX_DIFFERENTIATION		137	0.242495	1.08748	0.309717	0.864001	1	3660	tags=23%, list=21%, signal=29%
GO_PHOSPHATIDYLCHOLINE_BINDING	GO_PHOSPHATIDYLCHOLINE_BINDING		18	0.36213	1.08744	0.353398	0.862933	1	5322	tags=50%, list=30%, signal=71%
GO_BAF_TYPE_COMPLEX	GO_BAF_TYPE_COMPLEX		23	0.348046	1.0861	0.345455	0.865561	1	2552	tags=26%, list=14%, signal=30%
GO_PROTEIN_LOCALIZATION_TO_CILIUM	GO_PROTEIN_LOCALIZATION_TO_CILIUM		25	0.333961	1.08364	0.363095	0.871556	1	4197	tags=48%, list=24%, signal=63%
GO_POSITIVE_REGULATION_OF_DNA_METABOLIC_PROCESS	GO_POSITIVE_REGULATION_OF_DNA_METABOLIC_PROCESS		172	0.239874	1.08348	0.328185	0.870883	1	2973	tags=22%, list=17%, signal=26%
GO_NEGATIVE_REGULATION_OF_CELL_CYCLE_PROCESS	GO_NEGATIVE_REGULATION_OF_CELL_CYCLE_PROCESS		198	0.254949	1.08343	0.345114	0.86988	1	3607	tags=30%, list=20%, signal=37%
GO_VENTRICULAR_CARDIAC_MUSCLE_CELL_DIFFERENTIATION	GO_VENTRICULAR_CARDIAC_MUSCLE_CELL_DIFFERENTIATION		17	0.358601	1.08341	0.352941	0.868775	1	3550	tags=29%, list=20%, signal=37%
GO_CELLULAR_RESPONSE_TO_ESTROGEN_STIMULUS	GO_CELLULAR_RESPONSE_TO_ESTROGEN_STIMULUS		37	0.300388	1.08323	0.318637	0.868116	1	3368	tags=27%, list=19%, signal=33%
GO_PROTEIN_PHOSPHATASE_BINDING	GO_PROTEIN_PHOSPHATASE_BINDING		117	0.240745	1.08317	0.341847	0.867155	1	2802	tags=23%, list=16%, signal=27%
GO_RNA_PHOSPHODIESTER_BOND_HYDROLYSIS	GO_RNA_PHOSPHODIESTER_BOND_HYDROLYSIS		107	0.30388	1.08288	0.381605	0.866825	1	2846	tags=25%, list=16%, signal=30%
GO_NEGATIVE_REGULATION_OF_PROTEIN_COMPLEX_ASSEMBLY	GO_NEGATIVE_REGULATION_OF_PROTEIN_COMPLEX_ASSEMBLY		100	0.245369	1.08147	0.315041	0.869611	1	2750	tags=20%, list=16%, signal=24%
GO_BRAIN_MORPHOGENESIS	GO_BRAIN_MORPHOGENESIS		32	0.320473	1.08099	0.34714	0.869761	1	4737	tags=44%, list=27%, signal=60%
GO_TRANSCRIPTIONALLY_ACTIVE_CHROMATIN	GO_TRANSCRIPTIONALLY_ACTIVE_CHROMATIN		16	0.352817	1.07983	0.347909	0.871846	1	3761	tags=44%, list=21%, signal=56%
GO_N_ACETYLTRANSFERASE_ACTIVITY	GO_N_ACETYLTRANSFERASE_ACTIVITY		76	0.269203	1.07938	0.351923	0.871929	1	3599	tags=34%, list=20%, signal=43%
GO_REGULATION_OF_TRANSFORMING_GROWTH_FACTOR_BETA_PRODUCTION	GO_REGULATION_OF_TRANSFORMING_GROWTH_FACTOR_BETA_PRODUCTION		25	0.340753	1.07892	0.351779	0.872124	1	1432	tags=20%, list=8%, signal=22%
GO_LATE_ENDOSOME	GO_LATE_ENDOSOME		196	0.24426	1.07857	0.323591	0.871925	1	3621	tags=29%, list=21%, signal=36%
GO_NEGATIVE_REGULATION_OF_CYTOPLASMIC_TRANSPORT	GO_NEGATIVE_REGULATION_OF_CYTOPLASMIC_TRANSPORT		113	0.245541	1.07793	0.338877	0.872566	1	1669	tags=16%, list=9%, signal=17%
GO_DNA_DAMAGE_RESPONSE_DETECTION_OF_DNA_DAMAGE	GO_DNA_DAMAGE_RESPONSE_DETECTION_OF_DNA_DAMAGE		36	0.371566	1.07717	0.40159	0.873527	1	4130	tags=44%, list=23%, signal=58%
GO_ORGANIC_ACID_BIOSYNTHETIC_PROCESS	GO_ORGANIC_ACID_BIOSYNTHETIC_PROCESS		244	0.236391	1.07649	0.302554	0.874394	1	2571	tags=17%, list=15%, signal=19%
GO_SIGNAL_TRANSDUCTION_IN_RESPONSE_TO_DNA_DAMAGE	GO_SIGNAL_TRANSDUCTION_IN_RESPONSE_TO_DNA_DAMAGE		91	0.276868	1.07629	0.347561	0.873826	1	3607	tags=30%, list=20%, signal=37%
GO_ANAPHASE_PROMOTING_COMPLEX_DEPENDENT_CATABOLIC_PROCESS	GO_ANAPHASE_PROMOTING_COMPLEX_DEPENDENT_CATABOLIC_PROCESS		75	0.401032	1.07551	0.417822	0.874823	1	1988	tags=29%, list=11%, signal=33%
GO_SINGLE_ORGANISM_MEMBRANE_FUSION	GO_SINGLE_ORGANISM_MEMBRANE_FUSION		115	0.244333	1.07548	0.331301	0.873787	1	3929	tags=26%, list=22%, signal=33%
GO_KINASE_ACTIVATOR_ACTIVITY	GO_KINASE_ACTIVATOR_ACTIVITY		61	0.262039	1.07501	0.343313	0.873974	1	2242	tags=21%, list=13%, signal=24%
GO_REGULATION_OF_RNA_SPLICING	GO_REGULATION_OF_RNA_SPLICING		90	0.282697	1.07454	0.331325	0.874137	1	3529	tags=32%, list=20%, signal=40%
GO_ORGANOPHOSPHATE_ESTER_TRANSMEMBRANE_TRANSPORTER_ACTIVITY	GO_ORGANOPHOSPHATE_ESTER_TRANSMEMBRANE_TRANSPORTER_ACTIVITY		23	0.352506	1.07373	0.381679	0.875232	1	2620	tags=30%, list=15%, signal=36%
GO_ELECTRON_CARRIER_ACTIVITY	GO_ELECTRON_CARRIER_ACTIVITY		106	0.32241	1.07323	0.414538	0.875485	1	3246	tags=28%, list=18%, signal=34%
GO_MITOTIC_RECOMBINATION	GO_MITOTIC_RECOMBINATION		41	0.402717	1.07312	0.414634	0.874636	1	4130	tags=54%, list=23%, signal=70%
GO_POSITIVE_REGULATION_OF_G1_S_TRANSITION_OF_MITOTIC_CELL_CYCLE	GO_POSITIVE_REGULATION_OF_G1_S_TRANSITION_OF_MITOTIC_CELL_CYCLE		24	0.312557	1.07242	0.333333	0.87549	1	1497	tags=21%, list=8%, signal=23%
GO_AMMONIUM_TRANSPORT	GO_AMMONIUM_TRANSPORT		55	0.279252	1.07191	0.376033	0.875809	1	1470	tags=13%, list=8%, signal=14%
GO_SECRETORY_GRANULE_MEMBRANE	GO_SECRETORY_GRANULE_MEMBRANE		73	0.283077	1.07118	0.338266	0.876724	1	4347	tags=26%, list=25%, signal=34%
GO_ALPHA_TUBULIN_BINDING	GO_ALPHA_TUBULIN_BINDING		23	0.326408	1.07078	0.337662	0.876698	1	4065	tags=35%, list=23%, signal=45%
GO_HISTONE_KINASE_ACTIVITY	GO_HISTONE_KINASE_ACTIVITY		18	0.386939	1.07073	0.395753	0.875732	1	4097	tags=44%, list=23%, signal=58%
GO_REGULATION_OF_CARDIAC_MUSCLE_CELL_CONTRACTION	GO_REGULATION_OF_CARDIAC_MUSCLE_CELL_CONTRACTION		27	0.351953	1.07071	0.383234	0.874647	1	2227	tags=22%, list=13%, signal=25%
GO_CELLULAR_RESPONSE_TO_IONIZING_RADIATION	GO_CELLULAR_RESPONSE_TO_IONIZING_RADIATION		50	0.285519	1.07044	0.356855	0.874317	1	3939	tags=36%, list=22%, signal=46%
GO_REGULATION_OF_PROTEIN_POLYMERIZATION	GO_REGULATION_OF_PROTEIN_POLYMERIZATION		159	0.240167	1.07007	0.341463	0.874182	1	1392	tags=14%, list=8%, signal=16%
GO_POSITIVE_REGULATION_OF_VIRAL_RELEASE_FROM_HOST_CELL	GO_POSITIVE_REGULATION_OF_VIRAL_RELEASE_FROM_HOST_CELL		15	0.379424	1.06899	0.37475	0.87598	1	2008	tags=33%, list=11%, signal=38%
GO_PROTEIN_ACYLATION	GO_PROTEIN_ACYLATION		141	0.24077	1.06871	0.329293	0.875634	1	2296	tags=23%, list=13%, signal=26%
GO_RIBOSOMAL_LARGE_SUBUNIT_ASSEMBLY	GO_RIBOSOMAL_LARGE_SUBUNIT_ASSEMBLY		23	0.447582	1.06858	0.425403	0.874884	1	2918	tags=35%, list=17%, signal=42%
GO_BLASTOCYST_DEVELOPMENT	GO_BLASTOCYST_DEVELOPMENT		57	0.277798	1.06837	0.357422	0.874326	1	3661	tags=35%, list=21%, signal=44%
GO_POLYSOME	GO_POLYSOME		38	0.31854	1.0674	0.380198	0.876023	1	3627	tags=34%, list=21%, signal=43%
GO_SIGNAL_TRANSDUCTION_BY_P53_CLASS_MEDIATOR	GO_SIGNAL_TRANSDUCTION_BY_P53_CLASS_MEDIATOR		119	0.252443	1.06724	0.360721	0.875366	1	4166	tags=32%, list=24%, signal=42%
GO_TRNA_METHYLTRANSFERASE_ACTIVITY	GO_TRNA_METHYLTRANSFERASE_ACTIVITY		18	0.417699	1.0656	0.41841	0.878883	1	2807	tags=44%, list=16%, signal=53%
GO_COATED_VESICLE	GO_COATED_VESICLE		228	0.246471	1.06501	0.331313	0.879432	1	3315	tags=23%, list=19%, signal=28%
GO_GOLGI_CISTERNA	GO_GOLGI_CISTERNA		88	0.261174	1.06348	0.349901	0.882677	1	2559	tags=20%, list=14%, signal=24%
GO_LOCALIZATION_WITHIN_MEMBRANE	GO_LOCALIZATION_WITHIN_MEMBRANE		120	0.251755	1.06337	0.355865	0.881885	1	1834	tags=18%, list=10%, signal=19%
GO_RESPONSE_TO_HYDROGEN_PEROXIDE	GO_RESPONSE_TO_HYDROGEN_PEROXIDE		107	0.254934	1.06326	0.346693	0.881079	1	2568	tags=21%, list=15%, signal=24%
GO_SOMATIC_DIVERSIFICATION_OF_IMMUNOGLOBULINS	GO_SOMATIC_DIVERSIFICATION_OF_IMMUNOGLOBULINS		26	0.347404	1.06272	0.376494	0.881508	1	5655	tags=54%, list=32%, signal=79%
GO_INTERACTION_WITH_HOST	GO_INTERACTION_WITH_HOST		124	0.260764	1.06239	0.365269	0.88137	1	2992	tags=19%, list=17%, signal=23%
GO_GLUTAMATE_RECEPTOR_BINDING	GO_GLUTAMATE_RECEPTOR_BINDING		36	0.292222	1.06154	0.347573	0.88263	1	1838	tags=17%, list=10%, signal=19%
GO_REGULATION_OF_CELL_CYCLE_G1_S_PHASE_TRANSITION	GO_REGULATION_OF_CELL_CYCLE_G1_S_PHASE_TRANSITION		140	0.237619	1.06088	0.344196	0.883367	1	2580	tags=19%, list=15%, signal=22%
GO_STEROID_BIOSYNTHETIC_PROCESS	GO_STEROID_BIOSYNTHETIC_PROCESS		104	0.26926	1.06055	0.351562	0.883234	1	2119	tags=16%, list=12%, signal=18%
GO_FORMATION_OF_TRANSLATION_PREINITIATION_COMPLEX	GO_FORMATION_OF_TRANSLATION_PREINITIATION_COMPLEX		20	0.43543	1.06034	0.422037	0.882674	1	4967	tags=55%, list=28%, signal=76%
GO_RESPONSE_TO_IONIZING_RADIATION	GO_RESPONSE_TO_IONIZING_RADIATION		137	0.253802	1.05955	0.345703	0.883869	1	3939	tags=30%, list=22%, signal=38%
GO_RNA_METHYLTRANSFERASE_ACTIVITY	GO_RNA_METHYLTRANSFERASE_ACTIVITY		38	0.355156	1.05934	0.40239	0.883372	1	2807	tags=37%, list=16%, signal=44%
GO_MALE_GAMETE_GENERATION	GO_MALE_GAMETE_GENERATION		363	0.214983	1.05907	0.311377	0.882994	1	3599	tags=23%, list=20%, signal=29%
GO_PEPTIDE_N_ACETYLTRANSFERASE_ACTIVITY	GO_PEPTIDE_N_ACETYLTRANSFERASE_ACTIVITY		58	0.288534	1.05879	0.374745	0.882678	1	3599	tags=36%, list=20%, signal=45%
GO_REGULATION_OF_MRNA_CATABOLIC_PROCESS	GO_REGULATION_OF_MRNA_CATABOLIC_PROCESS		24	0.335926	1.05833	0.394477	0.882825	1	2077	tags=25%, list=12%, signal=28%
GO_CELLULAR_PROTEIN_COMPLEX_DISASSEMBLY	GO_CELLULAR_PROTEIN_COMPLEX_DISASSEMBLY		119	0.373561	1.05662	0.447106	0.886369	1	2537	tags=29%, list=14%, signal=33%
GO_TRANSLATIONAL_ELONGATION	GO_TRANSLATIONAL_ELONGATION		108	0.40326	1.05652	0.460194	0.885569	1	2841	tags=31%, list=16%, signal=36%
GO_RESPONSE_TO_COLD	GO_RESPONSE_TO_COLD		40	0.281779	1.05565	0.380952	0.886929	1	3181	tags=20%, list=18%, signal=24%
GO_RNA_HELICASE_ACTIVITY	GO_RNA_HELICASE_ACTIVITY		66	0.317629	1.05523	0.393701	0.886976	1	3262	tags=36%, list=18%, signal=44%
GO_PROTEIN_DESTABILIZATION	GO_PROTEIN_DESTABILIZATION		32	0.294119	1.05464	0.370445	0.887509	1	3111	tags=28%, list=18%, signal=34%
GO_MICROTUBULE	GO_MICROTUBULE		381	0.221509	1.0545	0.364173	0.886832	1	3068	tags=22%, list=17%, signal=26%
GO_TRANSPORT_VESICLE	GO_TRANSPORT_VESICLE		321	0.237466	1.05349	0.349901	0.888563	1	3879	tags=25%, list=22%, signal=31%
GO_PROTEIN_ALKYLATION	GO_PROTEIN_ALKYLATION		93	0.262363	1.05341	0.380038	0.887697	1	3780	tags=33%, list=21%, signal=42%
GO_PROTEIN_ACETYLATION	GO_PROTEIN_ACETYLATION		111	0.249311	1.0529	0.357708	0.887981	1	3282	tags=30%, list=19%, signal=36%
GO_MACROMOLECULE_METHYLATION	GO_MACROMOLECULE_METHYLATION		164	0.256898	1.05247	0.359684	0.888043	1	3780	tags=34%, list=21%, signal=42%
GO_PROTEIN_DISULFIDE_OXIDOREDUCTASE_ACTIVITY	GO_PROTEIN_DISULFIDE_OXIDOREDUCTASE_ACTIVITY		20	0.364273	1.05216	0.406	0.887802	1	2095	tags=30%, list=12%, signal=34%
GO_CYTOSOLIC_TRANSPORT	GO_CYTOSOLIC_TRANSPORT		198	0.232544	1.05179	0.349206	0.88773	1	1950	tags=16%, list=11%, signal=18%
GO_VENTRICULAR_SYSTEM_DEVELOPMENT	GO_VENTRICULAR_SYSTEM_DEVELOPMENT		26	0.302226	1.05138	0.37827	0.887765	1	2996	tags=31%, list=17%, signal=37%
GO_TRNA_METABOLIC_PROCESS	GO_TRNA_METABOLIC_PROCESS		166	0.341091	1.05137	0.420319	0.886729	1	2807	tags=34%, list=16%, signal=40%
GO_CYCLIN_DEPENDENT_PROTEIN_KINASE_ACTIVITY	GO_CYCLIN_DEPENDENT_PROTEIN_KINASE_ACTIVITY		34	0.303383	1.05125	0.372277	0.885981	1	4323	tags=41%, list=24%, signal=54%
GO_MATURATION_OF_5_8S_RRNA	GO_MATURATION_OF_5_8S_RRNA		28	0.410634	1.05122	0.440239	0.884988	1	2089	tags=36%, list=12%, signal=40%
GO_GLUTAMINE_FAMILY_AMINO_ACID_METABOLIC_PROCESS	GO_GLUTAMINE_FAMILY_AMINO_ACID_METABOLIC_PROCESS		62	0.274139	1.05117	0.365049	0.884035	1	4311	tags=29%, list=24%, signal=38%
GO_INTRACELLULAR_STEROID_HORMONE_RECEPTOR_SIGNALING_PATHWAY	GO_INTRACELLULAR_STEROID_HORMONE_RECEPTOR_SIGNALING_PATHWAY		65	0.259012	1.05076	0.37475	0.884065	1	3646	tags=28%, list=21%, signal=35%
GO_REGULATION_OF_NUCLEOSIDE_METABOLIC_PROCESS	GO_REGULATION_OF_NUCLEOSIDE_METABOLIC_PROCESS		44	0.272692	1.05024	0.39	0.884459	1	3351	tags=23%, list=19%, signal=28%
GO_NCRNA_METABOLIC_PROCESS	GO_NCRNA_METABOLIC_PROCESS		496	0.313895	1.04998	0.409804	0.884119	1	4233	tags=39%, list=24%, signal=50%
GO_MYOSIN_BINDING	GO_MYOSIN_BINDING		58	0.274361	1.04936	0.37827	0.884818	1	1970	tags=17%, list=11%, signal=19%
GO_SYNTAXIN_BINDING	GO_SYNTAXIN_BINDING		87	0.270228	1.0491	0.410156	0.884475	1	1604	tags=16%, list=9%, signal=18%
GO_MEMBRANE_DISASSEMBLY	GO_MEMBRANE_DISASSEMBLY		44	0.340248	1.04837	0.418367	0.88535	1	3770	tags=43%, list=21%, signal=55%
GO_TRANS_GOLGI_NETWORK_TRANSPORT_VESICLE	GO_TRANS_GOLGI_NETWORK_TRANSPORT_VESICLE		27	0.307151	1.04791	0.370445	0.885509	1	3142	tags=30%, list=18%, signal=36%
GO_ESTABLISHMENT_OR_MAINTENANCE_OF_EPITHELIAL_CELL_APICAL_BASAL_POLARITY	GO_ESTABLISHMENT_OR_MAINTENANCE_OF_EPITHELIAL_CELL_APICAL_BASAL_POLARITY		27	0.305493	1.04681	0.349398	0.887531	1	606	tags=15%, list=3%, signal=15%
GO_OXIDOREDUCTASE_ACTIVITY_ACTING_ON_NAD_P_H	GO_OXIDOREDUCTASE_ACTIVITY_ACTING_ON_NAD_P_H		89	0.342545	1.04606	0.451866	0.888584	1	3637	tags=33%, list=21%, signal=41%
GO_PEPTIDYL_PROLINE_MODIFICATION	GO_PEPTIDYL_PROLINE_MODIFICATION		45	0.29871	1.04566	0.392233	0.888623	1	3312	tags=29%, list=19%, signal=35%
GO_NEGATIVE_REGULATION_OF_PROTEIN_MODIFICATION_BY_SMALL_PROTEIN_CONJUGATION_OR_REMOVAL	GO_NEGATIVE_REGULATION_OF_PROTEIN_MODIFICATION_BY_SMALL_PROTEIN_CONJUGATION_OR_REMOVAL		133	0.289542	1.04537	0.400383	0.888361	1	2493	tags=23%, list=14%, signal=26%
GO_BRANCH_ELONGATION_OF_AN_EPITHELIUM	GO_BRANCH_ELONGATION_OF_AN_EPITHELIUM		17	0.366723	1.04335	0.408511	0.892732	1	6723	tags=59%, list=38%, signal=95%
GO_SOMATIC_DIVERSIFICATION_OF_IMMUNE_RECEPTORS	GO_SOMATIC_DIVERSIFICATION_OF_IMMUNE_RECEPTORS		37	0.324198	1.04274	0.406	0.89333	1	4774	tags=38%, list=27%, signal=52%
GO_ENTRAINMENT_OF_CIRCADIAN_CLOCK_BY_PHOTOPERIOD	GO_ENTRAINMENT_OF_CIRCADIAN_CLOCK_BY_PHOTOPERIOD		18	0.33285	1.04237	0.401186	0.893233	1	311	tags=17%, list=2%, signal=17%
GO_TRANSITION_METAL_ION_HOMEOSTASIS	GO_TRANSITION_METAL_ION_HOMEOSTASIS		97	0.255935	1.04119	0.381048	0.895423	1	3911	tags=27%, list=22%, signal=34%
GO_POSITIVE_REGULATION_OF_RNA_SPLICING	GO_POSITIVE_REGULATION_OF_RNA_SPLICING		22	0.334417	1.04097	0.394191	0.894949	1	2463	tags=27%, list=14%, signal=32%
GO_RESPONSE_TO_DSRNA	GO_RESPONSE_TO_DSRNA		53	0.282016	1.04064	0.393574	0.894849	1	2526	tags=23%, list=14%, signal=26%
GO_POSITIVE_REGULATION_OF_CELL_CYCLE_G2_M_PHASE_TRANSITION	GO_POSITIVE_REGULATION_OF_CELL_CYCLE_G2_M_PHASE_TRANSITION		18	0.333674	1.04054	0.394477	0.894027	1	3209	tags=28%, list=18%, signal=34%
GO_DICARBOXYLIC_ACID_METABOLIC_PROCESS	GO_DICARBOXYLIC_ACID_METABOLIC_PROCESS		97	0.276592	1.04042	0.396584	0.893286	1	2682	tags=22%, list=15%, signal=25%
GO_NADP_METABOLIC_PROCESS	GO_NADP_METABOLIC_PROCESS		27	0.334189	1.03981	0.411881	0.893972	1	2429	tags=30%, list=14%, signal=34%
GO_FOLIC_ACID_CONTAINING_COMPOUND_METABOLIC_PROCESS	GO_FOLIC_ACID_CONTAINING_COMPOUND_METABOLIC_PROCESS		27	0.349507	1.03947	0.421154	0.893825	1	2645	tags=26%, list=15%, signal=30%
GO_REGULATION_OF_SKELETAL_MUSCLE_CELL_DIFFERENTIATION	GO_REGULATION_OF_SKELETAL_MUSCLE_CELL_DIFFERENTIATION		15	0.386981	1.03843	0.440711	0.895776	1	3388	tags=33%, list=19%, signal=41%
GO_PHOSPHATIDYLINOSITOL_PHOSPHATE_PHOSPHATASE_ACTIVITY	GO_PHOSPHATIDYLINOSITOL_PHOSPHATE_PHOSPHATASE_ACTIVITY		29	0.319639	1.03797	0.406953	0.895982	1	4725	tags=45%, list=27%, signal=61%
GO_ESTABLISHMENT_OF_PROTEIN_LOCALIZATION_TO_ENDOPLASMIC_RETICULUM	GO_ESTABLISHMENT_OF_PROTEIN_LOCALIZATION_TO_ENDOPLASMIC_RETICULUM		103	0.421964	1.03747	0.46184	0.8963	1	5970	tags=57%, list=34%, signal=86%
GO_POSITIVE_REGULATION_OF_CHROMOSOME_ORGANIZATION	GO_POSITIVE_REGULATION_OF_CHROMOSOME_ORGANIZATION		139	0.239978	1.0371	0.391732	0.89623	1	4120	tags=33%, list=23%, signal=43%
GO_DNA_RECOMBINATION	GO_DNA_RECOMBINATION		186	0.302243	1.03645	0.434077	0.896981	1	3973	tags=38%, list=22%, signal=48%
GO_PHOSPHOLIPID_METABOLIC_PROCESS	GO_PHOSPHOLIPID_METABOLIC_PROCESS		336	0.208441	1.03581	0.362573	0.897675	1	2671	tags=19%, list=15%, signal=22%
GO_HELICASE_ACTIVITY	GO_HELICASE_ACTIVITY		147	0.304228	1.03543	0.429703	0.897652	1	3372	tags=35%, list=19%, signal=43%
GO_PEROXISOMAL_TRANSPORT	GO_PEROXISOMAL_TRANSPORT		18	0.350546	1.03507	0.398833	0.897575	1	3679	tags=50%, list=21%, signal=63%
GO_VESICLE_MEDIATED_TRANSPORT_BETWEEN_ENDOSOMAL_COMPARTMENTS	GO_VESICLE_MEDIATED_TRANSPORT_BETWEEN_ENDOSOMAL_COMPARTMENTS		19	0.32076	1.03487	0.408998	0.897089	1	3153	tags=32%, list=18%, signal=38%
GO_REGULATION_OF_CELLULAR_RESPIRATION	GO_REGULATION_OF_CELLULAR_RESPIRATION		22	0.309108	1.03486	0.411647	0.896072	1	3946	tags=36%, list=22%, signal=47%
GO_INSULIN_RECEPTOR_SIGNALING_PATHWAY	GO_INSULIN_RECEPTOR_SIGNALING_PATHWAY		76	0.24804	1.03454	0.385744	0.895807	1	3378	tags=26%, list=19%, signal=32%
GO_SPERM_PRINCIPAL_PIECE	GO_SPERM_PRINCIPAL_PIECE		15	0.352002	1.0345	0.408829	0.89488	1	4478	tags=33%, list=25%, signal=45%
GO_PROTEIN_TYROSINE_KINASE_ACTIVATOR_ACTIVITY	GO_PROTEIN_TYROSINE_KINASE_ACTIVATOR_ACTIVITY		15	0.357216	1.03377	0.408714	0.895909	1	727	tags=13%, list=4%, signal=14%
GO_LIPID_MODIFICATION	GO_LIPID_MODIFICATION		193	0.222066	1.03314	0.388889	0.896522	1	3407	tags=23%, list=19%, signal=29%
GO_PROTEIN_TARGETING_TO_MEMBRANE	GO_PROTEIN_TARGETING_TO_MEMBRANE		152	0.33347	1.03308	0.427451	0.895668	1	4406	tags=38%, list=25%, signal=50%
GO_NEGATIVE_REGULATION_OF_ERBB_SIGNALING_PATHWAY	GO_NEGATIVE_REGULATION_OF_ERBB_SIGNALING_PATHWAY		44	0.287439	1.0323	0.433333	0.896669	1	1557	tags=20%, list=9%, signal=22%
GO_PROTEIN_BINDING_INVOLVED_IN_CELL_ADHESION	GO_PROTEIN_BINDING_INVOLVED_IN_CELL_ADHESION		17	0.375073	1.03212	0.429735	0.896119	1	4252	tags=47%, list=24%, signal=62%
GO_TRANSFERASE_ACTIVITY_TRANSFERRING_ACYL_GROUPS	GO_TRANSFERASE_ACTIVITY_TRANSFERRING_ACYL_GROUPS		224	0.221646	1.03207	0.392045	0.895186	1	3599	tags=26%, list=20%, signal=33%
GO_ALPHA_AMINO_ACID_BIOSYNTHETIC_PROCESS	GO_ALPHA_AMINO_ACID_BIOSYNTHETIC_PROCESS		72	0.292599	1.03019	0.408818	0.89932	1	4418	tags=32%, list=25%, signal=42%
GO_POLYOL_BIOSYNTHETIC_PROCESS	GO_POLYOL_BIOSYNTHETIC_PROCESS		26	0.313704	1.0299	0.411531	0.899136	1	2355	tags=23%, list=13%, signal=27%
GO_POSITIVE_REGULATION_OF_MRNA_PROCESSING	GO_POSITIVE_REGULATION_OF_MRNA_PROCESSING		30	0.312753	1.02872	0.395582	0.901247	1	2451	tags=27%, list=14%, signal=31%
GO_ACROSOMAL_VESICLE	GO_ACROSOMAL_VESICLE		73	0.247121	1.0286	0.426326	0.900526	1	3059	tags=19%, list=17%, signal=23%
GO_NUCLEAR_EXPORT	GO_NUCLEAR_EXPORT		137	0.291376	1.02845	0.408537	0.899867	1	3211	tags=31%, list=18%, signal=38%
GO_PROLINE_RICH_REGION_BINDING	GO_PROLINE_RICH_REGION_BINDING		18	0.327814	1.02801	0.393939	0.900031	1	3174	tags=39%, list=18%, signal=47%
GO_POSITIVE_REGULATION_OF_POTASSIUM_ION_TRANSPORT	GO_POSITIVE_REGULATION_OF_POTASSIUM_ION_TRANSPORT		37	0.304253	1.02747	0.396	0.900522	1	4287	tags=30%, list=24%, signal=39%
GO_SERINE_FAMILY_AMINO_ACID_METABOLIC_PROCESS	GO_SERINE_FAMILY_AMINO_ACID_METABOLIC_PROCESS		39	0.308524	1.02695	0.426877	0.900951	1	4418	tags=33%, list=25%, signal=44%
GO_ERBB_SIGNALING_PATHWAY	GO_ERBB_SIGNALING_PATHWAY		77	0.256656	1.02695	0.382353	0.899923	1	2463	tags=22%, list=14%, signal=26%
GO_TRANSCRIPTION_FROM_RNA_POLYMERASE_I_PROMOTER	GO_TRANSCRIPTION_FROM_RNA_POLYMERASE_I_PROMOTER		34	0.353529	1.02662	0.439364	0.899747	1	3571	tags=44%, list=20%, signal=55%
GO_SPLICEOSOMAL_COMPLEX	GO_SPLICEOSOMAL_COMPLEX		162	0.307318	1.02655	0.415354	0.898931	1	3353	tags=34%, list=19%, signal=42%
GO_PROTEIN_MANNOSYLATION	GO_PROTEIN_MANNOSYLATION		17	0.352171	1.0265	0.410959	0.898002	1	1648	tags=35%, list=9%, signal=39%
GO_ESTABLISHMENT_OF_PROTEIN_LOCALIZATION_TO_MEMBRANE	GO_ESTABLISHMENT_OF_PROTEIN_LOCALIZATION_TO_MEMBRANE		258	0.265847	1.0264	0.40499	0.897211	1	4406	tags=34%, list=25%, signal=44%
GO_PIGMENTATION	GO_PIGMENTATION		79	0.240688	1.02601	0.392505	0.897242	1	3799	tags=29%, list=22%, signal=37%
GO_POSITIVE_REGULATION_OF_EXTRINSIC_APOPTOTIC_SIGNALING_PATHWAY_VIA_DEATH_DOMAIN_RECEPTORS	GO_POSITIVE_REGULATION_OF_EXTRINSIC_APOPTOTIC_SIGNALING_PATHWAY_VIA_DEATH_DOMAIN_RECEPTORS		15	0.361931	1.02587	0.410417	0.896598	1	3286	tags=33%, list=19%, signal=41%
GO_DNA_BIOSYNTHETIC_PROCESS	GO_DNA_BIOSYNTHETIC_PROCESS		107	0.303153	1.02557	0.449692	0.896322	1	4181	tags=40%, list=24%, signal=52%
GO_INOSITOL_PHOSPHATE_PHOSPHATASE_ACTIVITY	GO_INOSITOL_PHOSPHATE_PHOSPHATASE_ACTIVITY		20	0.325319	1.02552	0.41358	0.895448	1	2067	tags=30%, list=12%, signal=34%
GO_RECYCLING_ENDOSOME	GO_RECYCLING_ENDOSOME		116	0.234934	1.02546	0.408537	0.894564	1	1969	tags=17%, list=11%, signal=19%
GO_PROTEIN_LOCALIZATION_TO_ENDOPLASMIC_RETICULUM	GO_PROTEIN_LOCALIZATION_TO_ENDOPLASMIC_RETICULUM		122	0.38018	1.02486	0.467836	0.895105	1	4948	tags=43%, list=28%, signal=60%
GO_NITROGEN_COMPOUND_TRANSPORT	GO_NITROGEN_COMPOUND_TRANSPORT		471	0.199162	1.02483	0.394584	0.894183	1	3083	tags=18%, list=17%, signal=22%
GO_POSITIVE_REGULATION_OF_PEPTIDYL_THREONINE_PHOSPHORYLATION	GO_POSITIVE_REGULATION_OF_PEPTIDYL_THREONINE_PHOSPHORYLATION		24	0.321936	1.02429	0.417166	0.894649	1	2374	tags=21%, list=13%, signal=24%
GO_DENDRITIC_SPINE_DEVELOPMENT	GO_DENDRITIC_SPINE_DEVELOPMENT		19	0.357683	1.02349	0.443089	0.895816	1	1772	tags=26%, list=10%, signal=29%
GO_CELLULAR_RESPONSE_TO_LITHIUM_ION	GO_CELLULAR_RESPONSE_TO_LITHIUM_ION		15	0.359114	1.02317	0.429752	0.895663	1	3646	tags=47%, list=21%, signal=59%
GO_PHOSPHATIDYLGLYCEROL_ACYL_CHAIN_REMODELING	GO_PHOSPHATIDYLGLYCEROL_ACYL_CHAIN_REMODELING		16	0.349315	1.02299	0.391837	0.895156	1	3240	tags=25%, list=18%, signal=31%
GO_MACROAUTOPHAGY	GO_MACROAUTOPHAGY		254	0.217723	1.02265	0.378819	0.89506	1	3165	tags=22%, list=18%, signal=27%
GO_WNT_SIGNALING_PATHWAY_CALCIUM_MODULATING_PATHWAY	GO_WNT_SIGNALING_PATHWAY_CALCIUM_MODULATING_PATHWAY		34	0.298384	1.02192	0.416327	0.896021	1	4560	tags=35%, list=26%, signal=47%
GO_CADHERIN_BINDING	GO_CADHERIN_BINDING		28	0.320292	1.02153	0.403292	0.896079	1	4734	tags=39%, list=27%, signal=54%
GO_PROTEIN_TYROSINE_PHOSPHATASE_ACTIVITY	GO_PROTEIN_TYROSINE_PHOSPHATASE_ACTIVITY		95	0.233845	1.02148	0.394191	0.895212	1	3475	tags=25%, list=20%, signal=31%
GO_CELLULAR_RESPONSE_TO_REACTIVE_OXYGEN_SPECIES	GO_CELLULAR_RESPONSE_TO_REACTIVE_OXYGEN_SPECIES		101	0.231827	1.02077	0.42126	0.89614	1	2554	tags=21%, list=14%, signal=24%
GO_THYROID_HORMONE_RECEPTOR_BINDING	GO_THYROID_HORMONE_RECEPTOR_BINDING		30	0.29167	1.02058	0.422932	0.895638	1	3212	tags=30%, list=18%, signal=37%
GO_PROTEIN_K48_LINKED_DEUBIQUITINATION	GO_PROTEIN_K48_LINKED_DEUBIQUITINATION		19	0.345642	1.01994	0.438525	0.896428	1	3521	tags=53%, list=20%, signal=66%
GO_REGULATION_OF_TELOMERE_MAINTENANCE_VIA_TELOMERE_LENGTHENING	GO_REGULATION_OF_TELOMERE_MAINTENANCE_VIA_TELOMERE_LENGTHENING		49	0.296847	1.01928	0.427184	0.897226	1	3646	tags=35%, list=21%, signal=44%
GO_REGULATION_OF_TELOMERASE_RNA_LOCALIZATION_TO_CAJAL_BODY	GO_REGULATION_OF_TELOMERASE_RNA_LOCALIZATION_TO_CAJAL_BODY		15	0.489158	1.01926	0.502016	0.896265	1	2641	tags=40%, list=15%, signal=47%
GO_PROTEIN_PHOSPHATASE_2A_BINDING	GO_PROTEIN_PHOSPHATASE_2A_BINDING		27	0.28747	1.01844	0.40856	0.897495	1	1987	tags=22%, list=11%, signal=25%
GO_RECOMBINATIONAL_REPAIR	GO_RECOMBINATIONAL_REPAIR		69	0.330387	1.01831	0.455285	0.896847	1	4106	tags=42%, list=23%, signal=55%
GO_LIGASE_ACTIVITY_FORMING_CARBON_NITROGEN_BONDS	GO_LIGASE_ACTIVITY_FORMING_CARBON_NITROGEN_BONDS		51	0.293655	1.01819	0.416667	0.896142	1	3136	tags=27%, list=18%, signal=33%
GO_POSITIVE_REGULATION_OF_NUCLEOTIDE_CATABOLIC_PROCESS	GO_POSITIVE_REGULATION_OF_NUCLEOTIDE_CATABOLIC_PROCESS		15	0.380209	1.01683	0.476578	0.898768	1	101	tags=7%, list=1%, signal=7%
GO_CYTOPLASMIC_TRANSLATION	GO_CYTOPLASMIC_TRANSLATION		40	0.398134	1.01665	0.474206	0.89824	1	4015	tags=45%, list=23%, signal=58%
GO_TRANSLESION_SYNTHESIS	GO_TRANSLESION_SYNTHESIS		36	0.337205	1.01635	0.447316	0.898059	1	4130	tags=44%, list=23%, signal=58%
GO_PROTEIN_LOCALIZATION_TO_CELL_PERIPHERY	GO_PROTEIN_LOCALIZATION_TO_CELL_PERIPHERY		150	0.227046	1.01513	0.438669	0.900293	1	2681	tags=19%, list=15%, signal=22%
GO_INTRAMOLECULAR_OXIDOREDUCTASE_ACTIVITY	GO_INTRAMOLECULAR_OXIDOREDUCTASE_ACTIVITY		49	0.296198	1.01488	0.42037	0.899929	1	2329	tags=22%, list=13%, signal=26%
GO_EMBRYONIC_PATTERN_SPECIFICATION	GO_EMBRYONIC_PATTERN_SPECIFICATION		56	0.257692	1.01458	0.432	0.899743	1	5665	tags=41%, list=32%, signal=60%
GO_MITOCHONDRIAL_MATRIX	GO_MITOCHONDRIAL_MATRIX		384	0.308045	1.01454	0.458498	0.898884	1	4039	tags=34%, list=23%, signal=43%
GO_NEGATIVE_REGULATION_OF_PROTEIN_SERINE_THREONINE_KINASE_ACTIVITY	GO_NEGATIVE_REGULATION_OF_PROTEIN_SERINE_THREONINE_KINASE_ACTIVITY		125	0.230576	1.01401	0.423313	0.899314	1	1672	tags=16%, list=9%, signal=18%
GO_BLASTOCYST_FORMATION	GO_BLASTOCYST_FORMATION		28	0.293962	1.01373	0.417647	0.89907	1	1262	tags=21%, list=7%, signal=23%
GO_INOSITOL_PHOSPHATE_MEDIATED_SIGNALING	GO_INOSITOL_PHOSPHATE_MEDIATED_SIGNALING		17	0.351466	1.01332	0.429142	0.89917	1	1315	tags=18%, list=7%, signal=19%
GO_INNATE_IMMUNE_RESPONSE_ACTIVATING_CELL_SURFACE_RECEPTOR_SIGNALING_PATHWAY	GO_INNATE_IMMUNE_RESPONSE_ACTIVATING_CELL_SURFACE_RECEPTOR_SIGNALING_PATHWAY		104	0.278634	1.01283	0.43	0.899507	1	1988	tags=19%, list=11%, signal=22%
GO_NEGATIVE_REGULATION_OF_PROTEIN_TYROSINE_KINASE_ACTIVITY	GO_NEGATIVE_REGULATION_OF_PROTEIN_TYROSINE_KINASE_ACTIVITY		19	0.323534	1.01238	0.445783	0.899741	1	1148	tags=21%, list=7%, signal=22%
GO_REGULATION_OF_RNA_STABILITY	GO_REGULATION_OF_RNA_STABILITY		134	0.271268	1.01204	0.458824	0.899638	1	3910	tags=31%, list=22%, signal=39%
GO_REGULATION_OF_ACTIN_FILAMENT_LENGTH	GO_REGULATION_OF_ACTIN_FILAMENT_LENGTH		143	0.238759	1.01146	0.419223	0.900219	1	2437	tags=18%, list=14%, signal=21%
GO_TRANSCRIPTION_FACTOR_COMPLEX	GO_TRANSCRIPTION_FACTOR_COMPLEX		279	0.208382	1.0114	0.416667	0.899383	1	3669	tags=24%, list=21%, signal=30%
GO_N_ACYLTRANSFERASE_ACTIVITY	GO_N_ACYLTRANSFERASE_ACTIVITY		93	0.242833	1.01123	0.437859	0.898865	1	3599	tags=29%, list=20%, signal=36%
GO_POSITIVE_REGULATION_OF_PROTEIN_COMPLEX_ASSEMBLY	GO_POSITIVE_REGULATION_OF_PROTEIN_COMPLEX_ASSEMBLY		180	0.216906	1.01118	0.446939	0.898029	1	3646	tags=25%, list=21%, signal=31%
GO_REGULATION_OF_DOUBLE_STRAND_BREAK_REPAIR_VIA_HOMOLOGOUS_RECOMBINATION	GO_REGULATION_OF_DOUBLE_STRAND_BREAK_REPAIR_VIA_HOMOLOGOUS_RECOMBINATION		17	0.351675	1.01115	0.440644	0.897112	1	3561	tags=41%, list=20%, signal=52%
GO_DNA_DEMETHYLATION	GO_DNA_DEMETHYLATION		15	0.360913	1.0106	0.438878	0.897515	1	4956	tags=33%, list=28%, signal=46%
GO_WNT_SIGNALING_PATHWAY	GO_WNT_SIGNALING_PATHWAY		332	0.207338	1.00958	0.413174	0.899251	1	1988	tags=14%, list=11%, signal=15%
GO_REGULATION_OF_GENERATION_OF_PRECURSOR_METABOLITES_AND_ENERGY	GO_REGULATION_OF_GENERATION_OF_PRECURSOR_METABOLITES_AND_ENERGY		80	0.231082	1.00915	0.418947	0.899451	1	3351	tags=23%, list=19%, signal=28%
GO_POSITIVE_REGULATION_OF_GLUCOSE_TRANSPORT	GO_POSITIVE_REGULATION_OF_GLUCOSE_TRANSPORT		38	0.286436	1.00875	0.443299	0.899484	1	3044	tags=26%, list=17%, signal=32%
GO_INTERLEUKIN_1_PRODUCTION	GO_INTERLEUKIN_1_PRODUCTION		15	0.403031	1.0085	0.443564	0.899143	1	5372	tags=40%, list=30%, signal=57%
GO_NEGATIVE_REGULATION_OF_VIRAL_TRANSCRIPTION	GO_NEGATIVE_REGULATION_OF_VIRAL_TRANSCRIPTION		24	0.310865	1.00845	0.447154	0.898305	1	787	tags=13%, list=4%, signal=13%
GO_REPLICATION_FORK	GO_REPLICATION_FORK		62	0.348346	1.00836	0.460606	0.897558	1	3881	tags=44%, list=22%, signal=56%
GO_PHOSPHOLIPASE_BINDING	GO_PHOSPHOLIPASE_BINDING		18	0.310007	1.00831	0.43	0.896721	1	3586	tags=28%, list=20%, signal=35%
GO_PHOSPHOLIPID_DEPHOSPHORYLATION	GO_PHOSPHOLIPID_DEPHOSPHORYLATION		24	0.318449	1.008	0.446939	0.896551	1	4901	tags=50%, list=28%, signal=69%
GO_TRANSFERASE_ACTIVITY_TRANSFERRING_ACYL_GROUPS_OTHER_THAN_AMINO_ACYL_GROUPS	GO_TRANSFERASE_ACTIVITY_TRANSFERRING_ACYL_GROUPS_OTHER_THAN_AMINO_ACYL_GROUPS		193	0.221014	1.00781	0.430799	0.896103	1	3599	tags=27%, list=20%, signal=34%
GO_LIPID_TRANSLOCATION	GO_LIPID_TRANSLOCATION		21	0.35182	1.00761	0.438492	0.895626	1	6225	tags=52%, list=35%, signal=81%
GO_CELLULAR_RESPONSE_TO_ESTRADIOL_STIMULUS	GO_CELLULAR_RESPONSE_TO_ESTRADIOL_STIMULUS		27	0.301029	1.00656	0.43125	0.897422	1	3368	tags=26%, list=19%, signal=32%
GO_PHOSPHATIDYLINOSITOL_BINDING	GO_PHOSPHATIDYLINOSITOL_BINDING		190	0.228459	1.00557	0.446028	0.899072	1	4296	tags=29%, list=24%, signal=39%
GO_RIBONUCLEOPROTEIN_COMPLEX_BIOGENESIS	GO_RIBONUCLEOPROTEIN_COMPLEX_BIOGENESIS		412	0.313155	1.00532	0.445545	0.898786	1	4189	tags=37%, list=24%, signal=48%
GO_REGULATION_OF_CYTOPLASMIC_TRANSPORT	GO_REGULATION_OF_CYTOPLASMIC_TRANSPORT		458	0.201943	1.00527	0.422311	0.897952	1	1731	tags=14%, list=10%, signal=15%
GO_ANTIGEN_PROCESSING_AND_PRESENTATION_OF_PEPTIDE_OR_POLYSACCHARIDE_ANTIGEN_VIA_MHC_CLASS_II	GO_ANTIGEN_PROCESSING_AND_PRESENTATION_OF_PEPTIDE_OR_POLYSACCHARIDE_ANTIGEN_VIA_MHC_CLASS_II		87	0.268136	1.00522	0.448141	0.897086	1	3634	tags=25%, list=21%, signal=32%
GO_METALLOEXOPEPTIDASE_ACTIVITY	GO_METALLOEXOPEPTIDASE_ACTIVITY		48	0.259868	1.00516	0.447876	0.896289	1	3828	tags=27%, list=22%, signal=34%
GO_STEROID_HORMONE_RECEPTOR_BINDING	GO_STEROID_HORMONE_RECEPTOR_BINDING		78	0.240832	1.00508	0.428008	0.89551	1	3646	tags=26%, list=21%, signal=32%
GO_REGULATION_OF_TRANSCRIPTION_INVOLVED_IN_G1_S_TRANSITION_OF_MITOTIC_CELL_CYCLE	GO_REGULATION_OF_TRANSCRIPTION_INVOLVED_IN_G1_S_TRANSITION_OF_MITOTIC_CELL_CYCLE		25	0.364325	1.00496	0.449304	0.894879	1	3230	tags=36%, list=18%, signal=44%
GO_PHOSPHATIDYLETHANOLAMINE_METABOLIC_PROCESS	GO_PHOSPHATIDYLETHANOLAMINE_METABOLIC_PROCESS		16	0.335546	1.00436	0.426263	0.895466	1	894	tags=19%, list=5%, signal=20%
GO_CYSTEINE_TYPE_ENDOPEPTIDASE_REGULATOR_ACTIVITY_INVOLVED_IN_APOPTOTIC_PROCESS	GO_CYSTEINE_TYPE_ENDOPEPTIDASE_REGULATOR_ACTIVITY_INVOLVED_IN_APOPTOTIC_PROCESS		38	0.271031	1.00431	0.465209	0.894669	1	4123	tags=32%, list=23%, signal=41%
GO_PHOSPHATIDYLINOSITOL_DEPHOSPHORYLATION	GO_PHOSPHATIDYLINOSITOL_DEPHOSPHORYLATION		23	0.3198	1.00409	0.438247	0.894243	1	4725	tags=48%, list=27%, signal=65%
GO_RETINA_LAYER_FORMATION	GO_RETINA_LAYER_FORMATION		22	0.351756	1.00405	0.456389	0.893379	1	2358	tags=18%, list=13%, signal=21%
GO_OUTER_MEMBRANE	GO_OUTER_MEMBRANE		166	0.220674	1.00398	0.41954	0.892614	1	2447	tags=18%, list=14%, signal=21%
GO_VACUOLE_FUSION	GO_VACUOLE_FUSION		22	0.307238	1.00381	0.456033	0.892119	1	4201	tags=41%, list=24%, signal=54%
GO_ENERGY_DERIVATION_BY_OXIDATION_OF_ORGANIC_COMPOUNDS	GO_ENERGY_DERIVATION_BY_OXIDATION_OF_ORGANIC_COMPOUNDS		203	0.293325	1.00364	0.467308	0.891613	1	3506	tags=30%, list=20%, signal=37%
GO_REGULATION_OF_B_CELL_APOPTOTIC_PROCESS	GO_REGULATION_OF_B_CELL_APOPTOTIC_PROCESS		18	0.336585	1.00356	0.451883	0.89088	1	1667	tags=22%, list=9%, signal=25%
GO_RIBOSOME	GO_RIBOSOME		212	0.379496	1.00298	0.493014	0.891446	1	4190	tags=39%, list=24%, signal=50%
GO_QUINONE_BINDING	GO_QUINONE_BINDING		15	0.339853	1.00275	0.440882	0.89111	1	3161	tags=33%, list=18%, signal=41%
GO_SULFUR_AMINO_ACID_BIOSYNTHETIC_PROCESS	GO_SULFUR_AMINO_ACID_BIOSYNTHETIC_PROCESS		19	0.337612	1.00274	0.452756	0.890201	1	4418	tags=42%, list=25%, signal=56%
GO_REPLISOME	GO_REPLISOME		29	0.360108	1.00247	0.471058	0.889917	1	4130	tags=48%, list=23%, signal=63%
GO_CELLULAR_RESPONSE_TO_RADIATION	GO_CELLULAR_RESPONSE_TO_RADIATION		128	0.227047	1.00236	0.430928	0.889278	1	3641	tags=28%, list=21%, signal=35%
GO_OOCYTE_MATURATION	GO_OOCYTE_MATURATION		16	0.338304	1.00122	0.451883	0.891351	1	1762	tags=19%, list=10%, signal=21%
GO_MORPHOGENESIS_OF_A_POLARIZED_EPITHELIUM	GO_MORPHOGENESIS_OF_A_POLARIZED_EPITHELIUM		27	0.309762	1.0012	0.483871	0.890451	1	2703	tags=22%, list=15%, signal=26%
GO_POSITIVE_REGULATION_OF_TRANSFORMING_GROWTH_FACTOR_BETA_PRODUCTION	GO_POSITIVE_REGULATION_OF_TRANSFORMING_GROWTH_FACTOR_BETA_PRODUCTION		16	0.365468	1.00107	0.469307	0.889866	1	957	tags=19%, list=5%, signal=20%
GO_POSITIVE_REGULATION_OF_CELL_CYCLE_ARREST	GO_POSITIVE_REGULATION_OF_CELL_CYCLE_ARREST		79	0.248668	1.0008	0.462656	0.889644	1	4097	tags=32%, list=23%, signal=41%
GO_BILE_ACID_BIOSYNTHETIC_PROCESS	GO_BILE_ACID_BIOSYNTHETIC_PROCESS		20	0.324438	1.00026	0.457143	0.890074	1	1408	tags=15%, list=8%, signal=16%
GO_ANATOMICAL_STRUCTURE_HOMEOSTASIS	GO_ANATOMICAL_STRUCTURE_HOMEOSTASIS		258	0.208217	0.999658	0.450098	0.890794	1	3881	tags=27%, list=22%, signal=34%
GO_RNA_SPLICING	GO_RNA_SPLICING		346	0.276191	0.999612	0.442688	0.889975	1	3529	tags=32%, list=20%, signal=39%
GO_CELLULAR_TRANSITION_METAL_ION_HOMEOSTASIS	GO_CELLULAR_TRANSITION_METAL_ION_HOMEOSTASIS		70	0.259191	0.999424	0.445759	0.889552	1	3507	tags=24%, list=20%, signal=30%
GO_ENDONUCLEASE_ACTIVITY	GO_ENDONUCLEASE_ACTIVITY		115	0.255904	0.999355	0.460938	0.888773	1	3205	tags=26%, list=18%, signal=32%
GO_PHOSPHATIDYLCHOLINE_BIOSYNTHETIC_PROCESS	GO_PHOSPHATIDYLCHOLINE_BIOSYNTHETIC_PROCESS		26	0.300032	0.998696	0.459302	0.889505	1	2671	tags=23%, list=15%, signal=27%
GO_ALCOHOL_CATABOLIC_PROCESS	GO_ALCOHOL_CATABOLIC_PROCESS		55	0.252294	0.997929	0.46139	0.890561	1	1675	tags=16%, list=9%, signal=18%
GO_CILIARY_TIP	GO_CILIARY_TIP		42	0.295216	0.997335	0.428571	0.891217	1	2924	tags=29%, list=17%, signal=34%
GO_ATPASE_COUPLED_ION_TRANSMEMBRANE_TRANSPORTER_ACTIVITY	GO_ATPASE_COUPLED_ION_TRANSMEMBRANE_TRANSPORTER_ACTIVITY		70	0.261386	0.997315	0.434959	0.890347	1	3077	tags=23%, list=17%, signal=28%
GO_SMALL_MOLECULE_BIOSYNTHETIC_PROCESS	GO_SMALL_MOLECULE_BIOSYNTHETIC_PROCESS		407	0.224311	0.996232	0.436759	0.89213	1	2686	tags=18%, list=15%, signal=21%
GO_POSITIVE_REGULATION_OF_NEUROLOGICAL_SYSTEM_PROCESS	GO_POSITIVE_REGULATION_OF_NEUROLOGICAL_SYSTEM_PROCESS		19	0.348673	0.996134	0.467368	0.891449	1	923	tags=11%, list=5%, signal=11%
GO_PROTEIN_LOCALIZATION_TO_MEMBRANE	GO_PROTEIN_LOCALIZATION_TO_MEMBRANE		368	0.228211	0.995853	0.414201	0.89126	1	3165	tags=21%, list=18%, signal=26%
GO_COENZYME_BIOSYNTHETIC_PROCESS	GO_COENZYME_BIOSYNTHETIC_PROCESS		112	0.291033	0.995337	0.459302	0.891665	1	2511	tags=23%, list=14%, signal=27%
GO_INNATE_IMMUNE_RESPONSE_IN_MUCOSA	GO_INNATE_IMMUNE_RESPONSE_IN_MUCOSA		18	0.397115	0.995028	0.456814	0.891507	1	4811	tags=50%, list=27%, signal=69%
GO_INTRINSIC_COMPONENT_OF_MITOCHONDRIAL_MEMBRANE	GO_INTRINSIC_COMPONENT_OF_MITOCHONDRIAL_MEMBRANE		43	0.331931	0.994901	0.489066	0.890907	1	3619	tags=37%, list=20%, signal=47%
GO_POLYSACCHARIDE_METABOLIC_PROCESS	GO_POLYSACCHARIDE_METABOLIC_PROCESS		74	0.245422	0.994586	0.451613	0.890802	1	2611	tags=20%, list=15%, signal=24%
GO_4_IRON_4_SULFUR_CLUSTER_BINDING	GO_4_IRON_4_SULFUR_CLUSTER_BINDING		40	0.313982	0.994574	0.474849	0.889908	1	2624	tags=35%, list=15%, signal=41%
GO_EARLY_ENDOSOME	GO_EARLY_ENDOSOME		277	0.210446	0.993963	0.449898	0.890551	1	2810	tags=20%, list=16%, signal=23%
GO_THIOESTER_METABOLIC_PROCESS	GO_THIOESTER_METABOLIC_PROCESS		73	0.275553	0.993422	0.467557	0.891034	1	1824	tags=19%, list=10%, signal=21%
GO_SNARE_BINDING	GO_SNARE_BINDING		120	0.232502	0.993233	0.465863	0.890642	1	2118	tags=18%, list=12%, signal=20%
GO_LIPOPROTEIN_BIOSYNTHETIC_PROCESS	GO_LIPOPROTEIN_BIOSYNTHETIC_PROCESS		83	0.247008	0.992823	0.44358	0.890772	1	2756	tags=25%, list=16%, signal=30%
GO_OXIDOREDUCTASE_ACTIVITY_ACTING_ON_NAD_P_H_QUINONE_OR_SIMILAR_COMPOUND_AS_ACCEPTOR	GO_OXIDOREDUCTASE_ACTIVITY_ACTING_ON_NAD_P_H_QUINONE_OR_SIMILAR_COMPOUND_AS_ACCEPTOR		51	0.40495	0.99204	0.502994	0.891876	1	3637	tags=37%, list=21%, signal=47%
GO_PHOSPHATIDYLINOSITOL_METABOLIC_PROCESS	GO_PHOSPHATIDYLINOSITOL_METABOLIC_PROCESS		186	0.213712	0.991386	0.448413	0.892618	1	3539	tags=23%, list=20%, signal=29%
GO_VITAMIN_D_RECEPTOR_BINDING	GO_VITAMIN_D_RECEPTOR_BINDING		17	0.326511	0.991288	0.491296	0.891928	1	1770	tags=24%, list=10%, signal=26%
GO_REGULATION_OF_NEURON_PROJECTION_REGENERATION	GO_REGULATION_OF_NEURON_PROJECTION_REGENERATION		20	0.340587	0.991009	0.456612	0.89178	1	4258	tags=40%, list=24%, signal=53%
GO_RESPONSE_TO_STARVATION	GO_RESPONSE_TO_STARVATION		145	0.221289	0.990978	0.475789	0.890946	1	2712	tags=19%, list=15%, signal=23%
GO_REGULATION_OF_FATTY_ACID_METABOLIC_PROCESS	GO_REGULATION_OF_FATTY_ACID_METABOLIC_PROCESS		82	0.239698	0.990779	0.47379	0.890562	1	1616	tags=15%, list=9%, signal=16%
GO_STEM_CELL_DIVISION	GO_STEM_CELL_DIVISION		29	0.303526	0.990307	0.470348	0.890868	1	2928	tags=21%, list=17%, signal=25%
GO_TRANSLATIONAL_INITIATION	GO_TRANSLATIONAL_INITIATION		142	0.371757	0.989644	0.498039	0.891687	1	5091	tags=44%, list=29%, signal=62%
GO_CEREBRAL_CORTEX_DEVELOPMENT	GO_CEREBRAL_CORTEX_DEVELOPMENT		102	0.243361	0.988966	0.467871	0.892481	1	4772	tags=33%, list=27%, signal=45%
GO_GLYCEROPHOSPHOLIPID_METABOLIC_PROCESS	GO_GLYCEROPHOSPHOLIPID_METABOLIC_PROCESS		283	0.200205	0.988464	0.453094	0.892875	1	3624	tags=23%, list=21%, signal=29%
GO_NUCLEOTIDYLTRANSFERASE_ACTIVITY	GO_NUCLEOTIDYLTRANSFERASE_ACTIVITY		121	0.258254	0.987965	0.463178	0.89322	1	3571	tags=31%, list=20%, signal=38%
GO_STEROID_DEHYDROGENASE_ACTIVITY	GO_STEROID_DEHYDROGENASE_ACTIVITY		27	0.312901	0.987731	0.468354	0.89289	1	932	tags=11%, list=5%, signal=12%
GO_ECTODERMAL_PLACODE_DEVELOPMENT	GO_ECTODERMAL_PLACODE_DEVELOPMENT		15	0.325952	0.987282	0.456914	0.893147	1	4359	tags=40%, list=25%, signal=53%
GO_AUTOPHAGY	GO_AUTOPHAGY		360	0.205923	0.987103	0.444219	0.892675	1	3531	tags=25%, list=20%, signal=31%
GO_ACID_THIOL_LIGASE_ACTIVITY	GO_ACID_THIOL_LIGASE_ACTIVITY		18	0.332973	0.986808	0.459459	0.892526	1	2682	tags=28%, list=15%, signal=33%
GO_NEGATIVE_REGULATION_OF_CATABOLIC_PROCESS	GO_NEGATIVE_REGULATION_OF_CATABOLIC_PROCESS		193	0.200926	0.985837	0.486373	0.894083	1	2543	tags=18%, list=14%, signal=21%
GO_TRANSFERASE_ACTIVITY_TRANSFERRING_ONE_CARBON_GROUPS	GO_TRANSFERASE_ACTIVITY_TRANSFERRING_ONE_CARBON_GROUPS		176	0.254301	0.985047	0.462168	0.895233	1	2807	tags=26%, list=16%, signal=30%
GO_ORGANELLE_MEMBRANE_FUSION	GO_ORGANELLE_MEMBRANE_FUSION		91	0.235651	0.98496	0.479253	0.894572	1	3166	tags=22%, list=18%, signal=27%
GO_RELAXATION_OF_MUSCLE	GO_RELAXATION_OF_MUSCLE		20	0.344696	0.984097	0.476954	0.895939	1	4481	tags=35%, list=25%, signal=47%
GO_QUINONE_METABOLIC_PROCESS	GO_QUINONE_METABOLIC_PROCESS		28	0.358459	0.983832	0.486922	0.895714	1	4070	tags=36%, list=23%, signal=46%
GO_PRODUCTION_OF_MOLECULAR_MEDIATOR_OF_IMMUNE_RESPONSE	GO_PRODUCTION_OF_MOLECULAR_MEDIATOR_OF_IMMUNE_RESPONSE		56	0.2728	0.983419	0.476289	0.895868	1	4914	tags=34%, list=28%, signal=47%
GO_APICAL_JUNCTION_COMPLEX	GO_APICAL_JUNCTION_COMPLEX		117	0.248805	0.982858	0.46473	0.896355	1	3707	tags=26%, list=21%, signal=33%
GO_TRANSLATION_PREINITIATION_COMPLEX	GO_TRANSLATION_PREINITIATION_COMPLEX		16	0.40333	0.982792	0.4846	0.895643	1	2775	tags=31%, list=16%, signal=37%
GO_REGULATION_OF_ATPASE_ACTIVITY	GO_REGULATION_OF_ATPASE_ACTIVITY		61	0.254453	0.982284	0.464143	0.896066	1	3780	tags=26%, list=21%, signal=33%
GO_INSULIN_RECEPTOR_BINDING	GO_INSULIN_RECEPTOR_BINDING		31	0.297915	0.982232	0.496881	0.895292	1	1244	tags=16%, list=7%, signal=17%
GO_TELOMERE_MAINTENANCE_VIA_RECOMBINATION	GO_TELOMERE_MAINTENANCE_VIA_RECOMBINATION		32	0.387361	0.982169	0.503119	0.894543	1	4130	tags=53%, list=23%, signal=69%
GO_MITOCHONDRIAL_ELECTRON_TRANSPORT_CYTOCHROME_C_TO_OXYGEN	GO_MITOCHONDRIAL_ELECTRON_TRANSPORT_CYTOCHROME_C_TO_OXYGEN		16	0.463429	0.982035	0.521385	0.893975	1	2025	tags=31%, list=11%, signal=35%
GO_RRNA_MODIFICATION	GO_RRNA_MODIFICATION		23	0.373575	0.98195	0.487854	0.893304	1	1728	tags=26%, list=10%, signal=29%
GO_DNA_REPLICATION	GO_DNA_REPLICATION		190	0.302209	0.981863	0.493952	0.892634	1	3940	tags=39%, list=22%, signal=50%
GO_REGULATION_OF_EARLY_ENDOSOME_TO_LATE_ENDOSOME_TRANSPORT	GO_REGULATION_OF_EARLY_ENDOSOME_TO_LATE_ENDOSOME_TRANSPORT		16	0.326216	0.981651	0.471774	0.892253	1	2407	tags=31%, list=14%, signal=36%
GO_PHOTORECEPTOR_CELL_MAINTENANCE	GO_PHOTORECEPTOR_CELL_MAINTENANCE		31	0.314333	0.981538	0.474609	0.89166	1	3259	tags=29%, list=18%, signal=36%
GO_REGULATION_OF_INTERFERON_ALPHA_PRODUCTION	GO_REGULATION_OF_INTERFERON_ALPHA_PRODUCTION		19	0.354441	0.980865	0.490722	0.892447	1	3181	tags=32%, list=18%, signal=38%
GO_VIRAL_LIFE_CYCLE	GO_VIRAL_LIFE_CYCLE		276	0.252875	0.980773	0.455621	0.891806	1	3197	tags=24%, list=18%, signal=29%
GO_LIPID_OXIDATION	GO_LIPID_OXIDATION		68	0.27986	0.979825	0.469008	0.89325	1	3178	tags=28%, list=18%, signal=34%
GO_MULTI_ORGANISM_ORGANELLE_ORGANIZATION	GO_MULTI_ORGANISM_ORGANELLE_ORGANIZATION		23	0.340074	0.978903	0.48	0.894679	1	2550	tags=39%, list=14%, signal=46%
GO_TELOMERE_MAINTENANCE_VIA_TELOMERASE	GO_TELOMERE_MAINTENANCE_VIA_TELOMERASE		16	0.34065	0.978713	0.451346	0.894277	1	3539	tags=38%, list=20%, signal=47%
GO_CELL_DEATH_IN_RESPONSE_TO_OXIDATIVE_STRESS	GO_CELL_DEATH_IN_RESPONSE_TO_OXIDATIVE_STRESS		18	0.327675	0.978326	0.463855	0.894391	1	3857	tags=39%, list=22%, signal=50%
GO_PROTEIN_HOMOTETRAMERIZATION	GO_PROTEIN_HOMOTETRAMERIZATION		58	0.252913	0.977767	0.47929	0.894951	1	1882	tags=17%, list=11%, signal=19%
GO_POLYOL_METABOLIC_PROCESS	GO_POLYOL_METABOLIC_PROCESS		92	0.23401	0.977269	0.490119	0.895337	1	2782	tags=22%, list=16%, signal=26%
GO_3_5_CYCLIC_AMP_PHOSPHODIESTERASE_ACTIVITY	GO_3_5_CYCLIC_AMP_PHOSPHODIESTERASE_ACTIVITY		15	0.375526	0.977251	0.486762	0.894495	1	4966	tags=47%, list=28%, signal=65%
GO_NEGATIVE_REGULATION_OF_KINASE_ACTIVITY	GO_NEGATIVE_REGULATION_OF_KINASE_ACTIVITY		241	0.209288	0.977022	0.485656	0.894147	1	1738	tags=15%, list=10%, signal=16%
GO_CELLULAR_RESPONSE_TO_INSULIN_STIMULUS	GO_CELLULAR_RESPONSE_TO_INSULIN_STIMULUS		139	0.212977	0.976996	0.465863	0.893343	1	4097	tags=27%, list=23%, signal=34%
GO_COLUMNAR_CUBOIDAL_EPITHELIAL_CELL_DEVELOPMENT	GO_COLUMNAR_CUBOIDAL_EPITHELIAL_CELL_DEVELOPMENT		46	0.268085	0.976864	0.504115	0.892794	1	3878	tags=26%, list=22%, signal=33%
GO_AUTOPHAGOSOME_ORGANIZATION	GO_AUTOPHAGOSOME_ORGANIZATION		39	0.271725	0.976257	0.514344	0.893488	1	3048	tags=33%, list=17%, signal=40%
GO_ESTABLISHMENT_OR_MAINTENANCE_OF_BIPOLAR_CELL_POLARITY	GO_ESTABLISHMENT_OR_MAINTENANCE_OF_BIPOLAR_CELL_POLARITY		34	0.268311	0.97596	0.517103	0.893389	1	1772	tags=18%, list=10%, signal=20%
GO_PIGMENT_GRANULE	GO_PIGMENT_GRANULE		100	0.244827	0.97527	0.496047	0.894265	1	3581	tags=24%, list=20%, signal=30%
GO_POSITIVE_REGULATION_OF_CELLULAR_RESPONSE_TO_INSULIN_STIMULUS	GO_POSITIVE_REGULATION_OF_CELLULAR_RESPONSE_TO_INSULIN_STIMULUS		20	0.304925	0.97504	0.471193	0.893962	1	3044	tags=35%, list=17%, signal=42%
GO_PHOSPHATE_TRANSMEMBRANE_TRANSPORTER_ACTIVITY	GO_PHOSPHATE_TRANSMEMBRANE_TRANSPORTER_ACTIVITY		30	0.290869	0.975013	0.493097	0.893154	1	2620	tags=23%, list=15%, signal=27%
GO_REGULATION_OF_ACTIN_NUCLEATION	GO_REGULATION_OF_ACTIN_NUCLEATION		26	0.29011	0.974707	0.458586	0.893051	1	1013	tags=15%, list=6%, signal=16%
GO_TRANSCRIPTION_COUPLED_NUCLEOTIDE_EXCISION_REPAIR	GO_TRANSCRIPTION_COUPLED_NUCLEOTIDE_EXCISION_REPAIR		72	0.306549	0.974688	0.471173	0.892218	1	3892	tags=40%, list=22%, signal=51%
GO_CARBON_OXYGEN_LYASE_ACTIVITY	GO_CARBON_OXYGEN_LYASE_ACTIVITY		63	0.285268	0.974214	0.480469	0.892576	1	2424	tags=21%, list=14%, signal=24%
GO_REGULATION_OF_ACTIN_FILAMENT_BASED_MOVEMENT	GO_REGULATION_OF_ACTIN_FILAMENT_BASED_MOVEMENT		32	0.302579	0.974004	0.489109	0.892202	1	2227	tags=19%, list=13%, signal=21%
GO_ISOMERASE_ACTIVITY	GO_ISOMERASE_ACTIVITY		141	0.242308	0.97298	0.480151	0.893825	1	2329	tags=18%, list=13%, signal=21%
GO_REGULATION_OF_DEPHOSPHORYLATION	GO_REGULATION_OF_DEPHOSPHORYLATION		143	0.212391	0.972843	0.493976	0.893284	1	3443	tags=24%, list=19%, signal=30%
GO_MRNA_CLEAVAGE_FACTOR_COMPLEX	GO_MRNA_CLEAVAGE_FACTOR_COMPLEX		17	0.356062	0.972539	0.466403	0.893168	1	2384	tags=35%, list=14%, signal=41%
GO_MICROTUBULE_ORGANIZING_CENTER_PART	GO_MICROTUBULE_ORGANIZING_CENTER_PART		133	0.250137	0.972435	0.482213	0.892574	1	3983	tags=32%, list=23%, signal=41%
GO_NUCLEOTIDE_SUGAR_BIOSYNTHETIC_PROCESS	GO_NUCLEOTIDE_SUGAR_BIOSYNTHETIC_PROCESS		19	0.337842	0.971535	0.486434	0.893911	1	2393	tags=37%, list=14%, signal=43%
GO_STEROL_TRANSPORTER_ACTIVITY	GO_STEROL_TRANSPORTER_ACTIVITY		16	0.35196	0.970374	0.474849	0.895938	1	1974	tags=19%, list=11%, signal=21%
GO_ERROR_FREE_TRANSLESION_SYNTHESIS	GO_ERROR_FREE_TRANSLESION_SYNTHESIS		17	0.400219	0.97035	0.512146	0.89513	1	3892	tags=53%, list=22%, signal=68%
GO_NEGATIVE_REGULATION_OF_HEMOPOIESIS	GO_NEGATIVE_REGULATION_OF_HEMOPOIESIS		121	0.247792	0.969682	0.516461	0.89598	1	3880	tags=31%, list=22%, signal=39%
GO_ORGANIC_CYCLIC_COMPOUND_CATABOLIC_PROCESS	GO_ORGANIC_CYCLIC_COMPOUND_CATABOLIC_PROCESS		406	0.23425	0.968951	0.4714	0.896861	1	4390	tags=28%, list=25%, signal=37%
GO_CELLULAR_RESPONSE_TO_OXIDATIVE_STRESS	GO_CELLULAR_RESPONSE_TO_OXIDATIVE_STRESS		176	0.207788	0.968787	0.503922	0.896413	1	3660	tags=24%, list=21%, signal=31%
GO_RETINA_HOMEOSTASIS	GO_RETINA_HOMEOSTASIS		58	0.266127	0.968378	0.49812	0.896544	1	3259	tags=21%, list=18%, signal=25%
GO_NUCLEOBASE_CONTAINING_COMPOUND_TRANSMEMBRANE_TRANSPORTER_ACTIVITY	GO_NUCLEOBASE_CONTAINING_COMPOUND_TRANSMEMBRANE_TRANSPORTER_ACTIVITY		31	0.290574	0.968083	0.504817	0.896391	1	2620	tags=26%, list=15%, signal=30%
GO_POSITIVE_REGULATION_OF_NIK_NF_KAPPAB_SIGNALING	GO_POSITIVE_REGULATION_OF_NIK_NF_KAPPAB_SIGNALING		29	0.287693	0.968043	0.495968	0.895612	1	4256	tags=45%, list=24%, signal=59%
GO_SERTOLI_CELL_DIFFERENTIATION	GO_SERTOLI_CELL_DIFFERENTIATION		18	0.335641	0.967374	0.47205	0.896433	1	4110	tags=39%, list=23%, signal=51%
GO_MRNA_3_END_PROCESSING	GO_MRNA_3_END_PROCESSING		70	0.306299	0.967179	0.477228	0.896058	1	4301	tags=43%, list=24%, signal=56%
GO_NEGATIVE_REGULATION_OF_TRANSPORTER_ACTIVITY	GO_NEGATIVE_REGULATION_OF_TRANSPORTER_ACTIVITY		60	0.250456	0.96671	0.481328	0.896366	1	4066	tags=23%, list=23%, signal=30%
GO_FOLIC_ACID_METABOLIC_PROCESS	GO_FOLIC_ACID_METABOLIC_PROCESS		17	0.362784	0.966563	0.480989	0.895866	1	2645	tags=29%, list=15%, signal=35%
GO_REGULATION_OF_MRNA_SPLICING_VIA_SPLICEOSOME	GO_REGULATION_OF_MRNA_SPLICING_VIA_SPLICEOSOME		58	0.284678	0.966391	0.490157	0.89543	1	2722	tags=28%, list=15%, signal=33%
GO_HISTONE_PHOSPHORYLATION	GO_HISTONE_PHOSPHORYLATION		24	0.30514	0.966262	0.495127	0.894907	1	4097	tags=38%, list=23%, signal=49%
GO_ORGANELLAR_RIBOSOME	GO_ORGANELLAR_RIBOSOME		67	0.402415	0.965817	0.518234	0.895152	1	4190	tags=42%, list=24%, signal=55%
GO_AEROBIC_RESPIRATION	GO_AEROBIC_RESPIRATION		49	0.344903	0.965538	0.508772	0.894945	1	3506	tags=37%, list=20%, signal=46%
GO_PURINE_NUCLEOSIDE_BIOSYNTHETIC_PROCESS	GO_PURINE_NUCLEOSIDE_BIOSYNTHETIC_PROCESS		81	0.30645	0.965532	0.502982	0.8941	1	4261	tags=37%, list=24%, signal=49%
GO_TOR_SIGNALING	GO_TOR_SIGNALING		16	0.311601	0.96527	0.502008	0.893863	1	1311	tags=19%, list=7%, signal=20%
GO_INTRAMOLECULAR_TRANSFERASE_ACTIVITY	GO_INTRAMOLECULAR_TRANSFERASE_ACTIVITY		26	0.334903	0.965224	0.5	0.893134	1	1685	tags=23%, list=10%, signal=25%
GO_CELLULAR_RESPONSE_TO_UV	GO_CELLULAR_RESPONSE_TO_UV		65	0.24378	0.965199	0.486538	0.892338	1	3503	tags=29%, list=20%, signal=36%
GO_POSITIVE_REGULATION_OF_INTERFERON_ALPHA_PRODUCTION	GO_POSITIVE_REGULATION_OF_INTERFERON_ALPHA_PRODUCTION		16	0.343886	0.964926	0.49896	0.89218	1	1805	tags=25%, list=10%, signal=28%
GO_PROTON_TRANSPORTING_ATP_SYNTHASE_COMPLEX	GO_PROTON_TRANSPORTING_ATP_SYNTHASE_COMPLEX		22	0.457673	0.964321	0.55315	0.892779	1	4622	tags=45%, list=26%, signal=61%
GO_RESPONSE_TO_ZINC_ION	GO_RESPONSE_TO_ZINC_ION		53	0.267099	0.96371	0.506903	0.893437	1	957	tags=11%, list=5%, signal=12%
GO_ENDOTHELIAL_CELL_DEVELOPMENT	GO_ENDOTHELIAL_CELL_DEVELOPMENT		44	0.286093	0.96351	0.482966	0.893093	1	2456	tags=25%, list=14%, signal=29%
GO_NEGATIVE_REGULATION_OF_CYTOSKELETON_ORGANIZATION	GO_NEGATIVE_REGULATION_OF_CYTOSKELETON_ORGANIZATION		202	0.220548	0.963452	0.493852	0.892387	1	3648	tags=26%, list=21%, signal=33%
GO_MODIFICATION_OF_MORPHOLOGY_OR_PHYSIOLOGY_OF_OTHER_ORGANISM	GO_MODIFICATION_OF_MORPHOLOGY_OR_PHYSIOLOGY_OF_OTHER_ORGANISM		90	0.231815	0.963201	0.500949	0.892146	1	2450	tags=16%, list=14%, signal=18%
GO_MODULATION_OF_TRANSCRIPTION_IN_OTHER_ORGANISM_INVOLVED_IN_SYMBIOTIC_INTERACTION	GO_MODULATION_OF_TRANSCRIPTION_IN_OTHER_ORGANISM_INVOLVED_IN_SYMBIOTIC_INTERACTION		22	0.29562	0.962855	0.481696	0.89213	1	787	tags=14%, list=4%, signal=14%
GO_MEIOTIC_CELL_CYCLE_PROCESS	GO_MEIOTIC_CELL_CYCLE_PROCESS		121	0.257835	0.962169	0.486	0.892981	1	3872	tags=29%, list=22%, signal=37%
GO_NECROTIC_CELL_DEATH	GO_NECROTIC_CELL_DEATH		28	0.306404	0.96206	0.502994	0.892428	1	2466	tags=29%, list=14%, signal=33%
GO_RAS_PROTEIN_SIGNAL_TRANSDUCTION	GO_RAS_PROTEIN_SIGNAL_TRANSDUCTION		139	0.228525	0.961542	0.492958	0.892884	1	3174	tags=24%, list=18%, signal=29%
GO_FATTY_ACYL_COA_METABOLIC_PROCESS	GO_FATTY_ACYL_COA_METABOLIC_PROCESS		45	0.276809	0.960096	0.514395	0.895615	1	1824	tags=20%, list=10%, signal=22%
GO_IRON_ION_HOMEOSTASIS	GO_IRON_ION_HOMEOSTASIS		62	0.251283	0.959891	0.493852	0.89527	1	3507	tags=23%, list=20%, signal=28%
GO_FAT_CELL_DIFFERENTIATION	GO_FAT_CELL_DIFFERENTIATION		99	0.236077	0.95953	0.519427	0.895306	1	3035	tags=21%, list=17%, signal=25%
GO_STEROL_BIOSYNTHETIC_PROCESS	GO_STEROL_BIOSYNTHETIC_PROCESS		40	0.324602	0.959221	0.478599	0.895227	1	1974	tags=23%, list=11%, signal=25%
GO_PRIMARY_CILIUM	GO_PRIMARY_CILIUM		182	0.218612	0.958912	0.494141	0.8951	1	3885	tags=25%, list=22%, signal=31%
GO_REGULATION_OF_EPIDERMAL_GROWTH_FACTOR_ACTIVATED_RECEPTOR_ACTIVITY	GO_REGULATION_OF_EPIDERMAL_GROWTH_FACTOR_ACTIVATED_RECEPTOR_ACTIVITY		22	0.301479	0.958514	0.5	0.895273	1	1148	tags=14%, list=7%, signal=15%
GO_PROTEIN_KINASE_A_BINDING	GO_PROTEIN_KINASE_A_BINDING		41	0.262501	0.958303	0.51046	0.894956	1	4499	tags=37%, list=25%, signal=49%
GO_RIBONUCLEOPROTEIN_COMPLEX_LOCALIZATION	GO_RIBONUCLEOPROTEIN_COMPLEX_LOCALIZATION		110	0.290723	0.957889	0.476578	0.895164	1	3581	tags=35%, list=20%, signal=43%
GO_IMMUNOGLOBULIN_PRODUCTION_INVOLVED_IN_IMMUNOGLOBULIN_MEDIATED_IMMUNE_RESPONSE	GO_IMMUNOGLOBULIN_PRODUCTION_INVOLVED_IN_IMMUNOGLOBULIN_MEDIATED_IMMUNE_RESPONSE		22	0.325808	0.957656	0.512097	0.894895	1	3872	tags=32%, list=22%, signal=41%
GO_DEVELOPMENT_OF_PRIMARY_SEXUAL_CHARACTERISTICS	GO_DEVELOPMENT_OF_PRIMARY_SEXUAL_CHARACTERISTICS		192	0.206509	0.957446	0.514523	0.894575	1	3468	tags=20%, list=20%, signal=24%
GO_CATALYTIC_STEP_2_SPLICEOSOME	GO_CATALYTIC_STEP_2_SPLICEOSOME		84	0.308803	0.956764	0.495049	0.895369	1	3587	tags=36%, list=20%, signal=45%
GO_NEGATIVE_REGULATION_OF_LIPID_METABOLIC_PROCESS	GO_NEGATIVE_REGULATION_OF_LIPID_METABOLIC_PROCESS		75	0.232468	0.956629	0.542574	0.894861	1	1581	tags=12%, list=9%, signal=13%
GO_THIOLESTER_HYDROLASE_ACTIVITY	GO_THIOLESTER_HYDROLASE_ACTIVITY		30	0.302529	0.955746	0.521739	0.896203	1	1515	tags=20%, list=9%, signal=22%
GO_POSITIVE_REGULATION_OF_MACROPHAGE_DERIVED_FOAM_CELL_DIFFERENTIATION	GO_POSITIVE_REGULATION_OF_MACROPHAGE_DERIVED_FOAM_CELL_DIFFERENTIATION		15	0.349273	0.955638	0.505976	0.895621	1	59	tags=7%, list=0%, signal=7%
GO_HORMONE_TRANSPORT	GO_HORMONE_TRANSPORT		71	0.252043	0.954278	0.530888	0.898212	1	1609	tags=13%, list=9%, signal=14%
GO_RNA_MODIFICATION	GO_RNA_MODIFICATION		106	0.289076	0.954083	0.496982	0.897837	1	3223	tags=32%, list=18%, signal=39%
GO_REGULATION_OF_LONG_TERM_SYNAPTIC_POTENTIATION	GO_REGULATION_OF_LONG_TERM_SYNAPTIC_POTENTIATION		19	0.324334	0.95358	0.526749	0.898248	1	3086	tags=26%, list=17%, signal=32%
GO_MITOCHONDRIAL_ATP_SYNTHESIS_COUPLED_PROTON_TRANSPORT	GO_MITOCHONDRIAL_ATP_SYNTHESIS_COUPLED_PROTON_TRANSPORT		17	0.464926	0.953195	0.560694	0.89831	1	2914	tags=35%, list=17%, signal=42%
GO_PROSTATE_GLAND_DEVELOPMENT	GO_PROSTATE_GLAND_DEVELOPMENT		41	0.274396	0.953012	0.522449	0.897928	1	2178	tags=15%, list=12%, signal=17%
GO_ORGANOPHOSPHATE_ESTER_TRANSPORT	GO_ORGANOPHOSPHATE_ESTER_TRANSPORT		84	0.230233	0.952842	0.508772	0.897517	1	3193	tags=19%, list=18%, signal=23%
GO_REGULATION_OF_MYELOID_CELL_APOPTOTIC_PROCESS	GO_REGULATION_OF_MYELOID_CELL_APOPTOTIC_PROCESS		23	0.300855	0.952679	0.522682	0.897077	1	2112	tags=17%, list=12%, signal=20%
GO_REGULATION_OF_MONOOXYGENASE_ACTIVITY	GO_REGULATION_OF_MONOOXYGENASE_ACTIVITY		59	0.238685	0.952388	0.53144	0.896954	1	1952	tags=17%, list=11%, signal=19%
GO_INTERSTRAND_CROSS_LINK_REPAIR	GO_INTERSTRAND_CROSS_LINK_REPAIR		38	0.320465	0.951933	0.497053	0.897205	1	4186	tags=45%, list=24%, signal=59%
GO_MANNOSYLATION	GO_MANNOSYLATION		29	0.303571	0.951245	0.522593	0.898111	1	2643	tags=34%, list=15%, signal=40%
GO_ORGANELLE_INNER_MEMBRANE	GO_ORGANELLE_INNER_MEMBRANE		478	0.297166	0.950913	0.513944	0.89809	1	4190	tags=35%, list=24%, signal=45%
GO_MOTILE_CILIUM	GO_MOTILE_CILIUM		87	0.237466	0.950859	0.515444	0.8974	1	5393	tags=37%, list=31%, signal=53%
GO_MITOCHONDRIAL_RNA_METABOLIC_PROCESS	GO_MITOCHONDRIAL_RNA_METABOLIC_PROCESS		23	0.367444	0.950606	0.521739	0.897192	1	3940	tags=52%, list=22%, signal=67%
GO_RESPIRATORY_CHAIN	GO_RESPIRATORY_CHAIN		76	0.391719	0.950508	0.528487	0.896596	1	3637	tags=38%, list=21%, signal=48%
GO_SEX_DIFFERENTIATION	GO_SEX_DIFFERENTIATION		237	0.204272	0.950253	0.542117	0.896403	1	3660	tags=20%, list=21%, signal=25%
GO_SMALL_RIBOSOMAL_SUBUNIT	GO_SMALL_RIBOSOMAL_SUBUNIT		65	0.3964	0.949799	0.558366	0.896696	1	4360	tags=40%, list=25%, signal=53%
GO_PROTEIN_OLIGOMERIZATION	GO_PROTEIN_OLIGOMERIZATION		411	0.19421	0.949197	0.516129	0.897325	1	3052	tags=20%, list=17%, signal=24%
GO_MITOCHONDRIAL_TRANSMEMBRANE_TRANSPORT	GO_MITOCHONDRIAL_TRANSMEMBRANE_TRANSPORT		52	0.350445	0.948889	0.522682	0.89725	1	2914	tags=29%, list=17%, signal=34%
GO_NEGATIVE_REGULATION_OF_T_CELL_PROLIFERATION	GO_NEGATIVE_REGULATION_OF_T_CELL_PROLIFERATION		48	0.281799	0.948869	0.514735	0.896472	1	2116	tags=19%, list=12%, signal=21%
GO_RIBOSOMAL_SUBUNIT	GO_RIBOSOMAL_SUBUNIT		155	0.383853	0.948746	0.53831	0.895943	1	4151	tags=37%, list=24%, signal=48%
GO_NEGATIVE_REGULATION_OF_FATTY_ACID_METABOLIC_PROCESS	GO_NEGATIVE_REGULATION_OF_FATTY_ACID_METABOLIC_PROCESS		28	0.295587	0.948622	0.523622	0.895415	1	2369	tags=18%, list=13%, signal=21%
GO_VESICLE_MEMBRANE	GO_VESICLE_MEMBRANE		483	0.206855	0.948606	0.545825	0.894636	1	3467	tags=21%, list=20%, signal=25%
GO_NEGATIVE_REGULATION_OF_TRANSMEMBRANE_TRANSPORT	GO_NEGATIVE_REGULATION_OF_TRANSMEMBRANE_TRANSPORT		80	0.23111	0.947196	0.52621	0.897461	1	4175	tags=24%, list=24%, signal=31%
GO_CELLULAR_AMINO_ACID_METABOLIC_PROCESS	GO_CELLULAR_AMINO_ACID_METABOLIC_PROCESS		312	0.223615	0.946731	0.492366	0.897725	1	4321	tags=28%, list=24%, signal=36%
GO_REGULATION_OF_ACTION_POTENTIAL	GO_REGULATION_OF_ACTION_POTENTIAL		36	0.285592	0.946702	0.517787	0.896966	1	4098	tags=28%, list=23%, signal=36%
GO_COENZYME_METABOLIC_PROCESS	GO_COENZYME_METABOLIC_PROCESS		243	0.251966	0.946199	0.49522	0.897373	1	2682	tags=21%, list=15%, signal=24%
GO_RESPONSE_TO_PLATELET_DERIVED_GROWTH_FACTOR	GO_RESPONSE_TO_PLATELET_DERIVED_GROWTH_FACTOR		18	0.327512	0.945912	0.524	0.897312	1	2314	tags=28%, list=13%, signal=32%
GO_REGULATION_OF_DNA_DEPENDENT_DNA_REPLICATION	GO_REGULATION_OF_DNA_DEPENDENT_DNA_REPLICATION		39	0.322082	0.945388	0.536145	0.897751	1	4126	tags=46%, list=23%, signal=60%
GO_RESPONSE_TO_LIGHT_STIMULUS	GO_RESPONSE_TO_LIGHT_STIMULUS		259	0.198662	0.945102	0.598394	0.897678	1	3310	tags=21%, list=19%, signal=26%
GO_POSITIVE_REGULATION_OF_MUSCLE_HYPERTROPHY	GO_POSITIVE_REGULATION_OF_MUSCLE_HYPERTROPHY		21	0.304861	0.944903	0.547094	0.89735	1	2024	tags=24%, list=11%, signal=27%
GO_TRNA_METHYLATION	GO_TRNA_METHYLATION		20	0.369178	0.944639	0.515856	0.897178	1	2807	tags=40%, list=16%, signal=48%
GO_NUCLEAR_REPLICATION_FORK	GO_NUCLEAR_REPLICATION_FORK		39	0.333124	0.944244	0.531313	0.897317	1	4130	tags=44%, list=23%, signal=57%
GO_CELLULAR_COMPONENT_DISASSEMBLY	GO_CELLULAR_COMPONENT_DISASSEMBLY		485	0.204428	0.944099	0.516699	0.896846	1	4108	tags=27%, list=23%, signal=34%
GO_RNA_3_END_PROCESSING	GO_RNA_3_END_PROCESSING		95	0.286825	0.94392	0.482353	0.8965	1	4301	tags=40%, list=24%, signal=53%
GO_PHOSPHOLIPID_TRANSLOCATING_ATPASE_ACTIVITY	GO_PHOSPHOLIPID_TRANSLOCATING_ATPASE_ACTIVITY		16	0.351841	0.942769	0.518962	0.898433	1	6225	tags=56%, list=35%, signal=87%
GO_REGULATION_OF_DNA_BIOSYNTHETIC_PROCESS	GO_REGULATION_OF_DNA_BIOSYNTHETIC_PROCESS		90	0.221346	0.942077	0.528942	0.899335	1	3120	tags=24%, list=18%, signal=30%
GO_REGULATION_OF_ENDOPLASMIC_RETICULUM_UNFOLDED_PROTEIN_RESPONSE	GO_REGULATION_OF_ENDOPLASMIC_RETICULUM_UNFOLDED_PROTEIN_RESPONSE		25	0.283965	0.942062	0.543137	0.89855	1	3323	tags=32%, list=19%, signal=39%
GO_GROWTH_FACTOR_RECEPTOR_BINDING	GO_GROWTH_FACTOR_RECEPTOR_BINDING		120	0.238743	0.941812	0.518962	0.898383	1	3109	tags=18%, list=18%, signal=22%
GO_UDP_GLYCOSYLTRANSFERASE_ACTIVITY	GO_UDP_GLYCOSYLTRANSFERASE_ACTIVITY		125	0.227221	0.941309	0.535509	0.898765	1	3891	tags=24%, list=22%, signal=31%
GO_IRON_ION_TRANSPORT	GO_IRON_ION_TRANSPORT		51	0.25584	0.940627	0.509881	0.899547	1	3507	tags=25%, list=20%, signal=32%
GO_MIDDLE_EAR_MORPHOGENESIS	GO_MIDDLE_EAR_MORPHOGENESIS		20	0.311726	0.939914	0.512871	0.900449	1	624	tags=10%, list=4%, signal=10%
GO_RNA_SPLICING_VIA_TRANSESTERIFICATION_REACTIONS	GO_RNA_SPLICING_VIA_TRANSESTERIFICATION_REACTIONS		258	0.273716	0.939888	0.499006	0.899707	1	4306	tags=38%, list=24%, signal=50%
GO_REGULATION_OF_NFAT_PROTEIN_IMPORT_INTO_NUCLEUS	GO_REGULATION_OF_NFAT_PROTEIN_IMPORT_INTO_NUCLEUS		16	0.322222	0.939373	0.564682	0.900074	1	2270	tags=31%, list=13%, signal=36%
GO_NEGATIVE_REGULATION_OF_CHROMATIN_MODIFICATION	GO_NEGATIVE_REGULATION_OF_CHROMATIN_MODIFICATION		44	0.253707	0.939328	0.507071	0.899373	1	2193	tags=20%, list=12%, signal=23%
GO_NEGATIVE_REGULATION_OF_MEIOTIC_CELL_CYCLE	GO_NEGATIVE_REGULATION_OF_MEIOTIC_CELL_CYCLE		16	0.312172	0.938184	0.542914	0.90135	1	2426	tags=25%, list=14%, signal=29%
GO_RNA_CAPPING	GO_RNA_CAPPING		34	0.320125	0.937713	0.528046	0.901668	1	3517	tags=44%, list=20%, signal=55%
GO_ENDOPLASMIC_RETICULUM_GOLGI_INTERMEDIATE_COMPARTMENT_MEMBRANE	GO_ENDOPLASMIC_RETICULUM_GOLGI_INTERMEDIATE_COMPARTMENT_MEMBRANE		57	0.255253	0.937391	0.528487	0.90167	1	1604	tags=16%, list=9%, signal=17%
GO_MAINTENANCE_OF_CELL_NUMBER	GO_MAINTENANCE_OF_CELL_NUMBER		126	0.211812	0.937103	0.579365	0.901597	1	2342	tags=17%, list=13%, signal=20%
GO_REGULATION_OF_MYELINATION	GO_REGULATION_OF_MYELINATION		29	0.276598	0.936878	0.560924	0.901357	1	3646	tags=28%, list=21%, signal=35%
GO_CILIUM	GO_CILIUM		402	0.203099	0.936366	0.557312	0.901825	1	4784	tags=31%, list=27%, signal=41%
GO_INTERCALATED_DISC	GO_INTERCALATED_DISC		51	0.28154	0.936231	0.513889	0.901376	1	4481	tags=33%, list=25%, signal=45%
GO_REGULATION_OF_DOUBLE_STRAND_BREAK_REPAIR	GO_REGULATION_OF_DOUBLE_STRAND_BREAK_REPAIR		33	0.276176	0.936084	0.545635	0.900946	1	3780	tags=36%, list=21%, signal=46%
GO_WATER_SOLUBLE_VITAMIN_METABOLIC_PROCESS	GO_WATER_SOLUBLE_VITAMIN_METABOLIC_PROCESS		83	0.244232	0.935682	0.541353	0.901151	1	3095	tags=22%, list=18%, signal=26%
GO_ANTIGEN_PROCESSING_AND_PRESENTATION_OF_PEPTIDE_ANTIGEN_VIA_MHC_CLASS_I	GO_ANTIGEN_PROCESSING_AND_PRESENTATION_OF_PEPTIDE_ANTIGEN_VIA_MHC_CLASS_I		89	0.282642	0.935629	0.509506	0.900481	1	3485	tags=25%, list=20%, signal=31%
GO_CELL_AGING	GO_CELL_AGING		65	0.229388	0.935352	0.601547	0.900313	1	3752	tags=29%, list=21%, signal=37%
GO_CELLULAR_RESPONSE_TO_LIGHT_STIMULUS	GO_CELLULAR_RESPONSE_TO_LIGHT_STIMULUS		84	0.222953	0.935253	0.565558	0.899751	1	3503	tags=26%, list=20%, signal=33%
GO_ALCOHOL_TRANSMEMBRANE_TRANSPORTER_ACTIVITY	GO_ALCOHOL_TRANSMEMBRANE_TRANSPORTER_ACTIVITY		23	0.314816	0.935022	0.537037	0.899474	1	2671	tags=22%, list=15%, signal=26%
GO_NUCLEOBASE_CONTAINING_SMALL_MOLECULE_METABOLIC_PROCESS	GO_NUCLEOBASE_CONTAINING_SMALL_MOLECULE_METABOLIC_PROCESS		495	0.232613	0.934651	0.522863	0.899553	1	4089	tags=27%, list=23%, signal=34%
GO_ENTRAINMENT_OF_CIRCADIAN_CLOCK	GO_ENTRAINMENT_OF_CIRCADIAN_CLOCK		25	0.27089	0.934642	0.536122	0.898786	1	311	tags=12%, list=2%, signal=12%
GO_RESPONSE_TO_FIBROBLAST_GROWTH_FACTOR	GO_RESPONSE_TO_FIBROBLAST_GROWTH_FACTOR		111	0.217814	0.934248	0.563745	0.898968	1	3978	tags=24%, list=23%, signal=31%
GO_INSULIN_SECRETION	GO_INSULIN_SECRETION		35	0.280179	0.933745	0.567568	0.899461	1	1609	tags=14%, list=9%, signal=16%
GO_NEGATIVE_REGULATION_OF_DNA_DEPENDENT_DNA_REPLICATION	GO_NEGATIVE_REGULATION_OF_DNA_DEPENDENT_DNA_REPLICATION		15	0.388182	0.933318	0.557652	0.899686	1	4749	tags=60%, list=27%, signal=82%
GO_CAMP_BINDING	GO_CAMP_BINDING		21	0.318429	0.933118	0.540084	0.8994	1	4961	tags=43%, list=28%, signal=60%
GO_APOPTOTIC_MITOCHONDRIAL_CHANGES	GO_APOPTOTIC_MITOCHONDRIAL_CHANGES		56	0.252008	0.933048	0.548515	0.898779	1	2070	tags=18%, list=12%, signal=20%
GO_POSITIVE_REGULATION_OF_PROTEIN_LOCALIZATION_TO_NUCLEUS	GO_POSITIVE_REGULATION_OF_PROTEIN_LOCALIZATION_TO_NUCLEUS		126	0.204997	0.932627	0.576541	0.898999	1	1536	tags=13%, list=9%, signal=14%
GO_CELLULAR_RESPONSE_TO_MECHANICAL_STIMULUS	GO_CELLULAR_RESPONSE_TO_MECHANICAL_STIMULUS		78	0.244934	0.932018	0.508946	0.899601	1	2447	tags=18%, list=14%, signal=21%
GO_MEMBRANE_LIPID_METABOLIC_PROCESS	GO_MEMBRANE_LIPID_METABOLIC_PROCESS		170	0.217187	0.931681	0.548387	0.899677	1	4249	tags=30%, list=24%, signal=39%
GO_FATTY_ACID_LIGASE_ACTIVITY	GO_FATTY_ACID_LIGASE_ACTIVITY		16	0.316964	0.931528	0.556911	0.899242	1	1504	tags=19%, list=9%, signal=20%
GO_CIRCADIAN_RHYTHM	GO_CIRCADIAN_RHYTHM		125	0.208244	0.931508	0.590909	0.898493	1	3599	tags=25%, list=20%, signal=31%
GO_NEGATIVE_REGULATION_OF_INTRACELLULAR_TRANSPORT	GO_NEGATIVE_REGULATION_OF_INTRACELLULAR_TRANSPORT		135	0.210145	0.931131	0.582661	0.898544	1	1669	tags=13%, list=9%, signal=15%
GO_MITOCHONDRIAL_PROTEIN_COMPLEX	GO_MITOCHONDRIAL_PROTEIN_COMPLEX		126	0.363357	0.93091	0.546535	0.898317	1	3805	tags=38%, list=22%, signal=48%
GO_POSITIVE_REGULATION_OF_MITOCHONDRIAL_MEMBRANE_PERMEABILITY	GO_POSITIVE_REGULATION_OF_MITOCHONDRIAL_MEMBRANE_PERMEABILITY		18	0.306144	0.930444	0.570281	0.89864	1	2320	tags=28%, list=13%, signal=32%
GO_PURINE_NTP_DEPENDENT_HELICASE_ACTIVITY	GO_PURINE_NTP_DEPENDENT_HELICASE_ACTIVITY		94	0.278204	0.930233	0.530214	0.898341	1	1957	tags=24%, list=11%, signal=27%
GO_AMINOPEPTIDASE_ACTIVITY	GO_AMINOPEPTIDASE_ACTIVITY		40	0.239909	0.930139	0.564155	0.897811	1	4352	tags=33%, list=25%, signal=43%
GO_GLYCOSYL_COMPOUND_BIOSYNTHETIC_PROCESS	GO_GLYCOSYL_COMPOUND_BIOSYNTHETIC_PROCESS		107	0.280675	0.929995	0.534517	0.897376	1	4261	tags=35%, list=24%, signal=45%
GO_DNA_TEMPLATED_TRANSCRIPTION_TERMINATION	GO_DNA_TEMPLATED_TRANSCRIPTION_TERMINATION		97	0.29527	0.929697	0.501976	0.897329	1	4301	tags=41%, list=24%, signal=54%
GO_CHROMOSOME_ORGANIZATION_INVOLVED_IN_MEIOTIC_CELL_CYCLE	GO_CHROMOSOME_ORGANIZATION_INVOLVED_IN_MEIOTIC_CELL_CYCLE		37	0.281539	0.929401	0.544534	0.897231	1	3797	tags=24%, list=22%, signal=31%
GO_PROTON_TRANSPORTING_TWO_SECTOR_ATPASE_COMPLEX	GO_PROTON_TRANSPORTING_TWO_SECTOR_ATPASE_COMPLEX		46	0.334823	0.929381	0.543033	0.896504	1	3225	tags=30%, list=18%, signal=37%
GO_PHOTOPERIODISM	GO_PHOTOPERIODISM		23	0.276306	0.929156	0.565048	0.896271	1	311	tags=13%, list=2%, signal=13%
GO_RESPONSE_TO_AMINO_ACID	GO_RESPONSE_TO_AMINO_ACID		104	0.219414	0.929106	0.580122	0.895594	1	2794	tags=18%, list=16%, signal=22%
GO_POSITIVE_REGULATION_OF_MUSCLE_TISSUE_DEVELOPMENT	GO_POSITIVE_REGULATION_OF_MUSCLE_TISSUE_DEVELOPMENT		51	0.262311	0.928944	0.5629	0.895221	1	4548	tags=29%, list=26%, signal=40%
GO_PARAXIAL_MESODERM_DEVELOPMENT	GO_PARAXIAL_MESODERM_DEVELOPMENT		16	0.341853	0.928694	0.540373	0.894999	1	4010	tags=38%, list=23%, signal=48%
GO_CELLULAR_RESPONSE_TO_GAMMA_RADIATION	GO_CELLULAR_RESPONSE_TO_GAMMA_RADIATION		19	0.306256	0.927864	0.541502	0.896179	1	3539	tags=32%, list=20%, signal=39%
GO_CELLULAR_ALDEHYDE_METABOLIC_PROCESS	GO_CELLULAR_ALDEHYDE_METABOLIC_PROCESS		77	0.266165	0.927677	0.534884	0.895857	1	3468	tags=26%, list=20%, signal=32%
GO_ADIPOSE_TISSUE_DEVELOPMENT	GO_ADIPOSE_TISSUE_DEVELOPMENT		30	0.275126	0.927452	0.565574	0.895609	1	4110	tags=37%, list=23%, signal=48%
GO_CELLULAR_RESPONSE_TO_AMINO_ACID_STIMULUS	GO_CELLULAR_RESPONSE_TO_AMINO_ACID_STIMULUS		47	0.264637	0.92741	0.525253	0.894924	1	2418	tags=19%, list=14%, signal=22%
GO_REGULATION_OF_ENDOPLASMIC_RETICULUM_STRESS_INDUCED_INTRINSIC_APOPTOTIC_SIGNALING_PATHWAY	GO_REGULATION_OF_ENDOPLASMIC_RETICULUM_STRESS_INDUCED_INTRINSIC_APOPTOTIC_SIGNALING_PATHWAY		27	0.27264	0.927168	0.532692	0.8947	1	2417	tags=22%, list=14%, signal=26%
GO_MONOCARBOXYLIC_ACID_BIOSYNTHETIC_PROCESS	GO_MONOCARBOXYLIC_ACID_BIOSYNTHETIC_PROCESS		153	0.211941	0.926789	0.588822	0.894779	1	1637	tags=12%, list=9%, signal=13%
GO_MEMBRANE_LIPID_BIOSYNTHETIC_PROCESS	GO_MEMBRANE_LIPID_BIOSYNTHETIC_PROCESS		105	0.226923	0.926608	0.556641	0.894403	1	2756	tags=22%, list=16%, signal=26%
GO_SIGNAL_PEPTIDE_PROCESSING	GO_SIGNAL_PEPTIDE_PROCESSING		22	0.316602	0.9254	0.559184	0.896403	1	3941	tags=41%, list=22%, signal=53%
GO_MAMMARY_GLAND_LOBULE_DEVELOPMENT	GO_MAMMARY_GLAND_LOBULE_DEVELOPMENT		17	0.300219	0.925208	0.556485	0.896073	1	4841	tags=35%, list=27%, signal=49%
GO_ENDORIBONUCLEASE_ACTIVITY	GO_ENDORIBONUCLEASE_ACTIVITY		45	0.284323	0.924893	0.539216	0.896005	1	3127	tags=27%, list=18%, signal=32%
GO_PALLIUM_DEVELOPMENT	GO_PALLIUM_DEVELOPMENT		148	0.219222	0.92488	0.56487	0.895272	1	5253	tags=34%, list=30%, signal=49%
GO_INTERFERON_GAMMA_PRODUCTION	GO_INTERFERON_GAMMA_PRODUCTION		15	0.36192	0.924627	0.533469	0.895123	1	1817	tags=20%, list=10%, signal=22%
GO_RESPONSE_TO_RADIATION	GO_RESPONSE_TO_RADIATION		383	0.186969	0.924582	0.608187	0.894454	1	3310	tags=20%, list=19%, signal=25%
GO_PHOSPHATIDYLINOSITOL_3_KINASE_COMPLEX	GO_PHOSPHATIDYLINOSITOL_3_KINASE_COMPLEX		19	0.331213	0.924235	0.539806	0.894521	1	2509	tags=32%, list=14%, signal=37%
GO_REGULATION_OF_GLIAL_CELL_PROLIFERATION	GO_REGULATION_OF_GLIAL_CELL_PROLIFERATION		21	0.284791	0.924185	0.585417	0.893854	1	957	tags=14%, list=5%, signal=15%
GO_ESTABLISHMENT_OR_MAINTENANCE_OF_CELL_POLARITY	GO_ESTABLISHMENT_OR_MAINTENANCE_OF_CELL_POLARITY		134	0.219349	0.9241	0.536082	0.893294	1	1992	tags=16%, list=11%, signal=18%
GO_ROUGH_ENDOPLASMIC_RETICULUM	GO_ROUGH_ENDOPLASMIC_RETICULUM		66	0.230959	0.923914	0.559118	0.892992	1	1915	tags=14%, list=11%, signal=15%
GO_POSITIVE_REGULATION_OF_ACTIN_FILAMENT_POLYMERIZATION	GO_POSITIVE_REGULATION_OF_ACTIN_FILAMENT_POLYMERIZATION		62	0.240237	0.923302	0.55754	0.89367	1	1684	tags=16%, list=10%, signal=18%
GO_PHOSPHATIDIC_ACID_METABOLIC_PROCESS	GO_PHOSPHATIDIC_ACID_METABOLIC_PROCESS		30	0.269854	0.923282	0.566075	0.892963	1	4332	tags=33%, list=25%, signal=44%
GO_MITOCHONDRIAL_TRANSPORT	GO_MITOCHONDRIAL_TRANSPORT		160	0.262568	0.922952	0.555336	0.892996	1	3301	tags=26%, list=19%, signal=32%
GO_CYTOSOLIC_LARGE_RIBOSOMAL_SUBUNIT	GO_CYTOSOLIC_LARGE_RIBOSOMAL_SUBUNIT		58	0.390704	0.922218	0.556863	0.89393	1	4150	tags=36%, list=24%, signal=47%
GO_MEMBRANE_PROTEIN_ECTODOMAIN_PROTEOLYSIS	GO_MEMBRANE_PROTEIN_ECTODOMAIN_PROTEOLYSIS		21	0.290272	0.922161	0.564706	0.893301	1	3102	tags=29%, list=18%, signal=35%
GO_POSITIVE_REGULATION_OF_SIGNAL_TRANSDUCTION_BY_P53_CLASS_MEDIATOR	GO_POSITIVE_REGULATION_OF_SIGNAL_TRANSDUCTION_BY_P53_CLASS_MEDIATOR		17	0.30329	0.921958	0.566474	0.893042	1	3539	tags=29%, list=20%, signal=37%
GO_POSITIVE_REGULATION_OF_TRANSCRIPTION_FROM_RNA_POLYMERASE_II_PROMOTER_IN_RESPONSE_TO_STRESS	GO_POSITIVE_REGULATION_OF_TRANSCRIPTION_FROM_RNA_POLYMERASE_II_PROMOTER_IN_RESPONSE_TO_STRESS		21	0.284896	0.921665	0.552894	0.892979	1	1181	tags=14%, list=7%, signal=15%
GO_SMN_SM_PROTEIN_COMPLEX	GO_SMN_SM_PROTEIN_COMPLEX		17	0.408638	0.921565	0.553571	0.892458	1	4812	tags=53%, list=27%, signal=73%
GO_RESPONSE_TO_DIETARY_EXCESS	GO_RESPONSE_TO_DIETARY_EXCESS		19	0.301454	0.921205	0.574037	0.892556	1	3508	tags=26%, list=20%, signal=33%
GO_REGULATION_OF_FIBROBLAST_PROLIFERATION	GO_REGULATION_OF_FIBROBLAST_PROLIFERATION		80	0.22684	0.920785	0.580448	0.892731	1	1843	tags=16%, list=10%, signal=18%
GO_SMAD_PROTEIN_SIGNAL_TRANSDUCTION	GO_SMAD_PROTEIN_SIGNAL_TRANSDUCTION		52	0.259136	0.920087	0.556468	0.893587	1	1432	tags=12%, list=8%, signal=13%
GO_CYTOKINE_METABOLIC_PROCESS	GO_CYTOKINE_METABOLIC_PROCESS		16	0.317957	0.92007	0.580042	0.892873	1	3546	tags=31%, list=20%, signal=39%
GO_MITOCHONDRIAL_GENOME_MAINTENANCE	GO_MITOCHONDRIAL_GENOME_MAINTENANCE		20	0.302829	0.919202	0.551587	0.894112	1	4140	tags=40%, list=23%, signal=52%
GO_PEPTIDYL_LYSINE_METHYLATION	GO_PEPTIDYL_LYSINE_METHYLATION		55	0.266008	0.919035	0.579568	0.893738	1	4193	tags=44%, list=24%, signal=57%
GO_RESPONSE_TO_GAMMA_RADIATION	GO_RESPONSE_TO_GAMMA_RADIATION		49	0.248513	0.918992	0.574597	0.893101	1	4956	tags=35%, list=28%, signal=48%
GO_REGULATION_OF_CELLULAR_KETONE_METABOLIC_PROCESS	GO_REGULATION_OF_CELLULAR_KETONE_METABOLIC_PROCESS		165	0.21171	0.918534	0.574427	0.893423	1	3747	tags=23%, list=21%, signal=29%
GO_LARGE_RIBOSOMAL_SUBUNIT	GO_LARGE_RIBOSOMAL_SUBUNIT		90	0.373952	0.918196	0.552063	0.893467	1	4150	tags=37%, list=24%, signal=48%
GO_IMPORT_INTO_CELL	GO_IMPORT_INTO_CELL		36	0.266877	0.91817	0.552063	0.892765	1	2573	tags=17%, list=15%, signal=19%
GO_POSITIVE_REGULATION_OF_PROTEIN_LOCALIZATION_TO_CELL_PERIPHERY	GO_POSITIVE_REGULATION_OF_PROTEIN_LOCALIZATION_TO_CELL_PERIPHERY		35	0.258448	0.918082	0.584016	0.892214	1	4352	tags=37%, list=25%, signal=49%
GO_CELLULAR_AMINO_ACID_BIOSYNTHETIC_PROCESS	GO_CELLULAR_AMINO_ACID_BIOSYNTHETIC_PROCESS		86	0.238796	0.917858	0.557312	0.891978	1	4418	tags=27%, list=25%, signal=35%
GO_RIBOSOME_BIOGENESIS	GO_RIBOSOME_BIOGENESIS		290	0.303942	0.916968	0.526419	0.893319	1	4189	tags=36%, list=24%, signal=47%
GO_NEGATIVE_REGULATION_OF_CALCIUM_ION_TRANSPORT	GO_NEGATIVE_REGULATION_OF_CALCIUM_ION_TRANSPORT		48	0.273427	0.916072	0.568085	0.894651	1	480	tags=8%, list=3%, signal=9%
GO_AMMONIUM_TRANSMEMBRANE_TRANSPORTER_ACTIVITY	GO_AMMONIUM_TRANSMEMBRANE_TRANSPORTER_ACTIVITY		26	0.277925	0.915604	0.557312	0.895061	1	2671	tags=15%, list=15%, signal=18%
GO_NUCLEAR_TRANSCRIBED_MRNA_CATABOLIC_PROCESS_NONSENSE_MEDIATED_DECAY	GO_NUCLEAR_TRANSCRIBED_MRNA_CATABOLIC_PROCESS_NONSENSE_MEDIATED_DECAY		117	0.333621	0.914999	0.536399	0.895757	1	4151	tags=33%, list=24%, signal=43%
GO_SMOOTH_MUSCLE_TISSUE_DEVELOPMENT	GO_SMOOTH_MUSCLE_TISSUE_DEVELOPMENT		18	0.335472	0.914674	0.556237	0.895772	1	3550	tags=28%, list=20%, signal=35%
GO_RNA_DESTABILIZATION	GO_RNA_DESTABILIZATION		15	0.317411	0.914462	0.56	0.895532	1	1916	tags=27%, list=11%, signal=30%
GO_REGULATION_OF_RELEASE_OF_SEQUESTERED_CALCIUM_ION_INTO_CYTOSOL_BY_SARCOPLASMIC_RETICULUM	GO_REGULATION_OF_RELEASE_OF_SEQUESTERED_CALCIUM_ION_INTO_CYTOSOL_BY_SARCOPLASMIC_RETICULUM		25	0.323788	0.914275	0.565306	0.895198	1	1731	tags=16%, list=10%, signal=18%
GO_LYSOPHOSPHOLIPASE_ACTIVITY	GO_LYSOPHOSPHOLIPASE_ACTIVITY		19	0.299435	0.91386	0.581109	0.895444	1	894	tags=16%, list=5%, signal=17%
GO_DSRNA_FRAGMENTATION	GO_DSRNA_FRAGMENTATION		18	0.308665	0.912465	0.574468	0.898024	1	1093	tags=17%, list=6%, signal=18%
GO_OLIGOSACCHARIDE_LIPID_INTERMEDIATE_BIOSYNTHETIC_PROCESS	GO_OLIGOSACCHARIDE_LIPID_INTERMEDIATE_BIOSYNTHETIC_PROCESS		20	0.336086	0.912051	0.564103	0.898256	1	3866	tags=45%, list=22%, signal=58%
GO_CELLULAR_COMPONENT_DISASSEMBLY_INVOLVED_IN_EXECUTION_PHASE_OF_APOPTOSIS	GO_CELLULAR_COMPONENT_DISASSEMBLY_INVOLVED_IN_EXECUTION_PHASE_OF_APOPTOSIS		41	0.246772	0.911428	0.597249	0.898916	1	4545	tags=39%, list=26%, signal=52%
GO_SKELETAL_MUSCLE_TISSUE_REGENERATION	GO_SKELETAL_MUSCLE_TISSUE_REGENERATION		21	0.289283	0.911147	0.573441	0.898811	1	2604	tags=24%, list=15%, signal=28%
GO_SPERM_PART	GO_SPERM_PART		112	0.204291	0.910997	0.646484	0.898414	1	4784	tags=28%, list=27%, signal=38%
GO_PHAGOCYTIC_VESICLE	GO_PHAGOCYTIC_VESICLE		84	0.249729	0.910884	0.550102	0.897927	1	3621	tags=25%, list=21%, signal=31%
GO_COFACTOR_BIOSYNTHETIC_PROCESS	GO_COFACTOR_BIOSYNTHETIC_PROCESS		151	0.264786	0.909071	0.559615	0.901396	1	2616	tags=23%, list=15%, signal=26%
GO_DNA_DEPENDENT_DNA_REPLICATION	GO_DNA_DEPENDENT_DNA_REPLICATION		89	0.311769	0.908479	0.538767	0.902008	1	4308	tags=44%, list=24%, signal=58%
GO_POSITIVE_REGULATION_OF_DNA_TEMPLATED_TRANSCRIPTION_INITIATION	GO_POSITIVE_REGULATION_OF_DNA_TEMPLATED_TRANSCRIPTION_INITIATION		24	0.275967	0.90734	0.60039	0.903895	1	3646	tags=33%, list=21%, signal=42%
GO_ANTIGEN_PROCESSING_AND_PRESENTATION	GO_ANTIGEN_PROCESSING_AND_PRESENTATION		204	0.238294	0.906206	0.550495	0.905814	1	3485	tags=22%, list=20%, signal=27%
GO_TELOMERE_MAINTENANCE_VIA_TELOMERE_LENGTHENING	GO_TELOMERE_MAINTENANCE_VIA_TELOMERE_LENGTHENING		24	0.28375	0.906133	0.596741	0.90524	1	3851	tags=33%, list=22%, signal=43%
GO_ANTERIOR_POSTERIOR_AXIS_SPECIFICATION	GO_ANTERIOR_POSTERIOR_AXIS_SPECIFICATION		46	0.23448	0.906014	0.615534	0.904753	1	3646	tags=22%, list=21%, signal=27%
GO_POSITIVE_REGULATION_OF_INTERLEUKIN_10_PRODUCTION	GO_POSITIVE_REGULATION_OF_INTERLEUKIN_10_PRODUCTION		28	0.290906	0.905992	0.57485	0.904065	1	1390	tags=14%, list=8%, signal=15%
GO_KETONE_BIOSYNTHETIC_PROCESS	GO_KETONE_BIOSYNTHETIC_PROCESS		21	0.326778	0.904344	0.560078	0.907205	1	4070	tags=33%, list=23%, signal=43%
GO_CELLULAR_RESPONSE_TO_OXYGEN_LEVELS	GO_CELLULAR_RESPONSE_TO_OXYGEN_LEVELS		136	0.209887	0.904079	0.598	0.907034	1	2700	tags=18%, list=15%, signal=21%
GO_CILIARY_PART	GO_CILIARY_PART		267	0.199219	0.903981	0.61753	0.906497	1	4772	tags=31%, list=27%, signal=42%
GO_POSITIVE_REGULATION_OF_SKELETAL_MUSCLE_TISSUE_DEVELOPMENT	GO_POSITIVE_REGULATION_OF_SKELETAL_MUSCLE_TISSUE_DEVELOPMENT		22	0.292891	0.903681	0.6	0.906492	1	4548	tags=32%, list=26%, signal=43%
GO_CEREBELLAR_CORTEX_FORMATION	GO_CEREBELLAR_CORTEX_FORMATION		22	0.312559	0.903049	0.589286	0.907216	1	3550	tags=27%, list=20%, signal=34%
GO_DNA_CATABOLIC_PROCESS_ENDONUCLEOLYTIC	GO_DNA_CATABOLIC_PROCESS_ENDONUCLEOLYTIC		18	0.290779	0.903033	0.605691	0.906513	1	1268	tags=17%, list=7%, signal=18%
GO_INOSITOL_PHOSPHATE_METABOLIC_PROCESS	GO_INOSITOL_PHOSPHATE_METABOLIC_PROCESS		55	0.235366	0.902471	0.597194	0.907072	1	3094	tags=22%, list=18%, signal=26%
GO_BRANCHED_CHAIN_AMINO_ACID_METABOLIC_PROCESS	GO_BRANCHED_CHAIN_AMINO_ACID_METABOLIC_PROCESS		23	0.317563	0.902397	0.558416	0.906476	1	3956	tags=43%, list=22%, signal=56%
GO_NIK_NF_KAPPAB_SIGNALING	GO_NIK_NF_KAPPAB_SIGNALING		82	0.279177	0.900371	0.546332	0.910358	1	1988	tags=21%, list=11%, signal=23%
GO_INTERMEDIATE_FILAMENT_BASED_PROCESS	GO_INTERMEDIATE_FILAMENT_BASED_PROCESS		40	0.303771	0.900258	0.599594	0.909858	1	2227	tags=13%, list=13%, signal=14%
GO_NEGATIVE_REGULATION_OF_PROTEIN_KINASE_B_SIGNALING	GO_NEGATIVE_REGULATION_OF_PROTEIN_KINASE_B_SIGNALING		32	0.263729	0.900086	0.60501	0.909524	1	1038	tags=16%, list=6%, signal=17%
GO_REGULATION_OF_SKELETAL_MUSCLE_TISSUE_DEVELOPMENT	GO_REGULATION_OF_SKELETAL_MUSCLE_TISSUE_DEVELOPMENT		43	0.264475	0.900009	0.588353	0.90898	1	3945	tags=26%, list=22%, signal=33%
GO_CENTROSOME_DUPLICATION	GO_CENTROSOME_DUPLICATION		31	0.316657	0.899914	0.584646	0.908452	1	5070	tags=55%, list=29%, signal=77%
GO_REGULATION_OF_STRIATED_MUSCLE_CELL_APOPTOTIC_PROCESS	GO_REGULATION_OF_STRIATED_MUSCLE_CELL_APOPTOTIC_PROCESS		21	0.275989	0.899681	0.591549	0.908265	1	3957	tags=24%, list=22%, signal=31%
GO_TUBULIN_BINDING	GO_TUBULIN_BINDING		253	0.19558	0.899439	0.606855	0.908054	1	3059	tags=20%, list=17%, signal=24%
GO_PROTEIN_KINASE_C_ACTIVITY	GO_PROTEIN_KINASE_C_ACTIVITY		16	0.306009	0.899002	0.571429	0.908335	1	1785	tags=19%, list=10%, signal=21%
GO_NCRNA_PROCESSING	GO_NCRNA_PROCESSING		361	0.285124	0.898965	0.535922	0.907681	1	4215	tags=37%, list=24%, signal=47%
GO_VIRION_ASSEMBLY	GO_VIRION_ASSEMBLY		36	0.281903	0.897772	0.593496	0.909691	1	2550	tags=33%, list=14%, signal=39%
GO_MYD88_DEPENDENT_TOLL_LIKE_RECEPTOR_SIGNALING_PATHWAY	GO_MYD88_DEPENDENT_TOLL_LIKE_RECEPTOR_SIGNALING_PATHWAY		32	0.284301	0.897175	0.54918	0.91031	1	4801	tags=44%, list=27%, signal=60%
GO_NEGATIVE_REGULATION_OF_POTASSIUM_ION_TRANSPORT	GO_NEGATIVE_REGULATION_OF_POTASSIUM_ION_TRANSPORT		30	0.275257	0.897087	0.58498	0.90978	1	4939	tags=33%, list=28%, signal=46%
GO_INORGANIC_ION_IMPORT_INTO_CELL	GO_INORGANIC_ION_IMPORT_INTO_CELL		15	0.327907	0.895862	0.578093	0.911887	1	2573	tags=27%, list=15%, signal=31%
GO_HYDROGEN_TRANSPORT	GO_HYDROGEN_TRANSPORT		127	0.252888	0.895455	0.589286	0.912119	1	3506	tags=24%, list=20%, signal=30%
GO_NEGATIVE_REGULATION_OF_MAP_KINASE_ACTIVITY	GO_NEGATIVE_REGULATION_OF_MAP_KINASE_ACTIVITY		72	0.229255	0.895314	0.591633	0.911712	1	1659	tags=15%, list=9%, signal=17%
GO_TELOMERIC_DNA_BINDING	GO_TELOMERIC_DNA_BINDING		28	0.276571	0.89482	0.575397	0.912161	1	3073	tags=25%, list=17%, signal=30%
GO_PROTEIN_TRANSMEMBRANE_TRANSPORT	GO_PROTEIN_TRANSMEMBRANE_TRANSPORT		49	0.28455	0.894698	0.577909	0.911712	1	3679	tags=35%, list=21%, signal=44%
GO_TRANSPORT_VESICLE_MEMBRANE	GO_TRANSPORT_VESICLE_MEMBRANE		143	0.230241	0.894126	0.599206	0.912255	1	3364	tags=20%, list=19%, signal=24%
GO_REGULATION_OF_MYELOID_CELL_DIFFERENTIATION	GO_REGULATION_OF_MYELOID_CELL_DIFFERENTIATION		172	0.22021	0.893993	0.616183	0.911805	1	3880	tags=28%, list=22%, signal=35%
GO_COENZYME_A_METABOLIC_PROCESS	GO_COENZYME_A_METABOLIC_PROCESS		17	0.324735	0.893527	0.602362	0.912168	1	1745	tags=29%, list=10%, signal=33%
GO_WIDE_PORE_CHANNEL_ACTIVITY	GO_WIDE_PORE_CHANNEL_ACTIVITY		19	0.306618	0.893461	0.598814	0.911586	1	598	tags=11%, list=3%, signal=11%
GO_GLUTAMINE_FAMILY_AMINO_ACID_BIOSYNTHETIC_PROCESS	GO_GLUTAMINE_FAMILY_AMINO_ACID_BIOSYNTHETIC_PROCESS		19	0.300652	0.893318	0.604839	0.911189	1	495	tags=11%, list=3%, signal=11%
GO_POSITIVE_REGULATION_OF_DEPHOSPHORYLATION	GO_POSITIVE_REGULATION_OF_DEPHOSPHORYLATION		44	0.246493	0.892908	0.600791	0.911388	1	1302	tags=14%, list=7%, signal=15%
GO_MICROTUBULE_BINDING	GO_MICROTUBULE_BINDING		189	0.201462	0.892761	0.613412	0.910942	1	3154	tags=21%, list=18%, signal=25%
GO_MOVEMENT_IN_ENVIRONMENT_OF_OTHER_ORGANISM_INVOLVED_IN_SYMBIOTIC_INTERACTION	GO_MOVEMENT_IN_ENVIRONMENT_OF_OTHER_ORGANISM_INVOLVED_IN_SYMBIOTIC_INTERACTION		79	0.241604	0.892401	0.592814	0.91104	1	3197	tags=20%, list=18%, signal=25%
GO_RESPONSE_TO_GONADOTROPIN	GO_RESPONSE_TO_GONADOTROPIN		26	0.263161	0.8921	0.61	0.910953	1	5114	tags=42%, list=29%, signal=59%
GO_HISTONE_H3_K4_METHYLATION	GO_HISTONE_H3_K4_METHYLATION		26	0.299145	0.891842	0.606426	0.910784	1	4534	tags=54%, list=26%, signal=72%
GO_CELLULAR_RESPONSE_TO_ABIOTIC_STIMULUS	GO_CELLULAR_RESPONSE_TO_ABIOTIC_STIMULUS		246	0.191244	0.891279	0.671875	0.911335	1	3646	tags=23%, list=21%, signal=28%
GO_NEURAL_PRECURSOR_CELL_PROLIFERATION	GO_NEURAL_PRECURSOR_CELL_PROLIFERATION		70	0.234535	0.891266	0.611789	0.91064	1	3586	tags=23%, list=20%, signal=29%
GO_SCAFFOLD_PROTEIN_BINDING	GO_SCAFFOLD_PROTEIN_BINDING		45	0.254363	0.890822	0.597633	0.910878	1	1334	tags=13%, list=8%, signal=14%
GO_QUATERNARY_AMMONIUM_GROUP_TRANSPORT	GO_QUATERNARY_AMMONIUM_GROUP_TRANSPORT		18	0.291208	0.890496	0.593186	0.910869	1	1470	tags=17%, list=8%, signal=18%
GO_GLYCOSYL_COMPOUND_METABOLIC_PROCESS	GO_GLYCOSYL_COMPOUND_METABOLIC_PROCESS		344	0.239097	0.890149	0.572254	0.910944	1	3558	tags=24%, list=20%, signal=29%
GO_ENDORIBONUCLEASE_ACTIVITY_PRODUCING_5_PHOSPHOMONOESTERS	GO_ENDORIBONUCLEASE_ACTIVITY_PRODUCING_5_PHOSPHOMONOESTERS		26	0.336293	0.890074	0.578337	0.910388	1	3127	tags=31%, list=18%, signal=37%
GO_DNA_HELICASE_ACTIVITY	GO_DNA_HELICASE_ACTIVITY		50	0.307846	0.88987	0.590038	0.910117	1	4106	tags=44%, list=23%, signal=57%
GO_POSITIVE_REGULATION_OF_CYCLIN_DEPENDENT_PROTEIN_KINASE_ACTIVITY	GO_POSITIVE_REGULATION_OF_CYCLIN_DEPENDENT_PROTEIN_KINASE_ACTIVITY		33	0.24065	0.889551	0.637652	0.910081	1	4323	tags=33%, list=24%, signal=44%
GO_RRNA_METABOLIC_PROCESS	GO_RRNA_METABOLIC_PROCESS		243	0.301832	0.889407	0.552684	0.909712	1	4189	tags=36%, list=24%, signal=46%
GO_RETINA_MORPHOGENESIS_IN_CAMERA_TYPE_EYE	GO_RETINA_MORPHOGENESIS_IN_CAMERA_TYPE_EYE		43	0.26192	0.889144	0.627049	0.90959	1	4166	tags=26%, list=24%, signal=33%
GO_CELLULAR_RESPIRATION	GO_CELLULAR_RESPIRATION		135	0.312583	0.887874	0.57451	0.911838	1	3672	tags=34%, list=21%, signal=43%
GO_PDZ_DOMAIN_BINDING	GO_PDZ_DOMAIN_BINDING		88	0.224147	0.886994	0.610998	0.913088	1	4568	tags=31%, list=26%, signal=41%
GO_CIS_TRANS_ISOMERASE_ACTIVITY	GO_CIS_TRANS_ISOMERASE_ACTIVITY		37	0.27054	0.88686	0.60479	0.912685	1	3312	tags=27%, list=19%, signal=33%
GO_CELL_PROLIFERATION_IN_FOREBRAIN	GO_CELL_PROLIFERATION_IN_FOREBRAIN		27	0.30164	0.886726	0.589899	0.912235	1	5506	tags=44%, list=31%, signal=64%
GO_GLYCEROLIPID_METABOLIC_PROCESS	GO_GLYCEROLIPID_METABOLIC_PROCESS		336	0.178089	0.883207	0.680639	0.919427	1	1884	tags=13%, list=11%, signal=15%
GO_IMMUNE_RESPONSE_REGULATING_CELL_SURFACE_RECEPTOR_SIGNALING_PATHWAY	GO_IMMUNE_RESPONSE_REGULATING_CELL_SURFACE_RECEPTOR_SIGNALING_PATHWAY		284	0.219357	0.882513	0.575697	0.920269	1	1988	tags=15%, list=11%, signal=17%
GO_NEGATIVE_REGULATION_OF_STEROID_METABOLIC_PROCESS	GO_NEGATIVE_REGULATION_OF_STEROID_METABOLIC_PROCESS		23	0.273235	0.882085	0.614481	0.920518	1	2369	tags=17%, list=13%, signal=20%
GO_PURINE_NUCLEOSIDE_MONOPHOSPHATE_BIOSYNTHETIC_PROCESS	GO_PURINE_NUCLEOSIDE_MONOPHOSPHATE_BIOSYNTHETIC_PROCESS		57	0.300564	0.881686	0.587891	0.920737	1	4157	tags=35%, list=24%, signal=46%
GO_FATTY_ACID_BIOSYNTHETIC_PROCESS	GO_FATTY_ACID_BIOSYNTHETIC_PROCESS		97	0.217092	0.881678	0.662602	0.920024	1	1637	tags=13%, list=9%, signal=15%
GO_MUSCLE_HYPERTROPHY	GO_MUSCLE_HYPERTROPHY		27	0.292817	0.880767	0.611336	0.921367	1	1898	tags=15%, list=11%, signal=17%
GO_ALPHA_AMINO_ACID_METABOLIC_PROCESS	GO_ALPHA_AMINO_ACID_METABOLIC_PROCESS		212	0.205597	0.879908	0.632887	0.922653	1	2645	tags=16%, list=15%, signal=19%
GO_REGULATION_OF_RYANODINE_SENSITIVE_CALCIUM_RELEASE_CHANNEL_ACTIVITY	GO_REGULATION_OF_RYANODINE_SENSITIVE_CALCIUM_RELEASE_CHANNEL_ACTIVITY		26	0.295893	0.879865	0.582485	0.922013	1	1731	tags=15%, list=10%, signal=17%
GO_REGULATION_OF_HEART_RATE_BY_CARDIAC_CONDUCTION	GO_REGULATION_OF_HEART_RATE_BY_CARDIAC_CONDUCTION		29	0.294506	0.879653	0.588595	0.921776	1	4098	tags=28%, list=23%, signal=36%
GO_PLASMA_MEMBRANE_ORGANIZATION	GO_PLASMA_MEMBRANE_ORGANIZATION		201	0.199799	0.879559	0.672098	0.921262	1	2563	tags=16%, list=15%, signal=19%
GO_REGULATION_OF_MUSCLE_HYPERTROPHY	GO_REGULATION_OF_MUSCLE_HYPERTROPHY		36	0.262414	0.879171	0.616601	0.921449	1	2604	tags=22%, list=15%, signal=26%
GO_GMP_METABOLIC_PROCESS	GO_GMP_METABOLIC_PROCESS		20	0.278353	0.878633	0.626204	0.92191	1	2453	tags=20%, list=14%, signal=23%
GO_MITOCHONDRIAL_MEMBRANE_PART	GO_MITOCHONDRIAL_MEMBRANE_PART		155	0.322599	0.878567	0.59519	0.921338	1	3805	tags=35%, list=22%, signal=44%
GO_RESPONSE_TO_TRANSITION_METAL_NANOPARTICLE	GO_RESPONSE_TO_TRANSITION_METAL_NANOPARTICLE		141	0.210588	0.877275	0.641075	0.923537	1	3300	tags=19%, list=19%, signal=23%
GO_T_CELL_RECEPTOR_SIGNALING_PATHWAY	GO_T_CELL_RECEPTOR_SIGNALING_PATHWAY		138	0.237665	0.876954	0.597194	0.923559	1	1988	tags=17%, list=11%, signal=19%
GO_MULTI_ORGANISM_BEHAVIOR	GO_MULTI_ORGANISM_BEHAVIOR		69	0.228708	0.876929	0.628392	0.922886	1	1311	tags=13%, list=7%, signal=14%
GO_REGULATION_OF_CARDIAC_MUSCLE_CONTRACTION_BY_CALCIUM_ION_SIGNALING	GO_REGULATION_OF_CARDIAC_MUSCLE_CONTRACTION_BY_CALCIUM_ION_SIGNALING		23	0.301364	0.876367	0.605108	0.923483	1	1834	tags=17%, list=10%, signal=19%
GO_CELLULAR_KETONE_METABOLIC_PROCESS	GO_CELLULAR_KETONE_METABOLIC_PROCESS		61	0.250596	0.87591	0.616016	0.923721	1	2511	tags=16%, list=14%, signal=19%
GO_INNER_MITOCHONDRIAL_MEMBRANE_PROTEIN_COMPLEX	GO_INNER_MITOCHONDRIAL_MEMBRANE_PROTEIN_COMPLEX		99	0.360638	0.875748	0.589391	0.923359	1	3805	tags=38%, list=22%, signal=49%
GO_TRNA_PROCESSING	GO_TRNA_PROCESSING		106	0.294598	0.875606	0.562874	0.922963	1	2807	tags=31%, list=16%, signal=37%
GO_MULTI_ORGANISM_MEMBRANE_ORGANIZATION	GO_MULTI_ORGANISM_MEMBRANE_ORGANIZATION		29	0.276127	0.87536	0.595618	0.922751	1	2550	tags=31%, list=14%, signal=36%
GO_POSITIVE_REGULATION_OF_FIBROBLAST_PROLIFERATION	GO_POSITIVE_REGULATION_OF_FIBROBLAST_PROLIFERATION		52	0.23556	0.874665	0.636364	0.923612	1	1843	tags=15%, list=10%, signal=17%
GO_ALDITOL_PHOSPHATE_METABOLIC_PROCESS	GO_ALDITOL_PHOSPHATE_METABOLIC_PROCESS		33	0.244969	0.874569	0.624481	0.923117	1	1700	tags=15%, list=10%, signal=17%
GO_REGULATION_OF_CELL_FATE_COMMITMENT	GO_REGULATION_OF_CELL_FATE_COMMITMENT		26	0.263595	0.874546	0.651899	0.922442	1	1926	tags=15%, list=11%, signal=17%
GO_PROTEIN_SELF_ASSOCIATION	GO_PROTEIN_SELF_ASSOCIATION		41	0.238998	0.874331	0.676923	0.922213	1	3731	tags=27%, list=21%, signal=34%
GO_RAC_PROTEIN_SIGNAL_TRANSDUCTION	GO_RAC_PROTEIN_SIGNAL_TRANSDUCTION		18	0.295256	0.874328	0.632207	0.921502	1	3540	tags=33%, list=20%, signal=42%
GO_NEGATIVE_REGULATION_OF_OSTEOCLAST_DIFFERENTIATION	GO_NEGATIVE_REGULATION_OF_OSTEOCLAST_DIFFERENTIATION		23	0.312558	0.873998	0.609705	0.921517	1	3646	tags=30%, list=21%, signal=38%
GO_NUCLEAR_EXOSOME_RNASE_COMPLEX_	GO_NUCLEAR_EXOSOME_RNASE_COMPLEX_		15	0.365088	0.87366	0.604	0.921544	1	2089	tags=27%, list=12%, signal=30%
GO_INTRINSIC_APOPTOTIC_SIGNALING_PATHWAY_IN_RESPONSE_TO_DNA_DAMAGE_BY_P53_CLASS_MEDIATOR	GO_INTRINSIC_APOPTOTIC_SIGNALING_PATHWAY_IN_RESPONSE_TO_DNA_DAMAGE_BY_P53_CLASS_MEDIATOR		29	0.26099	0.87304	0.624016	0.922262	1	2376	tags=24%, list=13%, signal=28%
GO_PROTON_TRANSPORTING_V_TYPE_ATPASE_COMPLEX	GO_PROTON_TRANSPORTING_V_TYPE_ATPASE_COMPLEX		22	0.285588	0.872759	0.623656	0.922185	1	3225	tags=32%, list=18%, signal=39%
GO_MRNA_SPLICE_SITE_SELECTION	GO_MRNA_SPLICE_SITE_SELECTION		26	0.299997	0.872714	0.610236	0.921572	1	3519	tags=35%, list=20%, signal=43%
GO_RESPONSE_TO_AMPHETAMINE	GO_RESPONSE_TO_AMPHETAMINE		29	0.257418	0.871957	0.661568	0.922627	1	2647	tags=17%, list=15%, signal=20%
GO_AXIS_SPECIFICATION	GO_AXIS_SPECIFICATION		88	0.199201	0.870908	0.740234	0.924322	1	3124	tags=19%, list=18%, signal=23%
GO_REGULATION_OF_NF_KAPPAB_IMPORT_INTO_NUCLEUS	GO_REGULATION_OF_NF_KAPPAB_IMPORT_INTO_NUCLEUS		47	0.251283	0.87007	0.616935	0.92546	1	3546	tags=26%, list=20%, signal=32%
GO_POSITIVE_REGULATION_OF_SMALL_GTPASE_MEDIATED_SIGNAL_TRANSDUCTION	GO_POSITIVE_REGULATION_OF_SMALL_GTPASE_MEDIATED_SIGNAL_TRANSDUCTION		36	0.289456	0.869672	0.621564	0.925637	1	2849	tags=19%, list=16%, signal=23%
GO_PH_REDUCTION	GO_PH_REDUCTION		37	0.256265	0.869599	0.608696	0.925078	1	3225	tags=24%, list=18%, signal=30%
GO_POSITIVE_REGULATION_OF_ORGAN_GROWTH	GO_POSITIVE_REGULATION_OF_ORGAN_GROWTH		35	0.248793	0.869509	0.659794	0.924563	1	4287	tags=31%, list=24%, signal=41%
GO_ATPASE_ACTIVITY_COUPLED_TO_MOVEMENT_OF_SUBSTANCES	GO_ATPASE_ACTIVITY_COUPLED_TO_MOVEMENT_OF_SUBSTANCES		118	0.206272	0.869401	0.68008	0.924083	1	3225	tags=19%, list=18%, signal=24%
GO_CERAMIDE_METABOLIC_PROCESS	GO_CERAMIDE_METABOLIC_PROCESS		70	0.219045	0.869394	0.640082	0.923388	1	2625	tags=17%, list=15%, signal=20%
GO_RIBONUCLEOTIDE_CATABOLIC_PROCESS	GO_RIBONUCLEOTIDE_CATABOLIC_PROCESS		28	0.259353	0.869365	0.629482	0.92274	1	4966	tags=43%, list=28%, signal=60%
GO_POSITIVE_REGULATION_OF_VASCULAR_ENDOTHELIAL_GROWTH_FACTOR_PRODUCTION	GO_POSITIVE_REGULATION_OF_VASCULAR_ENDOTHELIAL_GROWTH_FACTOR_PRODUCTION		26	0.301945	0.868605	0.617357	0.923735	1	5524	tags=42%, list=31%, signal=61%
GO_REGULATION_OF_CARDIAC_MUSCLE_CELL_PROLIFERATION	GO_REGULATION_OF_CARDIAC_MUSCLE_CELL_PROLIFERATION		28	0.272138	0.868598	0.622	0.923044	1	1762	tags=14%, list=10%, signal=16%
GO_CELLULAR_RESPONSE_TO_EXTERNAL_STIMULUS	GO_CELLULAR_RESPONSE_TO_EXTERNAL_STIMULUS		253	0.191537	0.868433	0.677419	0.922699	1	2712	tags=18%, list=15%, signal=21%
GO_HSP70_PROTEIN_BINDING	GO_HSP70_PROTEIN_BINDING		28	0.257653	0.867367	0.639535	0.924359	1	1670	tags=18%, list=9%, signal=20%
GO_AMINO_ACID_BINDING	GO_AMINO_ACID_BINDING		102	0.196865	0.866822	0.7375	0.924848	1	4099	tags=23%, list=23%, signal=29%
GO_PHOSPHOLIPID_BINDING	GO_PHOSPHOLIPID_BINDING		339	0.187745	0.866714	0.699387	0.924393	1	4296	tags=25%, list=24%, signal=32%
GO_SPLICEOSOMAL_COMPLEX_ASSEMBLY	GO_SPLICEOSOMAL_COMPLEX_ASSEMBLY		52	0.277985	0.866039	0.60404	0.925181	1	4439	tags=42%, list=25%, signal=56%
GO_CELLULAR_RESPONSE_TO_DSRNA	GO_CELLULAR_RESPONSE_TO_DSRNA		33	0.247941	0.865679	0.669231	0.925283	1	1805	tags=15%, list=10%, signal=17%
GO_LAMELLIPODIUM_ORGANIZATION	GO_LAMELLIPODIUM_ORGANIZATION		34	0.246673	0.863346	0.668687	0.929671	1	1392	tags=12%, list=8%, signal=13%
GO_SPHINGOLIPID_METABOLIC_PROCESS	GO_SPHINGOLIPID_METABOLIC_PROCESS		127	0.211542	0.863281	0.655311	0.929113	1	2625	tags=18%, list=15%, signal=21%
GO_INTRACELLULAR_LIPID_TRANSPORT	GO_INTRACELLULAR_LIPID_TRANSPORT		20	0.27615	0.863217	0.633333	0.928532	1	2681	tags=25%, list=15%, signal=29%
GO_POSITIVE_REGULATION_OF_NITRIC_OXIDE_SYNTHASE_ACTIVITY	GO_POSITIVE_REGULATION_OF_NITRIC_OXIDE_SYNTHASE_ACTIVITY		21	0.277058	0.863098	0.6893	0.928097	1	1952	tags=19%, list=11%, signal=21%
GO_ENDOSOME_LUMEN	GO_ENDOSOME_LUMEN		22	0.293398	0.863048	0.644401	0.927507	1	3857	tags=32%, list=22%, signal=41%
GO_PROTEIN_SERINE_THREONINE_KINASE_ACTIVATOR_ACTIVITY	GO_PROTEIN_SERINE_THREONINE_KINASE_ACTIVATOR_ACTIVITY		19	0.276205	0.862964	0.636015	0.926973	1	4066	tags=37%, list=23%, signal=48%
GO_NEGATIVE_REGULATION_OF_SMOOTH_MUSCLE_CONTRACTION	GO_NEGATIVE_REGULATION_OF_SMOOTH_MUSCLE_CONTRACTION		15	0.322405	0.862925	0.651899	0.926358	1	7484	tags=60%, list=42%, signal=104%
GO_ATP_BIOSYNTHETIC_PROCESS	GO_ATP_BIOSYNTHETIC_PROCESS		31	0.339206	0.862488	0.59841	0.926651	1	4157	tags=35%, list=24%, signal=46%
GO_HETEROCHROMATIN	GO_HETEROCHROMATIN		64	0.231326	0.862119	0.675944	0.926757	1	3732	tags=31%, list=21%, signal=39%
GO_ENERGY_COUPLED_PROTON_TRANSPORT_DOWN_ELECTROCHEMICAL_GRADIENT	GO_ENERGY_COUPLED_PROTON_TRANSPORT_DOWN_ELECTROCHEMICAL_GRADIENT		23	0.375831	0.862109	0.626482	0.926079	1	4622	tags=43%, list=26%, signal=59%
GO_BETA_CATENIN_TCF_COMPLEX_ASSEMBLY	GO_BETA_CATENIN_TCF_COMPLEX_ASSEMBLY		41	0.274529	0.861004	0.627219	0.927782	1	4415	tags=44%, list=25%, signal=58%
GO_ANTIGEN_PROCESSING_AND_PRESENTATION_OF_PEPTIDE_ANTIGEN	GO_ANTIGEN_PROCESSING_AND_PRESENTATION_OF_PEPTIDE_ANTIGEN		168	0.230801	0.86064	0.604247	0.927864	1	3485	tags=22%, list=20%, signal=27%
GO_REGULATION_OF_MEIOTIC_CELL_CYCLE	GO_REGULATION_OF_MEIOTIC_CELL_CYCLE		36	0.228336	0.859943	0.705021	0.928653	1	2426	tags=17%, list=14%, signal=19%
GO_SPERM_FLAGELLUM	GO_SPERM_FLAGELLUM		47	0.229491	0.859111	0.681467	0.92979	1	5378	tags=38%, list=30%, signal=55%
GO_NEGATIVE_REGULATION_OF_DNA_BINDING	GO_NEGATIVE_REGULATION_OF_DNA_BINDING		46	0.220875	0.859002	0.703252	0.929317	1	3947	tags=26%, list=22%, signal=34%
GO_TRANSMEMBRANE_RECEPTOR_PROTEIN_SERINE_THREONINE_KINASE_ACTIVITY	GO_TRANSMEMBRANE_RECEPTOR_PROTEIN_SERINE_THREONINE_KINASE_ACTIVITY		16	0.318799	0.858733	0.62173	0.929164	1	4545	tags=44%, list=26%, signal=59%
GO_PROTEIN_EXPORT_FROM_NUCLEUS	GO_PROTEIN_EXPORT_FROM_NUCLEUS		29	0.25509	0.857975	0.637795	0.930127	1	3581	tags=34%, list=20%, signal=43%
GO_FC_GAMMA_RECEPTOR_SIGNALING_PATHWAY	GO_FC_GAMMA_RECEPTOR_SIGNALING_PATHWAY		73	0.226359	0.857576	0.625755	0.930281	1	2463	tags=19%, list=14%, signal=22%
GO_REGULATION_OF_NEUROLOGICAL_SYSTEM_PROCESS	GO_REGULATION_OF_NEUROLOGICAL_SYSTEM_PROCESS		59	0.250906	0.857411	0.630342	0.929915	1	1649	tags=10%, list=9%, signal=11%
GO_CYTOCHROME_COMPLEX_ASSEMBLY	GO_CYTOCHROME_COMPLEX_ASSEMBLY		15	0.363006	0.85695	0.633858	0.930235	1	1736	tags=27%, list=10%, signal=30%
GO_REGULATION_OF_CLATHRIN_MEDIATED_ENDOCYTOSIS	GO_REGULATION_OF_CLATHRIN_MEDIATED_ENDOCYTOSIS		16	0.299975	0.85563	0.621849	0.93243	1	1599	tags=13%, list=9%, signal=14%
GO_MEMBRANE_PROTEIN_PROTEOLYSIS	GO_MEMBRANE_PROTEIN_PROTEOLYSIS		34	0.23972	0.855139	0.666667	0.932806	1	4734	tags=38%, list=27%, signal=52%
GO_REGULATION_OF_GENE_EXPRESSION_BY_GENETIC_IMPRINTING	GO_REGULATION_OF_GENE_EXPRESSION_BY_GENETIC_IMPRINTING		15	0.298325	0.855112	0.662028	0.932171	1	3455	tags=33%, list=20%, signal=41%
GO_RESPONSE_TO_REACTIVE_OXYGEN_SPECIES	GO_RESPONSE_TO_REACTIVE_OXYGEN_SPECIES		185	0.194157	0.854463	0.673956	0.932878	1	2790	tags=18%, list=16%, signal=22%
GO_THIOESTER_BIOSYNTHETIC_PROCESS	GO_THIOESTER_BIOSYNTHETIC_PROCESS		46	0.250839	0.854421	0.642586	0.93226	1	1616	tags=17%, list=9%, signal=19%
GO_POSITIVE_REGULATION_OF_RECEPTOR_INTERNALIZATION	GO_POSITIVE_REGULATION_OF_RECEPTOR_INTERNALIZATION		23	0.263515	0.852834	0.677824	0.934953	1	1901	tags=17%, list=11%, signal=19%
GO_ORGAN_GROWTH	GO_ORGAN_GROWTH		64	0.25334	0.85202	0.645875	0.936011	1	2111	tags=16%, list=12%, signal=18%
GO_REGULATION_OF_POTASSIUM_ION_TRANSPORT	GO_REGULATION_OF_POTASSIUM_ION_TRANSPORT		81	0.227001	0.851871	0.632114	0.935654	1	4356	tags=27%, list=25%, signal=36%
GO_NEGATIVE_REGULATION_OF_CATION_TRANSMEMBRANE_TRANSPORT	GO_NEGATIVE_REGULATION_OF_CATION_TRANSMEMBRANE_TRANSPORT		57	0.231197	0.85177	0.669371	0.935171	1	4175	tags=23%, list=24%, signal=30%
GO_REGULATION_OF_INTERFERON_BETA_PRODUCTION	GO_REGULATION_OF_INTERFERON_BETA_PRODUCTION		43	0.237459	0.850886	0.680498	0.936384	1	3277	tags=28%, list=19%, signal=34%
GO_CELLULAR_RESPONSE_TO_STEROID_HORMONE_STIMULUS	GO_CELLULAR_RESPONSE_TO_STEROID_HORMONE_STIMULUS		201	0.181582	0.850666	0.765657	0.936139	1	3646	tags=20%, list=21%, signal=25%
GO_CILIARY_PLASM	GO_CILIARY_PLASM		71	0.241892	0.850527	0.664683	0.935738	1	5804	tags=44%, list=33%, signal=65%
GO_DEOXYRIBONUCLEOSIDE_TRIPHOSPHATE_METABOLIC_PROCESS	GO_DEOXYRIBONUCLEOSIDE_TRIPHOSPHATE_METABOLIC_PROCESS		16	0.338056	0.849993	0.624506	0.936175	1	4037	tags=44%, list=23%, signal=57%
GO_RNA_SPLICING_VIA_ENDONUCLEOLYTIC_CLEAVAGE_AND_LIGATION	GO_RNA_SPLICING_VIA_ENDONUCLEOLYTIC_CLEAVAGE_AND_LIGATION		15	0.323584	0.849832	0.627863	0.935821	1	2277	tags=33%, list=13%, signal=38%
GO_ERBB2_SIGNALING_PATHWAY	GO_ERBB2_SIGNALING_PATHWAY		38	0.229894	0.849077	0.696466	0.936744	1	2849	tags=24%, list=16%, signal=28%
GO_GUANOSINE_CONTAINING_COMPOUND_METABOLIC_PROCESS	GO_GUANOSINE_CONTAINING_COMPOUND_METABOLIC_PROCESS		44	0.232006	0.848595	0.680934	0.93712	1	2870	tags=20%, list=16%, signal=24%
GO_LYSOPHOSPHOLIPID_ACYLTRANSFERASE_ACTIVITY	GO_LYSOPHOSPHOLIPID_ACYLTRANSFERASE_ACTIVITY		17	0.285743	0.848342	0.662626	0.936968	1	3240	tags=35%, list=18%, signal=43%
GO_REGULATION_OF_STEROID_BIOSYNTHETIC_PROCESS	GO_REGULATION_OF_STEROID_BIOSYNTHETIC_PROCESS		48	0.226386	0.84831	0.71371	0.936344	1	1581	tags=13%, list=9%, signal=14%
GO_ENDOSOME_TO_LYSOSOME_TRANSPORT	GO_ENDOSOME_TO_LYSOSOME_TRANSPORT		40	0.228279	0.847996	0.704918	0.93634	1	4268	tags=38%, list=24%, signal=49%
GO_CYTOKINE_PRODUCTION	GO_CYTOKINE_PRODUCTION		114	0.239237	0.84733	0.614141	0.937098	1	3310	tags=19%, list=19%, signal=24%
GO_REGULATION_OF_AMINO_ACID_TRANSPORT	GO_REGULATION_OF_AMINO_ACID_TRANSPORT		23	0.283858	0.847055	0.648148	0.937015	1	3967	tags=22%, list=22%, signal=28%
GO_PHOSPHATIDYLSERINE_BINDING	GO_PHOSPHATIDYLSERINE_BINDING		32	0.250679	0.846782	0.697286	0.936905	1	1828	tags=13%, list=10%, signal=14%
GO_NAD_ADP_RIBOSYLTRANSFERASE_ACTIVITY	GO_NAD_ADP_RIBOSYLTRANSFERASE_ACTIVITY		26	0.255396	0.846527	0.672131	0.936775	1	2481	tags=23%, list=14%, signal=27%
GO_STRUCTURAL_CONSTITUENT_OF_RIBOSOME	GO_STRUCTURAL_CONSTITUENT_OF_RIBOSOME		199	0.317393	0.846368	0.609037	0.936453	1	4190	tags=35%, list=24%, signal=46%
GO_PROTEIN_TARGETING_TO_MITOCHONDRION	GO_PROTEIN_TARGETING_TO_MITOCHONDRION		46	0.308721	0.846321	0.604	0.935871	1	3301	tags=30%, list=19%, signal=37%
GO_NEGATIVE_REGULATION_OF_B_CELL_ACTIVATION	GO_NEGATIVE_REGULATION_OF_B_CELL_ACTIVATION		30	0.292529	0.845546	0.620123	0.936878	1	955	tags=13%, list=5%, signal=14%
GO_EPITHELIAL_CILIUM_MOVEMENT	GO_EPITHELIAL_CILIUM_MOVEMENT		17	0.302942	0.845457	0.639847	0.93639	1	5200	tags=47%, list=29%, signal=67%
GO_MANNOSE_BINDING	GO_MANNOSE_BINDING		17	0.290621	0.845412	0.707469	0.935795	1	6253	tags=47%, list=35%, signal=73%
GO_POTASSIUM_CHANNEL_REGULATOR_ACTIVITY	GO_POTASSIUM_CHANNEL_REGULATOR_ACTIVITY		44	0.235156	0.844945	0.676056	0.936089	1	3413	tags=20%, list=19%, signal=25%
GO_CENTRIOLE	GO_CENTRIOLE		91	0.226923	0.84357	0.631164	0.938421	1	3983	tags=34%, list=23%, signal=44%
GO_REGULATION_OF_ICOSANOID_SECRETION	GO_REGULATION_OF_ICOSANOID_SECRETION		20	0.269758	0.843037	0.666667	0.938881	1	735	tags=10%, list=4%, signal=10%
GO_GTP_METABOLIC_PROCESS	GO_GTP_METABOLIC_PROCESS		21	0.267378	0.842892	0.645038	0.938499	1	2870	tags=24%, list=16%, signal=28%
GO_RESPONSE_TO_LITHIUM_ION	GO_RESPONSE_TO_LITHIUM_ION		25	0.25984	0.842887	0.718	0.937817	1	3646	tags=32%, list=21%, signal=40%
GO_GPI_ANCHOR_METABOLIC_PROCESS	GO_GPI_ANCHOR_METABOLIC_PROCESS		32	0.265753	0.842444	0.636364	0.938069	1	3812	tags=38%, list=22%, signal=48%
GO_GENERATION_OF_PRECURSOR_METABOLITES_AND_ENERGY	GO_GENERATION_OF_PRECURSOR_METABOLITES_AND_ENERGY		269	0.235443	0.84242	0.621094	0.937421	1	3273	tags=25%, list=19%, signal=30%
GO_RESPIRATORY_GASEOUS_EXCHANGE	GO_RESPIRATORY_GASEOUS_EXCHANGE		47	0.250764	0.840659	0.719665	0.940438	1	1499	tags=15%, list=8%, signal=16%
GO_ORGAN_OR_TISSUE_SPECIFIC_IMMUNE_RESPONSE	GO_ORGAN_OR_TISSUE_SPECIFIC_IMMUNE_RESPONSE		26	0.296625	0.840414	0.604374	0.940271	1	2762	tags=23%, list=16%, signal=27%
GO_PURINE_CONTAINING_COMPOUND_METABOLIC_PROCESS	GO_PURINE_CONTAINING_COMPOUND_METABOLIC_PROCESS		372	0.210481	0.840146	0.619883	0.9402	1	4622	tags=29%, list=26%, signal=38%
GO_BETA_TUBULIN_BINDING	GO_BETA_TUBULIN_BINDING		35	0.231843	0.840132	0.70935	0.939542	1	3059	tags=23%, list=17%, signal=28%
GO_PEPTIDASE_ACTIVATOR_ACTIVITY	GO_PEPTIDASE_ACTIVATOR_ACTIVITY		36	0.237999	0.840111	0.68906	0.938911	1	4022	tags=33%, list=23%, signal=43%
GO_ALDEHYDE_DEHYDROGENASE_NAD_ACTIVITY	GO_ALDEHYDE_DEHYDROGENASE_NAD_ACTIVITY		19	0.288254	0.839931	0.652778	0.938633	1	4242	tags=26%, list=24%, signal=35%
GO_REGULATION_OF_ACTIN_FILAMENT_DEPOLYMERIZATION	GO_REGULATION_OF_ACTIN_FILAMENT_DEPOLYMERIZATION		41	0.2477	0.83935	0.672131	0.93925	1	2750	tags=20%, list=16%, signal=23%
GO_T_CELL_MEDIATED_IMMUNITY	GO_T_CELL_MEDIATED_IMMUNITY		27	0.289427	0.838895	0.630832	0.939508	1	606	tags=11%, list=3%, signal=11%
GO_ONE_CARBON_METABOLIC_PROCESS	GO_ONE_CARBON_METABOLIC_PROCESS		35	0.256918	0.83883	0.630885	0.938969	1	3432	tags=20%, list=19%, signal=25%
GO_NEGATIVE_REGULATION_OF_PROTEIN_MATURATION	GO_NEGATIVE_REGULATION_OF_PROTEIN_MATURATION		33	0.252743	0.838588	0.658436	0.938803	1	1400	tags=12%, list=8%, signal=13%
GO_RHYTHMIC_PROCESS	GO_RHYTHMIC_PROCESS		273	0.178528	0.838507	0.793241	0.938303	1	3946	tags=22%, list=22%, signal=28%
GO_STRIATED_MUSCLE_CELL_DIFFERENTIATION	GO_STRIATED_MUSCLE_CELL_DIFFERENTIATION		155	0.213374	0.838444	0.637624	0.937754	1	1838	tags=12%, list=10%, signal=14%
GO_REGULATION_OF_LIPID_BIOSYNTHETIC_PROCESS	GO_REGULATION_OF_LIPID_BIOSYNTHETIC_PROCESS		119	0.192913	0.838391	0.727273	0.937174	1	1582	tags=12%, list=9%, signal=13%
GO_PHOSPHATIDYLINOSITOL_3_KINASE_SIGNALING	GO_PHOSPHATIDYLINOSITOL_3_KINASE_SIGNALING		22	0.280709	0.837922	0.661795	0.937542	1	3279	tags=23%, list=19%, signal=28%
GO_MRNA_CIS_SPLICING_VIA_SPLICEOSOME	GO_MRNA_CIS_SPLICING_VIA_SPLICEOSOME		17	0.311899	0.8377	0.65873	0.93736	1	3720	tags=41%, list=21%, signal=52%
GO_OTIC_VESICLE_DEVELOPMENT	GO_OTIC_VESICLE_DEVELOPMENT		15	0.308588	0.837141	0.707566	0.937844	1	6079	tags=47%, list=34%, signal=71%
GO_NEGATIVE_REGULATION_OF_TRANSCRIPTION_REGULATORY_REGION_DNA_BINDING	GO_NEGATIVE_REGULATION_OF_TRANSCRIPTION_REGULATORY_REGION_DNA_BINDING		17	0.278088	0.837097	0.705051	0.937258	1	3368	tags=18%, list=19%, signal=22%
GO_COFACTOR_METABOLIC_PROCESS	GO_COFACTOR_METABOLIC_PROCESS		311	0.224501	0.837025	0.667976	0.936759	1	2682	tags=19%, list=15%, signal=22%
GO_AMMONIUM_TRANSMEMBRANE_TRANSPORT	GO_AMMONIUM_TRANSMEMBRANE_TRANSPORT		24	0.25554	0.836194	0.689723	0.937813	1	1451	tags=13%, list=8%, signal=14%
GO_RIBOSOMAL_LARGE_SUBUNIT_BIOGENESIS	GO_RIBOSOMAL_LARGE_SUBUNIT_BIOGENESIS		48	0.315144	0.83604	0.611765	0.937466	1	2940	tags=33%, list=17%, signal=40%
GO_HOMOLOGOUS_CHROMOSOME_SEGREGATION	GO_HOMOLOGOUS_CHROMOSOME_SEGREGATION		35	0.250384	0.835794	0.6875	0.937302	1	5279	tags=37%, list=30%, signal=53%
GO_RNA_POLYMERASE_II_ACTIVATING_TRANSCRIPTION_FACTOR_BINDING	GO_RNA_POLYMERASE_II_ACTIVATING_TRANSCRIPTION_FACTOR_BINDING		36	0.250313	0.835476	0.674134	0.937281	1	1014	tags=11%, list=6%, signal=12%
GO_HIPPOCAMPUS_DEVELOPMENT	GO_HIPPOCAMPUS_DEVELOPMENT		70	0.219114	0.835347	0.73499	0.936871	1	5193	tags=33%, list=29%, signal=46%
GO_CYTOSOLIC_SMALL_RIBOSOMAL_SUBUNIT	GO_CYTOSOLIC_SMALL_RIBOSOMAL_SUBUNIT		42	0.365389	0.835193	0.652259	0.936574	1	5884	tags=55%, list=33%, signal=82%
GO_EUKARYOTIC_TRANSLATION_INITIATION_FACTOR_3_COMPLEX	GO_EUKARYOTIC_TRANSLATION_INITIATION_FACTOR_3_COMPLEX		16	0.341025	0.834831	0.635081	0.936691	1	4994	tags=50%, list=28%, signal=70%
GO_NUCLEOBASE_METABOLIC_PROCESS	GO_NUCLEOBASE_METABOLIC_PROCESS		37	0.258294	0.834773	0.665406	0.93615	1	5754	tags=54%, list=33%, signal=80%
GO_ORGANELLE_DISASSEMBLY	GO_ORGANELLE_DISASSEMBLY		171	0.177891	0.834338	0.79802	0.936347	1	4637	tags=31%, list=26%, signal=42%
GO_TELOMERASE_HOLOENZYME_COMPLEX	GO_TELOMERASE_HOLOENZYME_COMPLEX		19	0.300106	0.834091	0.668593	0.936209	1	3120	tags=26%, list=18%, signal=32%
GO_NEGATIVE_REGULATION_OF_T_CELL_RECEPTOR_SIGNALING_PATHWAY	GO_NEGATIVE_REGULATION_OF_T_CELL_RECEPTOR_SIGNALING_PATHWAY		16	0.280923	0.832838	0.681633	0.938171	1	540	tags=13%, list=3%, signal=13%
GO_PROTEASOME_COMPLEX	GO_PROTEASOME_COMPLEX		73	0.271802	0.831813	0.608187	0.93965	1	1988	tags=22%, list=11%, signal=25%
GO_ELECTRON_TRANSPORT_CHAIN	GO_ELECTRON_TRANSPORT_CHAIN		91	0.31809	0.831631	0.623016	0.939395	1	3805	tags=36%, list=22%, signal=46%
GO_CORE_PROMOTER_BINDING	GO_CORE_PROMOTER_BINDING		144	0.194293	0.831566	0.732422	0.938859	1	3599	tags=24%, list=20%, signal=29%
GO_PURINE_CONTAINING_COMPOUND_BIOSYNTHETIC_PROCESS	GO_PURINE_CONTAINING_COMPOUND_BIOSYNTHETIC_PROCESS		129	0.215441	0.831122	0.660853	0.939158	1	4261	tags=29%, list=24%, signal=38%
GO_STRUCTURE_SPECIFIC_DNA_BINDING	GO_STRUCTURE_SPECIFIC_DNA_BINDING		113	0.21423	0.830057	0.698819	0.94075	1	3973	tags=31%, list=22%, signal=40%
GO_GAMMA_TUBULIN_BINDING	GO_GAMMA_TUBULIN_BINDING		23	0.243224	0.829973	0.742857	0.940259	1	1329	tags=17%, list=8%, signal=19%
GO_U2_TYPE_SPLICEOSOMAL_COMPLEX	GO_U2_TYPE_SPLICEOSOMAL_COMPLEX		29	0.274273	0.82975	0.656189	0.940048	1	2056	tags=24%, list=12%, signal=27%
GO_HISTONE_DEUBIQUITINATION	GO_HISTONE_DEUBIQUITINATION		21	0.272384	0.829411	0.660118	0.940096	1	1231	tags=19%, list=7%, signal=20%
GO_NEUTROPHIL_MEDIATED_IMMUNITY	GO_NEUTROPHIL_MEDIATED_IMMUNITY		21	0.274256	0.828372	0.680808	0.941581	1	4319	tags=29%, list=24%, signal=38%
GO_FEMALE_SEX_DIFFERENTIATION	GO_FEMALE_SEX_DIFFERENTIATION		107	0.194756	0.827093	0.734475	0.943592	1	2568	tags=14%, list=15%, signal=16%
GO_RNA_POLYMERASE_II_TRANSCRIPTION_FACTOR_BINDING	GO_RNA_POLYMERASE_II_TRANSCRIPTION_FACTOR_BINDING		103	0.199245	0.826373	0.760081	0.944375	1	3023	tags=19%, list=17%, signal=23%
GO_CARBOHYDRATE_CATABOLIC_PROCESS	GO_CARBOHYDRATE_CATABOLIC_PROCESS		102	0.219219	0.826046	0.679924	0.944399	1	1562	tags=13%, list=9%, signal=14%
GO_NUCLEOSIDE_TRIPHOSPHATE_BIOSYNTHETIC_PROCESS	GO_NUCLEOSIDE_TRIPHOSPHATE_BIOSYNTHETIC_PROCESS		56	0.281606	0.825145	0.623047	0.945538	1	2914	tags=25%, list=17%, signal=30%
GO_POSITIVE_REGULATION_OF_RECEPTOR_MEDIATED_ENDOCYTOSIS	GO_POSITIVE_REGULATION_OF_RECEPTOR_MEDIATED_ENDOCYTOSIS		45	0.229755	0.824843	0.705645	0.945509	1	2493	tags=16%, list=14%, signal=18%
GO_PURINE_CONTAINING_COMPOUND_CATABOLIC_PROCESS	GO_PURINE_CONTAINING_COMPOUND_CATABOLIC_PROCESS		47	0.215295	0.824755	0.736626	0.945018	1	4966	tags=38%, list=28%, signal=53%
GO_ANTIMICROBIAL_HUMORAL_RESPONSE	GO_ANTIMICROBIAL_HUMORAL_RESPONSE		41	0.255842	0.824709	0.715667	0.944448	1	5146	tags=39%, list=29%, signal=55%
GO_ASTROCYTE_DEVELOPMENT	GO_ASTROCYTE_DEVELOPMENT		19	0.284023	0.824635	0.690141	0.943942	1	3387	tags=26%, list=19%, signal=33%
GO_NEGATIVE_REGULATION_OF_DENDRITE_MORPHOGENESIS	GO_NEGATIVE_REGULATION_OF_DENDRITE_MORPHOGENESIS		15	0.28305	0.824599	0.709091	0.94335	1	1602	tags=20%, list=9%, signal=22%
GO_DNA_DEPENDENT_DNA_REPLICATION_MAINTENANCE_OF_FIDELITY	GO_DNA_DEPENDENT_DNA_REPLICATION_MAINTENANCE_OF_FIDELITY		19	0.320715	0.824538	0.649299	0.942812	1	4301	tags=53%, list=24%, signal=70%
GO_NEGATIVE_REGULATION_OF_ACTIN_FILAMENT_DEPOLYMERIZATION	GO_NEGATIVE_REGULATION_OF_ACTIN_FILAMENT_DEPOLYMERIZATION		31	0.262369	0.824512	0.701863	0.942196	1	2750	tags=19%, list=16%, signal=23%
GO_CELLULAR_IRON_ION_HOMEOSTASIS	GO_CELLULAR_IRON_ION_HOMEOSTASIS		40	0.234698	0.824356	0.741414	0.941836	1	3507	tags=23%, list=20%, signal=28%
GO_STAT_CASCADE	GO_STAT_CASCADE		43	0.245262	0.823805	0.647059	0.942269	1	3857	tags=30%, list=22%, signal=39%
GO_GLYCOPROTEIN_METABOLIC_PROCESS	GO_GLYCOPROTEIN_METABOLIC_PROCESS		328	0.183187	0.82319	0.765835	0.942841	1	2674	tags=17%, list=15%, signal=19%
GO_POSITIVE_REGULATION_OF_TOR_SIGNALING	GO_POSITIVE_REGULATION_OF_TOR_SIGNALING		26	0.252703	0.823169	0.68677	0.942214	1	3953	tags=35%, list=22%, signal=45%
GO_RESPONSE_TO_TOXIC_SUBSTANCE	GO_RESPONSE_TO_TOXIC_SUBSTANCE		227	0.178765	0.822893	0.801205	0.94213	1	2794	tags=16%, list=16%, signal=19%
GO_NEGATIVE_REGULATION_OF_TRANSPORT	GO_NEGATIVE_REGULATION_OF_TRANSPORT		424	0.176741	0.821472	0.777778	0.944392	1	2558	tags=14%, list=14%, signal=16%
GO_DNA_DEALKYLATION	GO_DNA_DEALKYLATION		20	0.264843	0.821296	0.710579	0.944107	1	4956	tags=35%, list=28%, signal=49%
GO_HYDROGEN_EXPORTING_ATPASE_ACTIVITY	GO_HYDROGEN_EXPORTING_ATPASE_ACTIVITY		26	0.279974	0.821242	0.673347	0.943551	1	3007	tags=27%, list=17%, signal=32%
GO_PHOSPHOLIPID_TRANSPORT	GO_PHOSPHOLIPID_TRANSPORT		53	0.221954	0.820909	0.727451	0.943548	1	3193	tags=17%, list=18%, signal=21%
GO_PHAGOSOME_ACIDIFICATION	GO_PHAGOSOME_ACIDIFICATION		25	0.268954	0.820715	0.694268	0.943304	1	3225	tags=24%, list=18%, signal=29%
GO_REGULATION_OF_RECEPTOR_MEDIATED_ENDOCYTOSIS	GO_REGULATION_OF_RECEPTOR_MEDIATED_ENDOCYTOSIS		76	0.203272	0.820601	0.767396	0.942896	1	2545	tags=16%, list=14%, signal=18%
GO_RESPONSE_TO_MANGANESE_ION	GO_RESPONSE_TO_MANGANESE_ION		16	0.282668	0.820476	0.697543	0.942496	1	4430	tags=38%, list=25%, signal=50%
GO_HYDROGEN_ION_TRANSMEMBRANE_TRANSPORT	GO_HYDROGEN_ION_TRANSMEMBRANE_TRANSPORT		97	0.262864	0.820067	0.631579	0.942683	1	4157	tags=29%, list=24%, signal=38%
GO_MUSCLE_CELL_DIFFERENTIATION	GO_MUSCLE_CELL_DIFFERENTIATION		215	0.20559	0.817759	0.691684	0.946821	1	1838	tags=12%, list=10%, signal=13%
GO_ORGANIC_HYDROXY_COMPOUND_CATABOLIC_PROCESS	GO_ORGANIC_HYDROXY_COMPOUND_CATABOLIC_PROCESS		69	0.203965	0.817126	0.762781	0.947455	1	1675	tags=13%, list=9%, signal=14%
GO_NAD_BINDING	GO_NAD_BINDING		52	0.253281	0.816235	0.672549	0.948623	1	2429	tags=21%, list=14%, signal=24%
GO_ENSHEATHMENT_OF_NEURONS	GO_ENSHEATHMENT_OF_NEURONS		87	0.216689	0.816103	0.685484	0.948225	1	1649	tags=13%, list=9%, signal=14%
GO_TOLL_LIKE_RECEPTOR_SIGNALING_PATHWAY	GO_TOLL_LIKE_RECEPTOR_SIGNALING_PATHWAY		84	0.228284	0.815982	0.670635	0.947798	1	1880	tags=17%, list=11%, signal=19%
GO_NUCLEOBASE_BIOSYNTHETIC_PROCESS	GO_NUCLEOBASE_BIOSYNTHETIC_PROCESS		17	0.337156	0.815708	0.66004	0.947709	1	4490	tags=47%, list=25%, signal=63%
GO_SPHINGOLIPID_BIOSYNTHETIC_PROCESS	GO_SPHINGOLIPID_BIOSYNTHETIC_PROCESS		70	0.227047	0.815674	0.705305	0.947112	1	2625	tags=19%, list=15%, signal=22%
GO_ENDONUCLEASE_ACTIVITY_ACTIVE_WITH_EITHER_RIBO_OR_DEOXYRIBONUCLEIC_ACIDS_AND_PRODUCING_5_PHOSPHOMONOESTERS	GO_ENDONUCLEASE_ACTIVITY_ACTIVE_WITH_EITHER_RIBO_OR_DEOXYRIBONUCLEIC_ACIDS_AND_PRODUCING_5_PHOSPHOMONOESTERS		34	0.277996	0.815287	0.654	0.947274	1	3127	tags=29%, list=18%, signal=36%
GO_POSITIVE_REGULATION_OF_EXOCYTOSIS	GO_POSITIVE_REGULATION_OF_EXOCYTOSIS		77	0.198556	0.814862	0.744511	0.947516	1	3467	tags=22%, list=20%, signal=27%
GO_GLUTATHIONE_TRANSFERASE_ACTIVITY	GO_GLUTATHIONE_TRANSFERASE_ACTIVITY		29	0.261755	0.814654	0.691235	0.947281	1	4979	tags=34%, list=28%, signal=48%
GO_ACTIVIN_RECEPTOR_SIGNALING_PATHWAY	GO_ACTIVIN_RECEPTOR_SIGNALING_PATHWAY		18	0.286094	0.814452	0.680608	0.947024	1	4767	tags=39%, list=27%, signal=53%
GO_RNA_STABILIZATION	GO_RNA_STABILIZATION		29	0.246174	0.814161	0.698	0.946957	1	3120	tags=21%, list=18%, signal=25%
GO_CYTOSOLIC_RIBOSOME	GO_CYTOSOLIC_RIBOSOME		108	0.326507	0.81414	0.631579	0.946342	1	5970	tags=50%, list=34%, signal=75%
GO_ACTIVATION_OF_INNATE_IMMUNE_RESPONSE	GO_ACTIVATION_OF_INNATE_IMMUNE_RESPONSE		200	0.207373	0.81381	0.69	0.946316	1	2116	tags=15%, list=12%, signal=17%
GO_METHYLATED_HISTONE_BINDING	GO_METHYLATED_HISTONE_BINDING		45	0.240013	0.813779	0.705021	0.945718	1	2216	tags=20%, list=13%, signal=23%
GO_SIGNAL_TRANSDUCTION_IN_ABSENCE_OF_LIGAND	GO_SIGNAL_TRANSDUCTION_IN_ABSENCE_OF_LIGAND		32	0.227296	0.813465	0.751491	0.945666	1	2430	tags=19%, list=14%, signal=22%
GO_K63_LINKED_POLYUBIQUITIN_BINDING	GO_K63_LINKED_POLYUBIQUITIN_BINDING		17	0.280701	0.813455	0.684739	0.945029	1	3403	tags=35%, list=19%, signal=44%
GO_RESPONSE_TO_INSULIN	GO_RESPONSE_TO_INSULIN		195	0.17102	0.812395	0.832298	0.946526	1	4545	tags=27%, list=26%, signal=36%
GO_NEGATIVE_REGULATION_OF_CATION_CHANNEL_ACTIVITY	GO_NEGATIVE_REGULATION_OF_CATION_CHANNEL_ACTIVITY		32	0.242437	0.812075	0.754065	0.946504	1	3419	tags=19%, list=19%, signal=23%
GO_OXIDATIVE_PHOSPHORYLATION	GO_OXIDATIVE_PHOSPHORYLATION		79	0.338372	0.811046	0.652695	0.947966	1	3744	tags=35%, list=21%, signal=45%
GO_PURINE_CONTAINING_COMPOUND_SALVAGE	GO_PURINE_CONTAINING_COMPOUND_SALVAGE		15	0.306917	0.810651	0.686888	0.94808	1	4490	tags=47%, list=25%, signal=63%
GO_MATURATION_OF_SSU_RRNA	GO_MATURATION_OF_SSU_RRNA		40	0.2996	0.810291	0.648703	0.948194	1	4151	tags=38%, list=24%, signal=49%
GO_NEGATIVE_REGULATION_OF_STEM_CELL_DIFFERENTIATION	GO_NEGATIVE_REGULATION_OF_STEM_CELL_DIFFERENTIATION		41	0.222355	0.809837	0.758985	0.948482	1	1241	tags=10%, list=7%, signal=10%
GO_REGULATION_OF_PROTEIN_TYROSINE_KINASE_ACTIVITY	GO_REGULATION_OF_PROTEIN_TYROSINE_KINASE_ACTIVITY		59	0.208483	0.809795	0.782696	0.947907	1	1290	tags=12%, list=7%, signal=13%
GO_MITOCHONDRION_MORPHOGENESIS	GO_MITOCHONDRION_MORPHOGENESIS		19	0.282412	0.809007	0.687747	0.948851	1	2960	tags=32%, list=17%, signal=38%
GO_MUSCLE_CELL_PROLIFERATION	GO_MUSCLE_CELL_PROLIFERATION		17	0.273251	0.808768	0.730159	0.948682	1	1546	tags=18%, list=9%, signal=19%
GO_PROTEIN_SECRETION	GO_PROTEIN_SECRETION		107	0.210755	0.808504	0.746	0.948564	1	1817	tags=12%, list=10%, signal=13%
GO_HEPATICOBILIARY_SYSTEM_DEVELOPMENT	GO_HEPATICOBILIARY_SYSTEM_DEVELOPMENT		125	0.180741	0.807191	0.815238	0.950606	1	4152	tags=27%, list=24%, signal=35%
GO_REGULATION_OF_STEROID_HORMONE_SECRETION	GO_REGULATION_OF_STEROID_HORMONE_SECRETION		19	0.272409	0.80709	0.721154	0.950162	1	3831	tags=26%, list=22%, signal=34%
GO_NUCLEOSIDE_MONOPHOSPHATE_BIOSYNTHETIC_PROCESS	GO_NUCLEOSIDE_MONOPHOSPHATE_BIOSYNTHETIC_PROCESS		77	0.264373	0.806853	0.639604	0.949967	1	4238	tags=34%, list=24%, signal=44%
GO_DNA_STRAND_ELONGATION	GO_DNA_STRAND_ELONGATION		29	0.317659	0.806701	0.659319	0.949619	1	2257	tags=24%, list=13%, signal=28%
GO_MICROTUBULE_POLYMERIZATION	GO_MICROTUBULE_POLYMERIZATION		26	0.247623	0.806572	0.725451	0.949223	1	1329	tags=19%, list=8%, signal=21%
GO_REGULATION_OF_PROTEIN_KINASE_A_SIGNALING	GO_REGULATION_OF_PROTEIN_KINASE_A_SIGNALING		16	0.278985	0.806085	0.75502	0.949509	1	4460	tags=44%, list=25%, signal=58%
GO_RRNA_CATABOLIC_PROCESS	GO_RRNA_CATABOLIC_PROCESS		17	0.292084	0.80596	0.695049	0.949131	1	1438	tags=18%, list=8%, signal=19%
GO_DEFINITIVE_HEMOPOIESIS	GO_DEFINITIVE_HEMOPOIESIS		16	0.291911	0.805817	0.713987	0.948755	1	4166	tags=31%, list=24%, signal=41%
GO_SUGAR_TRANSMEMBRANE_TRANSPORTER_ACTIVITY	GO_SUGAR_TRANSMEMBRANE_TRANSPORTER_ACTIVITY		32	0.231568	0.805802	0.750916	0.948137	1	2607	tags=16%, list=15%, signal=18%
GO_GASTRULATION_WITH_MOUTH_FORMING_SECOND	GO_GASTRULATION_WITH_MOUTH_FORMING_SECOND		25	0.255538	0.805617	0.706226	0.947817	1	2681	tags=24%, list=15%, signal=28%
GO_PHOSPHOLIPID_TRANSPORTER_ACTIVITY	GO_PHOSPHOLIPID_TRANSPORTER_ACTIVITY		45	0.227977	0.805271	0.738337	0.947813	1	5262	tags=38%, list=30%, signal=54%
GO_NUCLEOSIDE_DIPHOSPHATE_KINASE_ACTIVITY	GO_NUCLEOSIDE_DIPHOSPHATE_KINASE_ACTIVITY		15	0.291199	0.804654	0.72093	0.948372	1	2870	tags=20%, list=16%, signal=24%
GO_APOLIPOPROTEIN_BINDING	GO_APOLIPOPROTEIN_BINDING		15	0.282854	0.804302	0.716475	0.948404	1	2	tags=7%, list=0%, signal=7%
GO_CYCLIC_NUCLEOTIDE_BINDING	GO_CYCLIC_NUCLEOTIDE_BINDING		33	0.255778	0.804003	0.711864	0.948368	1	4961	tags=39%, list=28%, signal=55%
GO_POSITIVE_REGULATION_OF_SEQUESTERING_OF_CALCIUM_ION	GO_POSITIVE_REGULATION_OF_SEQUESTERING_OF_CALCIUM_ION		16	0.292405	0.803705	0.698574	0.948292	1	1669	tags=13%, list=9%, signal=14%
GO_CELLULAR_RESPONSE_TO_EXTRACELLULAR_STIMULUS	GO_CELLULAR_RESPONSE_TO_EXTRACELLULAR_STIMULUS		179	0.178753	0.803336	0.820459	0.948402	1	2712	tags=18%, list=15%, signal=21%
GO_DEATH_RECEPTOR_BINDING	GO_DEATH_RECEPTOR_BINDING		16	0.276676	0.803023	0.729897	0.948377	1	2447	tags=25%, list=14%, signal=29%
GO_POSITIVE_REGULATION_OF_STEROID_METABOLIC_PROCESS	GO_POSITIVE_REGULATION_OF_STEROID_METABOLIC_PROCESS		22	0.256389	0.80238	0.743644	0.948995	1	637	tags=9%, list=4%, signal=9%
GO_REGULATION_OF_CHROMATIN_SILENCING	GO_REGULATION_OF_CHROMATIN_SILENCING		21	0.26195	0.802302	0.72147	0.9485	1	4310	tags=38%, list=24%, signal=50%
GO_MUSCLE_FIBER_DEVELOPMENT	GO_MUSCLE_FIBER_DEVELOPMENT		38	0.239038	0.8021	0.71831	0.948229	1	1838	tags=13%, list=10%, signal=15%
GO_TERMINATION_OF_RNA_POLYMERASE_II_TRANSCRIPTION	GO_TERMINATION_OF_RNA_POLYMERASE_II_TRANSCRIPTION		61	0.261599	0.802033	0.667969	0.947717	1	4301	tags=38%, list=24%, signal=50%
GO_FEMALE_GAMETE_GENERATION	GO_FEMALE_GAMETE_GENERATION		81	0.186527	0.801662	0.814583	0.947757	1	3805	tags=22%, list=22%, signal=28%
GO_EXON_EXON_JUNCTION_COMPLEX	GO_EXON_EXON_JUNCTION_COMPLEX		20	0.279365	0.800512	0.679061	0.949338	1	3042	tags=25%, list=17%, signal=30%
GO_CYTOSOLIC_PART	GO_CYTOSOLIC_PART		208	0.243055	0.799527	0.642718	0.950625	1	4151	tags=30%, list=24%, signal=39%
GO_A_BAND	GO_A_BAND		31	0.247682	0.798641	0.732793	0.951762	1	3204	tags=16%, list=18%, signal=20%
GO_HEART_GROWTH	GO_HEART_GROWTH		23	0.262442	0.798555	0.709234	0.951265	1	1731	tags=17%, list=10%, signal=19%
GO_NEGATIVE_REGULATION_OF_ADHERENS_JUNCTION_ORGANIZATION	GO_NEGATIVE_REGULATION_OF_ADHERENS_JUNCTION_ORGANIZATION		15	0.282128	0.798505	0.707911	0.950727	1	813	tags=13%, list=5%, signal=14%
GO_POSITIVE_REGULATION_OF_CARDIAC_MUSCLE_TISSUE_DEVELOPMENT	GO_POSITIVE_REGULATION_OF_CARDIAC_MUSCLE_TISSUE_DEVELOPMENT		28	0.251915	0.798027	0.769068	0.951014	1	1762	tags=14%, list=10%, signal=16%
GO_INTRINSIC_APOPTOTIC_SIGNALING_PATHWAY_IN_RESPONSE_TO_ENDOPLASMIC_RETICULUM_STRESS	GO_INTRINSIC_APOPTOTIC_SIGNALING_PATHWAY_IN_RESPONSE_TO_ENDOPLASMIC_RETICULUM_STRESS		28	0.249471	0.797778	0.689218	0.950897	1	1602	tags=18%, list=9%, signal=20%
GO_RESPONSE_TO_BMP	GO_RESPONSE_TO_BMP		87	0.216912	0.797301	0.751012	0.95119	1	4191	tags=24%, list=24%, signal=31%
GO_CYCLIC_NUCLEOTIDE_CATABOLIC_PROCESS	GO_CYCLIC_NUCLEOTIDE_CATABOLIC_PROCESS		17	0.29182	0.797007	0.708419	0.951133	1	4966	tags=47%, list=28%, signal=65%
GO_URONIC_ACID_METABOLIC_PROCESS	GO_URONIC_ACID_METABOLIC_PROCESS		25	0.291095	0.796927	0.717602	0.950652	1	6292	tags=44%, list=36%, signal=68%
GO_REGULATION_OF_ESTABLISHMENT_OR_MAINTENANCE_OF_CELL_POLARITY	GO_REGULATION_OF_ESTABLISHMENT_OR_MAINTENANCE_OF_CELL_POLARITY		20	0.266417	0.796865	0.708911	0.950144	1	4765	tags=50%, list=27%, signal=68%
GO_REGULATION_OF_DEFENSE_RESPONSE_TO_VIRUS_BY_HOST	GO_REGULATION_OF_DEFENSE_RESPONSE_TO_VIRUS_BY_HOST		125	0.188018	0.796285	0.795229	0.950632	1	4831	tags=30%, list=27%, signal=40%
GO_CHAPERONE_MEDIATED_PROTEIN_FOLDING	GO_CHAPERONE_MEDIATED_PROTEIN_FOLDING		43	0.2335	0.796055	0.724409	0.950441	1	1907	tags=14%, list=11%, signal=16%
GO_DRUG_TRANSMEMBRANE_TRANSPORT	GO_DRUG_TRANSMEMBRANE_TRANSPORT		19	0.264363	0.795604	0.733059	0.950693	1	6785	tags=53%, list=38%, signal=85%
GO_ATP_DEPENDENT_DNA_HELICASE_ACTIVITY	GO_ATP_DEPENDENT_DNA_HELICASE_ACTIVITY		32	0.283913	0.795485	0.672515	0.950274	1	4106	tags=44%, list=23%, signal=57%
GO_REGULATION_OF_MEMBRANE_LIPID_DISTRIBUTION	GO_REGULATION_OF_MEMBRANE_LIPID_DISTRIBUTION		37	0.231794	0.795009	0.767535	0.950561	1	5262	tags=41%, list=30%, signal=58%
GO_POSITIVE_REGULATION_OF_PROTEIN_OLIGOMERIZATION	GO_POSITIVE_REGULATION_OF_PROTEIN_OLIGOMERIZATION		17	0.286998	0.79467	0.716049	0.950585	1	2349	tags=18%, list=13%, signal=20%
GO_POSITIVE_REGULATION_OF_PATHWAY_RESTRICTED_SMAD_PROTEIN_PHOSPHORYLATION	GO_POSITIVE_REGULATION_OF_PATHWAY_RESTRICTED_SMAD_PROTEIN_PHOSPHORYLATION		44	0.227484	0.793769	0.729839	0.951681	1	3567	tags=23%, list=20%, signal=28%
GO_CYTOPLASMIC_REGION	GO_CYTOPLASMIC_REGION		266	0.178926	0.793726	0.814286	0.951146	1	3809	tags=22%, list=22%, signal=28%
GO_ORGANOPHOSPHATE_CATABOLIC_PROCESS	GO_ORGANOPHOSPHATE_CATABOLIC_PROCESS		110	0.177858	0.79329	0.841897	0.951361	1	4966	tags=35%, list=28%, signal=48%
GO_MITOCHONDRIAL_MEMBRANE_ORGANIZATION	GO_MITOCHONDRIAL_MEMBRANE_ORGANIZATION		90	0.219035	0.792751	0.70751	0.951783	1	1602	tags=14%, list=9%, signal=16%
GO_REGULATION_OF_RHODOPSIN_MEDIATED_SIGNALING_PATHWAY	GO_REGULATION_OF_RHODOPSIN_MEDIATED_SIGNALING_PATHWAY		24	0.260236	0.791246	0.745527	0.954092	1	4104	tags=25%, list=23%, signal=33%
GO_ORGANELLAR_LARGE_RIBOSOMAL_SUBUNIT	GO_ORGANELLAR_LARGE_RIBOSOMAL_SUBUNIT		30	0.346018	0.790657	0.663424	0.954577	1	2038	tags=23%, list=12%, signal=26%
GO_EPITHELIAL_CELL_DEVELOPMENT	GO_EPITHELIAL_CELL_DEVELOPMENT		179	0.194561	0.790567	0.761411	0.954116	1	3646	tags=22%, list=21%, signal=27%
GO_CENTROSOME_LOCALIZATION	GO_CENTROSOME_LOCALIZATION		17	0.277742	0.790311	0.73374	0.953998	1	5462	tags=47%, list=31%, signal=68%
GO_GLYCOLIPID_BIOSYNTHETIC_PROCESS	GO_GLYCOLIPID_BIOSYNTHETIC_PROCESS		58	0.205026	0.790266	0.784585	0.953444	1	2984	tags=22%, list=17%, signal=27%
GO_REGULATION_OF_SYNAPTIC_VESICLE_EXOCYTOSIS	GO_REGULATION_OF_SYNAPTIC_VESICLE_EXOCYTOSIS		19	0.266156	0.789938	0.725051	0.953466	1	2050	tags=16%, list=12%, signal=18%
GO_BETA_1_3_GALACTOSYLTRANSFERASE_ACTIVITY	GO_BETA_1_3_GALACTOSYLTRANSFERASE_ACTIVITY		15	0.282847	0.78941	0.720532	0.953842	1	3734	tags=33%, list=21%, signal=42%
GO_NEGATIVE_REGULATION_OF_CELL_MATRIX_ADHESION	GO_NEGATIVE_REGULATION_OF_CELL_MATRIX_ADHESION		28	0.252834	0.789336	0.722793	0.953364	1	813	tags=11%, list=5%, signal=11%
GO_REGULATION_OF_POTASSIUM_ION_TRANSMEMBRANE_TRANSPORTER_ACTIVITY	GO_REGULATION_OF_POTASSIUM_ION_TRANSMEMBRANE_TRANSPORTER_ACTIVITY		40	0.228736	0.787902	0.738494	0.955441	1	5141	tags=38%, list=29%, signal=53%
GO_REGULATION_OF_CARDIAC_MUSCLE_CONTRACTION_BY_REGULATION_OF_THE_RELEASE_OF_SEQUESTERED_CALCIUM_ION	GO_REGULATION_OF_CARDIAC_MUSCLE_CONTRACTION_BY_REGULATION_OF_THE_RELEASE_OF_SEQUESTERED_CALCIUM_ION		19	0.288678	0.78789	0.684959	0.954829	1	1731	tags=16%, list=10%, signal=17%
GO_REGULATION_OF_GLYCOPROTEIN_METABOLIC_PROCESS	GO_REGULATION_OF_GLYCOPROTEIN_METABOLIC_PROCESS		38	0.217052	0.787686	0.762313	0.954608	1	3790	tags=26%, list=21%, signal=33%
GO_CELLULAR_RESPONSE_TO_TOXIC_SUBSTANCE	GO_CELLULAR_RESPONSE_TO_TOXIC_SUBSTANCE		24	0.234849	0.787564	0.776238	0.954213	1	3310	tags=21%, list=19%, signal=26%
GO_POSITIVE_REGULATION_OF_INNATE_IMMUNE_RESPONSE	GO_POSITIVE_REGULATION_OF_INNATE_IMMUNE_RESPONSE		239	0.200698	0.787457	0.731557	0.953774	1	4123	tags=25%, list=23%, signal=32%
GO_NEGATIVE_REGULATION_OF_CALCIUM_MEDIATED_SIGNALING	GO_NEGATIVE_REGULATION_OF_CALCIUM_MEDIATED_SIGNALING		18	0.293684	0.787352	0.716327	0.953367	1	1669	tags=11%, list=9%, signal=12%
GO_VERY_LONG_CHAIN_FATTY_ACID_METABOLIC_PROCESS	GO_VERY_LONG_CHAIN_FATTY_ACID_METABOLIC_PROCESS		25	0.246493	0.786476	0.759674	0.954391	1	881	tags=12%, list=5%, signal=13%
GO_REGULATION_OF_HORMONE_BIOSYNTHETIC_PROCESS	GO_REGULATION_OF_HORMONE_BIOSYNTHETIC_PROCESS		18	0.262668	0.785993	0.753653	0.954687	1	3468	tags=22%, list=20%, signal=28%
GO_PROSTATE_GLAND_MORPHOGENESIS	GO_PROSTATE_GLAND_MORPHOGENESIS		23	0.261885	0.785263	0.725252	0.95546	1	476	tags=9%, list=3%, signal=9%
GO_FATTY_ACYL_COA_BINDING	GO_FATTY_ACYL_COA_BINDING		31	0.250569	0.784515	0.70751	0.956263	1	3178	tags=26%, list=18%, signal=31%
GO_CELL_COMMUNICATION_INVOLVED_IN_CARDIAC_CONDUCTION	GO_CELL_COMMUNICATION_INVOLVED_IN_CARDIAC_CONDUCTION		35	0.253507	0.784473	0.685072	0.955719	1	2227	tags=17%, list=13%, signal=20%
GO_CELL_CELL_CONTACT_ZONE	GO_CELL_CELL_CONTACT_ZONE		63	0.22514	0.783811	0.718504	0.956351	1	4481	tags=29%, list=25%, signal=38%
GO_NUCLEOSIDE_MONOPHOSPHATE_METABOLIC_PROCESS	GO_NUCLEOSIDE_MONOPHOSPHATE_METABOLIC_PROCESS		225	0.237198	0.783421	0.643969	0.956437	1	3794	tags=27%, list=21%, signal=34%
GO_CORE_PROMOTER_SEQUENCE_SPECIFIC_DNA_BINDING	GO_CORE_PROMOTER_SEQUENCE_SPECIFIC_DNA_BINDING		98	0.187375	0.783259	0.804	0.956134	1	3599	tags=23%, list=20%, signal=29%
GO_DETECTION_OF_MECHANICAL_STIMULUS_INVOLVED_IN_SENSORY_PERCEPTION	GO_DETECTION_OF_MECHANICAL_STIMULUS_INVOLVED_IN_SENSORY_PERCEPTION		22	0.280144	0.783181	0.746808	0.955646	1	923	tags=9%, list=5%, signal=10%
GO_PEPTIDE_SECRETION	GO_PEPTIDE_SECRETION		53	0.224071	0.782977	0.778865	0.955417	1	1609	tags=11%, list=9%, signal=12%
GO_CILIUM_MOVEMENT	GO_CILIUM_MOVEMENT		30	0.277654	0.782518	0.738614	0.955644	1	5741	tags=43%, list=33%, signal=64%
GO_REGULATION_OF_RESPONSE_TO_BIOTIC_STIMULUS	GO_REGULATION_OF_RESPONSE_TO_BIOTIC_STIMULUS		219	0.175407	0.782403	0.809055	0.955231	1	4680	tags=28%, list=27%, signal=38%
GO_NEGATIVE_REGULATION_OF_CALCIUM_ION_TRANSMEMBRANE_TRANSPORT	GO_NEGATIVE_REGULATION_OF_CALCIUM_ION_TRANSMEMBRANE_TRANSPORT		28	0.255045	0.7817	0.73029	0.955909	1	1669	tags=11%, list=9%, signal=12%
GO_CHAPERONE_BINDING	GO_CHAPERONE_BINDING		77	0.206093	0.781208	0.747036	0.956181	1	1752	tags=13%, list=10%, signal=14%
GO_POSITIVE_REGULATION_OF_HEART_GROWTH	GO_POSITIVE_REGULATION_OF_HEART_GROWTH		26	0.241282	0.780228	0.767591	0.957403	1	1762	tags=15%, list=10%, signal=17%
GO_REGULATION_OF_LIPID_METABOLIC_PROCESS	GO_REGULATION_OF_LIPID_METABOLIC_PROCESS		263	0.167696	0.779495	0.882957	0.95808	1	2933	tags=16%, list=17%, signal=19%
GO_HINDBRAIN_MORPHOGENESIS	GO_HINDBRAIN_MORPHOGENESIS		38	0.232952	0.778916	0.771894	0.958495	1	5130	tags=39%, list=29%, signal=56%
GO_NEGATIVE_REGULATION_OF_EPITHELIAL_CELL_PROLIFERATION	GO_NEGATIVE_REGULATION_OF_EPITHELIAL_CELL_PROLIFERATION		110	0.185491	0.778069	0.820408	0.959422	1	3319	tags=17%, list=19%, signal=21%
GO_MICROTUBULE_MOTOR_ACTIVITY	GO_MICROTUBULE_MOTOR_ACTIVITY		75	0.212293	0.777511	0.765408	0.95981	1	3582	tags=24%, list=20%, signal=30%
GO_CHANNEL_INHIBITOR_ACTIVITY	GO_CHANNEL_INHIBITOR_ACTIVITY		34	0.21748	0.777336	0.767782	0.959526	1	1731	tags=12%, list=10%, signal=13%
GO_CONDENSED_NUCLEAR_CHROMOSOME	GO_CONDENSED_NUCLEAR_CHROMOSOME		71	0.229798	0.775366	0.714	0.962567	1	3235	tags=27%, list=18%, signal=33%
GO_SYNAPTIC_VESICLE_RECYCLING	GO_SYNAPTIC_VESICLE_RECYCLING		23	0.253687	0.774233	0.789796	0.964067	1	583	tags=9%, list=3%, signal=9%
GO_MULTI_ORGANISM_METABOLIC_PROCESS	GO_MULTI_ORGANISM_METABOLIC_PROCESS		136	0.275251	0.77357	0.648438	0.964653	1	4151	tags=35%, list=24%, signal=46%
GO_PROTEIN_LOCALIZATION_TO_MITOCHONDRION	GO_PROTEIN_LOCALIZATION_TO_MITOCHONDRION		62	0.250086	0.773489	0.683267	0.96418	1	3301	tags=26%, list=19%, signal=32%
GO_REGULATION_OF_EXOCYTOSIS	GO_REGULATION_OF_EXOCYTOSIS		175	0.184598	0.773439	0.828921	0.963648	1	2666	tags=15%, list=15%, signal=18%
GO_REGULATION_OF_TOLL_LIKE_RECEPTOR_SIGNALING_PATHWAY	GO_REGULATION_OF_TOLL_LIKE_RECEPTOR_SIGNALING_PATHWAY		46	0.22309	0.773437	0.765182	0.963027	1	2171	tags=17%, list=12%, signal=20%
GO_REGULATION_OF_ORGAN_GROWTH	GO_REGULATION_OF_ORGAN_GROWTH		69	0.197125	0.773321	0.835729	0.962606	1	2206	tags=14%, list=12%, signal=16%
GO_KINESIN_COMPLEX	GO_KINESIN_COMPLEX		53	0.221001	0.772834	0.760479	0.962892	1	3586	tags=26%, list=20%, signal=33%
GO_OXIDOREDUCTASE_ACTIVITY_ACTING_ON_A_HEME_GROUP_OF_DONORS	GO_OXIDOREDUCTASE_ACTIVITY_ACTING_ON_A_HEME_GROUP_OF_DONORS		23	0.332077	0.772408	0.675403	0.963029	1	3452	tags=30%, list=20%, signal=38%
GO_EPOXYGENASE_P450_PATHWAY	GO_EPOXYGENASE_P450_PATHWAY		16	0.27888	0.772399	0.744467	0.962418	1	12737	tags=100%, list=72%, signal=359%
GO_STRIATED_MUSCLE_ADAPTATION	GO_STRIATED_MUSCLE_ADAPTATION		21	0.263764	0.772286	0.782609	0.96201	1	4258	tags=33%, list=24%, signal=44%
GO_POSITIVE_REGULATION_OF_LEUKOCYTE_APOPTOTIC_PROCESS	GO_POSITIVE_REGULATION_OF_LEUKOCYTE_APOPTOTIC_PROCESS		26	0.243849	0.772266	0.739919	0.961422	1	2349	tags=15%, list=13%, signal=18%
GO_RIBOSOMAL_SMALL_SUBUNIT_BIOGENESIS	GO_RIBOSOMAL_SMALL_SUBUNIT_BIOGENESIS		54	0.285869	0.771635	0.675299	0.961889	1	4151	tags=37%, list=24%, signal=48%
GO_NADH_DEHYDROGENASE_COMPLEX	GO_NADH_DEHYDROGENASE_COMPLEX		42	0.338444	0.771344	0.677866	0.961795	1	3637	tags=33%, list=21%, signal=42%
GO_IMMUNOGLOBULIN_PRODUCTION	GO_IMMUNOGLOBULIN_PRODUCTION		40	0.225309	0.771105	0.773279	0.961605	1	4774	tags=33%, list=27%, signal=44%
GO_POSITIVE_REGULATION_OF_HISTONE_METHYLATION	GO_POSITIVE_REGULATION_OF_HISTONE_METHYLATION		28	0.237231	0.770369	0.769384	0.962337	1	4014	tags=32%, list=23%, signal=42%
GO_NUCLEOSIDE_BISPHOSPHATE_METABOLIC_PROCESS	GO_NUCLEOSIDE_BISPHOSPHATE_METABOLIC_PROCESS		37	0.238535	0.770236	0.786127	0.961967	1	4261	tags=32%, list=24%, signal=43%
GO_ETHANOLAMINE_CONTAINING_COMPOUND_METABOLIC_PROCESS	GO_ETHANOLAMINE_CONTAINING_COMPOUND_METABOLIC_PROCESS		82	0.188671	0.769038	0.828	0.96356	1	2671	tags=17%, list=15%, signal=20%
GO_NEGATIVE_REGULATION_OF_I_KAPPAB_KINASE_NF_KAPPAB_SIGNALING	GO_NEGATIVE_REGULATION_OF_I_KAPPAB_KINASE_NF_KAPPAB_SIGNALING		49	0.214763	0.767912	0.783038	0.964967	1	1450	tags=12%, list=8%, signal=13%
GO_POSITIVE_REGULATION_OF_GLYCOPROTEIN_METABOLIC_PROCESS	GO_POSITIVE_REGULATION_OF_GLYCOPROTEIN_METABOLIC_PROCESS		17	0.258306	0.767521	0.781312	0.965076	1	4560	tags=41%, list=26%, signal=55%
GO_ENDOTHELIAL_CELL_DIFFERENTIATION	GO_ENDOTHELIAL_CELL_DIFFERENTIATION		70	0.214159	0.767385	0.739479	0.964708	1	2456	tags=19%, list=14%, signal=21%
GO_REGULATION_OF_MESODERM_DEVELOPMENT	GO_REGULATION_OF_MESODERM_DEVELOPMENT		15	0.280684	0.766785	0.786853	0.965157	1	851	tags=13%, list=5%, signal=14%
GO_PHOSPHATIDYLCHOLINE_METABOLIC_PROCESS	GO_PHOSPHATIDYLCHOLINE_METABOLIC_PROCESS		61	0.195915	0.765605	0.831643	0.966611	1	2671	tags=16%, list=15%, signal=19%
GO_NEGATIVE_REGULATION_OF_STRIATED_MUSCLE_CELL_APOPTOTIC_PROCESS	GO_NEGATIVE_REGULATION_OF_STRIATED_MUSCLE_CELL_APOPTOTIC_PROCESS		17	0.249859	0.765559	0.791837	0.966072	1	3957	tags=24%, list=22%, signal=30%
GO_REGULATION_OF_POTASSIUM_ION_TRANSMEMBRANE_TRANSPORT	GO_REGULATION_OF_POTASSIUM_ION_TRANSMEMBRANE_TRANSPORT		59	0.213864	0.765021	0.770492	0.966401	1	4575	tags=31%, list=26%, signal=41%
GO_MICROTUBULE_END	GO_MICROTUBULE_END		21	0.258528	0.764493	0.767068	0.966705	1	2275	tags=19%, list=13%, signal=22%
GO_NEURON_APOPTOTIC_PROCESS	GO_NEURON_APOPTOTIC_PROCESS		34	0.20806	0.764269	0.838509	0.966502	1	3539	tags=26%, list=20%, signal=33%
GO_ORGANIC_ACID_CATABOLIC_PROCESS	GO_ORGANIC_ACID_CATABOLIC_PROCESS		197	0.184548	0.763563	0.813592	0.967136	1	2285	tags=15%, list=13%, signal=17%
GO_HEMATOPOIETIC_PROGENITOR_CELL_DIFFERENTIATION	GO_HEMATOPOIETIC_PROGENITOR_CELL_DIFFERENTIATION		94	0.194466	0.763501	0.82268	0.966629	1	2188	tags=13%, list=12%, signal=14%
GO_AMINO_ACID_BETAINE_METABOLIC_PROCESS	GO_AMINO_ACID_BETAINE_METABOLIC_PROCESS		18	0.258395	0.763124	0.769397	0.966713	1	5472	tags=44%, list=31%, signal=64%
GO_DNA_REPLICATION_INITIATION	GO_DNA_REPLICATION_INITIATION		28	0.31748	0.763095	0.677734	0.966145	1	3340	tags=36%, list=19%, signal=44%
GO_PATTERN_RECOGNITION_RECEPTOR_SIGNALING_PATHWAY	GO_PATTERN_RECOGNITION_RECEPTOR_SIGNALING_PATHWAY		107	0.207426	0.763	0.714004	0.9657	1	4123	tags=28%, list=23%, signal=36%
GO_CARDIOCYTE_DIFFERENTIATION	GO_CARDIOCYTE_DIFFERENTIATION		90	0.198448	0.762931	0.800821	0.965208	1	1762	tags=12%, list=10%, signal=14%
GO_REGULATION_OF_CARDIAC_MUSCLE_CELL_ACTION_POTENTIAL	GO_REGULATION_OF_CARDIAC_MUSCLE_CELL_ACTION_POTENTIAL		19	0.269327	0.762889	0.729783	0.96468	1	4098	tags=32%, list=23%, signal=41%
GO_ACTIVATING_TRANSCRIPTION_FACTOR_BINDING	GO_ACTIVATING_TRANSCRIPTION_FACTOR_BINDING		57	0.207085	0.762885	0.806061	0.964071	1	1234	tags=11%, list=7%, signal=11%
GO_DEOXYRIBONUCLEOTIDE_METABOLIC_PROCESS	GO_DEOXYRIBONUCLEOTIDE_METABOLIC_PROCESS		33	0.262823	0.762595	0.706994	0.963958	1	4037	tags=36%, list=23%, signal=47%
GO_ENZYME_INHIBITOR_ACTIVITY	GO_ENZYME_INHIBITOR_ACTIVITY		336	0.164852	0.761746	0.925553	0.964883	1	3011	tags=16%, list=17%, signal=19%
GO_PROTON_TRANSPORTING_TWO_SECTOR_ATPASE_COMPLEX_PROTON_TRANSPORTING_DOMAIN	GO_PROTON_TRANSPORTING_TWO_SECTOR_ATPASE_COMPLEX_PROTON_TRANSPORTING_DOMAIN		21	0.302908	0.761431	0.68616	0.964811	1	4157	tags=38%, list=24%, signal=50%
GO_GLUTATHIONE_DERIVATIVE_METABOLIC_PROCESS	GO_GLUTATHIONE_DERIVATIVE_METABOLIC_PROCESS		20	0.286646	0.761386	0.727811	0.964277	1	4023	tags=30%, list=23%, signal=39%
GO_POSITIVE_REGULATION_OF_GROWTH	GO_POSITIVE_REGULATION_OF_GROWTH		223	0.172809	0.761296	0.883168	0.963824	1	4329	tags=26%, list=25%, signal=33%
GO_CELLULAR_MODIFIED_AMINO_ACID_METABOLIC_PROCESS	GO_CELLULAR_MODIFIED_AMINO_ACID_METABOLIC_PROCESS		201	0.172602	0.760904	0.88381	0.963875	1	3211	tags=16%, list=18%, signal=20%
GO_REGULATION_OF_PROTEIN_INSERTION_INTO_MITOCHONDRIAL_MEMBRANE_INVOLVED_IN_APOPTOTIC_SIGNALING_PATHWAY	GO_REGULATION_OF_PROTEIN_INSERTION_INTO_MITOCHONDRIAL_MEMBRANE_INVOLVED_IN_APOPTOTIC_SIGNALING_PATHWAY		29	0.232362	0.760635	0.784431	0.96377	1	4502	tags=34%, list=25%, signal=46%
GO_AUDITORY_RECEPTOR_CELL_DEVELOPMENT	GO_AUDITORY_RECEPTOR_CELL_DEVELOPMENT		18	0.252125	0.76048	0.814371	0.963435	1	3586	tags=28%, list=20%, signal=35%
GO_NUCLEOSIDE_TRIPHOSPHATE_METABOLIC_PROCESS	GO_NUCLEOSIDE_TRIPHOSPHATE_METABOLIC_PROCESS		212	0.235998	0.760443	0.683794	0.962886	1	4622	tags=33%, list=26%, signal=44%
GO_DORSAL_VENTRAL_AXIS_SPECIFICATION	GO_DORSAL_VENTRAL_AXIS_SPECIFICATION		20	0.236557	0.760353	0.808642	0.96242	1	2681	tags=25%, list=15%, signal=29%
GO_HORMONE_MEDIATED_SIGNALING_PATHWAY	GO_HORMONE_MEDIATED_SIGNALING_PATHWAY		144	0.171388	0.760319	0.902041	0.961862	1	3646	tags=19%, list=21%, signal=24%
GO_TONGUE_DEVELOPMENT	GO_TONGUE_DEVELOPMENT		19	0.272805	0.759973	0.767717	0.961824	1	12845	tags=100%, list=73%, signal=366%
GO_VASODILATION	GO_VASODILATION		26	0.246727	0.759811	0.797895	0.961495	1	5146	tags=31%, list=29%, signal=43%
GO_PHOSPHATIDYLINOSITOL_3_4_5_TRISPHOSPHATE_BINDING	GO_PHOSPHATIDYLINOSITOL_3_4_5_TRISPHOSPHATE_BINDING		32	0.235478	0.759794	0.790099	0.960915	1	1929	tags=16%, list=11%, signal=18%
GO_PROTON_TRANSPORTING_TWO_SECTOR_ATPASE_COMPLEX_CATALYTIC_DOMAIN	GO_PROTON_TRANSPORTING_TWO_SECTOR_ATPASE_COMPLEX_CATALYTIC_DOMAIN		17	0.284036	0.759325	0.753112	0.961112	1	3007	tags=24%, list=17%, signal=28%
GO_CELLULAR_AMINO_ACID_CATABOLIC_PROCESS	GO_CELLULAR_AMINO_ACID_CATABOLIC_PROCESS		106	0.186673	0.759296	0.826848	0.960552	1	4492	tags=25%, list=25%, signal=34%
GO_RETINOIC_ACID_METABOLIC_PROCESS	GO_RETINOIC_ACID_METABOLIC_PROCESS		20	0.263579	0.757922	0.806026	0.962362	1	13008	tags=100%, list=74%, signal=379%
GO_ACTIVATION_OF_CYSTEINE_TYPE_ENDOPEPTIDASE_ACTIVITY	GO_ACTIVATION_OF_CYSTEINE_TYPE_ENDOPEPTIDASE_ACTIVITY		92	0.186092	0.75724	0.818182	0.962954	1	3275	tags=20%, list=19%, signal=24%
GO_LIPID_PHOSPHORYLATION	GO_LIPID_PHOSPHORYLATION		94	0.19526	0.756671	0.818367	0.963345	1	2614	tags=17%, list=15%, signal=20%
GO_CARBOHYDRATE_DERIVATIVE_TRANSPORTER_ACTIVITY	GO_CARBOHYDRATE_DERIVATIVE_TRANSPORTER_ACTIVITY		34	0.230632	0.756104	0.778656	0.963733	1	2620	tags=21%, list=15%, signal=24%
GO_NEGATIVE_REGULATION_OF_CALCIUM_ION_TRANSPORT_INTO_CYTOSOL	GO_NEGATIVE_REGULATION_OF_CALCIUM_ION_TRANSPORT_INTO_CYTOSOL		19	0.267471	0.756033	0.786611	0.963245	1	1669	tags=11%, list=9%, signal=12%
GO_PHOSPHATIDYLGLYCEROL_METABOLIC_PROCESS	GO_PHOSPHATIDYLGLYCEROL_METABOLIC_PROCESS		30	0.219244	0.754552	0.839679	0.965222	1	2568	tags=20%, list=15%, signal=23%
GO_ANTIGEN_RECEPTOR_MEDIATED_SIGNALING_PATHWAY	GO_ANTIGEN_RECEPTOR_MEDIATED_SIGNALING_PATHWAY		168	0.201407	0.754494	0.737154	0.964711	1	1988	tags=15%, list=11%, signal=17%
GO_RESPONSE_TO_METAL_ION	GO_RESPONSE_TO_METAL_ION		314	0.162423	0.754088	0.931313	0.964817	1	3527	tags=18%, list=20%, signal=23%
GO_ALCOHOL_METABOLIC_PROCESS	GO_ALCOHOL_METABOLIC_PROCESS		331	0.16529	0.753091	0.88664	0.965854	1	2782	tags=16%, list=16%, signal=19%
GO_TETRAPYRROLE_METABOLIC_PROCESS	GO_TETRAPYRROLE_METABOLIC_PROCESS		56	0.218445	0.752282	0.780347	0.966657	1	2616	tags=18%, list=15%, signal=21%
GO_REGULATION_OF_DEFENSE_RESPONSE_TO_VIRUS	GO_REGULATION_OF_DEFENSE_RESPONSE_TO_VIRUS		179	0.171002	0.75107	0.880392	0.968186	1	4680	tags=28%, list=27%, signal=38%
GO_HEART_PROCESS	GO_HEART_PROCESS		80	0.208774	0.751025	0.813705	0.967661	1	2227	tags=13%, list=13%, signal=14%
GO_CELL_SUBSTRATE_JUNCTION	GO_CELL_SUBSTRATE_JUNCTION		388	0.177892	0.75064	0.769384	0.967723	1	3146	tags=18%, list=18%, signal=22%
GO_SMALL_SUBUNIT_PROCESSOME	GO_SMALL_SUBUNIT_PROCESSOME		32	0.274329	0.749992	0.702381	0.968197	1	3950	tags=38%, list=22%, signal=48%
GO_PHAGOCYTIC_VESICLE_MEMBRANE	GO_PHAGOCYTIC_VESICLE_MEMBRANE		56	0.21798	0.74916	0.792961	0.968968	1	3621	tags=23%, list=21%, signal=29%
GO_GALACTOSYLTRANSFERASE_ACTIVITY	GO_GALACTOSYLTRANSFERASE_ACTIVITY		29	0.232025	0.749041	0.794118	0.968553	1	3734	tags=34%, list=21%, signal=44%
GO_CELLULAR_RESPONSE_TO_INORGANIC_SUBSTANCE	GO_CELLULAR_RESPONSE_TO_INORGANIC_SUBSTANCE		141	0.167151	0.748137	0.914683	0.969474	1	3646	tags=22%, list=21%, signal=27%
GO_OLIGOSACCHARIDE_METABOLIC_PROCESS	GO_OLIGOSACCHARIDE_METABOLIC_PROCESS		60	0.202369	0.747934	0.811024	0.969207	1	3695	tags=22%, list=21%, signal=27%
GO_PHOSPHATIDYLCHOLINE_ACYL_CHAIN_REMODELING	GO_PHOSPHATIDYLCHOLINE_ACYL_CHAIN_REMODELING		25	0.222493	0.747844	0.844581	0.968749	1	2568	tags=16%, list=15%, signal=19%
GO_NEGATIVE_REGULATION_OF_ION_TRANSPORT	GO_NEGATIVE_REGULATION_OF_ION_TRANSPORT		119	0.184074	0.747741	0.855984	0.968308	1	1731	tags=9%, list=10%, signal=10%
GO_NUCLEAR_TRANSCRIPTIONAL_REPRESSOR_COMPLEX	GO_NUCLEAR_TRANSCRIPTIONAL_REPRESSOR_COMPLEX		21	0.232762	0.745739	0.813627	0.971022	1	1898	tags=19%, list=11%, signal=21%
GO_REPRODUCTIVE_BEHAVIOR	GO_REPRODUCTIVE_BEHAVIOR		27	0.225621	0.744236	0.812741	0.97293	1	5193	tags=37%, list=29%, signal=52%
GO_REGULATION_OF_HAIR_CYCLE	GO_REGULATION_OF_HAIR_CYCLE		22	0.234128	0.744226	0.841797	0.972337	1	3599	tags=32%, list=20%, signal=40%
GO_CARDIAC_MUSCLE_CELL_DIFFERENTIATION	GO_CARDIAC_MUSCLE_CELL_DIFFERENTIATION		69	0.199067	0.743963	0.825203	0.972193	1	1762	tags=12%, list=10%, signal=13%
GO_REGULATION_OF_TYROSINE_PHOSPHORYLATION_OF_STAT3_PROTEIN	GO_REGULATION_OF_TYROSINE_PHOSPHORYLATION_OF_STAT3_PROTEIN		41	0.212674	0.74385	0.813906	0.971784	1	4586	tags=29%, list=26%, signal=39%
GO_NUCLEOSIDE_PHOSPHATE_BIOSYNTHETIC_PROCESS	GO_NUCLEOSIDE_PHOSPHATE_BIOSYNTHETIC_PROCESS		171	0.191877	0.74332	0.783784	0.97204	1	4261	tags=29%, list=24%, signal=37%
GO_GLYCOPROTEIN_BINDING	GO_GLYCOPROTEIN_BINDING		96	0.204088	0.743303	0.791339	0.97146	1	833	tags=8%, list=5%, signal=9%
GO_AXONEME_ASSEMBLY	GO_AXONEME_ASSEMBLY		34	0.246887	0.742274	0.751984	0.972565	1	5741	tags=35%, list=33%, signal=52%
GO_REPRODUCTIVE_SYSTEM_DEVELOPMENT	GO_REPRODUCTIVE_SYSTEM_DEVELOPMENT		379	0.155485	0.742124	0.9591	0.9722	1	3475	tags=17%, list=20%, signal=21%
GO_DENDRITIC_CELL_MIGRATION	GO_DENDRITIC_CELL_MIGRATION		20	0.286169	0.742039	0.760081	0.971749	1	2408	tags=20%, list=14%, signal=23%
GO_NUCLEOTIDE_EXCISION_REPAIR_DNA_GAP_FILLING	GO_NUCLEOTIDE_EXCISION_REPAIR_DNA_GAP_FILLING		24	0.267475	0.741826	0.739544	0.971487	1	4308	tags=46%, list=24%, signal=61%
GO_CELLULAR_MODIFIED_AMINO_ACID_BIOSYNTHETIC_PROCESS	GO_CELLULAR_MODIFIED_AMINO_ACID_BIOSYNTHETIC_PROCESS		49	0.219203	0.741704	0.805611	0.971059	1	2488	tags=18%, list=14%, signal=21%
GO_PSEUDOURIDINE_SYNTHESIS	GO_PSEUDOURIDINE_SYNTHESIS		17	0.316946	0.741545	0.743028	0.970724	1	1729	tags=24%, list=10%, signal=26%
GO_ESTABLISHMENT_OF_EPITHELIAL_CELL_POLARITY	GO_ESTABLISHMENT_OF_EPITHELIAL_CELL_POLARITY		22	0.236315	0.741107	0.805383	0.970824	1	1055	tags=14%, list=6%, signal=14%
GO_REGULATION_OF_ACTIVIN_RECEPTOR_SIGNALING_PATHWAY	GO_REGULATION_OF_ACTIVIN_RECEPTOR_SIGNALING_PATHWAY		25	0.235343	0.740926	0.828866	0.970522	1	1901	tags=16%, list=11%, signal=18%
GO_CYTOKINE_SECRETION	GO_CYTOKINE_SECRETION		37	0.242532	0.740782	0.742455	0.970178	1	1817	tags=14%, list=10%, signal=15%
GO_RELEASE_OF_CYTOCHROME_C_FROM_MITOCHONDRIA	GO_RELEASE_OF_CYTOCHROME_C_FROM_MITOCHONDRIA		22	0.248651	0.740751	0.798403	0.969614	1	1882	tags=14%, list=11%, signal=15%
GO_DIVALENT_INORGANIC_CATION_TRANSMEMBRANE_TRANSPORTER_ACTIVITY	GO_DIVALENT_INORGANIC_CATION_TRANSMEMBRANE_TRANSPORTER_ACTIVITY		157	0.189891	0.739543	0.860606	0.971002	1	2092	tags=12%, list=12%, signal=14%
GO_DNA_SECONDARY_STRUCTURE_BINDING	GO_DNA_SECONDARY_STRUCTURE_BINDING		24	0.281514	0.739225	0.730453	0.970942	1	4615	tags=46%, list=26%, signal=62%
GO_RETINOL_DEHYDROGENASE_ACTIVITY	GO_RETINOL_DEHYDROGENASE_ACTIVITY		16	0.271001	0.738883	0.770624	0.970893	1	12876	tags=100%, list=73%, signal=369%
GO_POSITIVE_REGULATION_OF_CELL_GROWTH	GO_POSITIVE_REGULATION_OF_CELL_GROWTH		141	0.172559	0.738772	0.920078	0.970472	1	4319	tags=26%, list=24%, signal=34%
GO_STRUCTURAL_CONSTITUENT_OF_CYTOSKELETON	GO_STRUCTURAL_CONSTITUENT_OF_CYTOSKELETON		94	0.194932	0.738432	0.870406	0.970452	1	1169	tags=10%, list=7%, signal=10%
GO_B_CELL_ACTIVATION_INVOLVED_IN_IMMUNE_RESPONSE	GO_B_CELL_ACTIVATION_INVOLVED_IN_IMMUNE_RESPONSE		34	0.208353	0.738102	0.842324	0.970376	1	3872	tags=26%, list=22%, signal=34%
GO_ALPHA_AMINO_ACID_CATABOLIC_PROCESS	GO_ALPHA_AMINO_ACID_CATABOLIC_PROCESS		89	0.185119	0.737658	0.867327	0.970504	1	2195	tags=12%, list=12%, signal=14%
GO_NEGATIVE_REGULATION_OF_DENDRITE_DEVELOPMENT	GO_NEGATIVE_REGULATION_OF_DENDRITE_DEVELOPMENT		27	0.21721	0.737546	0.826531	0.970071	1	1898	tags=15%, list=11%, signal=17%
GO_CARDIAC_MUSCLE_TISSUE_DEVELOPMENT	GO_CARDIAC_MUSCLE_TISSUE_DEVELOPMENT		131	0.186515	0.737271	0.84375	0.969908	1	2281	tags=14%, list=13%, signal=16%
GO_PALATE_DEVELOPMENT	GO_PALATE_DEVELOPMENT		84	0.200863	0.736888	0.826446	0.969927	1	3319	tags=19%, list=19%, signal=23%
GO_REGULATION_OF_SYNAPTIC_TRANSMISSION_GABAERGIC	GO_REGULATION_OF_SYNAPTIC_TRANSMISSION_GABAERGIC		28	0.239564	0.736484	0.822	0.969949	1	2953	tags=18%, list=17%, signal=21%
GO_REGULATION_OF_RECEPTOR_INTERNALIZATION	GO_REGULATION_OF_RECEPTOR_INTERNALIZATION		36	0.20657	0.73615	0.868687	0.969909	1	2943	tags=19%, list=17%, signal=23%
GO_AXONEMAL_DYNEIN_COMPLEX_ASSEMBLY	GO_AXONEMAL_DYNEIN_COMPLEX_ASSEMBLY		16	0.296735	0.734919	0.744318	0.971211	1	12422	tags=100%, list=70%, signal=337%
GO_GLYCINE_METABOLIC_PROCESS	GO_GLYCINE_METABOLIC_PROCESS		15	0.269743	0.734207	0.798434	0.971739	1	2645	tags=20%, list=15%, signal=24%
GO_POLYOL_TRANSPORT	GO_POLYOL_TRANSPORT		17	0.252585	0.733934	0.815261	0.971561	1	2415	tags=18%, list=14%, signal=20%
GO_MUSCLE_ADAPTATION	GO_MUSCLE_ADAPTATION		27	0.223561	0.733685	0.868217	0.971383	1	4258	tags=30%, list=24%, signal=39%
GO_REGULATION_OF_CELLULAR_AMINO_ACID_METABOLIC_PROCESS	GO_REGULATION_OF_CELLULAR_AMINO_ACID_METABOLIC_PROCESS		65	0.243326	0.733256	0.743191	0.971494	1	2040	tags=17%, list=12%, signal=19%
GO_SYNTAXIN_1_BINDING	GO_SYNTAXIN_1_BINDING		18	0.249628	0.731429	0.792776	0.973813	1	4951	tags=39%, list=28%, signal=54%
GO_REGULATION_OF_TOLL_LIKE_RECEPTOR_4_SIGNALING_PATHWAY	GO_REGULATION_OF_TOLL_LIKE_RECEPTOR_4_SIGNALING_PATHWAY		17	0.24551	0.731028	0.813253	0.973861	1	2765	tags=24%, list=16%, signal=28%
GO_REGULATION_OF_STEROID_METABOLIC_PROCESS	GO_REGULATION_OF_STEROID_METABOLIC_PROCESS		71	0.18014	0.730346	0.90297	0.974323	1	2686	tags=14%, list=15%, signal=17%
GO_REGULATION_OF_T_CELL_RECEPTOR_SIGNALING_PATHWAY	GO_REGULATION_OF_T_CELL_RECEPTOR_SIGNALING_PATHWAY		27	0.226331	0.72971	0.795322	0.974712	1	1667	tags=15%, list=9%, signal=16%
GO_NEGATIVE_REGULATION_OF_ANTIGEN_RECEPTOR_MEDIATED_SIGNALING_PATHWAY	GO_NEGATIVE_REGULATION_OF_ANTIGEN_RECEPTOR_MEDIATED_SIGNALING_PATHWAY		20	0.248829	0.728743	0.795181	0.975593	1	540	tags=10%, list=3%, signal=10%
GO_REGULATION_OF_DENDRITIC_SPINE_MORPHOGENESIS	GO_REGULATION_OF_DENDRITIC_SPINE_MORPHOGENESIS		30	0.221163	0.72852	0.826613	0.975357	1	1239	tags=10%, list=7%, signal=11%
GO_COFACTOR_BINDING	GO_COFACTOR_BINDING		244	0.169879	0.727585	0.848368	0.976288	1	3231	tags=19%, list=18%, signal=23%
GO_OVULATION	GO_OVULATION		17	0.255899	0.727153	0.84898	0.976351	1	5395	tags=41%, list=31%, signal=59%
GO_NUCLEOSIDE_PHOSPHATE_CATABOLIC_PROCESS	GO_NUCLEOSIDE_PHOSPHATE_CATABOLIC_PROCESS		67	0.178085	0.726602	0.896	0.97662	1	4966	tags=37%, list=28%, signal=52%
GO_M_BAND	GO_M_BAND		20	0.233354	0.726364	0.855159	0.976386	1	2750	tags=15%, list=16%, signal=18%
GO_SMALL_MOLECULE_CATABOLIC_PROCESS	GO_SMALL_MOLECULE_CATABOLIC_PROCESS		309	0.171072	0.725698	0.878669	0.976844	1	2285	tags=14%, list=13%, signal=16%
GO_REGULATION_OF_RESPONSE_TO_INTERFERON_GAMMA	GO_REGULATION_OF_RESPONSE_TO_INTERFERON_GAMMA		22	0.237177	0.72555	0.791583	0.976458	1	5055	tags=41%, list=29%, signal=57%
GO_REGULATION_OF_VASCULAR_ENDOTHELIAL_GROWTH_FACTOR_PRODUCTION	GO_REGULATION_OF_VASCULAR_ENDOTHELIAL_GROWTH_FACTOR_PRODUCTION		31	0.236559	0.725296	0.760994	0.976264	1	5524	tags=35%, list=31%, signal=52%
GO_NEGATIVE_REGULATION_OF_HEART_CONTRACTION	GO_NEGATIVE_REGULATION_OF_HEART_CONTRACTION		19	0.25155	0.724512	0.809917	0.976842	1	5128	tags=26%, list=29%, signal=37%
GO_BILE_ACID_METABOLIC_PROCESS	GO_BILE_ACID_METABOLIC_PROCESS		35	0.210041	0.724349	0.881874	0.976483	1	1974	tags=11%, list=11%, signal=13%
GO_SECRETORY_GRANULE	GO_SECRETORY_GRANULE		319	0.167014	0.723579	0.924335	0.977055	1	2609	tags=13%, list=15%, signal=14%
GO_NEGATIVE_REGULATION_OF_ACTIN_FILAMENT_POLYMERIZATION	GO_NEGATIVE_REGULATION_OF_ACTIN_FILAMENT_POLYMERIZATION		40	0.202985	0.723504	0.853061	0.976564	1	2750	tags=18%, list=16%, signal=21%
GO_REGULATION_OF_CARDIAC_MUSCLE_CONTRACTION	GO_REGULATION_OF_CARDIAC_MUSCLE_CONTRACTION		64	0.198093	0.722552	0.831068	0.977417	1	2227	tags=14%, list=13%, signal=16%
GO_NEGATIVE_REGULATION_OF_LEUKOCYTE_PROLIFERATION	GO_NEGATIVE_REGULATION_OF_LEUKOCYTE_PROLIFERATION		65	0.215839	0.722202	0.777555	0.977386	1	2116	tags=14%, list=12%, signal=16%
GO_PHOSPHOLIPASE_A2_ACTIVITY	GO_PHOSPHOLIPASE_A2_ACTIVITY		29	0.203249	0.721891	0.872299	0.977293	1	3586	tags=21%, list=20%, signal=26%
GO_SODIUM_CHANNEL_REGULATOR_ACTIVITY	GO_SODIUM_CHANNEL_REGULATOR_ACTIVITY		32	0.202833	0.72134	0.848361	0.977575	1	3616	tags=22%, list=20%, signal=27%
GO_B_CELL_HOMEOSTASIS	GO_B_CELL_HOMEOSTASIS		21	0.254198	0.721065	0.79798	0.977395	1	3310	tags=29%, list=19%, signal=35%
GO_RNA_POLYMERASE_ACTIVITY	GO_RNA_POLYMERASE_ACTIVITY		43	0.237258	0.720497	0.748031	0.977652	1	3766	tags=33%, list=21%, signal=41%
GO_CHROMOSOME_SEPARATION	GO_CHROMOSOME_SEPARATION		16	0.277469	0.720395	0.782961	0.977214	1	3732	tags=38%, list=21%, signal=48%
GO_POSITIVE_REGULATION_OF_SMOOTH_MUSCLE_CELL_PROLIFERATION	GO_POSITIVE_REGULATION_OF_SMOOTH_MUSCLE_CELL_PROLIFERATION		60	0.197855	0.719733	0.808333	0.977619	1	3355	tags=22%, list=19%, signal=27%
GO_MATING_BEHAVIOR	GO_MATING_BEHAVIOR		21	0.228383	0.719014	0.857143	0.97817	1	813	tags=10%, list=5%, signal=10%
GO_MRNA_CLEAVAGE	GO_MRNA_CLEAVAGE		17	0.258073	0.7188	0.776908	0.977911	1	4722	tags=47%, list=27%, signal=64%
GO_EPITHELIAL_TUBE_BRANCHING_INVOLVED_IN_LUNG_MORPHOGENESIS	GO_EPITHELIAL_TUBE_BRANCHING_INVOLVED_IN_LUNG_MORPHOGENESIS		25	0.231175	0.717704	0.835789	0.978932	1	3878	tags=24%, list=22%, signal=31%
GO_DNA_LIGATION	GO_DNA_LIGATION		16	0.273102	0.717508	0.803213	0.978638	1	2941	tags=25%, list=17%, signal=30%
GO_ESTABLISHMENT_OF_MITOTIC_SPINDLE_LOCALIZATION	GO_ESTABLISHMENT_OF_MITOTIC_SPINDLE_LOCALIZATION		23	0.233042	0.716789	0.822134	0.979048	1	4592	tags=35%, list=26%, signal=47%
GO_NCRNA_CATABOLIC_PROCESS	GO_NCRNA_CATABOLIC_PROCESS		22	0.243354	0.715949	0.794821	0.979696	1	1438	tags=14%, list=8%, signal=15%
GO_RRNA_BINDING	GO_RRNA_BINDING		54	0.27402	0.715947	0.726916	0.979111	1	4151	tags=30%, list=24%, signal=39%
GO_OLFACTORY_RECEPTOR_ACTIVITY	GO_OLFACTORY_RECEPTOR_ACTIVITY		24	0.26194	0.715686	0.813253	0.978915	1	11326	tags=96%, list=64%, signal=267%
GO_RESPONSE_TO_CADMIUM_ION	GO_RESPONSE_TO_CADMIUM_ION		38	0.213605	0.714826	0.835671	0.979586	1	480	tags=8%, list=3%, signal=8%
GO_HEAD_MORPHOGENESIS	GO_HEAD_MORPHOGENESIS		35	0.229321	0.714817	0.816872	0.979012	1	3967	tags=29%, list=22%, signal=37%
GO_REGULATION_OF_HEMOPOIESIS	GO_REGULATION_OF_HEMOPOIESIS		296	0.173208	0.714367	0.829615	0.979103	1	2953	tags=18%, list=17%, signal=21%
GO_MITOCHONDRIAL_RESPIRATORY_CHAIN_COMPLEX_ASSEMBLY	GO_MITOCHONDRIAL_RESPIRATORY_CHAIN_COMPLEX_ASSEMBLY		63	0.289763	0.713644	0.720703	0.979581	1	3940	tags=35%, list=22%, signal=45%
GO_PEPTIDE_CATABOLIC_PROCESS	GO_PEPTIDE_CATABOLIC_PROCESS		22	0.226344	0.713327	0.855422	0.979442	1	3828	tags=27%, list=22%, signal=35%
GO_NEGATIVE_REGULATION_OF_INTRACELLULAR_STEROID_HORMONE_RECEPTOR_SIGNALING_PATHWAY	GO_NEGATIVE_REGULATION_OF_INTRACELLULAR_STEROID_HORMONE_RECEPTOR_SIGNALING_PATHWAY		29	0.212931	0.713166	0.865462	0.979088	1	3599	tags=28%, list=20%, signal=35%
GO_LENS_FIBER_CELL_DIFFERENTIATION	GO_LENS_FIBER_CELL_DIFFERENTIATION		22	0.239238	0.713137	0.844758	0.978545	1	1997	tags=18%, list=11%, signal=20%
GO_RESPONSE_TO_ISCHEMIA	GO_RESPONSE_TO_ISCHEMIA		28	0.214371	0.712893	0.870079	0.978315	1	4923	tags=29%, list=28%, signal=40%
GO_TRNA_SPECIFIC_RIBONUCLEASE_ACTIVITY	GO_TRNA_SPECIFIC_RIBONUCLEASE_ACTIVITY		16	0.299267	0.712705	0.771484	0.977995	1	2248	tags=25%, list=13%, signal=29%
GO_REGULATION_OF_HISTONE_H3_K9_METHYLATION	GO_REGULATION_OF_HISTONE_H3_K9_METHYLATION		16	0.256564	0.712593	0.844	0.97757	1	2974	tags=25%, list=17%, signal=30%
GO_SYNAPTONEMAL_COMPLEX_ORGANIZATION	GO_SYNAPTONEMAL_COMPLEX_ORGANIZATION		17	0.236264	0.711995	0.861272	0.977845	1	35	tags=6%, list=0%, signal=6%
GO_TELENCEPHALON_DEVELOPMENT	GO_TELENCEPHALON_DEVELOPMENT		222	0.167604	0.711329	0.942857	0.978306	1	5193	tags=31%, list=29%, signal=43%
GO_EMBRYONIC_CAMERA_TYPE_EYE_MORPHOGENESIS	GO_EMBRYONIC_CAMERA_TYPE_EYE_MORPHOGENESIS		24	0.235364	0.711267	0.84879	0.977805	1	733	tags=8%, list=4%, signal=9%
GO_CELLULAR_RESPONSE_TO_VITAMIN	GO_CELLULAR_RESPONSE_TO_VITAMIN		25	0.242413	0.711056	0.821946	0.977529	1	1912	tags=16%, list=11%, signal=18%
GO_REGULATION_OF_CARBOHYDRATE_METABOLIC_PROCESS	GO_REGULATION_OF_CARBOHYDRATE_METABOLIC_PROCESS		154	0.159953	0.710868	0.958848	0.977196	1	3351	tags=18%, list=19%, signal=21%
GO_REGULATION_OF_B_CELL_PROLIFERATION	GO_REGULATION_OF_B_CELL_PROLIFERATION		53	0.217386	0.710575	0.801205	0.977069	1	1788	tags=13%, list=10%, signal=15%
GO_REGULATION_OF_MUSCLE_TISSUE_DEVELOPMENT	GO_REGULATION_OF_MUSCLE_TISSUE_DEVELOPMENT		95	0.188186	0.70987	0.857724	0.977516	1	4038	tags=21%, list=23%, signal=27%
GO_ESTROGEN_RECEPTOR_BINDING	GO_ESTROGEN_RECEPTOR_BINDING		37	0.195206	0.709488	0.875728	0.977503	1	5304	tags=43%, list=30%, signal=62%
GO_REGULATION_OF_EPITHELIAL_CELL_DIFFERENTIATION_INVOLVED_IN_KIDNEY_DEVELOPMENT	GO_REGULATION_OF_EPITHELIAL_CELL_DIFFERENTIATION_INVOLVED_IN_KIDNEY_DEVELOPMENT		15	0.256023	0.709484	0.815735	0.976931	1	4635	tags=33%, list=26%, signal=45%
GO_CEREBELLAR_CORTEX_MORPHOGENESIS	GO_CEREBELLAR_CORTEX_MORPHOGENESIS		30	0.224606	0.709478	0.859684	0.976357	1	5130	tags=40%, list=29%, signal=56%
GO_REGULATION_OF_SMAD_PROTEIN_IMPORT_INTO_NUCLEUS	GO_REGULATION_OF_SMAD_PROTEIN_IMPORT_INTO_NUCLEUS		16	0.246952	0.708688	0.814286	0.976928	1	1432	tags=13%, list=8%, signal=14%
GO_AMIDE_TRANSPORT	GO_AMIDE_TRANSPORT		89	0.179263	0.708045	0.939335	0.977225	1	1609	tags=10%, list=9%, signal=11%
GO_REGULATION_OF_TYPE_2_IMMUNE_RESPONSE	GO_REGULATION_OF_TYPE_2_IMMUNE_RESPONSE		23	0.255825	0.707481	0.797071	0.977474	1	707	tags=9%, list=4%, signal=9%
GO_VITAMIN_METABOLIC_PROCESS	GO_VITAMIN_METABOLIC_PROCESS		114	0.17042	0.707033	0.934701	0.977509	1	3161	tags=17%, list=18%, signal=20%
GO_DNA_POLYMERASE_ACTIVITY	GO_DNA_POLYMERASE_ACTIVITY		32	0.227047	0.705732	0.807692	0.978743	1	4880	tags=44%, list=28%, signal=60%
GO_FACE_DEVELOPMENT	GO_FACE_DEVELOPMENT		48	0.207375	0.70479	0.875	0.979452	1	3967	tags=27%, list=22%, signal=35%
GO_RESPONSE_TO_VITAMIN_E	GO_RESPONSE_TO_VITAMIN_E		15	0.233228	0.703979	0.877551	0.980006	1	1351	tags=13%, list=8%, signal=14%
GO_SMAD_BINDING	GO_SMAD_BINDING		69	0.192474	0.703377	0.85567	0.98025	1	3319	tags=22%, list=19%, signal=27%
GO_SEGMENTATION	GO_SEGMENTATION		84	0.170768	0.702907	0.950617	0.980299	1	3665	tags=20%, list=21%, signal=25%
GO_LUNG_EPITHELIUM_DEVELOPMENT	GO_LUNG_EPITHELIUM_DEVELOPMENT		34	0.195488	0.70128	0.9	0.982005	1	4413	tags=29%, list=25%, signal=39%
GO_CELLULAR_RESPONSE_TO_CALCIUM_ION	GO_CELLULAR_RESPONSE_TO_CALCIUM_ION		46	0.191661	0.701023	0.884696	0.981801	1	3468	tags=22%, list=20%, signal=27%
GO_SKIN_EPIDERMIS_DEVELOPMENT	GO_SKIN_EPIDERMIS_DEVELOPMENT		66	0.185164	0.700662	0.913215	0.981713	1	2849	tags=18%, list=16%, signal=22%
GO_FILOPODIUM	GO_FILOPODIUM		89	0.187146	0.70042	0.894	0.981462	1	4356	tags=25%, list=25%, signal=33%
GO_AMMONIUM_ION_METABOLIC_PROCESS	GO_AMMONIUM_ION_METABOLIC_PROCESS		159	0.156606	0.700381	0.965587	0.980944	1	2671	tags=14%, list=15%, signal=17%
GO_POSITIVE_REGULATION_OF_ACTIN_NUCLEATION	GO_POSITIVE_REGULATION_OF_ACTIN_NUCLEATION		16	0.2491	0.699595	0.857143	0.981424	1	5225	tags=38%, list=30%, signal=53%
GO_MUSCLE_TISSUE_DEVELOPMENT	GO_MUSCLE_TISSUE_DEVELOPMENT		251	0.171211	0.698911	0.91841	0.981796	1	1881	tags=11%, list=11%, signal=12%
GO_RNA_PHOSPHODIESTER_BOND_HYDROLYSIS_ENDONUCLEOLYTIC	GO_RNA_PHOSPHODIESTER_BOND_HYDROLYSIS_ENDONUCLEOLYTIC		54	0.215884	0.698842	0.800391	0.981313	1	3369	tags=24%, list=19%, signal=30%
GO_MESENCHYME_MORPHOGENESIS	GO_MESENCHYME_MORPHOGENESIS		38	0.224914	0.698264	0.833333	0.981507	1	1432	tags=13%, list=8%, signal=14%
GO_DIVALENT_INORGANIC_CATION_TRANSPORT	GO_DIVALENT_INORGANIC_CATION_TRANSPORT		247	0.173659	0.697647	0.906504	0.981772	1	2092	tags=11%, list=12%, signal=12%
GO_ENDOTHELIUM_DEVELOPMENT	GO_ENDOTHELIUM_DEVELOPMENT		88	0.192369	0.697603	0.837067	0.981254	1	2456	tags=17%, list=14%, signal=20%
GO_REGULATION_OF_ANTIGEN_RECEPTOR_MEDIATED_SIGNALING_PATHWAY	GO_REGULATION_OF_ANTIGEN_RECEPTOR_MEDIATED_SIGNALING_PATHWAY		38	0.223927	0.697284	0.801158	0.981086	1	1667	tags=13%, list=9%, signal=14%
GO_NEGATIVE_REGULATION_OF_ALCOHOL_BIOSYNTHETIC_PROCESS	GO_NEGATIVE_REGULATION_OF_ALCOHOL_BIOSYNTHETIC_PROCESS		17	0.241811	0.694677	0.841393	0.984014	1	2369	tags=18%, list=13%, signal=20%
GO_QUATERNARY_AMMONIUM_GROUP_BINDING	GO_QUATERNARY_AMMONIUM_GROUP_BINDING		45	0.215054	0.694547	0.882353	0.98361	1	6208	tags=47%, list=35%, signal=72%
GO_FOREBRAIN_REGIONALIZATION	GO_FOREBRAIN_REGIONALIZATION		23	0.216768	0.694348	0.893443	0.983291	1	2064	tags=13%, list=12%, signal=15%
GO_ANTIGEN_PROCESSING_AND_PRESENTATION_VIA_MHC_CLASS_IB	GO_ANTIGEN_PROCESSING_AND_PRESENTATION_VIA_MHC_CLASS_IB		15	0.27335	0.693169	0.820359	0.984257	1	128	tags=7%, list=1%, signal=7%
GO_ORGANELLE_ENVELOPE_LUMEN	GO_ORGANELLE_ENVELOPE_LUMEN		73	0.213839	0.693086	0.781746	0.983812	1	4498	tags=30%, list=25%, signal=40%
GO_RESPONSE_TO_EPINEPHRINE	GO_RESPONSE_TO_EPINEPHRINE		16	0.247891	0.692998	0.869121	0.983354	1	2686	tags=19%, list=15%, signal=22%
GO_REGULATION_OF_INNATE_IMMUNE_RESPONSE	GO_REGULATION_OF_INNATE_IMMUNE_RESPONSE		331	0.171908	0.692068	0.849287	0.983969	1	4147	tags=24%, list=23%, signal=30%
GO_FILAMENTOUS_ACTIN	GO_FILAMENTOUS_ACTIN		19	0.230338	0.689665	0.882474	0.986462	1	2054	tags=16%, list=12%, signal=18%
GO_SYNAPSIS	GO_SYNAPSIS		26	0.220852	0.68923	0.872727	0.98644	1	6015	tags=42%, list=34%, signal=64%
GO_NEGATIVE_REGULATION_OF_RECEPTOR_MEDIATED_ENDOCYTOSIS	GO_NEGATIVE_REGULATION_OF_RECEPTOR_MEDIATED_ENDOCYTOSIS		17	0.225764	0.688973	0.897436	0.986174	1	2943	tags=24%, list=17%, signal=28%
GO_RUFFLE_MEMBRANE	GO_RUFFLE_MEMBRANE		77	0.183823	0.688676	0.870564	0.986003	1	2058	tags=14%, list=12%, signal=16%
GO_CHROMOSOME_CONDENSATION	GO_CHROMOSOME_CONDENSATION		24	0.268514	0.688533	0.756972	0.985618	1	2941	tags=29%, list=17%, signal=35%
GO_NEGATIVE_REGULATION_OF_CARBOHYDRATE_METABOLIC_PROCESS	GO_NEGATIVE_REGULATION_OF_CARBOHYDRATE_METABOLIC_PROCESS		46	0.195005	0.688175	0.906067	0.985511	1	3351	tags=20%, list=19%, signal=24%
GO_ALDITOL_METABOLIC_PROCESS	GO_ALDITOL_METABOLIC_PROCESS		18	0.241401	0.688017	0.871541	0.985144	1	4070	tags=39%, list=23%, signal=50%
GO_NEGATIVE_REGULATION_OF_BLOOD_CIRCULATION	GO_NEGATIVE_REGULATION_OF_BLOOD_CIRCULATION		33	0.219078	0.687609	0.847251	0.985103	1	5128	tags=27%, list=29%, signal=38%
GO_REGULATION_OF_ENERGY_HOMEOSTASIS	GO_REGULATION_OF_ENERGY_HOMEOSTASIS		17	0.240106	0.687545	0.861702	0.984614	1	2686	tags=24%, list=15%, signal=28%
GO_HYALURONIC_ACID_BINDING	GO_HYALURONIC_ACID_BINDING		20	0.244667	0.687057	0.851351	0.984651	1	3591	tags=20%, list=20%, signal=25%
GO_LIPID_DIGESTION	GO_LIPID_DIGESTION		20	0.235004	0.686556	0.866541	0.984712	1	13512	tags=100%, list=77%, signal=425%
GO_REGULATION_OF_DELAYED_RECTIFIER_POTASSIUM_CHANNEL_ACTIVITY	GO_REGULATION_OF_DELAYED_RECTIFIER_POTASSIUM_CHANNEL_ACTIVITY		17	0.233187	0.686449	0.874502	0.984284	1	4939	tags=41%, list=28%, signal=57%
GO_OVULATION_CYCLE_PROCESS	GO_OVULATION_CYCLE_PROCESS		80	0.171399	0.6845	0.933333	0.986188	1	2604	tags=14%, list=15%, signal=16%
GO_DICARBOXYLIC_ACID_CATABOLIC_PROCESS	GO_DICARBOXYLIC_ACID_CATABOLIC_PROCESS		16	0.23645	0.684436	0.877264	0.985677	1	221	tags=6%, list=1%, signal=6%
GO_REGULATION_OF_RESPONSE_TO_FOOD	GO_REGULATION_OF_RESPONSE_TO_FOOD		16	0.236714	0.681844	0.907975	0.988455	1	4329	tags=25%, list=25%, signal=33%
GO_SENSORY_PERCEPTION_OF_TASTE	GO_SENSORY_PERCEPTION_OF_TASTE		46	0.212417	0.678896	0.843058	0.991458	1	3704	tags=24%, list=21%, signal=30%
GO_ESTABLISHMENT_OF_TISSUE_POLARITY	GO_ESTABLISHMENT_OF_TISSUE_POLARITY		17	0.234407	0.678571	0.890688	0.991254	1	4197	tags=29%, list=24%, signal=39%
GO_COMPLEMENT_BINDING	GO_COMPLEMENT_BINDING		17	0.248339	0.677585	0.852295	0.991896	1	160	tags=6%, list=1%, signal=6%
GO_CELL_CELL_RECOGNITION	GO_CELL_CELL_RECOGNITION		52	0.18543	0.676251	0.927757	0.992923	1	4731	tags=25%, list=27%, signal=34%
GO_COA_HYDROLASE_ACTIVITY	GO_COA_HYDROLASE_ACTIVITY		18	0.234711	0.67602	0.872	0.992625	1	898	tags=11%, list=5%, signal=12%
GO_NEURAL_RETINA_DEVELOPMENT	GO_NEURAL_RETINA_DEVELOPMENT		49	0.203132	0.675791	0.92	0.99231	1	2672	tags=14%, list=15%, signal=17%
GO_POSITIVE_REGULATION_OF_CALCIUM_ION_TRANSMEMBRANE_TRANSPORTER_ACTIVITY	GO_POSITIVE_REGULATION_OF_CALCIUM_ION_TRANSMEMBRANE_TRANSPORTER_ACTIVITY		30	0.206741	0.675322	0.883495	0.992306	1	3246	tags=20%, list=18%, signal=24%
GO_MITOCHONDRIAL_RESPIRATORY_CHAIN_COMPLEX_I_BIOGENESIS	GO_MITOCHONDRIAL_RESPIRATORY_CHAIN_COMPLEX_I_BIOGENESIS		51	0.283814	0.673685	0.739884	0.993658	1	3273	tags=29%, list=19%, signal=36%
GO_OSTEOBLAST_DIFFERENTIATION	GO_OSTEOBLAST_DIFFERENTIATION		123	0.162628	0.673184	0.925049	0.993693	1	3483	tags=19%, list=20%, signal=23%
GO_CEREBRAL_CORTEX_CELL_MIGRATION	GO_CEREBRAL_CORTEX_CELL_MIGRATION		40	0.206592	0.672799	0.902439	0.993568	1	4772	tags=33%, list=27%, signal=44%
GO_AMELOGENESIS	GO_AMELOGENESIS		19	0.227345	0.672797	0.884536	0.993	1	3368	tags=26%, list=19%, signal=32%
GO_INNER_MITOCHONDRIAL_MEMBRANE_ORGANIZATION	GO_INNER_MITOCHONDRIAL_MEMBRANE_ORGANIZATION		16	0.278232	0.672595	0.790927	0.992656	1	3619	tags=38%, list=20%, signal=47%
GO_REGULATION_OF_CELL_MATURATION	GO_REGULATION_OF_CELL_MATURATION		18	0.2113	0.672401	0.916836	0.992335	1	2472	tags=17%, list=14%, signal=19%
GO_REGULATION_OF_T_CELL_MEDIATED_CYTOTOXICITY	GO_REGULATION_OF_T_CELL_MEDIATED_CYTOTOXICITY		22	0.238748	0.672087	0.830303	0.992129	1	1926	tags=14%, list=11%, signal=15%
GO_SIGNAL_TRANSDUCTION_INVOLVED_IN_REGULATION_OF_GENE_EXPRESSION	GO_SIGNAL_TRANSDUCTION_INVOLVED_IN_REGULATION_OF_GENE_EXPRESSION		18	0.242709	0.671921	0.920086	0.991755	1	3368	tags=22%, list=19%, signal=27%
GO_PHOSPHATIDYLINOSITOL_4_5_BISPHOSPHATE_BINDING	GO_PHOSPHATIDYLINOSITOL_4_5_BISPHOSPHATE_BINDING		46	0.177656	0.670959	0.940574	0.992341	1	4709	tags=28%, list=27%, signal=38%
GO_SOMATIC_STEM_CELL_DIVISION	GO_SOMATIC_STEM_CELL_DIVISION		22	0.221868	0.670173	0.895616	0.992676	1	2275	tags=14%, list=13%, signal=16%
GO_POSITIVE_REGULATION_OF_RESPONSE_TO_BIOTIC_STIMULUS	GO_POSITIVE_REGULATION_OF_RESPONSE_TO_BIOTIC_STIMULUS		36	0.197615	0.670159	0.872	0.992124	1	4981	tags=31%, list=28%, signal=42%
GO_ACETYLGALACTOSAMINYLTRANSFERASE_ACTIVITY	GO_ACETYLGALACTOSAMINYLTRANSFERASE_ACTIVITY		31	0.212989	0.670115	0.872047	0.991604	1	5176	tags=35%, list=29%, signal=50%
GO_UTERUS_DEVELOPMENT	GO_UTERUS_DEVELOPMENT		18	0.234557	0.666696	0.888438	0.994946	1	3831	tags=28%, list=22%, signal=35%
GO_REGULATION_OF_PATHWAY_RESTRICTED_SMAD_PROTEIN_PHOSPHORYLATION	GO_REGULATION_OF_PATHWAY_RESTRICTED_SMAD_PROTEIN_PHOSPHORYLATION		55	0.182187	0.664702	0.945344	0.996589	1	3725	tags=22%, list=21%, signal=28%
GO_EXOCYTIC_VESICLE	GO_EXOCYTIC_VESICLE		138	0.167071	0.664263	0.954733	0.996519	1	1208	tags=8%, list=7%, signal=8%
GO_POSITIVE_REGULATION_OF_WOUND_HEALING	GO_POSITIVE_REGULATION_OF_WOUND_HEALING		45	0.188538	0.664075	0.931313	0.996179	1	2769	tags=13%, list=16%, signal=16%
GO_REGULATION_OF_STEM_CELL_DIFFERENTIATION	GO_REGULATION_OF_STEM_CELL_DIFFERENTIATION		108	0.161753	0.662908	0.942801	0.996933	1	2604	tags=13%, list=15%, signal=15%
GO_OOGENESIS	GO_OOGENESIS		55	0.172181	0.662288	0.948665	0.997063	1	3646	tags=20%, list=21%, signal=25%
GO_RESPONSE_TO_TEMPERATURE_STIMULUS	GO_RESPONSE_TO_TEMPERATURE_STIMULUS		138	0.153468	0.661586	0.982283	0.997271	1	3181	tags=14%, list=18%, signal=18%
GO_NEGATIVE_REGULATION_OF_LIPID_STORAGE	GO_NEGATIVE_REGULATION_OF_LIPID_STORAGE		17	0.238853	0.661298	0.880503	0.997033	1	3351	tags=29%, list=19%, signal=36%
GO_GLYCOSIDE_METABOLIC_PROCESS	GO_GLYCOSIDE_METABOLIC_PROCESS		15	0.25047	0.661158	0.858546	0.996628	1	1637	tags=13%, list=9%, signal=15%
GO_POSITIVE_REGULATION_OF_DEFENSE_RESPONSE	GO_POSITIVE_REGULATION_OF_DEFENSE_RESPONSE		351	0.162442	0.660322	0.89703	0.996988	1	4179	tags=22%, list=24%, signal=28%
GO_SPINDLE_MIDZONE	GO_SPINDLE_MIDZONE		25	0.214426	0.660265	0.886719	0.996489	1	3059	tags=24%, list=17%, signal=29%
GO_HETEROTYPIC_CELL_CELL_ADHESION	GO_HETEROTYPIC_CELL_CELL_ADHESION		27	0.237226	0.660232	0.861167	0.995959	1	2837	tags=22%, list=16%, signal=26%
GO_SECRETORY_VESICLE	GO_SECRETORY_VESICLE		425	0.149945	0.659394	0.981595	0.996304	1	2609	tags=12%, list=15%, signal=13%
GO_NEGATIVE_REGULATION_OF_ADAPTIVE_IMMUNE_RESPONSE	GO_NEGATIVE_REGULATION_OF_ADAPTIVE_IMMUNE_RESPONSE		33	0.222872	0.659354	0.848	0.995779	1	955	tags=9%, list=5%, signal=10%
GO_TRANSLATION_INITIATION_FACTOR_BINDING	GO_TRANSLATION_INITIATION_FACTOR_BINDING		27	0.214983	0.65818	0.860511	0.996444	1	1392	tags=15%, list=8%, signal=16%
GO_SOMITE_DEVELOPMENT	GO_SOMITE_DEVELOPMENT		73	0.167969	0.657731	0.97556	0.996377	1	3654	tags=19%, list=21%, signal=24%
GO_MONOVALENT_INORGANIC_CATION_TRANSPORT	GO_MONOVALENT_INORGANIC_CATION_TRANSPORT		399	0.150522	0.657107	0.981781	0.99649	1	3506	tags=16%, list=20%, signal=19%
GO_MACROMOLECULE_TRANSMEMBRANE_TRANSPORTER_ACTIVITY	GO_MACROMOLECULE_TRANSMEMBRANE_TRANSPORTER_ACTIVITY		20	0.227556	0.652601	0.907692	1	1	1670	tags=15%, list=9%, signal=17%
GO_CELLULAR_RESPONSE_TO_INTERLEUKIN_6	GO_CELLULAR_RESPONSE_TO_INTERLEUKIN_6		22	0.21072	0.651383	0.912779	1	1	3512	tags=27%, list=20%, signal=34%
GO_CALCIUM_CHANNEL_COMPLEX	GO_CALCIUM_CHANNEL_COMPLEX		54	0.195419	0.65136	0.917836	1	1	5021	tags=26%, list=28%, signal=36%
GO_OXIDOREDUCTION_COENZYME_METABOLIC_PROCESS	GO_OXIDOREDUCTION_COENZYME_METABOLIC_PROCESS		95	0.193283	0.650095	0.857955	1	1	2916	tags=20%, list=17%, signal=24%
GO_PHOTORECEPTOR_CELL_DEVELOPMENT	GO_PHOTORECEPTOR_CELL_DEVELOPMENT		36	0.188425	0.649826	0.936047	1	1	3743	tags=22%, list=21%, signal=28%
GO_CALCIUM_DEPENDENT_PHOSPHOLIPID_BINDING	GO_CALCIUM_DEPENDENT_PHOSPHOLIPID_BINDING		53	0.189372	0.648842	0.939759	1	1	5265	tags=30%, list=30%, signal=43%
GO_APICAL_PART_OF_CELL	GO_APICAL_PART_OF_CELL		340	0.14361	0.647126	0.984314	1	1	3276	tags=15%, list=19%, signal=18%
GO_FORELIMB_MORPHOGENESIS	GO_FORELIMB_MORPHOGENESIS		38	0.19885	0.646382	0.939394	1	1	3646	tags=21%, list=21%, signal=26%
GO_PYRIMIDINE_CONTAINING_COMPOUND_METABOLIC_PROCESS	GO_PYRIMIDINE_CONTAINING_COMPOUND_METABOLIC_PROCESS		70	0.175677	0.646374	0.953908	1	1	3721	tags=23%, list=21%, signal=29%
GO_CYCLIC_NUCLEOTIDE_PHOSPHODIESTERASE_ACTIVITY	GO_CYCLIC_NUCLEOTIDE_PHOSPHODIESTERASE_ACTIVITY		24	0.220243	0.646317	0.888438	1	1	4966	tags=38%, list=28%, signal=52%
GO_REGULATION_OF_ACTIVATED_T_CELL_PROLIFERATION	GO_REGULATION_OF_ACTIVATED_T_CELL_PROLIFERATION		39	0.193276	0.644385	0.873469	1	1	1926	tags=13%, list=11%, signal=14%
GO_REGULATION_OF_MUSCLE_CELL_APOPTOTIC_PROCESS	GO_REGULATION_OF_MUSCLE_CELL_APOPTOTIC_PROCESS		42	0.174888	0.643802	0.944099	1	1	2681	tags=14%, list=15%, signal=17%
GO_MYOBLAST_FUSION	GO_MYOBLAST_FUSION		17	0.241629	0.643436	0.878788	1	1	1602	tags=12%, list=9%, signal=13%
GO_LIMBIC_SYSTEM_DEVELOPMENT	GO_LIMBIC_SYSTEM_DEVELOPMENT		91	0.166222	0.64277	0.969697	1	1	5253	tags=31%, list=30%, signal=44%
GO_MODIFIED_AMINO_ACID_TRANSMEMBRANE_TRANSPORTER_ACTIVITY	GO_MODIFIED_AMINO_ACID_TRANSMEMBRANE_TRANSPORTER_ACTIVITY		16	0.210769	0.641823	0.945148	1	1	1915	tags=13%, list=11%, signal=14%
GO_O_GLYCAN_PROCESSING	GO_O_GLYCAN_PROCESSING		54	0.18771	0.640249	0.908911	1	1	4511	tags=24%, list=26%, signal=32%
GO_CARBOHYDRATE_TRANSPORTER_ACTIVITY	GO_CARBOHYDRATE_TRANSPORTER_ACTIVITY		43	0.177476	0.639817	0.941065	1	1	975	tags=7%, list=6%, signal=7%
GO_MEMBRANE_PROTEIN_INTRACELLULAR_DOMAIN_PROTEOLYSIS	GO_MEMBRANE_PROTEIN_INTRACELLULAR_DOMAIN_PROTEOLYSIS		16	0.219065	0.639667	0.897384	1	1	4472	tags=44%, list=25%, signal=59%
GO_FEAR_RESPONSE	GO_FEAR_RESPONSE		26	0.200047	0.63898	0.936735	1	1	3945	tags=23%, list=22%, signal=30%
GO_OXIDOREDUCTASE_ACTIVITY_ACTING_ON_CH_OH_GROUP_OF_DONORS	GO_OXIDOREDUCTASE_ACTIVITY_ACTING_ON_CH_OH_GROUP_OF_DONORS		128	0.166616	0.638904	0.943775	1	1	5080	tags=30%, list=29%, signal=42%
GO_APICAL_PLASMA_MEMBRANE	GO_APICAL_PLASMA_MEMBRANE		277	0.145738	0.6351	0.986381	1	1	3058	tags=13%, list=17%, signal=16%
GO_CELLULAR_RESPONSE_TO_HEAT	GO_CELLULAR_RESPONSE_TO_HEAT		33	0.183944	0.633272	0.951613	1	1	1931	tags=12%, list=11%, signal=14%
GO_INTERMEDIATE_FILAMENT_ORGANIZATION	GO_INTERMEDIATE_FILAMENT_ORGANIZATION		18	0.238101	0.63315	0.911885	1	1	4548	tags=22%, list=26%, signal=30%
GO_PROTEASOME_ACCESSORY_COMPLEX	GO_PROTEASOME_ACCESSORY_COMPLEX		23	0.266544	0.632763	0.816764	1	1	1961	tags=22%, list=11%, signal=24%
GO_GLYCOSYL_COMPOUND_CATABOLIC_PROCESS	GO_GLYCOSYL_COMPOUND_CATABOLIC_PROCESS		38	0.188821	0.631455	0.946939	1	1	164	tags=5%, list=1%, signal=5%
GO_ORGANIC_HYDROXY_COMPOUND_TRANSMEMBRANE_TRANSPORTER_ACTIVITY	GO_ORGANIC_HYDROXY_COMPOUND_TRANSMEMBRANE_TRANSPORTER_ACTIVITY		59	0.169371	0.630189	0.964637	1	1	5490	tags=32%, list=31%, signal=47%
GO_EYE_PHOTORECEPTOR_CELL_DEVELOPMENT	GO_EYE_PHOTORECEPTOR_CELL_DEVELOPMENT		28	0.192025	0.629591	0.950787	1	1	2874	tags=18%, list=16%, signal=21%
GO_VIRUS_RECEPTOR_ACTIVITY	GO_VIRUS_RECEPTOR_ACTIVITY		63	0.181458	0.629319	0.926078	1	1	1670	tags=11%, list=9%, signal=12%
GO_CYTOCHROME_COMPLEX	GO_CYTOCHROME_COMPLEX		19	0.273867	0.628651	0.849594	1	1	5154	tags=47%, list=29%, signal=67%
GO_PHOSPHATIDYLINOSITOL_3_KINASE_ACTIVITY	GO_PHOSPHATIDYLINOSITOL_3_KINASE_ACTIVITY		68	0.182456	0.628439	0.930612	1	1	5829	tags=34%, list=33%, signal=50%
GO_SYNAPTIC_VESICLE_LOCALIZATION	GO_SYNAPTIC_VESICLE_LOCALIZATION		99	0.167146	0.628146	0.952286	1	1	1441	tags=8%, list=8%, signal=9%
GO_PROTEIN_TYROSINE_KINASE_BINDING	GO_PROTEIN_TYROSINE_KINASE_BINDING		52	0.166736	0.628021	0.972458	1	1	5601	tags=37%, list=32%, signal=53%
GO_GLUTATHIONE_METABOLIC_PROCESS	GO_GLUTATHIONE_METABOLIC_PROCESS		52	0.180465	0.628004	0.938247	1	1	3660	tags=25%, list=21%, signal=31%
GO_SPLEEN_DEVELOPMENT	GO_SPLEEN_DEVELOPMENT		38	0.172828	0.627993	0.950644	1	1	4985	tags=37%, list=28%, signal=51%
GO_MUSCLE_CELL_DEVELOPMENT	GO_MUSCLE_CELL_DEVELOPMENT		112	0.166919	0.62662	0.9499	1	1	1838	tags=11%, list=10%, signal=12%
GO_NCRNA_3_END_PROCESSING	GO_NCRNA_3_END_PROCESSING		20	0.251752	0.625331	0.823183	1	1	1657	tags=20%, list=9%, signal=22%
GO_BODY_FLUID_SECRETION	GO_BODY_FLUID_SECRETION		64	0.15631	0.624757	0.981707	1	1	3310	tags=17%, list=19%, signal=21%
GO_FLAVONOID_METABOLIC_PROCESS	GO_FLAVONOID_METABOLIC_PROCESS		26	0.227175	0.624221	0.898239	1	1	6292	tags=46%, list=36%, signal=72%
GO_POSITIVE_REGULATION_OF_TISSUE_REMODELING	GO_POSITIVE_REGULATION_OF_TISSUE_REMODELING		22	0.199913	0.623382	0.938	1	1	4225	tags=27%, list=24%, signal=36%
GO_POSITIVE_REGULATION_OF_INTERLEUKIN_12_PRODUCTION	GO_POSITIVE_REGULATION_OF_INTERLEUKIN_12_PRODUCTION		33	0.193122	0.622892	0.93361	1	1	1926	tags=15%, list=11%, signal=17%
GO_PRECATALYTIC_SPLICEOSOME	GO_PRECATALYTIC_SPLICEOSOME		21	0.253948	0.621482	0.826004	1	1	1572	tags=19%, list=9%, signal=21%
GO_REGULATION_OF_CELLULAR_AMINE_METABOLIC_PROCESS	GO_REGULATION_OF_CELLULAR_AMINE_METABOLIC_PROCESS		85	0.184894	0.62103	0.88668	1	1	2040	tags=14%, list=12%, signal=16%
GO_POSITIVE_REGULATION_OF_NUCLEOSIDE_METABOLIC_PROCESS	GO_POSITIVE_REGULATION_OF_NUCLEOSIDE_METABOLIC_PROCESS		21	0.202587	0.619793	0.923395	1	1	101	tags=5%, list=1%, signal=5%
GO_REFLEX	GO_REFLEX		18	0.230442	0.619623	0.892178	1	1	13592	tags=100%, list=77%, signal=434%
GO_PEPTIDE_TRANSPORT	GO_PEPTIDE_TRANSPORT		66	0.171708	0.619378	0.954545	1	1	1609	tags=9%, list=9%, signal=10%
GO_BODY_MORPHOGENESIS	GO_BODY_MORPHOGENESIS		43	0.189049	0.619166	0.921529	1	1	3967	tags=26%, list=22%, signal=33%
GO_LYMPHOCYTE_ACTIVATION_INVOLVED_IN_IMMUNE_RESPONSE	GO_LYMPHOCYTE_ACTIVATION_INVOLVED_IN_IMMUNE_RESPONSE		81	0.174251	0.618762	0.915811	1	1	3627	tags=21%, list=21%, signal=26%
GO_POLYSACCHARIDE_BINDING	GO_POLYSACCHARIDE_BINDING		19	0.205351	0.618053	0.919517	1	1	3229	tags=21%, list=18%, signal=26%
GO_PHASIC_SMOOTH_MUSCLE_CONTRACTION	GO_PHASIC_SMOOTH_MUSCLE_CONTRACTION		16	0.230875	0.618033	0.900212	1	1	606	tags=6%, list=3%, signal=6%
GO_PHOSPHATIDYLSERINE_ACYL_CHAIN_REMODELING	GO_PHOSPHATIDYLSERINE_ACYL_CHAIN_REMODELING		16	0.211881	0.615512	0.929607	1	1	13919	tags=100%, list=79%, signal=472%
GO_GENETIC_IMPRINTING	GO_GENETIC_IMPRINTING		19	0.200476	0.614919	0.946215	1	1	3455	tags=26%, list=20%, signal=33%
GO_DRUG_BINDING	GO_DRUG_BINDING		102	0.145849	0.614025	0.982178	1	1	3351	tags=16%, list=19%, signal=19%
GO_CELLULAR_RESPONSE_TO_CORTICOSTEROID_STIMULUS	GO_CELLULAR_RESPONSE_TO_CORTICOSTEROID_STIMULUS		53	0.164487	0.612005	0.955078	1	1	5712	tags=34%, list=32%, signal=50%
GO_FEEDING_BEHAVIOR	GO_FEEDING_BEHAVIOR		80	0.161383	0.611962	0.970414	1	1	3006	tags=13%, list=17%, signal=15%
GO_DETECTION_OF_STIMULUS	GO_DETECTION_OF_STIMULUS		239	0.147603	0.611659	0.992032	1	1	4747	tags=24%, list=27%, signal=32%
GO_NONMOTILE_PRIMARY_CILIUM	GO_NONMOTILE_PRIMARY_CILIUM		119	0.15278	0.611512	0.983838	1	1	3809	tags=20%, list=22%, signal=26%
GO_POTASSIUM_ION_HOMEOSTASIS	GO_POTASSIUM_ION_HOMEOSTASIS		17	0.226186	0.61028	0.917695	1	1	1834	tags=12%, list=10%, signal=13%
GO_CELLULAR_RESPONSE_TO_ALCOHOL	GO_CELLULAR_RESPONSE_TO_ALCOHOL		107	0.150167	0.610123	0.98994	1	1	4252	tags=23%, list=24%, signal=31%
GO_CENTRIOLE_ASSEMBLY	GO_CENTRIOLE_ASSEMBLY		18	0.237457	0.610074	0.832692	1	1	5070	tags=56%, list=29%, signal=78%
GO_SYMPORTER_ACTIVITY	GO_SYMPORTER_ACTIVITY		135	0.152634	0.608128	0.990177	1	1	2607	tags=12%, list=15%, signal=14%
GO_STRIATUM_DEVELOPMENT	GO_STRIATUM_DEVELOPMENT		16	0.20232	0.606279	0.93159	1	1	6081	tags=56%, list=34%, signal=86%
GO_POSITIVE_REGULATION_OF_T_CELL_MEDIATED_CYTOTOXICITY	GO_POSITIVE_REGULATION_OF_T_CELL_MEDIATED_CYTOTOXICITY		15	0.232854	0.606118	0.88501	1	1	3257	tags=20%, list=18%, signal=25%
GO_MALE_GENITALIA_DEVELOPMENT	GO_MALE_GENITALIA_DEVELOPMENT		21	0.19157	0.605838	0.962	1	1	6564	tags=52%, list=37%, signal=83%
GO_NEGATIVE_REGULATION_OF_LYMPHOCYTE_MEDIATED_IMMUNITY	GO_NEGATIVE_REGULATION_OF_LYMPHOCYTE_MEDIATED_IMMUNITY		33	0.207664	0.605574	0.896282	1	1	357	tags=6%, list=2%, signal=6%
GO_REGULATION_OF_INTERLEUKIN_8_SECRETION	GO_REGULATION_OF_INTERLEUKIN_8_SECRETION		17	0.217959	0.604757	0.902111	1	1	2208	tags=18%, list=13%, signal=20%
GO_CELL_COMMUNICATION_BY_ELECTRICAL_COUPLING	GO_CELL_COMMUNICATION_BY_ELECTRICAL_COUPLING		15	0.233182	0.603417	0.884615	1	1	2227	tags=13%, list=13%, signal=15%
GO_PITUITARY_GLAND_DEVELOPMENT	GO_PITUITARY_GLAND_DEVELOPMENT		39	0.183465	0.603224	0.971717	1	1	1181	tags=8%, list=7%, signal=8%
GO_SPLICEOSOMAL_SNRNP_ASSEMBLY	GO_SPLICEOSOMAL_SNRNP_ASSEMBLY		37	0.218487	0.60263	0.864971	1	1	4439	tags=35%, list=25%, signal=47%
GO_NEGATIVE_REGULATION_OF_SYNAPTIC_TRANSMISSION	GO_NEGATIVE_REGULATION_OF_SYNAPTIC_TRANSMISSION		59	0.166575	0.598932	0.971134	1	1	1208	tags=8%, list=7%, signal=9%
GO_LEADING_EDGE_MEMBRANE	GO_LEADING_EDGE_MEMBRANE		128	0.149242	0.597185	0.977459	1	1	2058	tags=11%, list=12%, signal=12%
GO_CALCIUM_DEPENDENT_PROTEIN_BINDING	GO_CALCIUM_DEPENDENT_PROTEIN_BINDING		56	0.167797	0.596585	0.983573	1	1	3079	tags=14%, list=17%, signal=17%
GO_EPITHELIAL_CELL_DIFFERENTIATION	GO_EPITHELIAL_CELL_DIFFERENTIATION		453	0.134976	0.595887	1	1	1	3646	tags=17%, list=21%, signal=21%
GO_RIBONUCLEOSIDE_TRIPHOSPHATE_BIOSYNTHETIC_PROCESS	GO_RIBONUCLEOSIDE_TRIPHOSPHATE_BIOSYNTHETIC_PROCESS		44	0.216935	0.594397	0.848126	1	1	4240	tags=32%, list=24%, signal=42%
GO_SENSORY_PERCEPTION_OF_MECHANICAL_STIMULUS	GO_SENSORY_PERCEPTION_OF_MECHANICAL_STIMULUS		138	0.146129	0.594312	0.988142	1	1	3058	tags=12%, list=17%, signal=15%
GO_ANTIGEN_PROCESSING_AND_PRESENTATION_OF_EXOGENOUS_PEPTIDE_ANTIGEN_VIA_MHC_CLASS_I	GO_ANTIGEN_PROCESSING_AND_PRESENTATION_OF_EXOGENOUS_PEPTIDE_ANTIGEN_VIA_MHC_CLASS_I		64	0.20129	0.5935	0.851711	1	1	3747	tags=23%, list=21%, signal=30%
GO_REGULATION_OF_STRIATED_MUSCLE_CONTRACTION	GO_REGULATION_OF_STRIATED_MUSCLE_CONTRACTION		76	0.165494	0.59324	0.970238	1	1	2227	tags=12%, list=13%, signal=13%
GO_METALLO_SULFUR_CLUSTER_ASSEMBLY	GO_METALLO_SULFUR_CLUSTER_ASSEMBLY		18	0.250494	0.592229	0.858283	1	1	1973	tags=22%, list=11%, signal=25%
GO_POSITIVE_REGULATION_OF_HORMONE_SECRETION	GO_POSITIVE_REGULATION_OF_HORMONE_SECRETION		110	0.135881	0.591964	0.998066	1	1	3310	tags=15%, list=19%, signal=18%
GO_MATING	GO_MATING		33	0.170046	0.590631	0.972222	1	1	1739	tags=9%, list=10%, signal=10%
GO_POSITIVE_REGULATION_OF_MONOCYTE_CHEMOTAXIS	GO_POSITIVE_REGULATION_OF_MONOCYTE_CHEMOTAXIS		15	0.243381	0.590366	0.881323	1	1	2408	tags=13%, list=14%, signal=15%
GO_REGULATION_OF_VIRAL_GENOME_REPLICATION	GO_REGULATION_OF_VIRAL_GENOME_REPLICATION		70	0.159506	0.590078	0.956159	1	1	4323	tags=26%, list=24%, signal=34%
GO_GLANDULAR_EPITHELIAL_CELL_DEVELOPMENT	GO_GLANDULAR_EPITHELIAL_CELL_DEVELOPMENT		17	0.205007	0.587376	0.955166	1	1	1843	tags=12%, list=10%, signal=13%
GO_DNA_STRAND_ELONGATION_INVOLVED_IN_DNA_REPLICATION	GO_DNA_STRAND_ELONGATION_INVOLVED_IN_DNA_REPLICATION		25	0.240889	0.586401	0.844	1	1	4130	tags=32%, list=23%, signal=42%
GO_POSITIVE_REGULATION_OF_RECEPTOR_ACTIVITY	GO_POSITIVE_REGULATION_OF_RECEPTOR_ACTIVITY		44	0.155779	0.585575	0.981855	1	1	6016	tags=39%, list=34%, signal=58%
GO_HORMONE_BIOSYNTHETIC_PROCESS	GO_HORMONE_BIOSYNTHETIC_PROCESS		45	0.160413	0.584455	0.98374	1	1	932	tags=7%, list=5%, signal=7%
GO_B_CELL_ACTIVATION	GO_B_CELL_ACTIVATION		112	0.161625	0.583753	0.933063	1	1	3872	tags=22%, list=22%, signal=28%
GO_KERATINOCYTE_DIFFERENTIATION	GO_KERATINOCYTE_DIFFERENTIATION		79	0.215279	0.583669	0.980507	1	1	3590	tags=22%, list=20%, signal=27%
GO_THREONINE_TYPE_PEPTIDASE_ACTIVITY	GO_THREONINE_TYPE_PEPTIDASE_ACTIVITY		20	0.245658	0.582915	0.83908	1	1	4102	tags=25%, list=23%, signal=33%
GO_EPIDERMAL_CELL_DIFFERENTIATION	GO_EPIDERMAL_CELL_DIFFERENTIATION		119	0.177196	0.581373	0.988072	1	1	3646	tags=21%, list=21%, signal=26%
GO_IRON_ION_BINDING	GO_IRON_ION_BINDING		141	0.132335	0.581343	1	1	1	2716	tags=12%, list=15%, signal=14%
GO_AMMONIUM_ION_BINDING	GO_AMMONIUM_ION_BINDING		63	0.165571	0.581186	0.988212	1	1	6208	tags=43%, list=35%, signal=66%
GO_CELL_DIFFERENTIATION_IN_HINDBRAIN	GO_CELL_DIFFERENTIATION_IN_HINDBRAIN		21	0.211045	0.580176	0.921371	1	1	3550	tags=19%, list=20%, signal=24%
GO_PHOTORECEPTOR_CELL_DIFFERENTIATION	GO_PHOTORECEPTOR_CELL_DIFFERENTIATION		47	0.159268	0.577648	0.982072	1	1	4695	tags=26%, list=27%, signal=35%
GO_CALCIUM_ACTIVATED_CATION_CHANNEL_ACTIVITY	GO_CALCIUM_ACTIVATED_CATION_CHANNEL_ACTIVITY		25	0.188247	0.57696	0.971074	1	1	276	tags=4%, list=2%, signal=4%
GO_SYNAPTONEMAL_COMPLEX	GO_SYNAPTONEMAL_COMPLEX		28	0.183115	0.575285	0.966068	1	1	6015	tags=43%, list=34%, signal=65%
GO_REGULATION_OF_HEAT_GENERATION	GO_REGULATION_OF_HEAT_GENERATION		15	0.215362	0.57465	0.932099	1	1	2568	tags=13%, list=15%, signal=16%
GO_OOCYTE_DIFFERENTIATION	GO_OOCYTE_DIFFERENTIATION		32	0.165153	0.573249	0.981781	1	1	3646	tags=19%, list=21%, signal=24%
GO_PURINE_RIBONUCLEOSIDE_BISPHOSPHATE_METABOLIC_PROCESS	GO_PURINE_RIBONUCLEOSIDE_BISPHOSPHATE_METABOLIC_PROCESS		20	0.195217	0.57271	0.965184	1	1	4261	tags=25%, list=24%, signal=33%
GO_CYTOSKELETAL_ADAPTOR_ACTIVITY	GO_CYTOSKELETAL_ADAPTOR_ACTIVITY		16	0.1958	0.572028	0.973948	1	1	3419	tags=25%, list=19%, signal=31%
GO_INORGANIC_CATION_TRANSMEMBRANE_TRANSPORTER_ACTIVITY	GO_INORGANIC_CATION_TRANSMEMBRANE_TRANSPORTER_ACTIVITY		488	0.135608	0.570655	0.995943	1	1	3507	tags=15%, list=20%, signal=18%
GO_RESPONSE_TO_INTERLEUKIN_6	GO_RESPONSE_TO_INTERLEUKIN_6		26	0.175361	0.570492	0.980315	1	1	4089	tags=27%, list=23%, signal=35%
GO_INOSITOL_LIPID_MEDIATED_SIGNALING	GO_INOSITOL_LIPID_MEDIATED_SIGNALING		113	0.148552	0.570241	0.987854	1	1	3378	tags=17%, list=19%, signal=21%
GO_EYE_PHOTORECEPTOR_CELL_DIFFERENTIATION	GO_EYE_PHOTORECEPTOR_CELL_DIFFERENTIATION		39	0.163256	0.570079	0.985972	1	1	2874	tags=15%, list=16%, signal=18%
GO_I_BAND	GO_I_BAND		116	0.15808	0.566512	0.94831	1	1	1841	tags=9%, list=10%, signal=10%
GO_NEGATIVE_REGULATION_OF_PRODUCTION_OF_MOLECULAR_MEDIATOR_OF_IMMUNE_RESPONSE	GO_NEGATIVE_REGULATION_OF_PRODUCTION_OF_MOLECULAR_MEDIATOR_OF_IMMUNE_RESPONSE		26	0.19131	0.565244	0.941532	1	1	3009	tags=15%, list=17%, signal=19%
GO_REGULATION_OF_MEMBRANE_DEPOLARIZATION	GO_REGULATION_OF_MEMBRANE_DEPOLARIZATION		38	0.171393	0.56469	0.975309	1	1	3419	tags=18%, list=19%, signal=23%
GO_REGULATION_OF_SYNAPTIC_VESICLE_TRANSPORT	GO_REGULATION_OF_SYNAPTIC_VESICLE_TRANSPORT		28	0.177995	0.564559	0.961066	1	1	2050	tags=11%, list=12%, signal=12%
GO_REGULATION_OF_NEUROTRANSMITTER_SECRETION	GO_REGULATION_OF_NEUROTRANSMITTER_SECRETION		44	0.163888	0.562014	0.968815	1	1	971	tags=7%, list=5%, signal=7%
GO_SEGMENT_SPECIFICATION	GO_SEGMENT_SPECIFICATION		15	0.194336	0.561743	0.965306	1	1	2141	tags=13%, list=12%, signal=15%
GO_CELLULAR_SODIUM_ION_HOMEOSTASIS	GO_CELLULAR_SODIUM_ION_HOMEOSTASIS		19	0.191799	0.561145	0.967677	1	1	5473	tags=32%, list=31%, signal=46%
GO_FOREBRAIN_DEVELOPMENT	GO_FOREBRAIN_DEVELOPMENT		342	0.133743	0.560303	0.997947	1	1	5302	tags=29%, list=30%, signal=41%
GO_CEREBELLAR_PURKINJE_CELL_LAYER_DEVELOPMENT	GO_CEREBELLAR_PURKINJE_CELL_LAYER_DEVELOPMENT		23	0.192424	0.558243	0.964803	1	1	2554	tags=17%, list=14%, signal=20%
GO_NEUROMUSCULAR_SYNAPTIC_TRANSMISSION	GO_NEUROMUSCULAR_SYNAPTIC_TRANSMISSION		25	0.209607	0.557497	0.956612	1	1	13961	tags=100%, list=79%, signal=477%
GO_SUBSTRATE_DEPENDENT_CELL_MIGRATION	GO_SUBSTRATE_DEPENDENT_CELL_MIGRATION		26	0.190609	0.556641	0.948454	1	1	1392	tags=12%, list=8%, signal=13%
GO_ATP_HYDROLYSIS_COUPLED_TRANSMEMBRANE_TRANSPORT	GO_ATP_HYDROLYSIS_COUPLED_TRANSMEMBRANE_TRANSPORT		36	0.172723	0.556451	0.972746	1	1	3007	tags=17%, list=17%, signal=20%
GO_OXIDOREDUCTASE_ACTIVITY_ACTING_ON_THE_CH_OH_GROUP_OF_DONORS_NAD_OR_NADP_AS_ACCEPTOR	GO_OXIDOREDUCTASE_ACTIVITY_ACTING_ON_THE_CH_OH_GROUP_OF_DONORS_NAD_OR_NADP_AS_ACCEPTOR		108	0.152783	0.554943	0.979839	1	1	5080	tags=30%, list=29%, signal=41%
GO_CYSTEINE_TYPE_ENDOPEPTIDASE_INHIBITOR_ACTIVITY	GO_CYSTEINE_TYPE_ENDOPEPTIDASE_INHIBITOR_ACTIVITY		48	0.150852	0.554333	0.99604	1	1	4225	tags=21%, list=24%, signal=27%
GO_DEFENSE_RESPONSE_TO_OTHER_ORGANISM	GO_DEFENSE_RESPONSE_TO_OTHER_ORGANISM		403	0.129453	0.553299	1	1	1	2910	tags=14%, list=16%, signal=16%
GO_REGULATION_OF_ENDOCRINE_PROCESS	GO_REGULATION_OF_ENDOCRINE_PROCESS		46	0.162278	0.552991	0.971717	1	1	1858	tags=11%, list=11%, signal=12%
GO_REGULATION_OF_CALCIUM_ION_DEPENDENT_EXOCYTOSIS	GO_REGULATION_OF_CALCIUM_ION_DEPENDENT_EXOCYTOSIS		76	0.153704	0.548945	0.982107	1	1	1441	tags=7%, list=8%, signal=7%
GO_MHC_PROTEIN_COMPLEX_BINDING	GO_MHC_PROTEIN_COMPLEX_BINDING		18	0.217854	0.54567	0.927875	1	1	3438	tags=22%, list=19%, signal=28%
GO_TETRAPYRROLE_BINDING	GO_TETRAPYRROLE_BINDING		124	0.129097	0.545408	1	1	1	5392	tags=27%, list=31%, signal=38%
GO_EMBRYONIC_FORELIMB_MORPHOGENESIS	GO_EMBRYONIC_FORELIMB_MORPHOGENESIS		30	0.167081	0.545405	0.988258	1	1	3646	tags=20%, list=21%, signal=25%
GO_POSITIVE_REGULATION_OF_TYROSINE_PHOSPHORYLATION_OF_STAT3_PROTEIN	GO_POSITIVE_REGULATION_OF_TYROSINE_PHOSPHORYLATION_OF_STAT3_PROTEIN		34	0.161833	0.542586	0.985656	1	1	3857	tags=24%, list=22%, signal=30%
GO_CHONDROCYTE_DEVELOPMENT	GO_CHONDROCYTE_DEVELOPMENT		21	0.205396	0.542012	0.928144	1	1	3368	tags=24%, list=19%, signal=29%
GO_SENSORY_PERCEPTION_OF_LIGHT_STIMULUS	GO_SENSORY_PERCEPTION_OF_LIGHT_STIMULUS		180	0.136438	0.539775	1	1	1	3457	tags=15%, list=20%, signal=18%
GO_PANCREAS_DEVELOPMENT	GO_PANCREAS_DEVELOPMENT		68	0.147742	0.539285	0.992079	1	1	5663	tags=34%, list=32%, signal=50%
GO_POTASSIUM_ION_IMPORT	GO_POTASSIUM_ION_IMPORT		29	0.186238	0.537901	0.970472	1	1	5473	tags=28%, list=31%, signal=40%
GO_PHOSPHATIDYLETHANOLAMINE_ACYL_CHAIN_REMODELING	GO_PHOSPHATIDYLETHANOLAMINE_ACYL_CHAIN_REMODELING		22	0.168318	0.537388	0.983368	1	1	2568	tags=14%, list=15%, signal=16%
GO_BLASTODERM_SEGMENTATION	GO_BLASTODERM_SEGMENTATION		15	0.178236	0.537287	0.99	1	1	2391	tags=13%, list=14%, signal=15%
GO_REGULATION_OF_KERATINOCYTE_PROLIFERATION	GO_REGULATION_OF_KERATINOCYTE_PROLIFERATION		26	0.176439	0.534642	0.991753	1	1	6703	tags=46%, list=38%, signal=74%
GO_RIBONUCLEOSIDE_CATABOLIC_PROCESS	GO_RIBONUCLEOSIDE_CATABOLIC_PROCESS		24	0.169511	0.534077	0.968128	1	1	164	tags=4%, list=1%, signal=4%
GO_ORGAN_INDUCTION	GO_ORGAN_INDUCTION		16	0.193508	0.533858	0.968128	1	1	476	tags=6%, list=3%, signal=6%
GO_MORPHOGENESIS_OF_AN_EPITHELIAL_FOLD	GO_MORPHOGENESIS_OF_AN_EPITHELIAL_FOLD		15	0.195508	0.531927	0.980159	1	1	11984	tags=93%, list=68%, signal=290%
GO_INNERVATION	GO_INNERVATION		22	0.175053	0.530374	0.977226	1	1	5253	tags=27%, list=30%, signal=39%
GO_POSITIVE_REGULATION_OF_POTASSIUM_ION_TRANSMEMBRANE_TRANSPORT	GO_POSITIVE_REGULATION_OF_POTASSIUM_ION_TRANSMEMBRANE_TRANSPORT		26	0.167089	0.530227	0.99002	1	1	4287	tags=27%, list=24%, signal=36%
GO_CELLULAR_HORMONE_METABOLIC_PROCESS	GO_CELLULAR_HORMONE_METABOLIC_PROCESS		97	0.133331	0.529229	1	1	1	1367	tags=6%, list=8%, signal=7%
GO_NEGATIVE_REGULATION_OF_AMINE_TRANSPORT	GO_NEGATIVE_REGULATION_OF_AMINE_TRANSPORT		23	0.186658	0.528613	0.977505	1	1	300	tags=4%, list=2%, signal=4%
GO_REGULATION_OF_ALCOHOL_BIOSYNTHETIC_PROCESS	GO_REGULATION_OF_ALCOHOL_BIOSYNTHETIC_PROCESS		44	0.156468	0.526481	0.98778	1	1	1581	tags=9%, list=9%, signal=10%
GO_SARCOLEMMA	GO_SARCOLEMMA		122	0.1497	0.525641	0.976	1	1	2761	tags=11%, list=16%, signal=14%
GO_CERAMIDE_BIOSYNTHETIC_PROCESS	GO_CERAMIDE_BIOSYNTHETIC_PROCESS		42	0.15181	0.523404	0.990291	1	1	1715	tags=10%, list=10%, signal=11%
GO_CARDIAC_EPITHELIAL_TO_MESENCHYMAL_TRANSITION	GO_CARDIAC_EPITHELIAL_TO_MESENCHYMAL_TRANSITION		24	0.177159	0.522931	0.98167	1	1	4476	tags=29%, list=25%, signal=39%
GO_ANTERIOR_POSTERIOR_PATTERN_SPECIFICATION	GO_ANTERIOR_POSTERIOR_PATTERN_SPECIFICATION		184	0.121754	0.522774	1	1	1	3665	tags=16%, list=21%, signal=20%
GO_POSITIVE_REGULATION_OF_ALCOHOL_BIOSYNTHETIC_PROCESS	GO_POSITIVE_REGULATION_OF_ALCOHOL_BIOSYNTHETIC_PROCESS		22	0.183722	0.521774	0.971015	1	1	1504	tags=9%, list=9%, signal=10%
GO_CEREBRAL_CORTEX_RADIALLY_ORIENTED_CELL_MIGRATION	GO_CEREBRAL_CORTEX_RADIALLY_ORIENTED_CELL_MIGRATION		26	0.173053	0.521088	0.983573	1	1	4772	tags=35%, list=27%, signal=47%
GO_MHC_CLASS_II_PROTEIN_COMPLEX_BINDING	GO_MHC_CLASS_II_PROTEIN_COMPLEX_BINDING		15	0.215443	0.517798	0.944882	1	1	2806	tags=20%, list=16%, signal=24%
GO_NODE_OF_RANVIER	GO_NODE_OF_RANVIER		15	0.206193	0.515936	0.975659	1	1	606	tags=7%, list=3%, signal=7%
GO_CXCR_CHEMOKINE_RECEPTOR_BINDING	GO_CXCR_CHEMOKINE_RECEPTOR_BINDING		15	0.205804	0.515316	0.944223	1	1	14026	tags=100%, list=79%, signal=486%
GO_DEVELOPMENTAL_INDUCTION	GO_DEVELOPMENTAL_INDUCTION		27	0.156883	0.512474	0.984032	1	1	14891	tags=100%, list=84%, signal=637%
GO_POSITIVE_REGULATION_OF_MYOBLAST_DIFFERENTIATION	GO_POSITIVE_REGULATION_OF_MYOBLAST_DIFFERENTIATION		16	0.197828	0.51227	0.964143	1	1	4560	tags=31%, list=26%, signal=42%
GO_T_CELL_ACTIVATION_INVOLVED_IN_IMMUNE_RESPONSE	GO_T_CELL_ACTIVATION_INVOLVED_IN_IMMUNE_RESPONSE		44	0.16965	0.511066	0.96	1	1	2764	tags=16%, list=16%, signal=19%
GO_NEUROTRANSMITTER_BINDING	GO_NEUROTRANSMITTER_BINDING		27	0.180547	0.510017	0.986381	1	1	5822	tags=37%, list=33%, signal=55%
GO_T_TUBULE	GO_T_TUBULE		45	0.157553	0.508727	0.975855	1	1	4481	tags=18%, list=25%, signal=24%
GO_REGULATION_OF_TYROSINE_PHOSPHORYLATION_OF_STAT5_PROTEIN	GO_REGULATION_OF_TYROSINE_PHOSPHORYLATION_OF_STAT5_PROTEIN		17	0.176629	0.506566	0.977688	1	1	12095	tags=94%, list=68%, signal=298%
GO_CEREBELLAR_CORTEX_DEVELOPMENT	GO_CEREBELLAR_CORTEX_DEVELOPMENT		45	0.148113	0.505228	0.987421	1	1	5130	tags=33%, list=29%, signal=47%
GO_ACUTE_PHASE_RESPONSE	GO_ACUTE_PHASE_RESPONSE		40	0.155182	0.50515	0.984704	1	1	14923	tags=100%, list=85%, signal=644%
GO_CARDIAC_MYOFIBRIL_ASSEMBLY	GO_CARDIAC_MYOFIBRIL_ASSEMBLY		15	0.194079	0.50381	0.975258	1	1	4507	tags=27%, list=26%, signal=36%
GO_CHEMOKINE_RECEPTOR_BINDING	GO_CHEMOKINE_RECEPTOR_BINDING		53	0.161318	0.498779	0.97546	1	1	14817	tags=100%, list=84%, signal=620%
GO_MYOFILAMENT	GO_MYOFILAMENT		22	0.162346	0.498663	0.984127	1	1	4507	tags=23%, list=26%, signal=30%
GO_REGULATION_OF_THE_FORCE_OF_HEART_CONTRACTION	GO_REGULATION_OF_THE_FORCE_OF_HEART_CONTRACTION		27	0.169498	0.498542	0.989775	1	1	1731	tags=7%, list=10%, signal=8%
GO_DIGESTIVE_TRACT_MORPHOGENESIS	GO_DIGESTIVE_TRACT_MORPHOGENESIS		47	0.145356	0.496169	0.985507	1	1	3646	tags=19%, list=21%, signal=24%
GO_RESPONSE_TO_NICOTINE	GO_RESPONSE_TO_NICOTINE		49	0.145049	0.493583	0.993789	1	1	3351	tags=14%, list=19%, signal=18%
GO_CELLULAR_RESPONSE_TO_CAMP	GO_CELLULAR_RESPONSE_TO_CAMP		49	0.13844	0.493357	0.997951	1	1	5295	tags=29%, list=30%, signal=41%
GO_REGULATION_OF_HEART_RATE	GO_REGULATION_OF_HEART_RATE		81	0.136351	0.493064	0.992032	1	1	2286	tags=10%, list=13%, signal=11%
GO_POSITIVE_REGULATION_OF_BIOMINERAL_TISSUE_DEVELOPMENT	GO_POSITIVE_REGULATION_OF_BIOMINERAL_TISSUE_DEVELOPMENT		35	0.162118	0.492554	0.979798	1	1	2895	tags=14%, list=16%, signal=17%
GO_PEPTIDE_HORMONE_BINDING	GO_PEPTIDE_HORMONE_BINDING		31	0.162641	0.492135	0.987928	1	1	6036	tags=35%, list=34%, signal=54%
GO_AXIS_ELONGATION	GO_AXIS_ELONGATION		27	0.155404	0.484161	0.989712	1	1	2681	tags=15%, list=15%, signal=17%
GO_CALCIUM_DEPENDENT_CELL_CELL_ADHESION_VIA_PLASMA_MEMBRANE_CELL_ADHESION_MOLECULES	GO_CALCIUM_DEPENDENT_CELL_CELL_ADHESION_VIA_PLASMA_MEMBRANE_CELL_ADHESION_MOLECULES		26	0.175685	0.482293	0.968064	1	1	4894	tags=31%, list=28%, signal=43%
GO_ANTIGEN_PROCESSING_AND_PRESENTATION_OF_ENDOGENOUS_ANTIGEN	GO_ANTIGEN_PROCESSING_AND_PRESENTATION_OF_ENDOGENOUS_ANTIGEN		17	0.193007	0.482189	0.952577	1	1	3257	tags=18%, list=18%, signal=22%
GO_REGULATION_OF_OLIGODENDROCYTE_DIFFERENTIATION	GO_REGULATION_OF_OLIGODENDROCYTE_DIFFERENTIATION		26	0.150361	0.476961	0.990234	1	1	5175	tags=31%, list=29%, signal=43%
GO_CHONDROCYTE_DIFFERENTIATION	GO_CHONDROCYTE_DIFFERENTIATION		59	0.143751	0.475032	0.991952	1	1	2895	tags=14%, list=16%, signal=16%
GO_REGULATION_OF_RETINOIC_ACID_RECEPTOR_SIGNALING_PATHWAY	GO_REGULATION_OF_RETINOIC_ACID_RECEPTOR_SIGNALING_PATHWAY		16	0.153749	0.473902	0.994231	1	1	4751	tags=25%, list=27%, signal=34%
GO_DOPAMINERGIC_NEURON_DIFFERENTIATION	GO_DOPAMINERGIC_NEURON_DIFFERENTIATION		26	0.146411	0.472662	1	1	1	3646	tags=15%, list=21%, signal=19%
GO_FIBROBLAST_GROWTH_FACTOR_RECEPTOR_BINDING	GO_FIBROBLAST_GROWTH_FACTOR_RECEPTOR_BINDING		26	0.159082	0.468405	0.99002	1	1	476	tags=4%, list=3%, signal=4%
GO_MYOTUBE_DIFFERENTIATION	GO_MYOTUBE_DIFFERENTIATION		46	0.138718	0.465247	0.997992	1	1	1838	tags=9%, list=10%, signal=10%
GO_NEURON_MIGRATION	GO_NEURON_MIGRATION		103	0.122496	0.462427	0.997984	1	1	4859	tags=23%, list=28%, signal=32%
GO_POSITIVE_REGULATION_OF_REPRODUCTIVE_PROCESS	GO_POSITIVE_REGULATION_OF_REPRODUCTIVE_PROCESS		45	0.124958	0.462398	1	1	1	35	tags=2%, list=0%, signal=2%
GO_THYROID_GLAND_DEVELOPMENT	GO_THYROID_GLAND_DEVELOPMENT		25	0.141949	0.461694	0.991903	1	1	3878	tags=20%, list=22%, signal=26%
GO_REGULATION_OF_INTERLEUKIN_17_PRODUCTION	GO_REGULATION_OF_INTERLEUKIN_17_PRODUCTION		21	0.164715	0.457236	0.989451	1	1	3727	tags=19%, list=21%, signal=24%
GO_CARDIAC_MUSCLE_CELL_ACTION_POTENTIAL	GO_CARDIAC_MUSCLE_CELL_ACTION_POTENTIAL		35	0.146151	0.455605	0.992032	1	1	5576	tags=26%, list=32%, signal=38%
GO_PROXIMAL_DISTAL_PATTERN_FORMATION	GO_PROXIMAL_DISTAL_PATTERN_FORMATION		31	0.152096	0.455056	0.987805	1	1	14976	tags=100%, list=85%, signal=657%
GO_ORGAN_FORMATION	GO_ORGAN_FORMATION		34	0.135591	0.455015	0.997908	1	1	4038	tags=21%, list=23%, signal=27%
GO_ASPARTATE_FAMILY_AMINO_ACID_CATABOLIC_PROCESS	GO_ASPARTATE_FAMILY_AMINO_ACID_CATABOLIC_PROCESS		16	0.164857	0.452424	0.989919	1	1	5291	tags=31%, list=30%, signal=45%
GO_TEMPERATURE_HOMEOSTASIS	GO_TEMPERATURE_HOMEOSTASIS		24	0.147216	0.445208	0.99177	1	1	15061	tags=100%, list=85%, signal=679%
GO_DIGESTION	GO_DIGESTION		116	0.11631	0.442517	1	1	1	5583	tags=30%, list=32%, signal=44%
GO_FOREBRAIN_CELL_MIGRATION	GO_FOREBRAIN_CELL_MIGRATION		59	0.130907	0.44235	0.997938	1	1	4953	tags=29%, list=28%, signal=40%
GO_ACETYLCHOLINE_BINDING	GO_ACETYLCHOLINE_BINDING		21	0.162282	0.437195	0.998051	1	1	6208	tags=48%, list=35%, signal=73%
GO_REGULATION_OF_APPETITE	GO_REGULATION_OF_APPETITE		20	0.146615	0.434202	0.99596	1	1	15071	tags=100%, list=85%, signal=682%
GO_MELANOCYTE_DIFFERENTIATION	GO_MELANOCYTE_DIFFERENTIATION		16	0.158259	0.431594	0.991984	1	1	14865	tags=100%, list=84%, signal=632%
GO_REGULATION_OF_CALCINEURIN_NFAT_SIGNALING_CASCADE	GO_REGULATION_OF_CALCINEURIN_NFAT_SIGNALING_CASCADE		16	0.148316	0.422001	0.993684	1	1	4287	tags=19%, list=24%, signal=25%
GO_COPULATION	GO_COPULATION		15	0.152214	0.421567	1	1	1	4869	tags=27%, list=28%, signal=37%
GO_SUBPALLIUM_DEVELOPMENT	GO_SUBPALLIUM_DEVELOPMENT		21	0.138078	0.420501	0.997972	1	1	6081	tags=48%, list=34%, signal=73%
GO_GLYCOSPHINGOLIPID_BIOSYNTHETIC_PROCESS	GO_GLYCOSPHINGOLIPID_BIOSYNTHETIC_PROCESS		23	0.145489	0.420207	0.995984	1	1	1715	tags=9%, list=10%, signal=10%
GO_HINDLIMB_MORPHOGENESIS	GO_HINDLIMB_MORPHOGENESIS		36	0.127561	0.417783	1	1	1	4608	tags=19%, list=26%, signal=26%
GO_REGULATION_OF_PROTEIN_ACTIVATION_CASCADE	GO_REGULATION_OF_PROTEIN_ACTIVATION_CASCADE		32	0.140162	0.416942	0.993737	1	1	160	tags=3%, list=1%, signal=3%
GO_SENSORY_PERCEPTION_OF_CHEMICAL_STIMULUS	GO_SENSORY_PERCEPTION_OF_CHEMICAL_STIMULUS		96	0.116467	0.414337	1	0.999743	1	5952	tags=31%, list=34%, signal=47%
GO_CRANIAL_SKELETAL_SYSTEM_DEVELOPMENT	GO_CRANIAL_SKELETAL_SYSTEM_DEVELOPMENT		55	0.11842	0.413306	0.998031	0.999304	1	3646	tags=16%, list=21%, signal=21%
GO_VOLTAGE_GATED_CALCIUM_CHANNEL_COMPLEX	GO_VOLTAGE_GATED_CALCIUM_CHANNEL_COMPLEX		36	0.13154	0.39417	1	0.999896	1	15339	tags=100%, list=87%, signal=760%
GO_SYNAPTIC_TRANSMISSION_CHOLINERGIC	GO_SYNAPTIC_TRANSMISSION_CHOLINERGIC		33	0.133163	0.387397	1	0.999704	1	13646	tags=97%, list=77%, signal=426%
GO_CORECEPTOR_ACTIVITY	GO_CORECEPTOR_ACTIVITY		34	0.130808	0.368397	1	0.999851	1	3319	tags=15%, list=19%, signal=18%
GO_MONOOXYGENASE_ACTIVITY	GO_MONOOXYGENASE_ACTIVITY		87	0.0922015	0.3676	1	0.999367	1	5772	tags=29%, list=33%, signal=42%
GO_CATION_TRANSPORTING_ATPASE_COMPLEX	GO_CATION_TRANSPORTING_ATPASE_COMPLEX		15	0.131214	0.3417	1	0.999418	1	15342	tags=100%, list=87%, signal=762%

## Sheet: Low exoressino of DCTN4
NAME	GS<br> follow link to MSigDB	GS DETAILS	SIZE	ES	NES	NOM p-val	FDR q-val	FWER p-val	RANK AT MAX	LEADING EDGE
GO_POSITIVE_REGULATION_OF_NUCLEASE_ACTIVITY	GO_POSITIVE_REGULATION_OF_NUCLEASE_ACTIVITY	Details ...	15	-0.655039	-1.87633	0	1	0.763	1453	tags=33%, list=8%, signal=36%
GO_SEMAPHORIN_RECEPTOR_BINDING	GO_SEMAPHORIN_RECEPTOR_BINDING	Details ...	22	-0.630139	-1.77444	0	1	0.944	5120	tags=82%, list=29%, signal=115%
GO_SEMAPHORIN_PLEXIN_SIGNALING_PATHWAY	GO_SEMAPHORIN_PLEXIN_SIGNALING_PATHWAY	Details ...	36	-0.596821	-1.77329	0.00759013	1	0.944	5120	tags=72%, list=29%, signal=102%
GO_NAD_DEPENDENT_PROTEIN_DEACETYLASE_ACTIVITY	GO_NAD_DEPENDENT_PROTEIN_DEACETYLASE_ACTIVITY	Details ...	17	-0.60356	-1.75767	0.00598802	1	0.951	1614	tags=47%, list=9%, signal=52%
GO_NEGATIVE_REGULATION_OF_AXON_GUIDANCE	GO_NEGATIVE_REGULATION_OF_AXON_GUIDANCE	Details ...	27	-0.585473	-1.73253	0.00965251	1	0.964	5598	tags=74%, list=32%, signal=108%
GO_NEGATIVE_REGULATION_OF_STRIATED_MUSCLE_CELL_DIFFERENTIATION	GO_NEGATIVE_REGULATION_OF_STRIATED_MUSCLE_CELL_DIFFERENTIATION	Details ...	24	-0.518073	-1.72722	0.00203666	1	0.969	1408	tags=21%, list=8%, signal=23%
GO_NEGATIVE_REGULATION_OF_MYOTUBE_DIFFERENTIATION	GO_NEGATIVE_REGULATION_OF_MYOTUBE_DIFFERENTIATION	Details ...	16	-0.567461	-1.71093	0.0120482	1	0.979	1137	tags=19%, list=6%, signal=20%
GO_REGULATION_OF_AXON_GUIDANCE	GO_REGULATION_OF_AXON_GUIDANCE	Details ...	39	-0.55554	-1.69866	0.0113852	1	0.987	5602	tags=69%, list=32%, signal=101%
GO_RESPONSE_TO_INTERLEUKIN_4	GO_RESPONSE_TO_INTERLEUKIN_4	Details ...	29	-0.557064	-1.69676	0.00784314	1	0.987	3004	tags=41%, list=17%, signal=50%
GO_REGULATION_OF_CGMP_BIOSYNTHETIC_PROCESS	GO_REGULATION_OF_CGMP_BIOSYNTHETIC_PROCESS	Details ...	20	-0.572274	-1.65573	0.00604839	1	0.995	5949	tags=65%, list=34%, signal=98%
GO_CELLULAR_RESPONSE_TO_INTERLEUKIN_4	GO_CELLULAR_RESPONSE_TO_INTERLEUKIN_4	Details ...	24	-0.557601	-1.65476	0.011811	1	0.995	3004	tags=42%, list=17%, signal=50%
GO_NEGATIVE_REGULATION_OF_CHEMOTAXIS	GO_NEGATIVE_REGULATION_OF_CHEMOTAXIS	Details ...	50	-0.491832	-1.64589	0.0155642	1	0.996	5598	tags=56%, list=32%, signal=82%
GO_NEGATIVE_REGULATION_OF_AXON_EXTENSION	GO_NEGATIVE_REGULATION_OF_AXON_EXTENSION	Details ...	37	-0.484694	-1.62715	0.027881	1	0.999	5120	tags=59%, list=29%, signal=84%
GO_NEGATIVE_REGULATION_OF_INTERLEUKIN_1_PRODUCTION	GO_NEGATIVE_REGULATION_OF_INTERLEUKIN_1_PRODUCTION	Details ...	16	-0.638339	-1.60644	0.0372671	1	1	2932	tags=38%, list=17%, signal=45%
GO_NEGATIVE_REGULATION_OF_NOTCH_SIGNALING_PATHWAY	GO_NEGATIVE_REGULATION_OF_NOTCH_SIGNALING_PATHWAY	Details ...	26	-0.535818	-1.59153	0.033195	1	1	3736	tags=42%, list=21%, signal=54%
GO_REGULATION_OF_TRIGLYCERIDE_BIOSYNTHETIC_PROCESS	GO_REGULATION_OF_TRIGLYCERIDE_BIOSYNTHETIC_PROCESS	Details ...	17	-0.552177	-1.58087	0.0403846	1	1	5180	tags=59%, list=29%, signal=83%
GO_ACTIVATION_OF_JUN_KINASE_ACTIVITY	GO_ACTIVATION_OF_JUN_KINASE_ACTIVITY	Details ...	32	-0.496975	-1.57717	0.0259481	1	1	3284	tags=47%, list=19%, signal=57%
GO_CILIARY_BASE	GO_CILIARY_BASE	Details ...	21	-0.50464	-1.57592	0.0346154	1	1	2949	tags=43%, list=17%, signal=51%
GO_VIRAL_GENOME_REPLICATION	GO_VIRAL_GENOME_REPLICATION	Details ...	19	-0.501499	-1.56672	0.0180723	1	1	1159	tags=32%, list=7%, signal=34%
GO_POSITIVE_REGULATION_OF_PROTEIN_MATURATION	GO_POSITIVE_REGULATION_OF_PROTEIN_MATURATION	Details ...	16	-0.574022	-1.56376	0.0392927	1	1	4751	tags=56%, list=27%, signal=77%
GO_NEUROPEPTIDE_RECEPTOR_BINDING	GO_NEUROPEPTIDE_RECEPTOR_BINDING	Details ...	25	-0.516504	-1.55559	0.0304878	1	1	5847	tags=64%, list=33%, signal=96%
GO_REGULATION_OF_CGMP_METABOLIC_PROCESS	GO_REGULATION_OF_CGMP_METABOLIC_PROCESS	Details ...	25	-0.523082	-1.54716	0.0288066	1	1	5949	tags=64%, list=34%, signal=96%
GO_REGULATION_OF_TUMOR_NECROSIS_FACTOR_MEDIATED_SIGNALING_PATHWAY	GO_REGULATION_OF_TUMOR_NECROSIS_FACTOR_MEDIATED_SIGNALING_PATHWAY	Details ...	45	-0.427095	-1.54573	0.0511811	1	1	3738	tags=49%, list=21%, signal=62%
GO_DEATH_RECEPTOR_ACTIVITY	GO_DEATH_RECEPTOR_ACTIVITY	Details ...	23	-0.564146	-1.54258	0.0525253	1	1	3387	tags=52%, list=19%, signal=64%
GO_NEUROPILIN_BINDING	GO_NEUROPILIN_BINDING	Details ...	15	-0.58604	-1.54209	0.0457256	1	1	5069	tags=73%, list=29%, signal=103%
GO_APOPTOTIC_PROCESS_INVOLVED_IN_MORPHOGENESIS	GO_APOPTOTIC_PROCESS_INVOLVED_IN_MORPHOGENESIS	Details ...	16	-0.556903	-1.54045	0.0561122	1	1	3111	tags=44%, list=18%, signal=53%
GO_REGULATION_OF_HYDROGEN_PEROXIDE_METABOLIC_PROCESS	GO_REGULATION_OF_HYDROGEN_PEROXIDE_METABOLIC_PROCESS	Details ...	15	-0.552907	-1.53203	0.0567515	1	1	5536	tags=53%, list=31%, signal=78%
GO_NEGATIVE_REGULATION_OF_REACTIVE_OXYGEN_SPECIES_BIOSYNTHETIC_PROCESS	GO_NEGATIVE_REGULATION_OF_REACTIVE_OXYGEN_SPECIES_BIOSYNTHETIC_PROCESS	Details ...	15	-0.577993	-1.52899	0.05	1	1	3414	tags=40%, list=19%, signal=50%
GO_CHEMOREPELLENT_ACTIVITY	GO_CHEMOREPELLENT_ACTIVITY	Details ...	27	-0.514296	-1.52691	0.0418251	1	1	5120	tags=59%, list=29%, signal=83%
GO_ANCHORED_COMPONENT_OF_EXTERNAL_SIDE_OF_PLASMA_MEMBRANE	GO_ANCHORED_COMPONENT_OF_EXTERNAL_SIDE_OF_PLASMA_MEMBRANE	Details ...	17	-0.555311	-1.5261	0.0688259	1	1	4840	tags=59%, list=27%, signal=81%
GO_POSITIVE_REGULATION_OF_TRIGLYCERIDE_METABOLIC_PROCESS	GO_POSITIVE_REGULATION_OF_TRIGLYCERIDE_METABOLIC_PROCESS	Details ...	19	-0.536142	-1.50625	0.0631365	1	1	3414	tags=42%, list=19%, signal=52%
GO_REGULATION_OF_CHOLESTEROL_EFFLUX	GO_REGULATION_OF_CHOLESTEROL_EFFLUX	Details ...	20	-0.511232	-1.50579	0.0573123	1	1	4133	tags=55%, list=23%, signal=72%
GO_NEGATIVE_REGULATION_OF_INTERLEUKIN_2_PRODUCTION	GO_NEGATIVE_REGULATION_OF_INTERLEUKIN_2_PRODUCTION	Details ...	16	-0.610787	-1.50282	0.0752033	1	1	3433	tags=50%, list=19%, signal=62%
GO_HSP90_PROTEIN_BINDING	GO_HSP90_PROTEIN_BINDING	Details ...	26	-0.439323	-1.49991	0.046371	1	1	1322	tags=27%, list=7%, signal=29%
GO_NEGATIVE_REGULATION_OF_TISSUE_REMODELING	GO_NEGATIVE_REGULATION_OF_TISSUE_REMODELING	Details ...	16	-0.559305	-1.49442	0.0678643	1	1	5191	tags=56%, list=29%, signal=80%
GO_NEGATIVE_REGULATION_OF_TUMOR_NECROSIS_FACTOR_SUPERFAMILY_CYTOKINE_PRODUCTION	GO_NEGATIVE_REGULATION_OF_TUMOR_NECROSIS_FACTOR_SUPERFAMILY_CYTOKINE_PRODUCTION	Details ...	40	-0.495825	-1.48992	0.0758483	1	1	5143	tags=58%, list=29%, signal=81%
GO_POSITIVE_REGULATION_OF_BLOOD_VESSEL_ENDOTHELIAL_CELL_MIGRATION	GO_POSITIVE_REGULATION_OF_BLOOD_VESSEL_ENDOTHELIAL_CELL_MIGRATION	Details ...	25	-0.52816	-1.48753	0.084	1	1	4269	tags=48%, list=24%, signal=63%
GO_CORONARY_VASCULATURE_DEVELOPMENT	GO_CORONARY_VASCULATURE_DEVELOPMENT	Details ...	36	-0.470262	-1.48631	0.0715667	1	1	5178	tags=50%, list=29%, signal=71%
GO_CALMODULIN_DEPENDENT_PROTEIN_KINASE_ACTIVITY	GO_CALMODULIN_DEPENDENT_PROTEIN_KINASE_ACTIVITY	Details ...	28	-0.469008	-1.48402	0.0538922	1	1	4932	tags=57%, list=28%, signal=79%
GO_REGULATION_OF_VASCULAR_PERMEABILITY	GO_REGULATION_OF_VASCULAR_PERMEABILITY	Details ...	29	-0.495865	-1.47996	0.0687623	1	1	4414	tags=52%, list=25%, signal=69%
GO_REGULATION_OF_HISTONE_DEACETYLATION	GO_REGULATION_OF_HISTONE_DEACETYLATION	Details ...	23	-0.492324	-1.47134	0.0887097	1	1	3459	tags=52%, list=20%, signal=65%
GO_EMBRYONIC_PLACENTA_MORPHOGENESIS	GO_EMBRYONIC_PLACENTA_MORPHOGENESIS	Details ...	21	-0.495518	-1.47097	0.0724346	1	1	5374	tags=43%, list=30%, signal=62%
GO_FUCOSYLATION	GO_FUCOSYLATION	Details ...	21	-0.486876	-1.46749	0.0881148	1	1	5733	tags=57%, list=32%, signal=85%
GO_NEGATIVE_REGULATION_OF_CELL_GROWTH	GO_NEGATIVE_REGULATION_OF_CELL_GROWTH	Details ...	162	-0.348724	-1.46722	0.0406977	1	1	5635	tags=48%, list=32%, signal=69%
GO_INTRACELLULAR_ESTROGEN_RECEPTOR_SIGNALING_PATHWAY	GO_INTRACELLULAR_ESTROGEN_RECEPTOR_SIGNALING_PATHWAY	Details ...	16	-0.511899	-1.46485	0.0876494	1	1	1487	tags=44%, list=8%, signal=48%
GO_REGULATION_OF_MITOPHAGY	GO_REGULATION_OF_MITOPHAGY	Details ...	40	-0.42692	-1.46105	0.0699589	1	1	3120	tags=48%, list=18%, signal=58%
GO_SH3_DOMAIN_BINDING	GO_SH3_DOMAIN_BINDING	Details ...	113	-0.368818	-1.45961	0.063745	1	1	3317	tags=37%, list=19%, signal=45%
GO_CARTILAGE_DEVELOPMENT_INVOLVED_IN_ENDOCHONDRAL_BONE_MORPHOGENESIS	GO_CARTILAGE_DEVELOPMENT_INVOLVED_IN_ENDOCHONDRAL_BONE_MORPHOGENESIS	Details ...	19	-0.537402	-1.45932	0.0641822	1	1	4573	tags=47%, list=26%, signal=64%
GO_INTRINSIC_COMPONENT_OF_EXTERNAL_SIDE_OF_PLASMA_MEMBRANE	GO_INTRINSIC_COMPONENT_OF_EXTERNAL_SIDE_OF_PLASMA_MEMBRANE	Details ...	22	-0.493162	-1.45917	0.0916497	1	1	4840	tags=50%, list=27%, signal=69%
GO_POSITIVE_REGULATION_OF_PROTEIN_DEACETYLATION	GO_POSITIVE_REGULATION_OF_PROTEIN_DEACETYLATION	Details ...	18	-0.514014	-1.45024	0.102669	1	1	4584	tags=61%, list=26%, signal=82%
GO_PROTEIN_LIPID_COMPLEX_SUBUNIT_ORGANIZATION	GO_PROTEIN_LIPID_COMPLEX_SUBUNIT_ORGANIZATION	Details ...	35	-0.430596	-1.4501	0.0729783	1	1	4147	tags=37%, list=23%, signal=48%
GO_RECEPTOR_REGULATOR_ACTIVITY	GO_RECEPTOR_REGULATOR_ACTIVITY	Details ...	43	-0.419416	-1.44995	0.0684647	1	1	6301	tags=56%, list=36%, signal=87%
GO_RESPONSE_TO_AUDITORY_STIMULUS	GO_RESPONSE_TO_AUDITORY_STIMULUS	Details ...	23	-0.469976	-1.44546	0.0681363	1	1	4822	tags=39%, list=27%, signal=54%
GO_CELLULAR_RESPONSE_TO_VIRUS	GO_CELLULAR_RESPONSE_TO_VIRUS	Details ...	21	-0.490015	-1.4437	0.095057	1	1	3952	tags=48%, list=22%, signal=61%
GO_OMEGA_PEPTIDASE_ACTIVITY	GO_OMEGA_PEPTIDASE_ACTIVITY	Details ...	16	-0.479636	-1.4433	0.0647773	1	1	4658	tags=56%, list=26%, signal=76%
GO_REGULATION_OF_BONE_DEVELOPMENT	GO_REGULATION_OF_BONE_DEVELOPMENT	Details ...	16	-0.553966	-1.44152	0.129225	1	1	3414	tags=50%, list=19%, signal=62%
GO_POSITIVE_REGULATION_OF_LIPID_STORAGE	GO_POSITIVE_REGULATION_OF_LIPID_STORAGE	Details ...	18	-0.525375	-1.44011	0.0809717	1	1	2450	tags=39%, list=14%, signal=45%
GO_HISTONE_H3_DEACETYLATION	GO_HISTONE_H3_DEACETYLATION	Details ...	22	-0.444027	-1.43898	0.0783505	1	1	1614	tags=36%, list=9%, signal=40%
GO_INTRINSIC_APOPTOTIC_SIGNALING_PATHWAY_IN_RESPONSE_TO_DNA_DAMAGE	GO_INTRINSIC_APOPTOTIC_SIGNALING_PATHWAY_IN_RESPONSE_TO_DNA_DAMAGE	Details ...	70	-0.350604	-1.43342	0.0610998	1	1	4015	tags=40%, list=23%, signal=52%
GO_IRE1_MEDIATED_UNFOLDED_PROTEIN_RESPONSE	GO_IRE1_MEDIATED_UNFOLDED_PROTEIN_RESPONSE	Details ...	53	-0.399494	-1.43261	0.0989474	1	1	2676	tags=40%, list=15%, signal=47%
GO_NEGATIVE_REGULATION_OF_NF_KAPPAB_TRANSCRIPTION_FACTOR_ACTIVITY	GO_NEGATIVE_REGULATION_OF_NF_KAPPAB_TRANSCRIPTION_FACTOR_ACTIVITY	Details ...	61	-0.361676	-1.42896	0.0665323	1	1	3563	tags=36%, list=20%, signal=45%
GO_REGULATION_OF_PRI_MIRNA_TRANSCRIPTION_FROM_RNA_POLYMERASE_II_PROMOTER	GO_REGULATION_OF_PRI_MIRNA_TRANSCRIPTION_FROM_RNA_POLYMERASE_II_PROMOTER	Details ...	17	-0.51398	-1.42878	0.0928854	1	1	2418	tags=41%, list=14%, signal=48%
GO_RESPONSE_TO_FLUID_SHEAR_STRESS	GO_RESPONSE_TO_FLUID_SHEAR_STRESS	Details ...	33	-0.475456	-1.4272	0.110887	1	1	4434	tags=45%, list=25%, signal=61%
GO_REGULATION_OF_TRANSCRIPTION_ELONGATION_FROM_RNA_POLYMERASE_II_PROMOTER	GO_REGULATION_OF_TRANSCRIPTION_ELONGATION_FROM_RNA_POLYMERASE_II_PROMOTER	Details ...	20	-0.471075	-1.42152	0.0877551	1	1	412	tags=30%, list=2%, signal=31%
GO_PATTERNING_OF_BLOOD_VESSELS	GO_PATTERNING_OF_BLOOD_VESSELS	Details ...	31	-0.450782	-1.42068	0.112811	1	1	4541	tags=45%, list=26%, signal=61%
GO_CYTOPLASMIC_SEQUESTERING_OF_TRANSCRIPTION_FACTOR	GO_CYTOPLASMIC_SEQUESTERING_OF_TRANSCRIPTION_FACTOR	Details ...	19	-0.464388	-1.42	0.0997921	1	1	2427	tags=42%, list=14%, signal=49%
GO_METHYL_CPG_BINDING	GO_METHYL_CPG_BINDING	Details ...	15	-0.508895	-1.41999	0.0987654	1	1	2529	tags=47%, list=14%, signal=54%
GO_RESPONSE_TO_PH	GO_RESPONSE_TO_PH	Details ...	35	-0.440611	-1.41924	0.0875764	1	1	3574	tags=34%, list=20%, signal=43%
GO_REGULATION_OF_ACTIN_CYTOSKELETON_REORGANIZATION	GO_REGULATION_OF_ACTIN_CYTOSKELETON_REORGANIZATION	Details ...	31	-0.473702	-1.41834	0.130261	1	1	5459	tags=61%, list=31%, signal=89%
GO_POSITIVE_REGULATION_OF_ENDOTHELIAL_CELL_MIGRATION	GO_POSITIVE_REGULATION_OF_ENDOTHELIAL_CELL_MIGRATION	Details ...	64	-0.42802	-1.41338	0.128405	1	1	5016	tags=50%, list=28%, signal=70%
GO_CYCLIC_NUCLEOTIDE_BIOSYNTHETIC_PROCESS	GO_CYCLIC_NUCLEOTIDE_BIOSYNTHETIC_PROCESS	Details ...	32	-0.481654	-1.41331	0.0964567	1	1	6074	tags=59%, list=34%, signal=90%
GO_REGULATION_OF_SYNAPTIC_TRANSMISSION_DOPAMINERGIC	GO_REGULATION_OF_SYNAPTIC_TRANSMISSION_DOPAMINERGIC	Details ...	16	-0.509756	-1.41295	0.097166	1	1	6328	tags=69%, list=36%, signal=107%
GO_PROTEIN_DEACETYLASE_ACTIVITY	GO_PROTEIN_DEACETYLASE_ACTIVITY	Details ...	43	-0.386153	-1.41214	0.0745968	1	1	1845	tags=33%, list=10%, signal=36%
GO_REGULATION_OF_FATTY_ACID_BETA_OXIDATION	GO_REGULATION_OF_FATTY_ACID_BETA_OXIDATION	Details ...	15	-0.521395	-1.41163	0.0972222	1	1	5072	tags=60%, list=29%, signal=84%
GO_NEGATIVE_REGULATION_OF_SMOOTH_MUSCLE_CELL_MIGRATION	GO_NEGATIVE_REGULATION_OF_SMOOTH_MUSCLE_CELL_MIGRATION	Details ...	16	-0.529665	-1.4105	0.117764	1	1	5956	tags=69%, list=34%, signal=104%
GO_REGULATION_OF_VIRAL_ENTRY_INTO_HOST_CELL	GO_REGULATION_OF_VIRAL_ENTRY_INTO_HOST_CELL	Details ...	24	-0.47015	-1.40982	0.104418	1	1	3526	tags=46%, list=20%, signal=57%
GO_CELLULAR_RESPONSE_TO_PH	GO_CELLULAR_RESPONSE_TO_PH	Details ...	15	-0.500688	-1.40979	0.107486	1	1	3361	tags=47%, list=19%, signal=58%
GO_NEUTRAL_LIPID_CATABOLIC_PROCESS	GO_NEUTRAL_LIPID_CATABOLIC_PROCESS	Details ...	23	-0.474145	-1.40838	0.103175	1	1	4369	tags=35%, list=25%, signal=46%
GO_NEGATIVE_REGULATION_OF_EMBRYONIC_DEVELOPMENT	GO_NEGATIVE_REGULATION_OF_EMBRYONIC_DEVELOPMENT	Details ...	26	-0.46237	-1.40684	0.114723	1	1	4998	tags=54%, list=28%, signal=75%
GO_EPHRIN_RECEPTOR_ACTIVITY	GO_EPHRIN_RECEPTOR_ACTIVITY	Details ...	19	-0.484948	-1.40637	0.0891089	1	1	4808	tags=37%, list=27%, signal=51%
GO_HISTONE_DEACETYLASE_COMPLEX	GO_HISTONE_DEACETYLASE_COMPLEX	Details ...	60	-0.356537	-1.40602	0.066	1	1	1121	tags=23%, list=6%, signal=25%
GO_REGULATION_OF_PLASMA_LIPOPROTEIN_PARTICLE_LEVELS	GO_REGULATION_OF_PLASMA_LIPOPROTEIN_PARTICLE_LEVELS	Details ...	44	-0.412457	-1.40464	0.0950495	1	1	5131	tags=45%, list=29%, signal=64%
GO_DOPAMINE_RECEPTOR_BINDING	GO_DOPAMINE_RECEPTOR_BINDING	Details ...	16	-0.499839	-1.40436	0.1	1	1	3148	tags=44%, list=18%, signal=53%
GO_REGULATION_OF_INCLUSION_BODY_ASSEMBLY	GO_REGULATION_OF_INCLUSION_BODY_ASSEMBLY	Details ...	15	-0.495162	-1.3999	0.0967118	1	1	4013	tags=33%, list=23%, signal=43%
GO_POSITIVE_REGULATION_OF_ERBB_SIGNALING_PATHWAY	GO_POSITIVE_REGULATION_OF_ERBB_SIGNALING_PATHWAY	Details ...	33	-0.410957	-1.39896	0.0783505	1	1	5141	tags=52%, list=29%, signal=73%
GO_MONOAMINE_TRANSPORT	GO_MONOAMINE_TRANSPORT	Details ...	21	-0.465183	-1.39765	0.107212	1	1	5536	tags=43%, list=31%, signal=62%
GO_PROTEIN_KINASE_C_ACTIVATING_G_PROTEIN_COUPLED_RECEPTOR_SIGNALING_PATHWAY	GO_PROTEIN_KINASE_C_ACTIVATING_G_PROTEIN_COUPLED_RECEPTOR_SIGNALING_PATHWAY	Details ...	30	-0.416606	-1.39705	0.077381	1	1	1711	tags=20%, list=10%, signal=22%
GO_CLATHRIN_ADAPTOR_COMPLEX	GO_CLATHRIN_ADAPTOR_COMPLEX	Details ...	27	-0.424355	-1.3938	0.114754	1	1	2071	tags=41%, list=12%, signal=46%
GO_CELLULAR_RESPONSE_TO_VASCULAR_ENDOTHELIAL_GROWTH_FACTOR_STIMULUS	GO_CELLULAR_RESPONSE_TO_VASCULAR_ENDOTHELIAL_GROWTH_FACTOR_STIMULUS	Details ...	29	-0.505038	-1.39338	0.153996	1	1	4782	tags=48%, list=27%, signal=66%
GO_NEGATIVE_REGULATION_OF_CELLULAR_RESPONSE_TO_INSULIN_STIMULUS	GO_NEGATIVE_REGULATION_OF_CELLULAR_RESPONSE_TO_INSULIN_STIMULUS	Details ...	30	-0.402488	-1.39338	0.0924855	1	1	2179	tags=33%, list=12%, signal=38%
GO_ADHERENS_JUNCTION_ASSEMBLY	GO_ADHERENS_JUNCTION_ASSEMBLY	Details ...	33	-0.458345	-1.39027	0.110887	1	1	4434	tags=48%, list=25%, signal=65%
GO_SODIUM_CHANNEL_ACTIVITY	GO_SODIUM_CHANNEL_ACTIVITY	Details ...	31	-0.465102	-1.38881	0.110236	1	1	4383	tags=35%, list=25%, signal=47%
GO_GLYCEROLIPID_CATABOLIC_PROCESS	GO_GLYCEROLIPID_CATABOLIC_PROCESS	Details ...	34	-0.416676	-1.3887	0.0794297	1	1	4405	tags=35%, list=25%, signal=47%
GO_MITOGEN_ACTIVATED_PROTEIN_KINASE_KINASE_KINASE_BINDING	GO_MITOGEN_ACTIVATED_PROTEIN_KINASE_KINASE_KINASE_BINDING	Details ...	18	-0.442663	-1.37902	0.0932039	1	1	1094	tags=33%, list=6%, signal=35%
GO_NOTCH_BINDING	GO_NOTCH_BINDING	Details ...	18	-0.484044	-1.37646	0.125498	1	1	1137	tags=22%, list=6%, signal=24%
GO_MITOGEN_ACTIVATED_PROTEIN_KINASE_KINASE_BINDING	GO_MITOGEN_ACTIVATED_PROTEIN_KINASE_KINASE_BINDING	Details ...	16	-0.481786	-1.37612	0.1341	1	1	2254	tags=44%, list=13%, signal=50%
GO_BLOOD_VESSEL_ENDOTHELIAL_CELL_MIGRATION	GO_BLOOD_VESSEL_ENDOTHELIAL_CELL_MIGRATION	Details ...	24	-0.474037	-1.37417	0.133466	1	1	5598	tags=50%, list=32%, signal=73%
GO_POSITIVE_REGULATION_OF_IMMUNOGLOBULIN_PRODUCTION	GO_POSITIVE_REGULATION_OF_IMMUNOGLOBULIN_PRODUCTION	Details ...	28	-0.446003	-1.37383	0.141473	1	1	4266	tags=43%, list=24%, signal=56%
GO_POSITIVE_REGULATION_OF_JUN_KINASE_ACTIVITY	GO_POSITIVE_REGULATION_OF_JUN_KINASE_ACTIVITY	Details ...	60	-0.386656	-1.37262	0.11501	1	1	4697	tags=43%, list=27%, signal=59%
GO_STEROL_HOMEOSTASIS	GO_STEROL_HOMEOSTASIS	Details ...	55	-0.368839	-1.36903	0.0934959	1	1	4369	tags=38%, list=25%, signal=51%
GO_NEGATIVE_REGULATION_OF_TYPE_I_INTERFERON_PRODUCTION	GO_NEGATIVE_REGULATION_OF_TYPE_I_INTERFERON_PRODUCTION	Details ...	38	-0.416063	-1.36827	0.154	1	1	4348	tags=50%, list=25%, signal=66%
GO_CAMP_BIOSYNTHETIC_PROCESS	GO_CAMP_BIOSYNTHETIC_PROCESS	Details ...	17	-0.530017	-1.3658	0.120079	1	1	6074	tags=65%, list=34%, signal=99%
GO_AP_TYPE_MEMBRANE_COAT_ADAPTOR_COMPLEX	GO_AP_TYPE_MEMBRANE_COAT_ADAPTOR_COMPLEX	Details ...	36	-0.384926	-1.36311	0.129159	1	1	1080	tags=31%, list=6%, signal=32%
GO_AXONAL_FASCICULATION	GO_AXONAL_FASCICULATION	Details ...	20	-0.486561	-1.36288	0.161736	1	1	4202	tags=35%, list=24%, signal=46%
GO_REGULATION_OF_CILIUM_ASSEMBLY	GO_REGULATION_OF_CILIUM_ASSEMBLY	Details ...	45	-0.356859	-1.36123	0.077821	1	1	4398	tags=49%, list=25%, signal=65%
GO_OLIGODENDROCYTE_DIFFERENTIATION	GO_OLIGODENDROCYTE_DIFFERENTIATION	Details ...	57	-0.383076	-1.36046	0.0882353	1	1	5933	tags=42%, list=34%, signal=63%
GO_REGULATION_OF_BLOOD_VESSEL_ENDOTHELIAL_CELL_MIGRATION	GO_REGULATION_OF_BLOOD_VESSEL_ENDOTHELIAL_CELL_MIGRATION	Details ...	48	-0.394691	-1.35941	0.14257	1	1	4400	tags=44%, list=25%, signal=58%
GO_CELLULAR_RESPONSE_TO_EPIDERMAL_GROWTH_FACTOR_STIMULUS	GO_CELLULAR_RESPONSE_TO_EPIDERMAL_GROWTH_FACTOR_STIMULUS	Details ...	23	-0.437361	-1.35902	0.115768	1	1	4084	tags=48%, list=23%, signal=62%
GO_REGULATION_OF_RENAL_SODIUM_EXCRETION	GO_REGULATION_OF_RENAL_SODIUM_EXCRETION	Details ...	20	-0.480168	-1.35723	0.142578	1	1	4541	tags=30%, list=26%, signal=40%
GO_POSITIVE_REGULATION_OF_CALCIUM_ION_IMPORT	GO_POSITIVE_REGULATION_OF_CALCIUM_ION_IMPORT	Details ...	50	-0.394489	-1.35696	0.0936255	1	1	4278	tags=34%, list=24%, signal=45%
GO_HEPARAN_SULFATE_PROTEOGLYCAN_METABOLIC_PROCESS	GO_HEPARAN_SULFATE_PROTEOGLYCAN_METABOLIC_PROCESS	Details ...	28	-0.434637	-1.35615	0.135081	1	1	2217	tags=29%, list=13%, signal=33%
GO_POSITIVE_REGULATION_OF_AXONOGENESIS	GO_POSITIVE_REGULATION_OF_AXONOGENESIS	Details ...	68	-0.384285	-1.35541	0.126679	1	1	4334	tags=43%, list=25%, signal=56%
GO_CARBOHYDRATE_KINASE_ACTIVITY	GO_CARBOHYDRATE_KINASE_ACTIVITY	Details ...	19	-0.48651	-1.35516	0.170124	1	1	4575	tags=53%, list=26%, signal=71%
GO_NEGATIVE_REGULATION_OF_MUSCLE_TISSUE_DEVELOPMENT	GO_NEGATIVE_REGULATION_OF_MUSCLE_TISSUE_DEVELOPMENT	Details ...	35	-0.435709	-1.35266	0.128834	1	1	6315	tags=54%, list=36%, signal=84%
GO_TRIGLYCERIDE_CATABOLIC_PROCESS	GO_TRIGLYCERIDE_CATABOLIC_PROCESS	Details ...	18	-0.484507	-1.35093	0.126761	1	1	7250	tags=56%, list=41%, signal=94%
GO_CHRONIC_INFLAMMATORY_RESPONSE	GO_CHRONIC_INFLAMMATORY_RESPONSE	Details ...	15	-0.548578	-1.35041	0.164271	1	1	5359	tags=53%, list=30%, signal=77%
GO_REGULATION_OF_CATENIN_IMPORT_INTO_NUCLEUS	GO_REGULATION_OF_CATENIN_IMPORT_INTO_NUCLEUS	Details ...	27	-0.436152	-1.3475	0.136179	1	1	6201	tags=56%, list=35%, signal=85%
GO_NEGATIVE_REGULATION_OF_INFLAMMATORY_RESPONSE	GO_NEGATIVE_REGULATION_OF_INFLAMMATORY_RESPONSE	Details ...	88	-0.396879	-1.34616	0.153535	1	1	5598	tags=51%, list=32%, signal=74%
GO_ACTIN_FILAMENT_POLYMERIZATION	GO_ACTIN_FILAMENT_POLYMERIZATION	Details ...	21	-0.449597	-1.34612	0.129032	1	1	2930	tags=38%, list=17%, signal=46%
GO_RAB_GUANYL_NUCLEOTIDE_EXCHANGE_FACTOR_ACTIVITY	GO_RAB_GUANYL_NUCLEOTIDE_EXCHANGE_FACTOR_ACTIVITY	Details ...	27	-0.432663	-1.34582	0.15748	1	1	2654	tags=48%, list=15%, signal=57%
GO_POSITIVE_REGULATION_OF_CELL_ADHESION_MEDIATED_BY_INTEGRIN	GO_POSITIVE_REGULATION_OF_CELL_ADHESION_MEDIATED_BY_INTEGRIN	Details ...	17	-0.484549	-1.34502	0.16047	1	1	4385	tags=47%, list=25%, signal=63%
GO_REGULATION_OF_TRANSCRIPTION_FROM_RNA_POLYMERASE_III_PROMOTER	GO_REGULATION_OF_TRANSCRIPTION_FROM_RNA_POLYMERASE_III_PROMOTER	Details ...	20	-0.431798	-1.34456	0.124736	1	1	2083	tags=35%, list=12%, signal=40%
GO_REGULATION_OF_FATTY_ACID_OXIDATION	GO_REGULATION_OF_FATTY_ACID_OXIDATION	Details ...	27	-0.416291	-1.34153	0.129943	1	1	4049	tags=44%, list=23%, signal=58%
GO_NEGATIVE_REGULATION_OF_AXONOGENESIS	GO_NEGATIVE_REGULATION_OF_AXONOGENESIS	Details ...	64	-0.358126	-1.33994	0.120594	1	1	5598	tags=50%, list=32%, signal=73%
GO_PLATELET_ALPHA_GRANULE_LUMEN	GO_PLATELET_ALPHA_GRANULE_LUMEN	Details ...	54	-0.419725	-1.33915	0.167002	1	1	6364	tags=52%, list=36%, signal=81%
GO_MACROMOLECULAR_COMPLEX_REMODELING	GO_MACROMOLECULAR_COMPLEX_REMODELING	Details ...	23	-0.449149	-1.33865	0.13843	1	1	4133	tags=30%, list=23%, signal=40%
GO_SEX_DETERMINATION	GO_SEX_DETERMINATION	Details ...	20	-0.458533	-1.33764	0.12549	1	1	7142	tags=55%, list=40%, signal=92%
GO_RESPONSE_TO_ANGIOTENSIN	GO_RESPONSE_TO_ANGIOTENSIN	Details ...	16	-0.457617	-1.33757	0.122093	1	1	4240	tags=44%, list=24%, signal=58%
GO_GLUCOSE_CATABOLIC_PROCESS	GO_GLUCOSE_CATABOLIC_PROCESS	Details ...	26	-0.505497	-1.33699	0.204211	1	1	5943	tags=73%, list=34%, signal=110%
GO_POSITIVE_REGULATION_OF_VIRAL_TRANSCRIPTION	GO_POSITIVE_REGULATION_OF_VIRAL_TRANSCRIPTION	Details ...	35	-0.398081	-1.33648	0.141988	1	1	2216	tags=40%, list=13%, signal=46%
GO_BLOOD_COAGULATION_FIBRIN_CLOT_FORMATION	GO_BLOOD_COAGULATION_FIBRIN_CLOT_FORMATION	Details ...	23	-0.454694	-1.33619	0.160853	1	1	4574	tags=35%, list=26%, signal=47%
GO_FIBRIL_ORGANIZATION	GO_FIBRIL_ORGANIZATION	Details ...	19	-0.520059	-1.33454	0.198428	1	1	5673	tags=68%, list=32%, signal=101%
GO_POSITIVE_REGULATION_OF_INTERLEUKIN_4_PRODUCTION	GO_POSITIVE_REGULATION_OF_INTERLEUKIN_4_PRODUCTION	Details ...	22	-0.499656	-1.3343	0.172211	1	1	4346	tags=50%, list=25%, signal=66%
GO_APOPTOTIC_PROCESS_INVOLVED_IN_DEVELOPMENT	GO_APOPTOTIC_PROCESS_INVOLVED_IN_DEVELOPMENT	Details ...	20	-0.46272	-1.33307	0.141454	1	1	3111	tags=35%, list=18%, signal=42%
GO_CYCLASE_ACTIVITY	GO_CYCLASE_ACTIVITY	Details ...	19	-0.488801	-1.33218	0.173333	1	1	4182	tags=42%, list=24%, signal=55%
GO_HIGH_DENSITY_LIPOPROTEIN_PARTICLE_REMODELING	GO_HIGH_DENSITY_LIPOPROTEIN_PARTICLE_REMODELING	Details ...	15	-0.502192	-1.33203	0.130802	1	1	4133	tags=40%, list=23%, signal=52%
GO_REGULATION_OF_PROTEIN_TARGETING_TO_MITOCHONDRION	GO_REGULATION_OF_PROTEIN_TARGETING_TO_MITOCHONDRION	Details ...	89	-0.325135	-1.33188	0.0763052	1	1	3229	tags=33%, list=18%, signal=40%
GO_PROTEIN_AUTOPHOSPHORYLATION	GO_PROTEIN_AUTOPHOSPHORYLATION	Details ...	188	-0.327309	-1.33169	0.128968	1	1	2833	tags=27%, list=16%, signal=31%
GO_REGULATION_OF_WATER_LOSS_VIA_SKIN	GO_REGULATION_OF_WATER_LOSS_VIA_SKIN	Details ...	18	-0.520961	-1.3309	0.167015	1	1	6096	tags=61%, list=35%, signal=93%
GO_DEACETYLASE_ACTIVITY	GO_DEACETYLASE_ACTIVITY	Details ...	54	-0.349908	-1.3302	0.114688	1	1	2010	tags=30%, list=11%, signal=33%
GO_POSITIVE_REGULATION_OF_ANTIGEN_PROCESSING_AND_PRESENTATION	GO_POSITIVE_REGULATION_OF_ANTIGEN_PROCESSING_AND_PRESENTATION	Details ...	16	-0.513791	-1.32901	0.140244	1	1	7170	tags=75%, list=41%, signal=126%
GO_STRESS_ACTIVATED_PROTEIN_KINASE_SIGNALING_CASCADE	GO_STRESS_ACTIVATED_PROTEIN_KINASE_SIGNALING_CASCADE	Details ...	99	-0.326118	-1.3288	0.101562	1	1	3079	tags=34%, list=17%, signal=41%
GO_RENAL_SYSTEM_VASCULATURE_DEVELOPMENT	GO_RENAL_SYSTEM_VASCULATURE_DEVELOPMENT	Details ...	19	-0.572922	-1.32847	0.211132	1	1	5411	tags=58%, list=31%, signal=83%
GO_COATED_PIT	GO_COATED_PIT	Details ...	65	-0.342244	-1.32754	0.118812	1	1	2088	tags=29%, list=12%, signal=33%
GO_JNK_CASCADE	GO_JNK_CASCADE	Details ...	79	-0.336058	-1.32667	0.114563	1	1	5104	tags=49%, list=29%, signal=69%
GO_REGULATION_OF_MYOTUBE_DIFFERENTIATION	GO_REGULATION_OF_MYOTUBE_DIFFERENTIATION	Details ...	47	-0.369735	-1.32634	0.12831	1	1	2942	tags=26%, list=17%, signal=31%
GO_POSITIVE_REGULATION_OF_STRIATED_MUSCLE_CONTRACTION	GO_POSITIVE_REGULATION_OF_STRIATED_MUSCLE_CONTRACTION	Details ...	15	-0.438724	-1.32531	0.147705	1	1	6290	tags=67%, list=36%, signal=103%
GO_POSITIVE_REGULATION_OF_PROTEIN_ACETYLATION	GO_POSITIVE_REGULATION_OF_PROTEIN_ACETYLATION	Details ...	35	-0.37089	-1.32143	0.120079	1	1	5157	tags=49%, list=29%, signal=68%
GO_REGULATION_OF_EXCRETION	GO_REGULATION_OF_EXCRETION	Details ...	25	-0.445601	-1.32103	0.149805	1	1	4541	tags=28%, list=26%, signal=38%
GO_POSITIVE_REGULATION_OF_RELEASE_OF_SEQUESTERED_CALCIUM_ION_INTO_CYTOSOL	GO_POSITIVE_REGULATION_OF_RELEASE_OF_SEQUESTERED_CALCIUM_ION_INTO_CYTOSOL	Details ...	36	-0.3956	-1.31693	0.12326	1	1	2315	tags=25%, list=13%, signal=29%
GO_REGULATION_OF_CHEMOTAXIS	GO_REGULATION_OF_CHEMOTAXIS	Details ...	174	-0.372656	-1.31514	0.169043	1	1	5807	tags=47%, list=33%, signal=70%
GO_OLIGODENDROCYTE_DEVELOPMENT	GO_OLIGODENDROCYTE_DEVELOPMENT	Details ...	32	-0.395764	-1.31427	0.157791	1	1	3393	tags=28%, list=19%, signal=35%
GO_NEGATIVE_REGULATION_OF_VIRAL_ENTRY_INTO_HOST_CELL	GO_NEGATIVE_REGULATION_OF_VIRAL_ENTRY_INTO_HOST_CELL	Details ...	16	-0.468352	-1.31347	0.156504	1	1	3526	tags=50%, list=20%, signal=62%
GO_POSITIVE_REGULATION_OF_EPIDERMIS_DEVELOPMENT	GO_POSITIVE_REGULATION_OF_EPIDERMIS_DEVELOPMENT	Details ...	31	-0.393871	-1.31263	0.135354	1	1	6503	tags=55%, list=37%, signal=87%
GO_SECRETORY_GRANULE_LUMEN	GO_SECRETORY_GRANULE_LUMEN	Details ...	77	-0.396447	-1.31216	0.152893	1	1	6694	tags=55%, list=38%, signal=87%
GO_POSITIVE_REGULATION_OF_CHROMATIN_MODIFICATION	GO_POSITIVE_REGULATION_OF_CHROMATIN_MODIFICATION	Details ...	80	-0.323669	-1.30835	0.129293	1	1	1631	tags=23%, list=9%, signal=25%
GO_EPITHELIAL_CELL_MORPHOGENESIS	GO_EPITHELIAL_CELL_MORPHOGENESIS	Details ...	42	-0.395102	-1.30816	0.176471	1	1	4954	tags=40%, list=28%, signal=56%
GO_HISTONE_METHYLTRANSFERASE_ACTIVITY	GO_HISTONE_METHYLTRANSFERASE_ACTIVITY	Details ...	45	-0.363144	-1.3077	0.160321	1	1	2233	tags=31%, list=13%, signal=36%
GO_NEGATIVE_REGULATION_OF_GROWTH	GO_NEGATIVE_REGULATION_OF_GROWTH	Details ...	226	-0.301664	-1.30395	0.104536	1	1	5956	tags=45%, list=34%, signal=67%
GO_RESPONSE_TO_TESTOSTERONE	GO_RESPONSE_TO_TESTOSTERONE	Details ...	37	-0.350535	-1.30295	0.13617	1	1	4826	tags=43%, list=27%, signal=59%
GO_REGULATION_OF_INTERLEUKIN_13_PRODUCTION	GO_REGULATION_OF_INTERLEUKIN_13_PRODUCTION	Details ...	15	-0.469692	-1.30274	0.138402	1	1	4549	tags=47%, list=26%, signal=63%
GO_LIPID_PARTICLE	GO_LIPID_PARTICLE	Details ...	60	-0.367412	-1.30088	0.170431	1	1	4369	tags=48%, list=25%, signal=64%
GO_HEPARAN_SULFATE_PROTEOGLYCAN_BINDING	GO_HEPARAN_SULFATE_PROTEOGLYCAN_BINDING	Details ...	18	-0.47679	-1.29979	0.169202	1	1	6770	tags=61%, list=38%, signal=99%
GO_COP9_SIGNALOSOME	GO_COP9_SIGNALOSOME	Details ...	31	-0.369122	-1.29839	0.140496	1	1	2398	tags=32%, list=14%, signal=37%
GO_CLATHRIN_COAT_OF_COATED_PIT	GO_CLATHRIN_COAT_OF_COATED_PIT	Details ...	16	-0.442925	-1.29536	0.191406	1	1	2071	tags=38%, list=12%, signal=42%
GO_SERINE_HYDROLASE_ACTIVITY	GO_SERINE_HYDROLASE_ACTIVITY	Details ...	199	-0.328019	-1.29502	0.123506	1	1	5619	tags=42%, list=32%, signal=61%
GO_ANCHORED_COMPONENT_OF_PLASMA_MEMBRANE	GO_ANCHORED_COMPONENT_OF_PLASMA_MEMBRANE	Details ...	36	-0.401465	-1.29462	0.156904	1	1	6172	tags=50%, list=35%, signal=77%
GO_NEUROTRANSMITTER_SODIUM_SYMPORTER_ACTIVITY	GO_NEUROTRANSMITTER_SODIUM_SYMPORTER_ACTIVITY	Details ...	18	-0.464367	-1.29392	0.162791	1	1	8456	tags=83%, list=48%, signal=160%
GO_REGULATION_OF_RESPONSE_TO_CYTOKINE_STIMULUS	GO_REGULATION_OF_RESPONSE_TO_CYTOKINE_STIMULUS	Details ...	123	-0.321232	-1.29384	0.155206	1	1	4607	tags=41%, list=26%, signal=56%
GO_REGULATION_OF_CELL_PROJECTION_ASSEMBLY	GO_REGULATION_OF_CELL_PROJECTION_ASSEMBLY	Details ...	137	-0.308986	-1.29357	0.135029	1	1	4722	tags=45%, list=27%, signal=61%
GO_PLATELET_MORPHOGENESIS	GO_PLATELET_MORPHOGENESIS	Details ...	18	-0.432635	-1.29111	0.162055	1	1	3693	tags=44%, list=21%, signal=56%
GO_NADH_METABOLIC_PROCESS	GO_NADH_METABOLIC_PROCESS	Details ...	32	-0.472333	-1.29042	0.230928	1	1	6004	tags=72%, list=34%, signal=109%
GO_LATERAL_PLASMA_MEMBRANE	GO_LATERAL_PLASMA_MEMBRANE	Details ...	48	-0.357884	-1.28985	0.137597	1	1	939	tags=21%, list=5%, signal=22%
GO_LIGAND_DEPENDENT_NUCLEAR_RECEPTOR_TRANSCRIPTION_COACTIVATOR_ACTIVITY	GO_LIGAND_DEPENDENT_NUCLEAR_RECEPTOR_TRANSCRIPTION_COACTIVATOR_ACTIVITY	Details ...	51	-0.32556	-1.28979	0.132797	1	1	3439	tags=33%, list=19%, signal=41%
GO_HISTONE_LYSINE_N_METHYLTRANSFERASE_ACTIVITY	GO_HISTONE_LYSINE_N_METHYLTRANSFERASE_ACTIVITY	Details ...	32	-0.383913	-1.28838	0.179641	1	1	1243	tags=28%, list=7%, signal=30%
GO_PEROXISOME_PROLIFERATOR_ACTIVATED_RECEPTOR_BINDING	GO_PEROXISOME_PROLIFERATOR_ACTIVATED_RECEPTOR_BINDING	Details ...	15	-0.46961	-1.28714	0.207585	1	1	3693	tags=53%, list=21%, signal=67%
GO_PROTEIN_KINASE_B_SIGNALING	GO_PROTEIN_KINASE_B_SIGNALING	Details ...	34	-0.395965	-1.28671	0.150289	1	1	4266	tags=44%, list=24%, signal=58%
GO_RESPONSE_TO_VITAMIN_A	GO_RESPONSE_TO_VITAMIN_A	Details ...	18	-0.438763	-1.28659	0.169323	1	1	1958	tags=28%, list=11%, signal=31%
GO_RETINOIC_ACID_RECEPTOR_BINDING	GO_RETINOIC_ACID_RECEPTOR_BINDING	Details ...	28	-0.400674	-1.28588	0.184584	1	1	3439	tags=39%, list=19%, signal=49%
GO_REGULATION_OF_INFLAMMATORY_RESPONSE_TO_ANTIGENIC_STIMULUS	GO_REGULATION_OF_INFLAMMATORY_RESPONSE_TO_ANTIGENIC_STIMULUS	Details ...	17	-0.531595	-1.2848	0.224949	1	1	5280	tags=47%, list=30%, signal=67%
GO_HEPARAN_SULFATE_PROTEOGLYCAN_BIOSYNTHETIC_PROCESS	GO_HEPARAN_SULFATE_PROTEOGLYCAN_BIOSYNTHETIC_PROCESS	Details ...	23	-0.418486	-1.28477	0.172691	1	1	2217	tags=26%, list=13%, signal=30%
GO_HEXOSE_CATABOLIC_PROCESS	GO_HEXOSE_CATABOLIC_PROCESS	Details ...	44	-0.422628	-1.28367	0.214137	1	1	5943	tags=61%, list=34%, signal=92%
GO_REGULATION_OF_VIRAL_TRANSCRIPTION	GO_REGULATION_OF_VIRAL_TRANSCRIPTION	Details ...	57	-0.338318	-1.28322	0.15	1	1	2842	tags=33%, list=16%, signal=40%
GO_PEPTIDE_HORMONE_PROCESSING	GO_PEPTIDE_HORMONE_PROCESSING	Details ...	28	-0.41182	-1.28249	0.18146	1	1	6216	tags=54%, list=35%, signal=83%
GO_REGULATION_OF_PROTEIN_BINDING	GO_REGULATION_OF_PROTEIN_BINDING	Details ...	166	-0.283883	-1.28205	0.116279	1	1	2469	tags=22%, list=14%, signal=26%
GO_POSITIVE_REGULATION_OF_B_CELL_MEDIATED_IMMUNITY	GO_POSITIVE_REGULATION_OF_B_CELL_MEDIATED_IMMUNITY	Details ...	23	-0.453533	-1.28146	0.241107	1	1	7214	tags=65%, list=41%, signal=110%
GO_REGULATION_OF_VASODILATION	GO_REGULATION_OF_VASODILATION	Details ...	44	-0.382461	-1.28071	0.146484	1	1	5949	tags=55%, list=34%, signal=82%
GO_POSITIVE_REGULATION_OF_CALCIUM_ION_TRANSPORT	GO_POSITIVE_REGULATION_OF_CALCIUM_ION_TRANSPORT	Details ...	100	-0.346002	-1.27996	0.174442	1	1	4278	tags=29%, list=24%, signal=38%
GO_RECEPTOR_ACTIVATOR_ACTIVITY	GO_RECEPTOR_ACTIVATOR_ACTIVITY	Details ...	31	-0.37983	-1.27882	0.131959	1	1	6301	tags=52%, list=36%, signal=80%
GO_REGULATION_OF_CYTOKINE_PRODUCTION_INVOLVED_IN_INFLAMMATORY_RESPONSE	GO_REGULATION_OF_CYTOKINE_PRODUCTION_INVOLVED_IN_INFLAMMATORY_RESPONSE	Details ...	18	-0.477332	-1.27716	0.185771	1	1	5949	tags=67%, list=34%, signal=100%
GO_NEGATIVE_REGULATION_OF_RESPONSE_TO_CYTOKINE_STIMULUS	GO_NEGATIVE_REGULATION_OF_RESPONSE_TO_CYTOKINE_STIMULUS	Details ...	41	-0.370938	-1.27702	0.158537	1	1	5807	tags=56%, list=33%, signal=83%
GO_LYMPHOCYTE_MIGRATION	GO_LYMPHOCYTE_MIGRATION	Details ...	47	-0.450396	-1.27653	0.240557	1	1	6338	tags=49%, list=36%, signal=76%
GO_14_3_3_PROTEIN_BINDING	GO_14_3_3_PROTEIN_BINDING	Details ...	19	-0.423013	-1.27559	0.189555	1	1	1667	tags=32%, list=9%, signal=35%
GO_CARBOHYDRATE_PHOSPHORYLATION	GO_CARBOHYDRATE_PHOSPHORYLATION	Details ...	20	-0.444076	-1.27417	0.189076	1	1	4490	tags=50%, list=25%, signal=67%
GO_REGULATION_OF_ASTROCYTE_DIFFERENTIATION	GO_REGULATION_OF_ASTROCYTE_DIFFERENTIATION	Details ...	26	-0.403635	-1.27348	0.173824	1	1	2529	tags=31%, list=14%, signal=36%
GO_RESPONSE_TO_KETONE	GO_RESPONSE_TO_KETONE	Details ...	176	-0.302535	-1.27288	0.142285	1	1	6131	tags=50%, list=35%, signal=76%
GO_DEVELOPMENTAL_PROGRAMMED_CELL_DEATH	GO_DEVELOPMENTAL_PROGRAMMED_CELL_DEATH	Details ...	26	-0.403007	-1.2718	0.162272	1	1	3111	tags=31%, list=18%, signal=37%
GO_RESPONSE_TO_UV_B	GO_RESPONSE_TO_UV_B	Details ...	16	-0.4315	-1.27117	0.138365	1	1	1392	tags=25%, list=8%, signal=27%
GO_NEGATIVE_REGULATION_OF_FIBROBLAST_PROLIFERATION	GO_NEGATIVE_REGULATION_OF_FIBROBLAST_PROLIFERATION	Details ...	27	-0.381381	-1.26977	0.163306	1	1	2963	tags=44%, list=17%, signal=53%
GO_NUCLEAR_OUTER_MEMBRANE	GO_NUCLEAR_OUTER_MEMBRANE	Details ...	17	-0.430812	-1.26957	0.185714	1	1	3385	tags=41%, list=19%, signal=51%
GO_REGULATION_OF_SYSTEMIC_ARTERIAL_BLOOD_PRESSURE_BY_HORMONE	GO_REGULATION_OF_SYSTEMIC_ARTERIAL_BLOOD_PRESSURE_BY_HORMONE		33	-0.398792	-1.26931	0.185824	1	1	5933	tags=45%, list=34%, signal=68%
GO_VESICLE_LUMEN	GO_VESICLE_LUMEN		98	-0.362112	-1.26898	0.176715	1	1	6694	tags=51%, list=38%, signal=82%
GO_RESPONSE_TO_PROTOZOAN	GO_RESPONSE_TO_PROTOZOAN		19	-0.481853	-1.26847	0.227898	1	1	5110	tags=47%, list=29%, signal=67%
GO_HISTONE_DEACETYLASE_BINDING	GO_HISTONE_DEACETYLASE_BINDING		100	-0.305354	-1.2671	0.151515	1	1	3130	tags=32%, list=18%, signal=39%
GO_DERMATAN_SULFATE_PROTEOGLYCAN_METABOLIC_PROCESS	GO_DERMATAN_SULFATE_PROTEOGLYCAN_METABOLIC_PROCESS		16	-0.509271	-1.26709	0.225352	1	1	3060	tags=31%, list=17%, signal=38%
GO_POSITIVE_REGULATION_OF_STRESS_ACTIVATED_PROTEIN_KINASE_SIGNALING_CASCADE	GO_POSITIVE_REGULATION_OF_STRESS_ACTIVATED_PROTEIN_KINASE_SIGNALING_CASCADE		132	-0.306441	-1.26666	0.156627	1	1	3953	tags=35%, list=22%, signal=45%
GO_NEGATIVE_REGULATION_OF_NEURAL_PRECURSOR_CELL_PROLIFERATION	GO_NEGATIVE_REGULATION_OF_NEURAL_PRECURSOR_CELL_PROLIFERATION		20	-0.421443	-1.26263	0.177481	1	1	4947	tags=55%, list=28%, signal=76%
GO_POSITIVE_REGULATION_OF_CHONDROCYTE_DIFFERENTIATION	GO_POSITIVE_REGULATION_OF_CHONDROCYTE_DIFFERENTIATION		19	-0.457899	-1.26257	0.223507	1	1	5940	tags=53%, list=34%, signal=79%
GO_POSITIVE_REGULATION_OF_ACTIN_CYTOSKELETON_REORGANIZATION	GO_POSITIVE_REGULATION_OF_ACTIN_CYTOSKELETON_REORGANIZATION		16	-0.463219	-1.26225	0.198397	1	1	6772	tags=75%, list=38%, signal=122%
GO_NEGATIVE_REGULATION_OF_DEFENSE_RESPONSE	GO_NEGATIVE_REGULATION_OF_DEFENSE_RESPONSE		130	-0.348084	-1.2618	0.199211	1	1	5598	tags=48%, list=32%, signal=69%
GO_REGULATION_OF_GRANULOCYTE_CHEMOTAXIS	GO_REGULATION_OF_GRANULOCYTE_CHEMOTAXIS		36	-0.440603	-1.26026	0.228682	1	1	5713	tags=58%, list=32%, signal=86%
GO_NEUROTRANSMITTER_TRANSPORTER_ACTIVITY	GO_NEUROTRANSMITTER_TRANSPORTER_ACTIVITY		23	-0.442756	-1.25986	0.210317	1	1	6937	tags=61%, list=39%, signal=100%
GO_RESPONSE_TO_ACIDIC_PH	GO_RESPONSE_TO_ACIDIC_PH		16	-0.435907	-1.25962	0.196154	1	1	3574	tags=44%, list=20%, signal=55%
GO_EXTRACELLULAR_MATRIX	GO_EXTRACELLULAR_MATRIX		402	-0.378228	-1.25881	0.240964	1	1	6000	tags=48%, list=34%, signal=71%
GO_REVERSE_CHOLESTEROL_TRANSPORT	GO_REVERSE_CHOLESTEROL_TRANSPORT		16	-0.453035	-1.25834	0.170732	1	1	4133	tags=38%, list=23%, signal=49%
GO_PROTEIN_SERINE_THREONINE_TYROSINE_KINASE_ACTIVITY	GO_PROTEIN_SERINE_THREONINE_TYROSINE_KINASE_ACTIVITY		39	-0.33416	-1.25749	0.149402	1	1	4024	tags=41%, list=23%, signal=53%
GO_ACTIVATION_OF_PROTEIN_KINASE_A_ACTIVITY	GO_ACTIVATION_OF_PROTEIN_KINASE_A_ACTIVITY		16	-0.452679	-1.25714	0.198842	1	1	4182	tags=56%, list=24%, signal=74%
GO_NEGATIVE_REGULATION_OF_INNATE_IMMUNE_RESPONSE	GO_NEGATIVE_REGULATION_OF_INNATE_IMMUNE_RESPONSE		36	-0.416834	-1.25666	0.239919	1	1	5162	tags=44%, list=29%, signal=63%
GO_OSTEOBLAST_DEVELOPMENT	GO_OSTEOBLAST_DEVELOPMENT		18	-0.435163	-1.25564	0.176238	1	1	5940	tags=56%, list=34%, signal=84%
GO_RECEPTOR_SIGNALING_COMPLEX_SCAFFOLD_ACTIVITY	GO_RECEPTOR_SIGNALING_COMPLEX_SCAFFOLD_ACTIVITY		23	-0.406098	-1.25563	0.205589	1	1	2786	tags=39%, list=16%, signal=46%
GO_COFACTOR_CATABOLIC_PROCESS	GO_COFACTOR_CATABOLIC_PROCESS		20	-0.444687	-1.25531	0.200811	1	1	3337	tags=40%, list=19%, signal=49%
GO_NEURON_CELL_CELL_ADHESION	GO_NEURON_CELL_CELL_ADHESION		16	-0.527173	-1.25502	0.242308	1	1	6753	tags=56%, list=38%, signal=91%
GO_CELL_VOLUME_HOMEOSTASIS	GO_CELL_VOLUME_HOMEOSTASIS		27	-0.392898	-1.25495	0.206166	1	1	4107	tags=41%, list=23%, signal=53%
GO_NEUROTROPHIN_TRK_RECEPTOR_SIGNALING_PATHWAY	GO_NEUROTROPHIN_TRK_RECEPTOR_SIGNALING_PATHWAY		15	-0.431787	-1.25476	0.200393	1	1	4577	tags=67%, list=26%, signal=90%
GO_REGULATION_OF_INTERLEUKIN_1_BETA_PRODUCTION	GO_REGULATION_OF_INTERLEUKIN_1_BETA_PRODUCTION		45	-0.39757	-1.25316	0.229209	1	1	3076	tags=31%, list=17%, signal=38%
GO_RNA_POLYMERASE_II_DISTAL_ENHANCER_SEQUENCE_SPECIFIC_DNA_BINDING	GO_RNA_POLYMERASE_II_DISTAL_ENHANCER_SEQUENCE_SPECIFIC_DNA_BINDING		62	-0.324284	-1.25214	0.156863	1	1	2448	tags=29%, list=14%, signal=34%
GO_LIPID_HOMEOSTASIS	GO_LIPID_HOMEOSTASIS		102	-0.299821	-1.25073	0.171937	1	1	4147	tags=36%, list=23%, signal=47%
GO_POSITIVE_CHEMOTAXIS	GO_POSITIVE_CHEMOTAXIS		35	-0.377153	-1.24908	0.18609	1	1	4135	tags=31%, list=23%, signal=41%
GO_REGULATION_OF_ANTIGEN_PROCESSING_AND_PRESENTATION	GO_REGULATION_OF_ANTIGEN_PROCESSING_AND_PRESENTATION		23	-0.469035	-1.24836	0.23374	1	1	7170	tags=78%, list=41%, signal=132%
GO_CELL_CELL_ADHERENS_JUNCTION	GO_CELL_CELL_ADHERENS_JUNCTION		50	-0.378162	-1.24772	0.2249	1	1	5288	tags=48%, list=30%, signal=68%
GO_PLATELET_ACTIVATION	GO_PLATELET_ACTIVATION		139	-0.325209	-1.24771	0.220238	1	1	5117	tags=40%, list=29%, signal=55%
GO_CYTOPLASMIC_PATTERN_RECOGNITION_RECEPTOR_SIGNALING_PATHWAY	GO_CYTOPLASMIC_PATTERN_RECOGNITION_RECEPTOR_SIGNALING_PATHWAY		32	-0.366465	-1.24675	0.206767	1	1	2932	tags=41%, list=17%, signal=49%
GO_GOLGI_LUMEN	GO_GOLGI_LUMEN		83	-0.348266	-1.24656	0.195609	1	1	6685	tags=55%, list=38%, signal=89%
GO_RESPONSE_TO_PROGESTERONE	GO_RESPONSE_TO_PROGESTERONE		48	-0.379348	-1.24628	0.188976	1	1	5772	tags=54%, list=33%, signal=80%
GO_ACTOMYOSIN	GO_ACTOMYOSIN		57	-0.405201	-1.2462	0.244618	1	1	2284	tags=28%, list=13%, signal=32%
GO_NEGATIVE_REGULATION_OF_CELL_MORPHOGENESIS_INVOLVED_IN_DIFFERENTIATION	GO_NEGATIVE_REGULATION_OF_CELL_MORPHOGENESIS_INVOLVED_IN_DIFFERENTIATION		113	-0.308282	-1.24567	0.157282	1	1	5120	tags=42%, list=29%, signal=58%
GO_TUMOR_NECROSIS_FACTOR_RECEPTOR_BINDING	GO_TUMOR_NECROSIS_FACTOR_RECEPTOR_BINDING		29	-0.435751	-1.24418	0.23494	1	1	3916	tags=45%, list=22%, signal=58%
GO_REGULATION_OF_TYPE_I_INTERFERON_MEDIATED_SIGNALING_PATHWAY	GO_REGULATION_OF_TYPE_I_INTERFERON_MEDIATED_SIGNALING_PATHWAY		24	-0.397841	-1.244	0.205078	1	1	4217	tags=46%, list=24%, signal=60%
GO_REGULATION_OF_PROTEIN_TARGETING	GO_REGULATION_OF_PROTEIN_TARGETING		282	-0.260057	-1.24286	0.126	1	1	3933	tags=32%, list=22%, signal=40%
GO_KINESIN_BINDING	GO_KINESIN_BINDING		30	-0.390654	-1.24245	0.199593	1	1	4835	tags=50%, list=27%, signal=69%
GO_CYTOPLASMIC_SEQUESTERING_OF_PROTEIN	GO_CYTOPLASMIC_SEQUESTERING_OF_PROTEIN		40	-0.343786	-1.24181	0.211881	1	1	2741	tags=33%, list=16%, signal=38%
GO_NEURAL_CREST_CELL_MIGRATION	GO_NEURAL_CREST_CELL_MIGRATION		50	-0.373136	-1.24147	0.206226	1	1	5153	tags=42%, list=29%, signal=59%
GO_REGULATION_OF_ENDOTHELIAL_CELL_MIGRATION	GO_REGULATION_OF_ENDOTHELIAL_CELL_MIGRATION		106	-0.340143	-1.24117	0.237094	1	1	5123	tags=44%, list=29%, signal=62%
GO_PROTEOGLYCAN_BINDING	GO_PROTEOGLYCAN_BINDING		27	-0.44655	-1.24039	0.252485	1	1	6239	tags=59%, list=35%, signal=91%
GO_ADHERENS_JUNCTION_ORGANIZATION	GO_ADHERENS_JUNCTION_ORGANIZATION		64	-0.360777	-1.24004	0.197605	1	1	4551	tags=41%, list=26%, signal=55%
GO_RETINOIC_ACID_RECEPTOR_SIGNALING_PATHWAY	GO_RETINOIC_ACID_RECEPTOR_SIGNALING_PATHWAY		17	-0.411015	-1.23941	0.222445	1	1	3289	tags=35%, list=19%, signal=43%
GO_REGULATION_OF_PHOSPHOLIPID_METABOLIC_PROCESS	GO_REGULATION_OF_PHOSPHOLIPID_METABOLIC_PROCESS		58	-0.347845	-1.23937	0.210736	1	1	7026	tags=60%, list=40%, signal=100%
GO_NEGATIVE_REGULATION_OF_OXIDATIVE_STRESS_INDUCED_INTRINSIC_APOPTOTIC_SIGNALING_PATHWAY	GO_NEGATIVE_REGULATION_OF_OXIDATIVE_STRESS_INDUCED_INTRINSIC_APOPTOTIC_SIGNALING_PATHWAY		19	-0.384885	-1.23743	0.209205	1	1	3149	tags=42%, list=18%, signal=51%
GO_ANCHORED_COMPONENT_OF_MEMBRANE	GO_ANCHORED_COMPONENT_OF_MEMBRANE		134	-0.320623	-1.23641	0.196078	1	1	7824	tags=58%, list=44%, signal=104%
GO_POSITIVE_REGULATION_OF_CALCIUM_ION_TRANSPORT_INTO_CYTOSOL	GO_POSITIVE_REGULATION_OF_CALCIUM_ION_TRANSPORT_INTO_CYTOSOL		49	-0.362506	-1.23567	0.215886	1	1	2553	tags=22%, list=14%, signal=26%
GO_REGULATION_OF_RECEPTOR_RECYCLING	GO_REGULATION_OF_RECEPTOR_RECYCLING		19	-0.404677	-1.23346	0.215116	1	1	1220	tags=26%, list=7%, signal=28%
GO_REGULATION_OF_CELLULAR_RESPONSE_TO_INSULIN_STIMULUS	GO_REGULATION_OF_CELLULAR_RESPONSE_TO_INSULIN_STIMULUS		55	-0.317283	-1.23194	0.168605	1	1	1693	tags=25%, list=10%, signal=28%
GO_NEGATIVE_REGULATION_OF_RESPONSE_TO_EXTERNAL_STIMULUS	GO_NEGATIVE_REGULATION_OF_RESPONSE_TO_EXTERNAL_STIMULUS		253	-0.309049	-1.23147	0.207171	1	1	5598	tags=44%, list=32%, signal=64%
GO_ADRENAL_GLAND_DEVELOPMENT	GO_ADRENAL_GLAND_DEVELOPMENT		22	-0.411712	-1.23091	0.19619	1	1	6198	tags=59%, list=35%, signal=91%
GO_INO80_TYPE_COMPLEX	GO_INO80_TYPE_COMPLEX		21	-0.422456	-1.23075	0.245399	1	1	2733	tags=52%, list=15%, signal=62%
GO_REGULATION_OF_FIBROBLAST_MIGRATION	GO_REGULATION_OF_FIBROBLAST_MIGRATION		27	-0.374657	-1.22994	0.228457	1	1	3432	tags=41%, list=19%, signal=50%
GO_REGULATION_OF_SYNCYTIUM_FORMATION_BY_PLASMA_MEMBRANE_FUSION	GO_REGULATION_OF_SYNCYTIUM_FORMATION_BY_PLASMA_MEMBRANE_FUSION		18	-0.439934	-1.22963	0.228516	1	1	2942	tags=33%, list=17%, signal=40%
GO_REGULATION_OF_TISSUE_REMODELING	GO_REGULATION_OF_TISSUE_REMODELING		55	-0.355233	-1.22937	0.214425	1	1	5532	tags=44%, list=31%, signal=63%
GO_REGULATION_OF_CARTILAGE_DEVELOPMENT	GO_REGULATION_OF_CARTILAGE_DEVELOPMENT		56	-0.409949	-1.22928	0.286573	1	1	6226	tags=55%, list=35%, signal=85%
GO_REGULATION_OF_RUFFLE_ASSEMBLY	GO_REGULATION_OF_RUFFLE_ASSEMBLY		19	-0.41958	-1.22862	0.202041	1	1	4605	tags=53%, list=26%, signal=71%
GO_MESENCHYMAL_TO_EPITHELIAL_TRANSITION	GO_MESENCHYMAL_TO_EPITHELIAL_TRANSITION		15	-0.465803	-1.2275	0.24165	1	1	7441	tags=73%, list=42%, signal=127%
GO_REGULATION_OF_AXONOGENESIS	GO_REGULATION_OF_AXONOGENESIS		164	-0.319662	-1.22733	0.204589	1	1	5640	tags=45%, list=32%, signal=66%
GO_AORTA_DEVELOPMENT	GO_AORTA_DEVELOPMENT		41	-0.4036	-1.22729	0.235529	1	1	3528	tags=34%, list=20%, signal=43%
GO_POSITIVE_REGULATION_OF_EPIDERMAL_CELL_DIFFERENTIATION	GO_POSITIVE_REGULATION_OF_EPIDERMAL_CELL_DIFFERENTIATION		19	-0.391135	-1.22623	0.203156	1	1	6503	tags=53%, list=37%, signal=83%
GO_REGULATION_OF_TYPE_I_INTERFERON_PRODUCTION	GO_REGULATION_OF_TYPE_I_INTERFERON_PRODUCTION		107	-0.302378	-1.22572	0.205589	1	1	3076	tags=29%, list=17%, signal=35%
GO_GTP_RHO_BINDING	GO_GTP_RHO_BINDING		16	-0.440366	-1.22532	0.229376	1	1	4674	tags=63%, list=26%, signal=85%
GO_NEGATIVE_REGULATION_OF_SMOOTHENED_SIGNALING_PATHWAY	GO_NEGATIVE_REGULATION_OF_SMOOTHENED_SIGNALING_PATHWAY		25	-0.428284	-1.22524	0.232143	1	1	2958	tags=40%, list=17%, signal=48%
GO_POSITIVE_REGULATION_OF_APOPTOTIC_SIGNALING_PATHWAY	GO_POSITIVE_REGULATION_OF_APOPTOTIC_SIGNALING_PATHWAY		164	-0.269759	-1.22522	0.164634	1	1	4122	tags=37%, list=23%, signal=48%
GO_REGULATION_OF_ALPHA_AMINO_3_HYDROXY_5_METHYL_4_ISOXAZOLE_PROPIONATE_SELECTIVE_GLUTAMATE_RECEPTOR_ACTIVITY	GO_REGULATION_OF_ALPHA_AMINO_3_HYDROXY_5_METHYL_4_ISOXAZOLE_PROPIONATE_SELECTIVE_GLUTAMATE_RECEPTOR_ACTIVITY		16	-0.549455	-1.22487	0.282101	1	1	6753	tags=75%, list=38%, signal=121%
GO_I_KAPPAB_KINASE_NF_KAPPAB_SIGNALING	GO_I_KAPPAB_KINASE_NF_KAPPAB_SIGNALING		69	-0.318977	-1.22456	0.231068	1	1	3666	tags=41%, list=21%, signal=51%
GO_REGULATION_OF_ALPHA_BETA_T_CELL_PROLIFERATION	GO_REGULATION_OF_ALPHA_BETA_T_CELL_PROLIFERATION		22	-0.469879	-1.22378	0.276265	1	1	2086	tags=27%, list=12%, signal=31%
GO_ESTABLISHMENT_OF_SPINDLE_ORIENTATION	GO_ESTABLISHMENT_OF_SPINDLE_ORIENTATION		24	-0.390567	-1.22363	0.225549	1	1	1324	tags=25%, list=7%, signal=27%
GO_RESPONSE_TO_SALT_STRESS	GO_RESPONSE_TO_SALT_STRESS		18	-0.406565	-1.22329	0.210101	1	1	4809	tags=50%, list=27%, signal=69%
GO_ACTIN_FILAMENT_BUNDLE	GO_ACTIN_FILAMENT_BUNDLE		50	-0.395724	-1.22264	0.260116	1	1	2284	tags=28%, list=13%, signal=32%
GO_DELAYED_RECTIFIER_POTASSIUM_CHANNEL_ACTIVITY	GO_DELAYED_RECTIFIER_POTASSIUM_CHANNEL_ACTIVITY		33	-0.428587	-1.22255	0.245098	1	1	7608	tags=55%, list=43%, signal=96%
GO_POSITIVE_T_CELL_SELECTION	GO_POSITIVE_T_CELL_SELECTION		20	-0.47897	-1.22143	0.271676	1	1	5220	tags=55%, list=30%, signal=78%
GO_POSITIVE_REGULATION_OF_CYCLIC_NUCLEOTIDE_METABOLIC_PROCESS	GO_POSITIVE_REGULATION_OF_CYCLIC_NUCLEOTIDE_METABOLIC_PROCESS		95	-0.344639	-1.22082	0.22619	1	1	6299	tags=45%, list=36%, signal=70%
GO_EPITHELIAL_CELL_DIFFERENTIATION_INVOLVED_IN_KIDNEY_DEVELOPMENT	GO_EPITHELIAL_CELL_DIFFERENTIATION_INVOLVED_IN_KIDNEY_DEVELOPMENT		24	-0.416885	-1.22068	0.212355	1	1	5367	tags=46%, list=30%, signal=66%
GO_CHONDROITIN_SULFATE_PROTEOGLYCAN_BIOSYNTHETIC_PROCESS	GO_CHONDROITIN_SULFATE_PROTEOGLYCAN_BIOSYNTHETIC_PROCESS		29	-0.444299	-1.22033	0.280808	1	1	2166	tags=28%, list=12%, signal=31%
GO_LIGAND_GATED_CALCIUM_CHANNEL_ACTIVITY	GO_LIGAND_GATED_CALCIUM_CHANNEL_ACTIVITY		16	-0.465637	-1.22015	0.256	1	1	2127	tags=25%, list=12%, signal=28%
GO_POSITIVE_REGULATION_OF_CALCIUM_ION_TRANSMEMBRANE_TRANSPORT	GO_POSITIVE_REGULATION_OF_CALCIUM_ION_TRANSMEMBRANE_TRANSPORT		55	-0.341966	-1.22	0.212982	1	1	2317	tags=22%, list=13%, signal=25%
GO_NEGATIVE_REGULATION_OF_OSTEOBLAST_DIFFERENTIATION	GO_NEGATIVE_REGULATION_OF_OSTEOBLAST_DIFFERENTIATION		36	-0.379491	-1.21944	0.236473	1	1	4189	tags=42%, list=24%, signal=55%
GO_REACTIVE_NITROGEN_SPECIES_METABOLIC_PROCESS	GO_REACTIVE_NITROGEN_SPECIES_METABOLIC_PROCESS		17	-0.412808	-1.21929	0.234568	1	1	2817	tags=35%, list=16%, signal=42%
GO_REGULATION_OF_IMMUNOGLOBULIN_PRODUCTION	GO_REGULATION_OF_IMMUNOGLOBULIN_PRODUCTION		44	-0.360384	-1.21927	0.228516	1	1	4266	tags=41%, list=24%, signal=54%
GO_POSITIVE_REGULATION_OF_CYSTEINE_TYPE_ENDOPEPTIDASE_ACTIVITY_INVOLVED_IN_APOPTOTIC_SIGNALING_PATHWAY	GO_POSITIVE_REGULATION_OF_CYSTEINE_TYPE_ENDOPEPTIDASE_ACTIVITY_INVOLVED_IN_APOPTOTIC_SIGNALING_PATHWAY		17	-0.468482	-1.21884	0.277895	1	1	2451	tags=41%, list=14%, signal=48%
GO_RESPONSE_TO_OXYGEN_RADICAL	GO_RESPONSE_TO_OXYGEN_RADICAL		18	-0.411199	-1.21812	0.230924	1	1	1666	tags=28%, list=9%, signal=31%
GO_NEGATIVE_REGULATION_OF_INTERLEUKIN_6_PRODUCTION	GO_NEGATIVE_REGULATION_OF_INTERLEUKIN_6_PRODUCTION		32	-0.416851	-1.21796	0.266019	1	1	3602	tags=38%, list=20%, signal=47%
GO_CLATHRIN_COAT	GO_CLATHRIN_COAT		45	-0.330307	-1.21778	0.19798	1	1	2071	tags=29%, list=12%, signal=33%
GO_B_CELL_RECEPTOR_SIGNALING_PATHWAY	GO_B_CELL_RECEPTOR_SIGNALING_PATHWAY		35	-0.446501	-1.21679	0.299413	1	1	5246	tags=51%, list=30%, signal=73%
GO_FLUID_TRANSPORT	GO_FLUID_TRANSPORT		25	-0.375142	-1.21584	0.2	1	1	4541	tags=36%, list=26%, signal=48%
GO_NEURON_RECOGNITION	GO_NEURON_RECOGNITION		33	-0.406554	-1.2157	0.236473	1	1	5441	tags=39%, list=31%, signal=57%
GO_RECEPTOR_CLUSTERING	GO_RECEPTOR_CLUSTERING		41	-0.379249	-1.21443	0.25098	1	1	4013	tags=34%, list=23%, signal=44%
GO_EMBRYONIC_DIGESTIVE_TRACT_DEVELOPMENT	GO_EMBRYONIC_DIGESTIVE_TRACT_DEVELOPMENT		32	-0.398454	-1.21147	0.238004	1	1	6466	tags=56%, list=37%, signal=89%
GO_LIPOPROTEIN_PARTICLE_RECEPTOR_ACTIVITY	GO_LIPOPROTEIN_PARTICLE_RECEPTOR_ACTIVITY		16	-0.446485	-1.21138	0.25	1	1	7418	tags=75%, list=42%, signal=129%
GO_POSITIVE_REGULATION_OF_VASODILATION	GO_POSITIVE_REGULATION_OF_VASODILATION		30	-0.387216	-1.2105	0.221569	1	1	4815	tags=43%, list=27%, signal=59%
GO_TRANSCRIPTIONAL_REPRESSOR_ACTIVITY_RNA_POLYMERASE_II_ACTIVATING_TRANSCRIPTION_FACTOR_BINDING	GO_TRANSCRIPTIONAL_REPRESSOR_ACTIVITY_RNA_POLYMERASE_II_ACTIVATING_TRANSCRIPTION_FACTOR_BINDING		51	-0.368615	-1.21048	0.229412	1	1	3309	tags=31%, list=19%, signal=38%
GO_MATURE_B_CELL_DIFFERENTIATION	GO_MATURE_B_CELL_DIFFERENTIATION		17	-0.447622	-1.20981	0.247059	1	1	5623	tags=65%, list=32%, signal=95%
GO_EXECUTION_PHASE_OF_APOPTOSIS	GO_EXECUTION_PHASE_OF_APOPTOSIS		53	-0.308856	-1.20938	0.184426	1	1	1397	tags=23%, list=8%, signal=25%
GO_REGULATION_OF_HYDROGEN_PEROXIDE_INDUCED_CELL_DEATH	GO_REGULATION_OF_HYDROGEN_PEROXIDE_INDUCED_CELL_DEATH		17	-0.391151	-1.209	0.209644	1	1	2741	tags=35%, list=16%, signal=42%
GO_REGULATION_OF_CELL_SIZE	GO_REGULATION_OF_CELL_SIZE		166	-0.297898	-1.20779	0.216981	1	1	4107	tags=33%, list=23%, signal=43%
GO_CELL_SURFACE_RECEPTOR_SIGNALING_PATHWAY_INVOLVED_IN_CELL_CELL_SIGNALING	GO_CELL_SURFACE_RECEPTOR_SIGNALING_PATHWAY_INVOLVED_IN_CELL_CELL_SIGNALING		67	-0.358607	-1.20753	0.229572	1	1	6211	tags=54%, list=35%, signal=83%
GO_POSITIVE_REGULATION_OF_ALPHA_BETA_T_CELL_PROLIFERATION	GO_POSITIVE_REGULATION_OF_ALPHA_BETA_T_CELL_PROLIFERATION		19	-0.493703	-1.20735	0.272545	1	1	2086	tags=26%, list=12%, signal=30%
GO_REGULATION_OF_EXTENT_OF_CELL_GROWTH	GO_REGULATION_OF_EXTENT_OF_CELL_GROWTH		98	-0.328056	-1.20687	0.237192	1	1	5640	tags=49%, list=32%, signal=72%
GO_CARGO_RECEPTOR_ACTIVITY	GO_CARGO_RECEPTOR_ACTIVITY		60	-0.352402	-1.20639	0.246575	1	1	6954	tags=55%, list=39%, signal=90%
GO_NEGATIVE_REGULATION_OF_DEVELOPMENTAL_GROWTH	GO_NEGATIVE_REGULATION_OF_DEVELOPMENTAL_GROWTH		83	-0.309669	-1.20438	0.2147	1	1	5120	tags=40%, list=29%, signal=56%
GO_POSITIVE_REGULATION_OF_EXTRINSIC_APOPTOTIC_SIGNALING_PATHWAY	GO_POSITIVE_REGULATION_OF_EXTRINSIC_APOPTOTIC_SIGNALING_PATHWAY		50	-0.327412	-1.20387	0.23506	1	1	4939	tags=50%, list=28%, signal=69%
GO_POSITIVE_REGULATION_OF_DNA_TEMPLATED_TRANSCRIPTION_ELONGATION	GO_POSITIVE_REGULATION_OF_DNA_TEMPLATED_TRANSCRIPTION_ELONGATION		21	-0.40432	-1.20381	0.268657	1	1	412	tags=24%, list=2%, signal=24%
GO_CHLORIDE_TRANSPORT	GO_CHLORIDE_TRANSPORT		91	-0.315567	-1.20332	0.208251	1	1	3694	tags=27%, list=21%, signal=35%
GO_PEPTIDYL_TYROSINE_AUTOPHOSPHORYLATION	GO_PEPTIDYL_TYROSINE_AUTOPHOSPHORYLATION		39	-0.388242	-1.20321	0.246493	1	1	2728	tags=28%, list=15%, signal=33%
GO_REGULATION_OF_CYSTEINE_TYPE_ENDOPEPTIDASE_ACTIVITY_INVOLVED_IN_APOPTOTIC_SIGNALING_PATHWAY	GO_REGULATION_OF_CYSTEINE_TYPE_ENDOPEPTIDASE_ACTIVITY_INVOLVED_IN_APOPTOTIC_SIGNALING_PATHWAY		22	-0.435721	-1.20319	0.274468	1	1	3794	tags=45%, list=21%, signal=58%
GO_MRNA_TRANSCRIPTION	GO_MRNA_TRANSCRIPTION		20	-0.397895	-1.20313	0.251037	1	1	3702	tags=45%, list=21%, signal=57%
GO_COCHLEA_MORPHOGENESIS	GO_COCHLEA_MORPHOGENESIS		21	-0.417223	-1.2025	0.238372	1	1	7934	tags=71%, list=45%, signal=130%
GO_APOPTOTIC_CELL_CLEARANCE	GO_APOPTOTIC_CELL_CLEARANCE		26	-0.395178	-1.20094	0.258197	1	1	5807	tags=65%, list=33%, signal=97%
GO_ENDOCYTIC_RECYCLING	GO_ENDOCYTIC_RECYCLING		23	-0.396193	-1.20092	0.262425	1	1	3178	tags=52%, list=18%, signal=64%
GO_NEGATIVE_REGULATION_OF_PROTEIN_BINDING	GO_NEGATIVE_REGULATION_OF_PROTEIN_BINDING		77	-0.290447	-1.20042	0.186373	1	1	3245	tags=29%, list=18%, signal=35%
GO_BLOOD_COAGULATION_INTRINSIC_PATHWAY	GO_BLOOD_COAGULATION_INTRINSIC_PATHWAY		16	-0.431082	-1.19978	0.258555	1	1	4574	tags=38%, list=26%, signal=51%
GO_REGULATION_OF_DNA_TEMPLATED_TRANSCRIPTION_ELONGATION	GO_REGULATION_OF_DNA_TEMPLATED_TRANSCRIPTION_ELONGATION		37	-0.350762	-1.19969	0.234714	1	1	2146	tags=27%, list=12%, signal=31%
GO_REGULATION_OF_JUN_KINASE_ACTIVITY	GO_REGULATION_OF_JUN_KINASE_ACTIVITY		78	-0.320651	-1.19925	0.217565	1	1	4697	tags=40%, list=27%, signal=54%
GO_NEGATIVE_CHEMOTAXIS	GO_NEGATIVE_CHEMOTAXIS		39	-0.380718	-1.19913	0.272556	1	1	5640	tags=56%, list=32%, signal=83%
GO_POSITIVE_REGULATION_OF_BLOOD_CIRCULATION	GO_POSITIVE_REGULATION_OF_BLOOD_CIRCULATION		90	-0.336795	-1.19899	0.242604	1	1	6040	tags=41%, list=34%, signal=62%
GO_EXTRACELLULAR_MATRIX_ASSEMBLY	GO_EXTRACELLULAR_MATRIX_ASSEMBLY		16	-0.461868	-1.1987	0.301158	1	1	4452	tags=56%, list=25%, signal=75%
GO_LYTIC_VACUOLE_ORGANIZATION	GO_LYTIC_VACUOLE_ORGANIZATION		50	-0.322404	-1.1984	0.230159	1	1	4076	tags=46%, list=23%, signal=60%
GO_DICARBOXYLIC_ACID_TRANSMEMBRANE_TRANSPORTER_ACTIVITY	GO_DICARBOXYLIC_ACID_TRANSMEMBRANE_TRANSPORTER_ACTIVITY		32	-0.366016	-1.19799	0.208955	1	1	3529	tags=31%, list=20%, signal=39%
GO_DNA_ALKYLATION	GO_DNA_ALKYLATION		38	-0.355115	-1.19551	0.255403	1	1	4793	tags=47%, list=27%, signal=65%
GO_ACTIN_POLYMERIZATION_OR_DEPOLYMERIZATION	GO_ACTIN_POLYMERIZATION_OR_DEPOLYMERIZATION		34	-0.360984	-1.19495	0.237721	1	1	2930	tags=35%, list=17%, signal=42%
GO_POSTSYNAPTIC_MEMBRANE_ORGANIZATION	GO_POSTSYNAPTIC_MEMBRANE_ORGANIZATION		25	-0.418677	-1.19479	0.279468	1	1	7202	tags=68%, list=41%, signal=115%
GO_MULTICELLULAR_ORGANISMAL_WATER_HOMEOSTASIS	GO_MULTICELLULAR_ORGANISMAL_WATER_HOMEOSTASIS		54	-0.357954	-1.19437	0.234714	1	1	6583	tags=59%, list=37%, signal=94%
GO_ENDOLYSOSOME	GO_ENDOLYSOSOME		15	-0.444142	-1.19417	0.254065	1	1	1797	tags=27%, list=10%, signal=30%
GO_DOPAMINE_RECEPTOR_SIGNALING_PATHWAY	GO_DOPAMINE_RECEPTOR_SIGNALING_PATHWAY		27	-0.390493	-1.19368	0.259635	1	1	4392	tags=48%, list=25%, signal=64%
GO_CELL_SUBSTRATE_ADHERENS_JUNCTION_ASSEMBLY	GO_CELL_SUBSTRATE_ADHERENS_JUNCTION_ASSEMBLY		23	-0.400317	-1.19229	0.245059	1	1	5015	tags=48%, list=28%, signal=67%
GO_ENDOTHELIAL_CELL_MIGRATION	GO_ENDOTHELIAL_CELL_MIGRATION		55	-0.346348	-1.19107	0.235178	1	1	4434	tags=42%, list=25%, signal=56%
GO_NEGATIVE_REGULATION_OF_CYTOKINE_PRODUCTION	GO_NEGATIVE_REGULATION_OF_CYTOKINE_PRODUCTION		195	-0.307996	-1.18987	0.247104	1	1	5559	tags=45%, list=31%, signal=65%
GO_POSITIVE_REGULATION_OF_GLUCOSE_METABOLIC_PROCESS	GO_POSITIVE_REGULATION_OF_GLUCOSE_METABOLIC_PROCESS		33	-0.334774	-1.18963	0.217899	1	1	3583	tags=33%, list=20%, signal=42%
GO_NEGATIVE_REGULATION_OF_SMOOTH_MUSCLE_CELL_PROLIFERATION	GO_NEGATIVE_REGULATION_OF_SMOOTH_MUSCLE_CELL_PROLIFERATION		35	-0.37985	-1.18849	0.26499	1	1	6002	tags=51%, list=34%, signal=78%
GO_GLIAL_CELL_DEVELOPMENT	GO_GLIAL_CELL_DEVELOPMENT		73	-0.311485	-1.18743	0.214145	1	1	2984	tags=25%, list=17%, signal=30%
GO_POSITIVE_REGULATION_OF_PHOSPHOLIPID_METABOLIC_PROCESS	GO_POSITIVE_REGULATION_OF_PHOSPHOLIPID_METABOLIC_PROCESS		40	-0.361774	-1.18711	0.252964	1	1	5072	tags=40%, list=29%, signal=56%
GO_PARASYMPATHETIC_NERVOUS_SYSTEM_DEVELOPMENT	GO_PARASYMPATHETIC_NERVOUS_SYSTEM_DEVELOPMENT		15	-0.457039	-1.18693	0.270793	1	1	7412	tags=67%, list=42%, signal=115%
GO_PROTEOGLYCAN_METABOLIC_PROCESS	GO_PROTEOGLYCAN_METABOLIC_PROCESS		80	-0.365282	-1.1861	0.293279	1	1	2217	tags=24%, list=13%, signal=27%
GO_PEPTIDE_HORMONE_RECEPTOR_BINDING	GO_PEPTIDE_HORMONE_RECEPTOR_BINDING		15	-0.436954	-1.18574	0.269841	1	1	5743	tags=60%, list=33%, signal=89%
GO_NEGATIVE_REGULATION_OF_CELL_PROJECTION_ORGANIZATION	GO_NEGATIVE_REGULATION_OF_CELL_PROJECTION_ORGANIZATION		140	-0.300445	-1.18472	0.210216	1	1	5120	tags=41%, list=29%, signal=58%
GO_CALCIUM_ION_IMPORT_INTO_CYTOSOL	GO_CALCIUM_ION_IMPORT_INTO_CYTOSOL		41	-0.386985	-1.18437	0.281437	1	1	5270	tags=39%, list=30%, signal=55%
GO_AROMATIC_AMINO_ACID_FAMILY_CATABOLIC_PROCESS	GO_AROMATIC_AMINO_ACID_FAMILY_CATABOLIC_PROCESS		19	-0.394921	-1.18367	0.232794	1	1	6293	tags=42%, list=36%, signal=65%
GO_POSITIVE_REGULATION_OF_MYOTUBE_DIFFERENTIATION	GO_POSITIVE_REGULATION_OF_MYOTUBE_DIFFERENTIATION		23	-0.411116	-1.18335	0.270492	1	1	4942	tags=43%, list=28%, signal=60%
GO_CLATHRIN_VESICLE_COAT	GO_CLATHRIN_VESICLE_COAT		23	-0.361235	-1.18255	0.248521	1	1	2071	tags=30%, list=12%, signal=34%
GO_REGULATION_OF_OXIDATIVE_STRESS_INDUCED_CELL_DEATH	GO_REGULATION_OF_OXIDATIVE_STRESS_INDUCED_CELL_DEATH		42	-0.316263	-1.1815	0.230769	1	1	3149	tags=31%, list=18%, signal=38%
GO_LYSINE_N_METHYLTRANSFERASE_ACTIVITY	GO_LYSINE_N_METHYLTRANSFERASE_ACTIVITY		37	-0.343735	-1.18142	0.244306	1	1	1243	tags=24%, list=7%, signal=26%
GO_TUMOR_NECROSIS_FACTOR_RECEPTOR_SUPERFAMILY_BINDING	GO_TUMOR_NECROSIS_FACTOR_RECEPTOR_SUPERFAMILY_BINDING		44	-0.36088	-1.18078	0.27112	1	1	4180	tags=43%, list=24%, signal=56%
GO_REGULATION_OF_APOPTOTIC_SIGNALING_PATHWAY	GO_REGULATION_OF_APOPTOTIC_SIGNALING_PATHWAY		344	-0.241469	-1.17985	0.177419	1	1	4122	tags=32%, list=23%, signal=41%
GO_NEGATIVE_REGULATION_OF_RESPONSE_TO_OXIDATIVE_STRESS	GO_NEGATIVE_REGULATION_OF_RESPONSE_TO_OXIDATIVE_STRESS		32	-0.327862	-1.17945	0.226695	1	1	3149	tags=31%, list=18%, signal=38%
GO_SCAVENGER_RECEPTOR_ACTIVITY	GO_SCAVENGER_RECEPTOR_ACTIVITY		39	-0.377639	-1.17872	0.284314	1	1	6111	tags=46%, list=35%, signal=70%
GO_RECEPTOR_AGONIST_ACTIVITY	GO_RECEPTOR_AGONIST_ACTIVITY		15	-0.435217	-1.17614	0.273859	1	1	6301	tags=60%, list=36%, signal=93%
GO_POSITIVE_REGULATION_OF_TRANSMEMBRANE_TRANSPORT	GO_POSITIVE_REGULATION_OF_TRANSMEMBRANE_TRANSPORT		122	-0.288211	-1.1747	0.235644	1	1	4278	tags=30%, list=24%, signal=39%
GO_POSITIVE_REGULATION_OF_CELL_PROJECTION_ORGANIZATION	GO_POSITIVE_REGULATION_OF_CELL_PROJECTION_ORGANIZATION		286	-0.294485	-1.17361	0.250493	1	1	4674	tags=38%, list=26%, signal=51%
GO_NEUROTROPHIN_SIGNALING_PATHWAY	GO_NEUROTROPHIN_SIGNALING_PATHWAY		23	-0.385733	-1.17336	0.272908	1	1	4577	tags=57%, list=26%, signal=76%
GO_POSITIVE_REGULATION_OF_MUSCLE_CONTRACTION	GO_POSITIVE_REGULATION_OF_MUSCLE_CONTRACTION		43	-0.329825	-1.1733	0.259766	1	1	6290	tags=58%, list=36%, signal=90%
GO_PROTEIN_ACTIVATION_CASCADE	GO_PROTEIN_ACTIVATION_CASCADE		62	-0.367049	-1.17313	0.318982	1	1	5619	tags=44%, list=32%, signal=64%
GO_POSITIVE_REGULATION_OF_CHEMOTAXIS	GO_POSITIVE_REGULATION_OF_CHEMOTAXIS		116	-0.347147	-1.17248	0.32613	1	1	5807	tags=44%, list=33%, signal=65%
GO_REGULATION_OF_PROTEIN_ACETYLATION	GO_REGULATION_OF_PROTEIN_ACETYLATION		60	-0.285573	-1.17177	0.226378	1	1	4266	tags=40%, list=24%, signal=53%
GO_NAD_METABOLIC_PROCESS	GO_NAD_METABOLIC_PROCESS		48	-0.375401	-1.17114	0.3147	1	1	6004	tags=60%, list=34%, signal=91%
GO_PROTEIN_TRIMERIZATION	GO_PROTEIN_TRIMERIZATION		38	-0.337751	-1.17083	0.27907	1	1	4053	tags=37%, list=23%, signal=48%
GO_POSITIVE_REGULATION_OF_FILOPODIUM_ASSEMBLY	GO_POSITIVE_REGULATION_OF_FILOPODIUM_ASSEMBLY		23	-0.404707	-1.17075	0.279245	1	1	4440	tags=43%, list=25%, signal=58%
GO_REGULATION_OF_T_CELL_MIGRATION	GO_REGULATION_OF_T_CELL_MIGRATION		24	-0.417544	-1.17064	0.289683	1	1	4584	tags=46%, list=26%, signal=62%
GO_REGULATION_OF_RENAL_SYSTEM_PROCESS	GO_REGULATION_OF_RENAL_SYSTEM_PROCESS		34	-0.37712	-1.17046	0.280075	1	1	5807	tags=38%, list=33%, signal=57%
GO_POSITIVE_REGULATION_OF_MICROTUBULE_POLYMERIZATION	GO_POSITIVE_REGULATION_OF_MICROTUBULE_POLYMERIZATION		18	-0.364139	-1.16955	0.261569	1	1	1370	tags=22%, list=8%, signal=24%
GO_ACTIN_FILAMENT_BUNDLE_ORGANIZATION	GO_ACTIN_FILAMENT_BUNDLE_ORGANIZATION		44	-0.334761	-1.16952	0.255906	1	1	2391	tags=32%, list=14%, signal=37%
GO_ANTIPORTER_ACTIVITY	GO_ANTIPORTER_ACTIVITY		65	-0.31792	-1.16828	0.263889	1	1	5032	tags=37%, list=28%, signal=51%
GO_RESPONSE_TO_VITAMIN	GO_RESPONSE_TO_VITAMIN		94	-0.297011	-1.16776	0.245473	1	1	5945	tags=51%, list=34%, signal=77%
GO_REGULATION_OF_ENDOTHELIAL_CELL_CHEMOTAXIS	GO_REGULATION_OF_ENDOTHELIAL_CELL_CHEMOTAXIS		16	-0.433181	-1.16744	0.291985	1	1	3781	tags=38%, list=21%, signal=48%
GO_ERYTHROCYTE_DEVELOPMENT	GO_ERYTHROCYTE_DEVELOPMENT		22	-0.387064	-1.16734	0.275654	1	1	1565	tags=18%, list=9%, signal=20%
GO_RNA_POLYMERASE_II_TRANSCRIPTION_COACTIVATOR_ACTIVITY	GO_RNA_POLYMERASE_II_TRANSCRIPTION_COACTIVATOR_ACTIVITY		35	-0.392171	-1.1663	0.285714	1	1	3291	tags=29%, list=19%, signal=35%
GO_POSITIVE_REGULATION_OF_CYTOKINE_SECRETION	GO_POSITIVE_REGULATION_OF_CYTOKINE_SECRETION		91	-0.334422	-1.16597	0.296371	1	1	3832	tags=29%, list=22%, signal=36%
GO_REGULATION_OF_CELL_MIGRATION_INVOLVED_IN_SPROUTING_ANGIOGENESIS	GO_REGULATION_OF_CELL_MIGRATION_INVOLVED_IN_SPROUTING_ANGIOGENESIS		18	-0.383837	-1.16577	0.284024	1	1	4269	tags=44%, list=24%, signal=59%
GO_PROTEINACEOUS_EXTRACELLULAR_MATRIX	GO_PROTEINACEOUS_EXTRACELLULAR_MATRIX		337	-0.357332	-1.16576	0.30101	1	1	6436	tags=50%, list=36%, signal=77%
GO_NEGATIVE_REGULATION_OF_SEQUENCE_SPECIFIC_DNA_BINDING_TRANSCRIPTION_FACTOR_ACTIVITY	GO_NEGATIVE_REGULATION_OF_SEQUENCE_SPECIFIC_DNA_BINDING_TRANSCRIPTION_FACTOR_ACTIVITY		128	-0.261744	-1.16574	0.214	1	1	3563	tags=30%, list=20%, signal=37%
GO_REGULATION_OF_CELL_GROWTH	GO_REGULATION_OF_CELL_GROWTH		373	-0.25699	-1.16572	0.210526	1	1	4434	tags=33%, list=25%, signal=43%
GO_MUSCLE_CELL_MIGRATION	GO_MUSCLE_CELL_MIGRATION		18	-0.437461	-1.16539	0.288845	1	1	4722	tags=44%, list=27%, signal=61%
GO_MHC_PROTEIN_BINDING	GO_MHC_PROTEIN_BINDING		26	-0.451751	-1.16459	0.356574	1	1	5593	tags=54%, list=32%, signal=79%
GO_AMEBOIDAL_TYPE_CELL_MIGRATION	GO_AMEBOIDAL_TYPE_CELL_MIGRATION		150	-0.306232	-1.16455	0.260956	1	1	5153	tags=41%, list=29%, signal=58%
GO_ATP_GENERATION_FROM_ADP	GO_ATP_GENERATION_FROM_ADP		34	-0.405279	-1.16419	0.303226	1	1	5943	tags=59%, list=34%, signal=88%
GO_REGULATION_OF_CATECHOLAMINE_SECRETION	GO_REGULATION_OF_CATECHOLAMINE_SECRETION		39	-0.392223	-1.16407	0.291188	1	1	7404	tags=62%, list=42%, signal=106%
GO_NEGATIVE_REGULATION_OF_FAT_CELL_DIFFERENTIATION	GO_NEGATIVE_REGULATION_OF_FAT_CELL_DIFFERENTIATION		40	-0.351083	-1.1635	0.266304	1	1	5647	tags=52%, list=32%, signal=77%
GO_RETROGRADE_TRANSPORT_ENDOSOME_TO_GOLGI	GO_RETROGRADE_TRANSPORT_ENDOSOME_TO_GOLGI		65	-0.277453	-1.1631	0.20155	1	1	2095	tags=29%, list=12%, signal=33%
GO_POSITIVE_REGULATION_OF_GLYCOGEN_METABOLIC_PROCESS	GO_POSITIVE_REGULATION_OF_GLYCOGEN_METABOLIC_PROCESS		16	-0.40053	-1.1629	0.273423	1	1	244	tags=19%, list=1%, signal=19%
GO_REGULATION_OF_MICROTUBULE_POLYMERIZATION	GO_REGULATION_OF_MICROTUBULE_POLYMERIZATION		30	-0.335146	-1.16104	0.255187	1	1	2004	tags=23%, list=11%, signal=26%
GO_ENDOPLASMIC_RETICULUM_CALCIUM_ION_HOMEOSTASIS	GO_ENDOPLASMIC_RETICULUM_CALCIUM_ION_HOMEOSTASIS		20	-0.398585	-1.16085	0.29703	1	1	3712	tags=45%, list=21%, signal=57%
GO_DENDRITIC_SPINE_ORGANIZATION	GO_DENDRITIC_SPINE_ORGANIZATION		17	-0.425867	-1.16068	0.281059	1	1	4525	tags=59%, list=26%, signal=79%
GO_SODIUM_CHANNEL_COMPLEX	GO_SODIUM_CHANNEL_COMPLEX		16	-0.468548	-1.16043	0.341223	1	1	6691	tags=50%, list=38%, signal=80%
GO_POSITIVE_REGULATION_OF_REACTIVE_OXYGEN_SPECIES_METABOLIC_PROCESS	GO_POSITIVE_REGULATION_OF_REACTIVE_OXYGEN_SPECIES_METABOLIC_PROCESS		85	-0.309863	-1.16007	0.247465	1	1	5673	tags=44%, list=32%, signal=64%
GO_HISTONE_H3_ACETYLATION	GO_HISTONE_H3_ACETYLATION		40	-0.312024	-1.15994	0.25	1	1	2453	tags=30%, list=14%, signal=35%
GO_PRERIBOSOME_LARGE_SUBUNIT_PRECURSOR	GO_PRERIBOSOME_LARGE_SUBUNIT_PRECURSOR		20	-0.492484	-1.15981	0.352201	1	1	1682	tags=45%, list=10%, signal=50%
GO_SKELETAL_MUSCLE_CONTRACTION	GO_SKELETAL_MUSCLE_CONTRACTION		31	-0.346333	-1.15981	0.242545	1	1	5113	tags=48%, list=29%, signal=68%
GO_LYSOSOMAL_LUMEN	GO_LYSOSOMAL_LUMEN		85	-0.343613	-1.15842	0.322772	1	1	4739	tags=39%, list=27%, signal=53%
GO_REGULATION_OF_CHONDROCYTE_DIFFERENTIATION	GO_REGULATION_OF_CHONDROCYTE_DIFFERENTIATION		42	-0.402916	-1.15835	0.321212	1	1	6645	tags=57%, list=38%, signal=91%
GO_REGULATION_OF_CARDIAC_MUSCLE_CELL_MEMBRANE_REPOLARIZATION	GO_REGULATION_OF_CARDIAC_MUSCLE_CELL_MEMBRANE_REPOLARIZATION		20	-0.422954	-1.15809	0.299799	1	1	4070	tags=35%, list=23%, signal=45%
GO_NEGATIVE_REGULATION_OF_NUCLEOCYTOPLASMIC_TRANSPORT	GO_NEGATIVE_REGULATION_OF_NUCLEOCYTOPLASMIC_TRANSPORT		69	-0.290242	-1.15783	0.241036	1	1	3148	tags=29%, list=18%, signal=35%
GO_POSITIVE_REGULATION_OF_EPITHELIAL_CELL_MIGRATION	GO_POSITIVE_REGULATION_OF_EPITHELIAL_CELL_MIGRATION		100	-0.323817	-1.15694	0.30572	1	1	5016	tags=41%, list=28%, signal=57%
GO_GLOMERULUS_DEVELOPMENT	GO_GLOMERULUS_DEVELOPMENT		49	-0.381279	-1.1562	0.328215	1	1	5411	tags=41%, list=31%, signal=59%
GO_REGULATION_OF_T_CELL_APOPTOTIC_PROCESS	GO_REGULATION_OF_T_CELL_APOPTOTIC_PROCESS		31	-0.36505	-1.15597	0.283401	1	1	6019	tags=48%, list=34%, signal=73%
GO_INORGANIC_ANION_TRANSPORT	GO_INORGANIC_ANION_TRANSPORT		119	-0.285709	-1.1554	0.232794	1	1	3694	tags=25%, list=21%, signal=32%
GO_MACROMOLECULE_DEACYLATION	GO_MACROMOLECULE_DEACYLATION		66	-0.273838	-1.15484	0.223969	1	1	1845	tags=24%, list=10%, signal=27%
GO_T_HELPER_1_TYPE_IMMUNE_RESPONSE	GO_T_HELPER_1_TYPE_IMMUNE_RESPONSE		18	-0.432671	-1.15449	0.314402	1	1	2287	tags=39%, list=13%, signal=45%
GO_POSITIVE_REGULATION_OF_AXON_EXTENSION	GO_POSITIVE_REGULATION_OF_AXON_EXTENSION		35	-0.386302	-1.15449	0.316973	1	1	4251	tags=43%, list=24%, signal=56%
GO_TRANSCRIPTION_COREPRESSOR_ACTIVITY	GO_TRANSCRIPTION_COREPRESSOR_ACTIVITY		203	-0.259098	-1.15431	0.229508	1	1	2715	tags=25%, list=15%, signal=29%
GO_REGULATION_OF_DEFENSE_RESPONSE_TO_VIRUS_BY_VIRUS	GO_REGULATION_OF_DEFENSE_RESPONSE_TO_VIRUS_BY_VIRUS		29	-0.374856	-1.15382	0.274704	1	1	2107	tags=28%, list=12%, signal=31%
GO_NUCLEOSIDE_TRIPHOSPHATASE_REGULATOR_ACTIVITY	GO_NUCLEOSIDE_TRIPHOSPHATASE_REGULATOR_ACTIVITY		314	-0.257024	-1.1538	0.232514	1	1	3572	tags=30%, list=20%, signal=37%
GO_BHLH_TRANSCRIPTION_FACTOR_BINDING	GO_BHLH_TRANSCRIPTION_FACTOR_BINDING		27	-0.392208	-1.15217	0.313253	1	1	5940	tags=63%, list=34%, signal=95%
GO_DNA_MODIFICATION	GO_DNA_MODIFICATION		71	-0.300804	-1.15213	0.270492	1	1	2386	tags=24%, list=14%, signal=28%
GO_90S_PRERIBOSOME	GO_90S_PRERIBOSOME		23	-0.43709	-1.15027	0.34739	1	1	1736	tags=39%, list=10%, signal=43%
GO_PROTEIN_COMPLEX_SCAFFOLD	GO_PROTEIN_COMPLEX_SCAFFOLD		64	-0.298401	-1.14982	0.262452	1	1	3959	tags=39%, list=22%, signal=50%
GO_POSITIVE_REGULATION_OF_VIRAL_PROCESS	GO_POSITIVE_REGULATION_OF_VIRAL_PROCESS		84	-0.274531	-1.14876	0.258893	1	1	2842	tags=31%, list=16%, signal=37%
GO_CELLULAR_RESPONSE_TO_TOPOLOGICALLY_INCORRECT_PROTEIN	GO_CELLULAR_RESPONSE_TO_TOPOLOGICALLY_INCORRECT_PROTEIN		113	-0.276005	-1.14854	0.280808	1	1	2676	tags=27%, list=15%, signal=32%
GO_REGULATION_OF_INSULIN_SECRETION_INVOLVED_IN_CELLULAR_RESPONSE_TO_GLUCOSE_STIMULUS	GO_REGULATION_OF_INSULIN_SECRETION_INVOLVED_IN_CELLULAR_RESPONSE_TO_GLUCOSE_STIMULUS		48	-0.291139	-1.14839	0.223361	1	1	4249	tags=35%, list=24%, signal=47%
GO_RAB_GTPASE_BINDING	GO_RAB_GTPASE_BINDING		111	-0.290047	-1.14769	0.271318	1	1	2042	tags=26%, list=12%, signal=29%
GO_GABA_RECEPTOR_ACTIVITY	GO_GABA_RECEPTOR_ACTIVITY		17	-0.429219	-1.14729	0.303393	1	1	5527	tags=41%, list=31%, signal=60%
GO_THYMIC_T_CELL_SELECTION	GO_THYMIC_T_CELL_SELECTION		19	-0.450318	-1.14715	0.333333	1	1	3004	tags=42%, list=17%, signal=51%
GO_POSITIVE_REGULATION_OF_LIPID_KINASE_ACTIVITY	GO_POSITIVE_REGULATION_OF_LIPID_KINASE_ACTIVITY		32	-0.3807	-1.14697	0.3	1	1	5072	tags=41%, list=29%, signal=57%
GO_ACTIVATION_OF_MAPK_ACTIVITY	GO_ACTIVATION_OF_MAPK_ACTIVITY		132	-0.278757	-1.14691	0.250996	1	1	3602	tags=30%, list=20%, signal=37%
GO_PURINERGIC_RECEPTOR_SIGNALING_PATHWAY	GO_PURINERGIC_RECEPTOR_SIGNALING_PATHWAY		27	-0.417884	-1.14674	0.334686	1	1	2553	tags=30%, list=14%, signal=35%
GO_RESPONSE_TO_SALT	GO_RESPONSE_TO_SALT		15	-0.401366	-1.14664	0.289157	1	1	5772	tags=53%, list=33%, signal=79%
GO_PROTEOGLYCAN_BIOSYNTHETIC_PROCESS	GO_PROTEOGLYCAN_BIOSYNTHETIC_PROCESS		56	-0.3753	-1.14651	0.3	1	1	2217	tags=23%, list=13%, signal=26%
GO_CELLULAR_COMPONENT_MAINTENANCE	GO_CELLULAR_COMPONENT_MAINTENANCE		18	-0.422996	-1.14624	0.35084	1	1	4819	tags=67%, list=27%, signal=92%
GO_REGULATION_OF_BLOOD_PRESSURE	GO_REGULATION_OF_BLOOD_PRESSURE		157	-0.296773	-1.14614	0.284069	1	1	5949	tags=43%, list=34%, signal=64%
GO_NEUTRAL_LIPID_METABOLIC_PROCESS	GO_NEUTRAL_LIPID_METABOLIC_PROCESS		76	-0.291769	-1.14505	0.240404	1	1	4452	tags=36%, list=25%, signal=47%
GO_O_ACYLTRANSFERASE_ACTIVITY	GO_O_ACYLTRANSFERASE_ACTIVITY		42	-0.306154	-1.14489	0.254545	1	1	3740	tags=38%, list=21%, signal=48%
GO_ACTIN_FILAMENT_BASED_PROCESS	GO_ACTIN_FILAMENT_BASED_PROCESS		422	-0.273018	-1.14468	0.289628	1	1	4545	tags=36%, list=26%, signal=47%
GO_ION_ANTIPORTER_ACTIVITY	GO_ION_ANTIPORTER_ACTIVITY		42	-0.334433	-1.14374	0.292783	1	1	3616	tags=29%, list=20%, signal=36%
GO_REGULATION_OF_CHROMATIN_ORGANIZATION	GO_REGULATION_OF_CHROMATIN_ORGANIZATION		144	-0.259383	-1.14363	0.246	1	1	3558	tags=32%, list=20%, signal=40%
GO_REGULATION_OF_SEQUENCE_SPECIFIC_DNA_BINDING_TRANSCRIPTION_FACTOR_ACTIVITY	GO_REGULATION_OF_SEQUENCE_SPECIFIC_DNA_BINDING_TRANSCRIPTION_FACTOR_ACTIVITY		351	-0.23713	-1.14295	0.222868	1	1	3738	tags=28%, list=21%, signal=34%
GO_PRE_AUTOPHAGOSOMAL_STRUCTURE_MEMBRANE	GO_PRE_AUTOPHAGOSOMAL_STRUCTURE_MEMBRANE		15	-0.4108	-1.14287	0.302281	1	1	384	tags=27%, list=2%, signal=27%
GO_HOMEOSTASIS_OF_NUMBER_OF_CELLS_WITHIN_A_TISSUE	GO_HOMEOSTASIS_OF_NUMBER_OF_CELLS_WITHIN_A_TISSUE		28	-0.345492	-1.1428	0.304183	1	1	2778	tags=36%, list=16%, signal=42%
GO_NEUTRAL_AMINO_ACID_TRANSPORT	GO_NEUTRAL_AMINO_ACID_TRANSPORT		30	-0.354146	-1.14272	0.277567	1	1	4691	tags=50%, list=27%, signal=68%
GO_PROTEIN_DEPOLYMERIZATION	GO_PROTEIN_DEPOLYMERIZATION		23	-0.348846	-1.14188	0.261663	1	1	2355	tags=30%, list=13%, signal=35%
GO_REGULATION_OF_URINE_VOLUME	GO_REGULATION_OF_URINE_VOLUME		19	-0.403615	-1.14188	0.314563	1	1	4784	tags=47%, list=27%, signal=65%
GO_POSITIVE_REGULATION_OF_EXCITATORY_POSTSYNAPTIC_POTENTIAL	GO_POSITIVE_REGULATION_OF_EXCITATORY_POSTSYNAPTIC_POTENTIAL		21	-0.432141	-1.14164	0.327485	1	1	5230	tags=57%, list=30%, signal=81%
GO_SULFUR_COMPOUND_TRANSMEMBRANE_TRANSPORTER_ACTIVITY	GO_SULFUR_COMPOUND_TRANSMEMBRANE_TRANSPORTER_ACTIVITY		26	-0.356736	-1.14046	0.293249	1	1	2898	tags=27%, list=16%, signal=32%
GO_MAMMARY_GLAND_EPITHELIUM_DEVELOPMENT	GO_MAMMARY_GLAND_EPITHELIUM_DEVELOPMENT		53	-0.319561	-1.14022	0.269231	1	1	3649	tags=30%, list=21%, signal=38%
GO_POSITIVE_REGULATION_OF_FATTY_ACID_METABOLIC_PROCESS	GO_POSITIVE_REGULATION_OF_FATTY_ACID_METABOLIC_PROCESS		30	-0.340126	-1.14001	0.256972	1	1	3642	tags=40%, list=21%, signal=50%
GO_DNA_DIRECTED_RNA_POLYMERASE_II_CORE_COMPLEX	GO_DNA_DIRECTED_RNA_POLYMERASE_II_CORE_COMPLEX		16	-0.41733	-1.1399	0.33871	1	1	2766	tags=38%, list=16%, signal=44%
GO_ENDONUCLEASE_ACTIVITY_ACTIVE_WITH_EITHER_RIBO_OR_DEOXYRIBONUCLEIC_ACIDS_AND_PRODUCING_3_PHOSPHOMONOESTERS	GO_ENDONUCLEASE_ACTIVITY_ACTIVE_WITH_EITHER_RIBO_OR_DEOXYRIBONUCLEIC_ACIDS_AND_PRODUCING_3_PHOSPHOMONOESTERS		17	-0.387568	-1.13879	0.302772	1	1	4102	tags=47%, list=23%, signal=61%
GO_RESPONSE_TO_EPIDERMAL_GROWTH_FACTOR	GO_RESPONSE_TO_EPIDERMAL_GROWTH_FACTOR		28	-0.349845	-1.13877	0.296078	1	1	4084	tags=39%, list=23%, signal=51%
GO_REGULATION_OF_STEROL_TRANSPORT	GO_REGULATION_OF_STEROL_TRANSPORT		37	-0.333506	-1.13779	0.266533	1	1	4133	tags=35%, list=23%, signal=46%
GO_POSITIVE_REGULATION_OF_CARTILAGE_DEVELOPMENT	GO_POSITIVE_REGULATION_OF_CARTILAGE_DEVELOPMENT		26	-0.398284	-1.13738	0.333988	1	1	5940	tags=50%, list=34%, signal=75%
GO_POSITIVE_REGULATION_OF_MAP_KINASE_ACTIVITY	GO_POSITIVE_REGULATION_OF_MAP_KINASE_ACTIVITY		199	-0.276587	-1.13735	0.279441	1	1	4739	tags=35%, list=27%, signal=48%
GO_MHC_CLASS_I_PROTEIN_BINDING	GO_MHC_CLASS_I_PROTEIN_BINDING		19	-0.442936	-1.13712	0.34879	1	1	5593	tags=53%, list=32%, signal=77%
GO_REGULATION_OF_MITOCHONDRION_ORGANIZATION	GO_REGULATION_OF_MITOCHONDRION_ORGANIZATION		196	-0.259763	-1.13703	0.269068	1	1	3244	tags=30%, list=18%, signal=36%
GO_MAMMARY_GLAND_MORPHOGENESIS	GO_MAMMARY_GLAND_MORPHOGENESIS		39	-0.356635	-1.13681	0.305927	1	1	6198	tags=49%, list=35%, signal=75%
GO_DNA_DIRECTED_RNA_POLYMERASE_III_COMPLEX	GO_DNA_DIRECTED_RNA_POLYMERASE_III_COMPLEX		18	-0.415292	-1.13681	0.31875	1	1	2091	tags=28%, list=12%, signal=31%
GO_PURINERGIC_NUCLEOTIDE_RECEPTOR_SIGNALING_PATHWAY	GO_PURINERGIC_NUCLEOTIDE_RECEPTOR_SIGNALING_PATHWAY		22	-0.425722	-1.1367	0.334686	1	1	2553	tags=32%, list=14%, signal=37%
GO_POSITIVE_REGULATION_OF_INSULIN_SECRETION_INVOLVED_IN_CELLULAR_RESPONSE_TO_GLUCOSE_STIMULUS	GO_POSITIVE_REGULATION_OF_INSULIN_SECRETION_INVOLVED_IN_CELLULAR_RESPONSE_TO_GLUCOSE_STIMULUS		24	-0.334103	-1.13495	0.26569	1	1	4249	tags=42%, list=24%, signal=55%
GO_CELL_AGGREGATION	GO_CELL_AGGREGATION		18	-0.412977	-1.13463	0.303922	1	1	7142	tags=72%, list=40%, signal=121%
GO_POSITIVE_REGULATION_OF_ACTIN_FILAMENT_BUNDLE_ASSEMBLY	GO_POSITIVE_REGULATION_OF_ACTIN_FILAMENT_BUNDLE_ASSEMBLY		45	-0.319128	-1.1344	0.270059	1	1	5564	tags=40%, list=32%, signal=58%
GO_NON_MEMBRANE_SPANNING_PROTEIN_TYROSINE_KINASE_ACTIVITY	GO_NON_MEMBRANE_SPANNING_PROTEIN_TYROSINE_KINASE_ACTIVITY		45	-0.332001	-1.13415	0.300971	1	1	1705	tags=22%, list=10%, signal=25%
GO_NEGATIVE_REGULATION_OF_HISTONE_METHYLATION	GO_NEGATIVE_REGULATION_OF_HISTONE_METHYLATION		16	-0.422095	-1.13352	0.313646	1	1	4232	tags=44%, list=24%, signal=57%
GO_REGULATION_OF_ESTABLISHMENT_OF_PROTEIN_LOCALIZATION_TO_MITOCHONDRION	GO_REGULATION_OF_ESTABLISHMENT_OF_PROTEIN_LOCALIZATION_TO_MITOCHONDRION		119	-0.263799	-1.13347	0.246988	1	1	3229	tags=29%, list=18%, signal=35%
GO_REGULATION_OF_EXTRINSIC_APOPTOTIC_SIGNALING_PATHWAY	GO_REGULATION_OF_EXTRINSIC_APOPTOTIC_SIGNALING_PATHWAY		147	-0.266423	-1.13217	0.24498	1	1	3955	tags=30%, list=22%, signal=38%
GO_REGULATION_OF_INTERLEUKIN_2_PRODUCTION	GO_REGULATION_OF_INTERLEUKIN_2_PRODUCTION		47	-0.377627	-1.13216	0.359127	1	1	3004	tags=30%, list=17%, signal=36%
GO_REGULATION_OF_TOR_SIGNALING	GO_REGULATION_OF_TOR_SIGNALING		64	-0.28107	-1.13158	0.258383	1	1	1254	tags=22%, list=7%, signal=23%
GO_POSITIVE_REGULATION_OF_SYNAPSE_ASSEMBLY	GO_POSITIVE_REGULATION_OF_SYNAPSE_ASSEMBLY		53	-0.36785	-1.13047	0.329341	1	1	6759	tags=49%, list=38%, signal=79%
GO_POSITIVE_REGULATION_OF_SEQUENCE_SPECIFIC_DNA_BINDING_TRANSCRIPTION_FACTOR_ACTIVITY	GO_POSITIVE_REGULATION_OF_SEQUENCE_SPECIFIC_DNA_BINDING_TRANSCRIPTION_FACTOR_ACTIVITY		222	-0.24878	-1.13034	0.252918	1	1	4410	tags=32%, list=25%, signal=41%
GO_NEGATIVE_REGULATION_OF_OXIDOREDUCTASE_ACTIVITY	GO_NEGATIVE_REGULATION_OF_OXIDOREDUCTASE_ACTIVITY		24	-0.347552	-1.13008	0.305955	1	1	2083	tags=17%, list=12%, signal=19%
GO_MULTICELLULAR_ORGANISMAL_MACROMOLECULE_METABOLIC_PROCESS	GO_MULTICELLULAR_ORGANISMAL_MACROMOLECULE_METABOLIC_PROCESS		71	-0.40426	-1.12937	0.356394	1	1	4452	tags=39%, list=25%, signal=53%
GO_REGULATION_OF_NATURAL_KILLER_CELL_MEDIATED_IMMUNITY	GO_REGULATION_OF_NATURAL_KILLER_CELL_MEDIATED_IMMUNITY		33	-0.408825	-1.12916	0.358382	1	1	6900	tags=55%, list=39%, signal=89%
GO_REGULATION_OF_IMMUNOGLOBULIN_SECRETION	GO_REGULATION_OF_IMMUNOGLOBULIN_SECRETION		16	-0.420077	-1.12887	0.32233	1	1	3916	tags=44%, list=22%, signal=56%
GO_SULFUR_COMPOUND_TRANSPORT	GO_SULFUR_COMPOUND_TRANSPORT		31	-0.342241	-1.12876	0.286307	1	1	3290	tags=32%, list=19%, signal=40%
GO_RESPONSE_TO_NERVE_GROWTH_FACTOR	GO_RESPONSE_TO_NERVE_GROWTH_FACTOR		37	-0.333721	-1.12863	0.274549	1	1	2790	tags=30%, list=16%, signal=35%
GO_TRANSCRIPTIONAL_ACTIVATOR_ACTIVITY_RNA_POLYMERASE_II_DISTAL_ENHANCER_SEQUENCE_SPECIFIC_BINDING	GO_TRANSCRIPTIONAL_ACTIVATOR_ACTIVITY_RNA_POLYMERASE_II_DISTAL_ENHANCER_SEQUENCE_SPECIFIC_BINDING		23	-0.356497	-1.12833	0.311741	1	1	4351	tags=43%, list=25%, signal=58%
GO_POSITIVE_REGULATION_OF_LIPID_METABOLIC_PROCESS	GO_POSITIVE_REGULATION_OF_LIPID_METABOLIC_PROCESS		120	-0.277045	-1.12825	0.275591	1	1	5131	tags=39%, list=29%, signal=55%
GO_PLASMA_LIPOPROTEIN_PARTICLE_CLEARANCE	GO_PLASMA_LIPOPROTEIN_PARTICLE_CLEARANCE		21	-0.399509	-1.1278	0.312871	1	1	5673	tags=48%, list=32%, signal=70%
GO_REGULATION_OF_VASCULAR_ENDOTHELIAL_GROWTH_FACTOR_RECEPTOR_SIGNALING_PATHWAY	GO_REGULATION_OF_VASCULAR_ENDOTHELIAL_GROWTH_FACTOR_RECEPTOR_SIGNALING_PATHWAY		26	-0.391899	-1.12766	0.343284	1	1	1453	tags=19%, list=8%, signal=21%
GO_NEGATIVE_REGULATION_OF_PLATELET_ACTIVATION	GO_NEGATIVE_REGULATION_OF_PLATELET_ACTIVATION		17	-0.440988	-1.12743	0.329567	1	1	5915	tags=59%, list=33%, signal=88%
GO_SPINAL_CORD_PATTERNING	GO_SPINAL_CORD_PATTERNING		24	-0.414344	-1.12727	0.327902	1	1	2958	tags=29%, list=17%, signal=35%
GO_REGULATION_OF_NOTCH_SIGNALING_PATHWAY	GO_REGULATION_OF_NOTCH_SIGNALING_PATHWAY		63	-0.303713	-1.12724	0.284848	1	1	3418	tags=29%, list=19%, signal=35%
GO_TRANSCRIPTION_FROM_RNA_POLYMERASE_III_PROMOTER	GO_TRANSCRIPTION_FROM_RNA_POLYMERASE_III_PROMOTER		38	-0.333978	-1.12644	0.306911	1	1	2091	tags=26%, list=12%, signal=30%
GO_FLAVIN_ADENINE_DINUCLEOTIDE_BINDING	GO_FLAVIN_ADENINE_DINUCLEOTIDE_BINDING		73	-0.294422	-1.12623	0.298354	1	1	3141	tags=32%, list=18%, signal=38%
GO_REGULATION_OF_MACROPHAGE_CHEMOTAXIS	GO_REGULATION_OF_MACROPHAGE_CHEMOTAXIS		16	-0.469748	-1.12447	0.356299	1	1	5442	tags=56%, list=31%, signal=81%
GO_REGULATION_OF_LIPID_CATABOLIC_PROCESS	GO_REGULATION_OF_LIPID_CATABOLIC_PROCESS		50	-0.310752	-1.12429	0.299413	1	1	5072	tags=40%, list=29%, signal=56%
GO_POSITIVE_REGULATION_OF_HEART_CONTRACTION	GO_POSITIVE_REGULATION_OF_HEART_CONTRACTION		35	-0.326324	-1.12424	0.282828	1	1	5645	tags=40%, list=32%, signal=59%
GO_ATPASE_COMPLEX	GO_ATPASE_COMPLEX		23	-0.374786	-1.12408	0.315175	1	1	3694	tags=30%, list=21%, signal=38%
GO_SMOOTH_MUSCLE_CELL_DIFFERENTIATION	GO_SMOOTH_MUSCLE_CELL_DIFFERENTIATION		30	-0.372392	-1.12359	0.326336	1	1	1699	tags=20%, list=10%, signal=22%
GO_WATER_HOMEOSTASIS	GO_WATER_HOMEOSTASIS		65	-0.322671	-1.12349	0.290323	1	1	6583	tags=54%, list=37%, signal=86%
GO_NEGATIVE_REGULATION_OF_ORGANELLE_ASSEMBLY	GO_NEGATIVE_REGULATION_OF_ORGANELLE_ASSEMBLY		22	-0.327926	-1.12348	0.292683	1	1	4425	tags=45%, list=25%, signal=61%
GO_RESPONSE_TO_FATTY_ACID	GO_RESPONSE_TO_FATTY_ACID		81	-0.279725	-1.12342	0.27907	1	1	5389	tags=43%, list=31%, signal=62%
GO_REGULATION_OF_NEURON_PROJECTION_DEVELOPMENT	GO_REGULATION_OF_NEURON_PROJECTION_DEVELOPMENT		391	-0.281902	-1.12315	0.300395	1	1	5602	tags=43%, list=32%, signal=61%
GO_MEMBRANE_DEPOLARIZATION	GO_MEMBRANE_DEPOLARIZATION		57	-0.351107	-1.12311	0.306084	1	1	7520	tags=49%, list=43%, signal=85%
GO_S_ACYLTRANSFERASE_ACTIVITY	GO_S_ACYLTRANSFERASE_ACTIVITY		29	-0.332546	-1.123	0.302913	1	1	1820	tags=28%, list=10%, signal=31%
GO_CELLULAR_RESPONSE_TO_GLUCAGON_STIMULUS	GO_CELLULAR_RESPONSE_TO_GLUCAGON_STIMULUS		37	-0.339257	-1.12266	0.30695	1	1	5558	tags=46%, list=31%, signal=67%
GO_MLL1_2_COMPLEX	GO_MLL1_2_COMPLEX		26	-0.358523	-1.12257	0.311609	1	1	1669	tags=35%, list=9%, signal=38%
GO_MICROFILAMENT_MOTOR_ACTIVITY	GO_MICROFILAMENT_MOTOR_ACTIVITY		21	-0.414555	-1.12226	0.332661	1	1	2027	tags=24%, list=11%, signal=27%
GO_CELL_SUBSTRATE_ADHESION	GO_CELL_SUBSTRATE_ADHESION		160	-0.311819	-1.12213	0.336653	1	1	4583	tags=37%, list=26%, signal=49%
GO_PHAGOCYTOSIS_ENGULFMENT	GO_PHAGOCYTOSIS_ENGULFMENT		19	-0.432051	-1.12205	0.378968	1	1	3527	tags=32%, list=20%, signal=39%
GO_POSITIVE_REGULATION_OF_NUCLEOTIDE_METABOLIC_PROCESS	GO_POSITIVE_REGULATION_OF_NUCLEOTIDE_METABOLIC_PROCESS		116	-0.303621	-1.12174	0.299803	1	1	6299	tags=43%, list=36%, signal=67%
GO_REGULATION_OF_NEUTROPHIL_CHEMOTAXIS	GO_REGULATION_OF_NEUTROPHIL_CHEMOTAXIS		25	-0.393578	-1.1217	0.34902	1	1	7459	tags=72%, list=42%, signal=124%
GO_CHONDROITIN_SULFATE_BIOSYNTHETIC_PROCESS	GO_CHONDROITIN_SULFATE_BIOSYNTHETIC_PROCESS		25	-0.428482	-1.12124	0.379668	1	1	2166	tags=28%, list=12%, signal=32%
GO_POSITIVE_REGULATION_OF_PRODUCTION_OF_MOLECULAR_MEDIATOR_OF_IMMUNE_RESPONSE	GO_POSITIVE_REGULATION_OF_PRODUCTION_OF_MOLECULAR_MEDIATOR_OF_IMMUNE_RESPONSE		59	-0.334853	-1.12094	0.343874	1	1	4266	tags=36%, list=24%, signal=47%
GO_NEGATIVE_REGULATION_OF_CARTILAGE_DEVELOPMENT	GO_NEGATIVE_REGULATION_OF_CARTILAGE_DEVELOPMENT		23	-0.430963	-1.12093	0.353635	1	1	6226	tags=61%, list=35%, signal=94%
GO_NEGATIVE_REGULATION_OF_NUCLEOTIDE_METABOLIC_PROCESS	GO_NEGATIVE_REGULATION_OF_NUCLEOTIDE_METABOLIC_PROCESS		57	-0.316095	-1.12082	0.303089	1	1	4577	tags=35%, list=26%, signal=47%
GO_REGULATION_OF_MONONUCLEAR_CELL_MIGRATION	GO_REGULATION_OF_MONONUCLEAR_CELL_MIGRATION		15	-0.489749	-1.1205	0.374257	1	1	5598	tags=60%, list=32%, signal=88%
GO_MODULATION_OF_EXCITATORY_POSTSYNAPTIC_POTENTIAL	GO_MODULATION_OF_EXCITATORY_POSTSYNAPTIC_POTENTIAL		30	-0.393138	-1.12035	0.352251	1	1	5230	tags=57%, list=30%, signal=80%
GO_PHOSPHATIDYLINOSITOL_3_PHOSPHATE_BINDING	GO_PHOSPHATIDYLINOSITOL_3_PHOSPHATE_BINDING		29	-0.333626	-1.11861	0.299256	1	1	4905	tags=48%, list=28%, signal=67%
GO_INNER_EAR_RECEPTOR_STEREOCILIUM_ORGANIZATION	GO_INNER_EAR_RECEPTOR_STEREOCILIUM_ORGANIZATION		19	-0.385496	-1.11832	0.323887	1	1	3432	tags=32%, list=19%, signal=39%
GO_POSITIVE_REGULATION_OF_TYPE_I_INTERFERON_PRODUCTION	GO_POSITIVE_REGULATION_OF_TYPE_I_INTERFERON_PRODUCTION		69	-0.27757	-1.1172	0.286	1	1	2573	tags=25%, list=15%, signal=29%
GO_REGULATION_OF_NON_CANONICAL_WNT_SIGNALING_PATHWAY	GO_REGULATION_OF_NON_CANONICAL_WNT_SIGNALING_PATHWAY		19	-0.381808	-1.11694	0.321012	1	1	398	tags=16%, list=2%, signal=16%
GO_REGULATION_OF_ARF_PROTEIN_SIGNAL_TRANSDUCTION	GO_REGULATION_OF_ARF_PROTEIN_SIGNAL_TRANSDUCTION		15	-0.414933	-1.11608	0.323471	1	1	4371	tags=60%, list=25%, signal=80%
GO_LONG_TERM_MEMORY	GO_LONG_TERM_MEMORY		28	-0.359441	-1.11548	0.318359	1	1	5569	tags=46%, list=32%, signal=68%
GO_POSITIVE_REGULATION_OF_CYTOPLASMIC_TRANSPORT	GO_POSITIVE_REGULATION_OF_CYTOPLASMIC_TRANSPORT		267	-0.231888	-1.11539	0.247967	1	1	3936	tags=29%, list=22%, signal=37%
GO_MONOSACCHARIDE_CATABOLIC_PROCESS	GO_MONOSACCHARIDE_CATABOLIC_PROCESS		53	-0.350944	-1.11484	0.366053	1	1	5943	tags=57%, list=34%, signal=85%
GO_WATER_TRANSPORT	GO_WATER_TRANSPORT		18	-0.377729	-1.11449	0.312016	1	1	4156	tags=33%, list=24%, signal=44%
GO_POSITIVE_REGULATION_OF_NEURON_PROJECTION_DEVELOPMENT	GO_POSITIVE_REGULATION_OF_NEURON_PROJECTION_DEVELOPMENT		225	-0.291439	-1.11391	0.315686	1	1	5640	tags=45%, list=32%, signal=65%
GO_MACROLIDE_BINDING	GO_MACROLIDE_BINDING		17	-0.38588	-1.11333	0.332645	1	1	3835	tags=35%, list=22%, signal=45%
GO_NEGATIVE_REGULATION_OF_CYTOKINE_BIOSYNTHETIC_PROCESS	GO_NEGATIVE_REGULATION_OF_CYTOKINE_BIOSYNTHETIC_PROCESS		27	-0.360907	-1.11303	0.335984	1	1	5559	tags=48%, list=31%, signal=70%
GO_REGULATION_OF_PROTEIN_DEACETYLATION	GO_REGULATION_OF_PROTEIN_DEACETYLATION		32	-0.334503	-1.11227	0.310621	1	1	3693	tags=44%, list=21%, signal=55%
GO_DIOXYGENASE_ACTIVITY	GO_DIOXYGENASE_ACTIVITY		78	-0.270122	-1.11225	0.283613	1	1	3546	tags=29%, list=20%, signal=37%
GO_HYDROLASE_ACTIVITY_ACTING_ON_CARBON_NITROGEN_BUT_NOT_PEPTIDE_BONDS_IN_LINEAR_AMIDES	GO_HYDROLASE_ACTIVITY_ACTING_ON_CARBON_NITROGEN_BUT_NOT_PEPTIDE_BONDS_IN_LINEAR_AMIDES		84	-0.262413	-1.11152	0.267857	1	1	2139	tags=21%, list=12%, signal=24%
GO_REGULATION_OF_ENDOTHELIAL_CELL_DIFFERENTIATION	GO_REGULATION_OF_ENDOTHELIAL_CELL_DIFFERENTIATION		26	-0.36763	-1.11065	0.342742	1	1	4741	tags=50%, list=27%, signal=68%
GO_REGULATION_OF_PHOSPHATIDYLINOSITOL_3_KINASE_ACTIVITY	GO_REGULATION_OF_PHOSPHATIDYLINOSITOL_3_KINASE_ACTIVITY		39	-0.353624	-1.11017	0.339181	1	1	5711	tags=46%, list=32%, signal=68%
GO_NEGATIVE_REGULATION_OF_COAGULATION	GO_NEGATIVE_REGULATION_OF_COAGULATION		48	-0.338835	-1.11008	0.338583	1	1	6627	tags=50%, list=38%, signal=80%
GO_MODULATION_BY_HOST_OF_VIRAL_PROCESS	GO_MODULATION_BY_HOST_OF_VIRAL_PROCESS		16	-0.357588	-1.10988	0.289206	1	1	4013	tags=38%, list=23%, signal=48%
GO_BONE_REMODELING	GO_BONE_REMODELING		33	-0.350118	-1.10895	0.327968	1	1	4784	tags=42%, list=27%, signal=58%
GO_POSITIVE_REGULATION_OF_MITOCHONDRION_ORGANIZATION	GO_POSITIVE_REGULATION_OF_MITOCHONDRION_ORGANIZATION		150	-0.254927	-1.10886	0.28903	1	1	3244	tags=29%, list=18%, signal=35%
GO_LONG_CHAIN_FATTY_ACID_TRANSPORT	GO_LONG_CHAIN_FATTY_ACID_TRANSPORT		40	-0.304486	-1.10873	0.307544	1	1	4049	tags=40%, list=23%, signal=52%
GO_T_CELL_SELECTION	GO_T_CELL_SELECTION		35	-0.399869	-1.10869	0.400771	1	1	5613	tags=57%, list=32%, signal=84%
GO_ACTIN_FILAMENT_BINDING	GO_ACTIN_FILAMENT_BINDING		115	-0.287976	-1.10853	0.332008	1	1	3702	tags=30%, list=21%, signal=37%
GO_RESPONSE_TO_LEAD_ION	GO_RESPONSE_TO_LEAD_ION		19	-0.367817	-1.10781	0.336735	1	1	5727	tags=53%, list=32%, signal=78%
GO_MOTOR_NEURON_AXON_GUIDANCE	GO_MOTOR_NEURON_AXON_GUIDANCE		27	-0.374591	-1.10776	0.337786	1	1	5930	tags=44%, list=34%, signal=67%
GO_MORPHOGENESIS_OF_AN_ENDOTHELIUM	GO_MORPHOGENESIS_OF_AN_ENDOTHELIUM		16	-0.400994	-1.10628	0.344423	1	1	3421	tags=44%, list=19%, signal=54%
GO_TERMINAL_BOUTON	GO_TERMINAL_BOUTON		63	-0.316045	-1.10567	0.34127	1	1	5971	tags=46%, list=34%, signal=69%
GO_REGULATION_OF_INSULIN_RECEPTOR_SIGNALING_PATHWAY	GO_REGULATION_OF_INSULIN_RECEPTOR_SIGNALING_PATHWAY		40	-0.30049	-1.10525	0.316832	1	1	2179	tags=25%, list=12%, signal=28%
GO_POSITIVE_REGULATION_OF_CATION_TRANSMEMBRANE_TRANSPORT	GO_POSITIVE_REGULATION_OF_CATION_TRANSMEMBRANE_TRANSPORT		91	-0.281348	-1.10516	0.317172	1	1	4278	tags=31%, list=24%, signal=40%
GO_REGULATION_OF_BINDING	GO_REGULATION_OF_BINDING		278	-0.230143	-1.10482	0.29845	1	1	2469	tags=20%, list=14%, signal=23%
GO_MONOSACCHARIDE_BIOSYNTHETIC_PROCESS	GO_MONOSACCHARIDE_BIOSYNTHETIC_PROCESS		52	-0.34321	-1.10447	0.361746	1	1	6004	tags=60%, list=34%, signal=90%
GO_REGULATION_OF_PROTEIN_LOCALIZATION_TO_NUCLEUS	GO_REGULATION_OF_PROTEIN_LOCALIZATION_TO_NUCLEUS		212	-0.237726	-1.10423	0.276859	1	1	3909	tags=30%, list=22%, signal=38%
GO_COLLAGEN_TRIMER	GO_COLLAGEN_TRIMER		82	-0.387844	-1.10414	0.389662	1	1	6508	tags=52%, list=37%, signal=83%
GO_NEGATIVE_REGULATION_OF_CARDIAC_MUSCLE_TISSUE_DEVELOPMENT	GO_NEGATIVE_REGULATION_OF_CARDIAC_MUSCLE_TISSUE_DEVELOPMENT		17	-0.395331	-1.10394	0.352227	1	1	6315	tags=47%, list=36%, signal=73%
GO_BONE_RESORPTION	GO_BONE_RESORPTION		20	-0.370585	-1.10274	0.31384	1	1	3218	tags=35%, list=18%, signal=43%
GO_REGULATION_OF_PROTEIN_LOCALIZATION_TO_CELL_SURFACE	GO_REGULATION_OF_PROTEIN_LOCALIZATION_TO_CELL_SURFACE		27	-0.312816	-1.1027	0.323045	1	1	2095	tags=22%, list=12%, signal=25%
GO_REGULATION_OF_RESPONSE_TO_OXIDATIVE_STRESS	GO_REGULATION_OF_RESPONSE_TO_OXIDATIVE_STRESS		59	-0.267625	-1.10244	0.289583	1	1	3602	tags=31%, list=20%, signal=38%
GO_RHO_GTPASE_BINDING	GO_RHO_GTPASE_BINDING		76	-0.289637	-1.10221	0.324649	1	1	4760	tags=45%, list=27%, signal=61%
GO_REGULATION_OF_RAS_PROTEIN_SIGNAL_TRANSDUCTION	GO_REGULATION_OF_RAS_PROTEIN_SIGNAL_TRANSDUCTION		179	-0.292061	-1.10194	0.342308	1	1	4069	tags=36%, list=23%, signal=46%
GO_POSITIVE_REGULATION_OF_I_KAPPAB_KINASE_NF_KAPPAB_SIGNALING	GO_POSITIVE_REGULATION_OF_I_KAPPAB_KINASE_NF_KAPPAB_SIGNALING		176	-0.260227	-1.10186	0.305556	1	1	3794	tags=32%, list=21%, signal=40%
GO_REGULATION_OF_FATTY_ACID_TRANSPORT	GO_REGULATION_OF_FATTY_ACID_TRANSPORT		26	-0.333393	-1.10177	0.324752	1	1	2553	tags=27%, list=14%, signal=31%
GO_EXTRACELLULAR_STRUCTURE_ORGANIZATION	GO_EXTRACELLULAR_STRUCTURE_ORGANIZATION		294	-0.338086	-1.10175	0.365702	1	1	5997	tags=48%, list=34%, signal=71%
GO_HORMONE_ACTIVITY	GO_HORMONE_ACTIVITY		86	-0.299992	-1.1015	0.319361	1	1	8291	tags=69%, list=47%, signal=129%
GO_REGULATION_OF_RELEASE_OF_CYTOCHROME_C_FROM_MITOCHONDRIA	GO_REGULATION_OF_RELEASE_OF_CYTOCHROME_C_FROM_MITOCHONDRIA		41	-0.313168	-1.10147	0.339545	1	1	3952	tags=37%, list=22%, signal=47%
GO_PLATELET_DEGRANULATION	GO_PLATELET_DEGRANULATION		102	-0.31649	-1.10005	0.35743	1	1	6627	tags=49%, list=38%, signal=78%
GO_REGULATION_OF_MACROPHAGE_ACTIVATION	GO_REGULATION_OF_MACROPHAGE_ACTIVATION		24	-0.356148	-1.09984	0.333333	1	1	6311	tags=50%, list=36%, signal=78%
GO_L_AMINO_ACID_TRANSMEMBRANE_TRANSPORTER_ACTIVITY	GO_L_AMINO_ACID_TRANSMEMBRANE_TRANSPORTER_ACTIVITY		49	-0.31592	-1.09967	0.330116	1	1	5245	tags=43%, list=30%, signal=61%
GO_ACTIVATION_OF_PROTEIN_KINASE_ACTIVITY	GO_ACTIVATION_OF_PROTEIN_KINASE_ACTIVITY		270	-0.249941	-1.09863	0.328	1	1	3602	tags=29%, list=20%, signal=35%
GO_NEGATIVE_REGULATION_OF_DNA_BIOSYNTHETIC_PROCESS	GO_NEGATIVE_REGULATION_OF_DNA_BIOSYNTHETIC_PROCESS		30	-0.305737	-1.09819	0.321792	1	1	3414	tags=33%, list=19%, signal=41%
GO_REGULATION_OF_CELL_MORPHOGENESIS_INVOLVED_IN_DIFFERENTIATION	GO_REGULATION_OF_CELL_MORPHOGENESIS_INVOLVED_IN_DIFFERENTIATION		323	-0.267254	-1.09773	0.305556	1	1	5493	tags=40%, list=31%, signal=57%
GO_NITROGEN_CYCLE_METABOLIC_PROCESS	GO_NITROGEN_CYCLE_METABOLIC_PROCESS		15	-0.391881	-1.09741	0.337864	1	1	3049	tags=33%, list=17%, signal=40%
GO_POSITIVE_REGULATION_OF_INTRACELLULAR_TRANSPORT	GO_POSITIVE_REGULATION_OF_INTRACELLULAR_TRANSPORT		342	-0.224973	-1.09688	0.273101	1	1	3952	tags=29%, list=22%, signal=37%
GO_REGULATION_OF_POLYSACCHARIDE_METABOLIC_PROCESS	GO_REGULATION_OF_POLYSACCHARIDE_METABOLIC_PROCESS		41	-0.294381	-1.09686	0.314672	1	1	5293	tags=44%, list=30%, signal=63%
GO_NEGATIVE_REGULATION_OF_CYSTEINE_TYPE_ENDOPEPTIDASE_ACTIVITY	GO_NEGATIVE_REGULATION_OF_CYSTEINE_TYPE_ENDOPEPTIDASE_ACTIVITY		84	-0.26344	-1.09612	0.305499	1	1	4180	tags=35%, list=24%, signal=45%
GO_POSITIVE_REGULATION_OF_LYMPHOCYTE_MIGRATION	GO_POSITIVE_REGULATION_OF_LYMPHOCYTE_MIGRATION		26	-0.394412	-1.09211	0.399602	1	1	4434	tags=42%, list=25%, signal=56%
GO_POSITIVE_REGULATION_OF_ALPHA_BETA_T_CELL_DIFFERENTIATION	GO_POSITIVE_REGULATION_OF_ALPHA_BETA_T_CELL_DIFFERENTIATION		37	-0.343656	-1.09203	0.380769	1	1	3243	tags=27%, list=18%, signal=33%
GO_OXIDOREDUCTASE_ACTIVITY_ACTING_ON_THE_CH_NH_GROUP_OF_DONORS	GO_OXIDOREDUCTASE_ACTIVITY_ACTING_ON_THE_CH_NH_GROUP_OF_DONORS		24	-0.341241	-1.09093	0.341615	1	1	1837	tags=25%, list=10%, signal=28%
GO_REGULATION_OF_EPITHELIAL_CELL_MIGRATION	GO_REGULATION_OF_EPITHELIAL_CELL_MIGRATION		157	-0.285328	-1.0908	0.352362	1	1	4434	tags=34%, list=25%, signal=45%
GO_SARCOMERE_ORGANIZATION	GO_SARCOMERE_ORGANIZATION		25	-0.377051	-1.09062	0.334012	1	1	4094	tags=36%, list=23%, signal=47%
GO_POSITIVE_REGULATION_OF_RESPONSE_TO_CYTOKINE_STIMULUS	GO_POSITIVE_REGULATION_OF_RESPONSE_TO_CYTOKINE_STIMULUS		31	-0.320401	-1.09031	0.316	1	1	5220	tags=42%, list=30%, signal=59%
GO_NEGATIVE_REGULATION_OF_G_PROTEIN_COUPLED_RECEPTOR_PROTEIN_SIGNALING_PATHWAY	GO_NEGATIVE_REGULATION_OF_G_PROTEIN_COUPLED_RECEPTOR_PROTEIN_SIGNALING_PATHWAY		37	-0.34438	-1.09004	0.364562	1	1	6026	tags=43%, list=34%, signal=66%
GO_POSITIVE_REGULATION_OF_NEURAL_PRECURSOR_CELL_PROLIFERATION	GO_POSITIVE_REGULATION_OF_NEURAL_PRECURSOR_CELL_PROLIFERATION		37	-0.308051	-1.08956	0.340681	1	1	5505	tags=43%, list=31%, signal=63%
GO_ACTIVATION_OF_GTPASE_ACTIVITY	GO_ACTIVATION_OF_GTPASE_ACTIVITY		71	-0.284622	-1.08946	0.334653	1	1	4434	tags=39%, list=25%, signal=52%
GO_POSITIVE_REGULATION_OF_NEURON_DIFFERENTIATION	GO_POSITIVE_REGULATION_OF_NEURON_DIFFERENTIATION		292	-0.281455	-1.08943	0.339844	1	1	5640	tags=42%, list=32%, signal=60%
GO_REGULATION_OF_JNK_CASCADE	GO_REGULATION_OF_JNK_CASCADE		155	-0.254853	-1.08932	0.330059	1	1	3953	tags=31%, list=22%, signal=40%
GO_REGULATION_OF_EXTRACELLULAR_MATRIX_ORGANIZATION	GO_REGULATION_OF_EXTRACELLULAR_MATRIX_ORGANIZATION		26	-0.348664	-1.08919	0.325956	1	1	4266	tags=38%, list=24%, signal=51%
GO_COMPLEX_OF_COLLAGEN_TRIMERS	GO_COMPLEX_OF_COLLAGEN_TRIMERS		23	-0.486716	-1.0891	0.407332	1	1	7173	tags=65%, list=41%, signal=110%
GO_CLATHRIN_MEDIATED_ENDOCYTOSIS	GO_CLATHRIN_MEDIATED_ENDOCYTOSIS		35	-0.321802	-1.08874	0.354251	1	1	763	tags=20%, list=4%, signal=21%
GO_ENZYME_ACTIVATOR_ACTIVITY	GO_ENZYME_ACTIVATOR_ACTIVITY		443	-0.229762	-1.08856	0.305118	1	1	4106	tags=33%, list=23%, signal=41%
GO_NEGATIVE_REGULATION_OF_RESPONSE_TO_WOUNDING	GO_NEGATIVE_REGULATION_OF_RESPONSE_TO_WOUNDING		144	-0.300036	-1.08847	0.327968	1	1	5598	tags=41%, list=32%, signal=60%
GO_NEGATIVE_REGULATION_OF_EXTRINSIC_APOPTOTIC_SIGNALING_PATHWAY_VIA_DEATH_DOMAIN_RECEPTORS	GO_NEGATIVE_REGULATION_OF_EXTRINSIC_APOPTOTIC_SIGNALING_PATHWAY_VIA_DEATH_DOMAIN_RECEPTORS		34	-0.326184	-1.08741	0.342105	1	1	3909	tags=26%, list=22%, signal=34%
GO_AORTA_MORPHOGENESIS	GO_AORTA_MORPHOGENESIS		22	-0.385956	-1.08629	0.376238	1	1	1987	tags=27%, list=11%, signal=31%
GO_REGULATION_OF_REACTIVE_OXYGEN_SPECIES_BIOSYNTHETIC_PROCESS	GO_REGULATION_OF_REACTIVE_OXYGEN_SPECIES_BIOSYNTHETIC_PROCESS		64	-0.298476	-1.08613	0.361165	1	1	4605	tags=31%, list=26%, signal=42%
GO_ESTROUS_CYCLE	GO_ESTROUS_CYCLE		19	-0.395744	-1.08611	0.370143	1	1	5118	tags=47%, list=29%, signal=67%
GO_REGULATION_OF_NOREPINEPHRINE_SECRETION	GO_REGULATION_OF_NOREPINEPHRINE_SECRETION		16	-0.417655	-1.08586	0.362403	1	1	6287	tags=56%, list=36%, signal=87%
GO_REGULATION_OF_RHO_PROTEIN_SIGNAL_TRANSDUCTION	GO_REGULATION_OF_RHO_PROTEIN_SIGNAL_TRANSDUCTION		106	-0.301188	-1.08453	0.36553	1	1	4169	tags=36%, list=24%, signal=47%
GO_METANEPHRIC_NEPHRON_DEVELOPMENT	GO_METANEPHRIC_NEPHRON_DEVELOPMENT		31	-0.360697	-1.08445	0.350195	1	1	2463	tags=23%, list=14%, signal=26%
GO_INTRINSIC_APOPTOTIC_SIGNALING_PATHWAY	GO_INTRINSIC_APOPTOTIC_SIGNALING_PATHWAY		147	-0.229362	-1.08398	0.290323	1	1	3693	tags=31%, list=21%, signal=38%
GO_REGULATION_OF_SMOOTH_MUSCLE_CELL_MIGRATION	GO_REGULATION_OF_SMOOTH_MUSCLE_CELL_MIGRATION		49	-0.348641	-1.08386	0.381783	1	1	5956	tags=47%, list=34%, signal=71%
GO_PROTEIN_LIPID_COMPLEX_BINDING	GO_PROTEIN_LIPID_COMPLEX_BINDING		23	-0.370197	-1.08385	0.344828	1	1	7418	tags=74%, list=42%, signal=127%
GO_NEGATIVE_REGULATION_OF_VASCULATURE_DEVELOPMENT	GO_NEGATIVE_REGULATION_OF_VASCULATURE_DEVELOPMENT		73	-0.319212	-1.08301	0.386064	1	1	5513	tags=45%, list=31%, signal=65%
GO_INTRINSIC_COMPONENT_OF_MITOCHONDRIAL_OUTER_MEMBRANE	GO_INTRINSIC_COMPONENT_OF_MITOCHONDRIAL_OUTER_MEMBRANE		21	-0.353673	-1.08278	0.356164	1	1	2897	tags=38%, list=16%, signal=46%
GO_REGULATION_OF_STRIATED_MUSCLE_CELL_DIFFERENTIATION	GO_REGULATION_OF_STRIATED_MUSCLE_CELL_DIFFERENTIATION		76	-0.280373	-1.08251	0.33871	1	1	4998	tags=33%, list=28%, signal=46%
GO_AMINOGLYCAN_BIOSYNTHETIC_PROCESS	GO_AMINOGLYCAN_BIOSYNTHETIC_PROCESS		104	-0.317706	-1.08247	0.360825	1	1	5054	tags=38%, list=29%, signal=52%
GO_DORSAL_VENTRAL_NEURAL_TUBE_PATTERNING	GO_DORSAL_VENTRAL_NEURAL_TUBE_PATTERNING		16	-0.378895	-1.08196	0.329341	1	1	2949	tags=25%, list=17%, signal=30%
GO_NONRIBOSOMAL_PEPTIDE_BIOSYNTHETIC_PROCESS	GO_NONRIBOSOMAL_PEPTIDE_BIOSYNTHETIC_PROCESS		16	-0.380775	-1.08184	0.374753	1	1	1664	tags=31%, list=9%, signal=34%
GO_POSITIVE_REGULATION_OF_CAMP_METABOLIC_PROCESS	GO_POSITIVE_REGULATION_OF_CAMP_METABOLIC_PROCESS		77	-0.309968	-1.08174	0.351889	1	1	6299	tags=42%, list=36%, signal=64%
GO_POSITIVE_REGULATION_OF_VASOCONSTRICTION	GO_POSITIVE_REGULATION_OF_VASOCONSTRICTION		34	-0.376752	-1.08167	0.382812	1	1	7922	tags=59%, list=45%, signal=106%
GO_RESPONSE_TO_ACTIVITY	GO_RESPONSE_TO_ACTIVITY		64	-0.275153	-1.08042	0.313609	1	1	5131	tags=45%, list=29%, signal=64%
GO_POSITIVE_REGULATION_OF_SYNAPTIC_TRANSMISSION_GLUTAMATERGIC	GO_POSITIVE_REGULATION_OF_SYNAPTIC_TRANSMISSION_GLUTAMATERGIC		17	-0.453418	-1.08031	0.391813	1	1	5118	tags=47%, list=29%, signal=66%
GO_BRUSH_BORDER_MEMBRANE	GO_BRUSH_BORDER_MEMBRANE		55	-0.294328	-1.07948	0.344689	1	1	6172	tags=42%, list=35%, signal=64%
GO_REGULATION_OF_ERBB_SIGNALING_PATHWAY	GO_REGULATION_OF_ERBB_SIGNALING_PATHWAY		78	-0.268999	-1.07929	0.337945	1	1	1933	tags=22%, list=11%, signal=24%
[truncated: 1,898 more rows]
